# Supplementary material for: Serum N-Glycomics Stratifies Bacteremic Patients Infected with Different Pathogens
Source: MDPI journal article supplement (doi:10.3390/jcm10030516), 2021-02-01
Supplement: s1 [file s1]

# Supplementary Data S1-S3

for

## Serum *N*-Glycomics Stratifies Bacteremic Patients Infected with Different Pathogens

**Sayantani Chatterjee <sup>1,2</sup>, Rebeca Kawahara <sup>1,2</sup>, Harry C. Tjondro <sup>1,2</sup>, David R. Shaw <sup>3</sup>, Marni Nenke <sup>4,5,6</sup>, David J. Torpy <sup>4,5</sup>, Morten Thaysen-Andersen <sup>1,2\*</sup>**

*<sup>1</sup>Department of Molecular Sciences, Macquarie University, Sydney, Australia*

*<sup>2</sup>Biomolecular Discovery Research Centre, Macquarie University, Sydney, NSW, Australia*

*<sup>3</sup>Infectious Diseases Clinic, Royal Adelaide Hospital, Adelaide, Australia*

*<sup>4</sup>Endocrine and Metabolic Unit, Royal Adelaide Hospital, Adelaide, Australia*

*<sup>5</sup>School of Medicine, University of Adelaide, Adelaide, Australia*

*<sup>6</sup>Department of Endocrinology and Diabetes, The Queen Elizabeth Hospital, Woodville South, Australia*

**\*Corresponding author:**

Dr Morten Thaysen-Andersen, PhD

Department of Molecular Sciences

Macquarie University, NSW-2109, Sydney, Australia

Ph: +61 2 9850 7487

Email: morten.andersen@mq.edu.au

# Overview of Supplementary Data

## **Annotation and Fragmentation Key** (slide 3)

**Supplementary Data S1:** BPC, EICs and manually annotated PGC-LC-ESI-CID-MS (-) spectra of *N*-glycans (alditols) of key importance released from bacteremic sera (Slide 4 – Slide 19).

**Supplementary Data S2:** Examples of EICs, S/N and manually annotated PGC-LC-ESI-CID-MS (-) spectra of very low abundant *N*-glycans (alditols) released from bacteremic sera (0.01%-0.15% relative abundance levels) (Slide 20 – Slide 25).

**Supplementary Data S3:** Manually annotated PGC-LC-ESI-CID-MS/MS (-) spectra of all reported *N*-glycans (alditols) released from bacteremic and healthy sera (Slide 26 – Slide 88).

# Annotation and Fragmentation Key

-  Mannose (Man) (162.0528 Da)
-  Galactose (Gal) (162.0528 Da)
-  N-Acetylglucosamine (GlcNAc) (203.0794 Da)
-  N-Acetylneuraminic acid (NeuAc) (291.0954 Da)
-  Fucose (Fuc) (146.0579 Da)
-  Cross-ring fragment (unspecified)
-  Indicates mostly Y ions (includes oxygen of glyosidic linkage)
-  Indicates mostly Z ions (excludes oxygen of glyosidic linkage)
-  Reduced reducing end

a-b-c-d Isomers

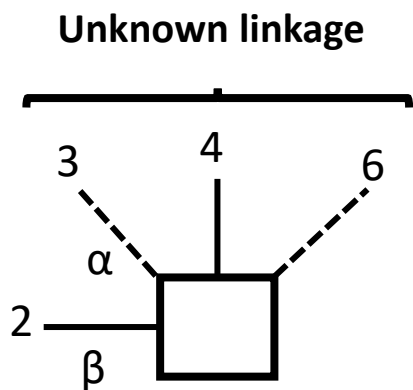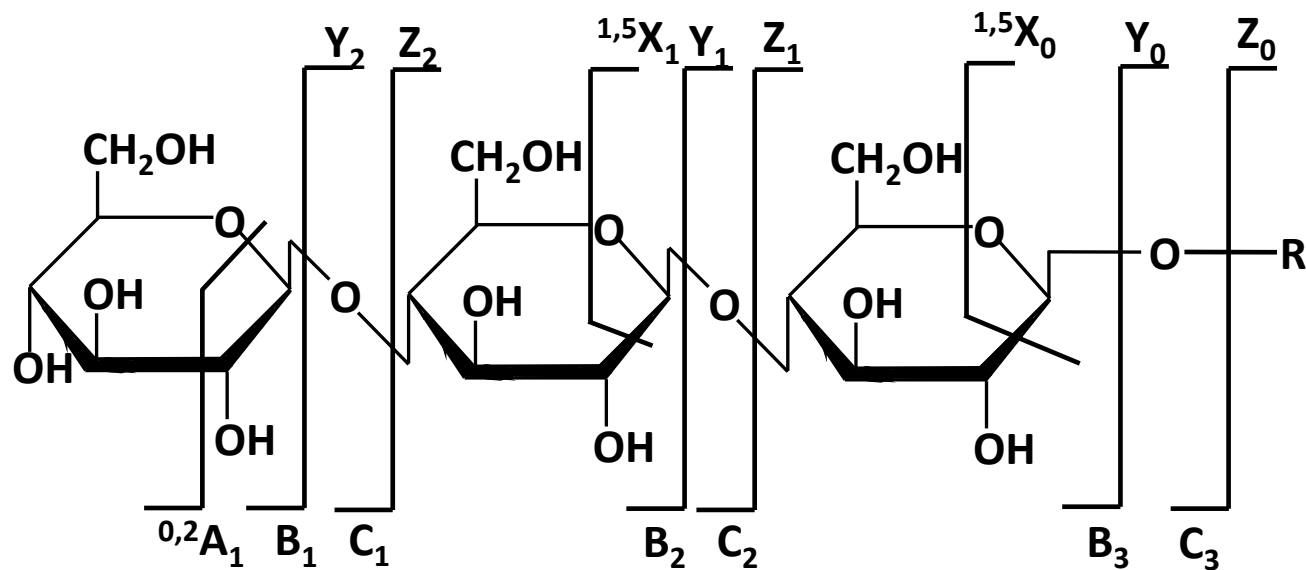

## **Supplementary Data S1**

BPC, EICs and manually annotated PGC-LC-ESI-CID-MS (-)  
spectra of *N*-glycans (alditols) of key importance  
released from bacteremic sera

*Pseudomonas aeruginosa* 12  
Base peak chromatogram  
( $m/z$  600-2,000)

Relative abundance

*N*-glycan elution (RT 16.0-60.0 min)

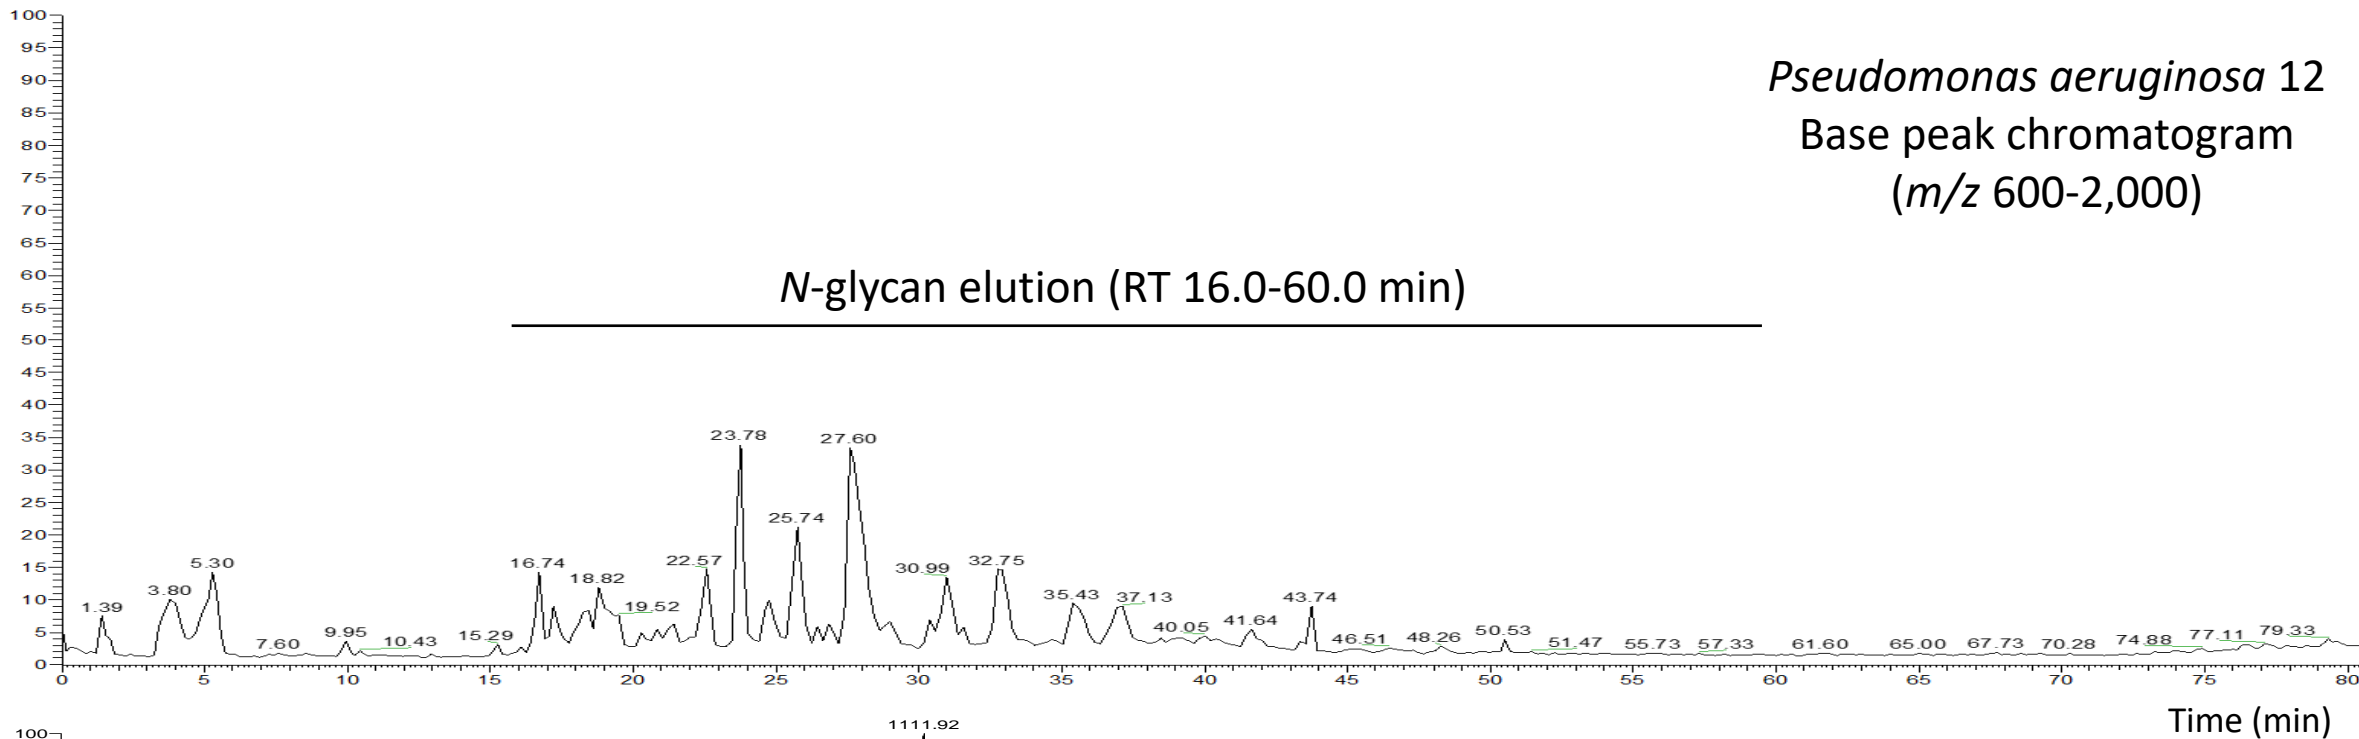

Relative abundance

Summed MS  
(RT 16.0-60.0 min)

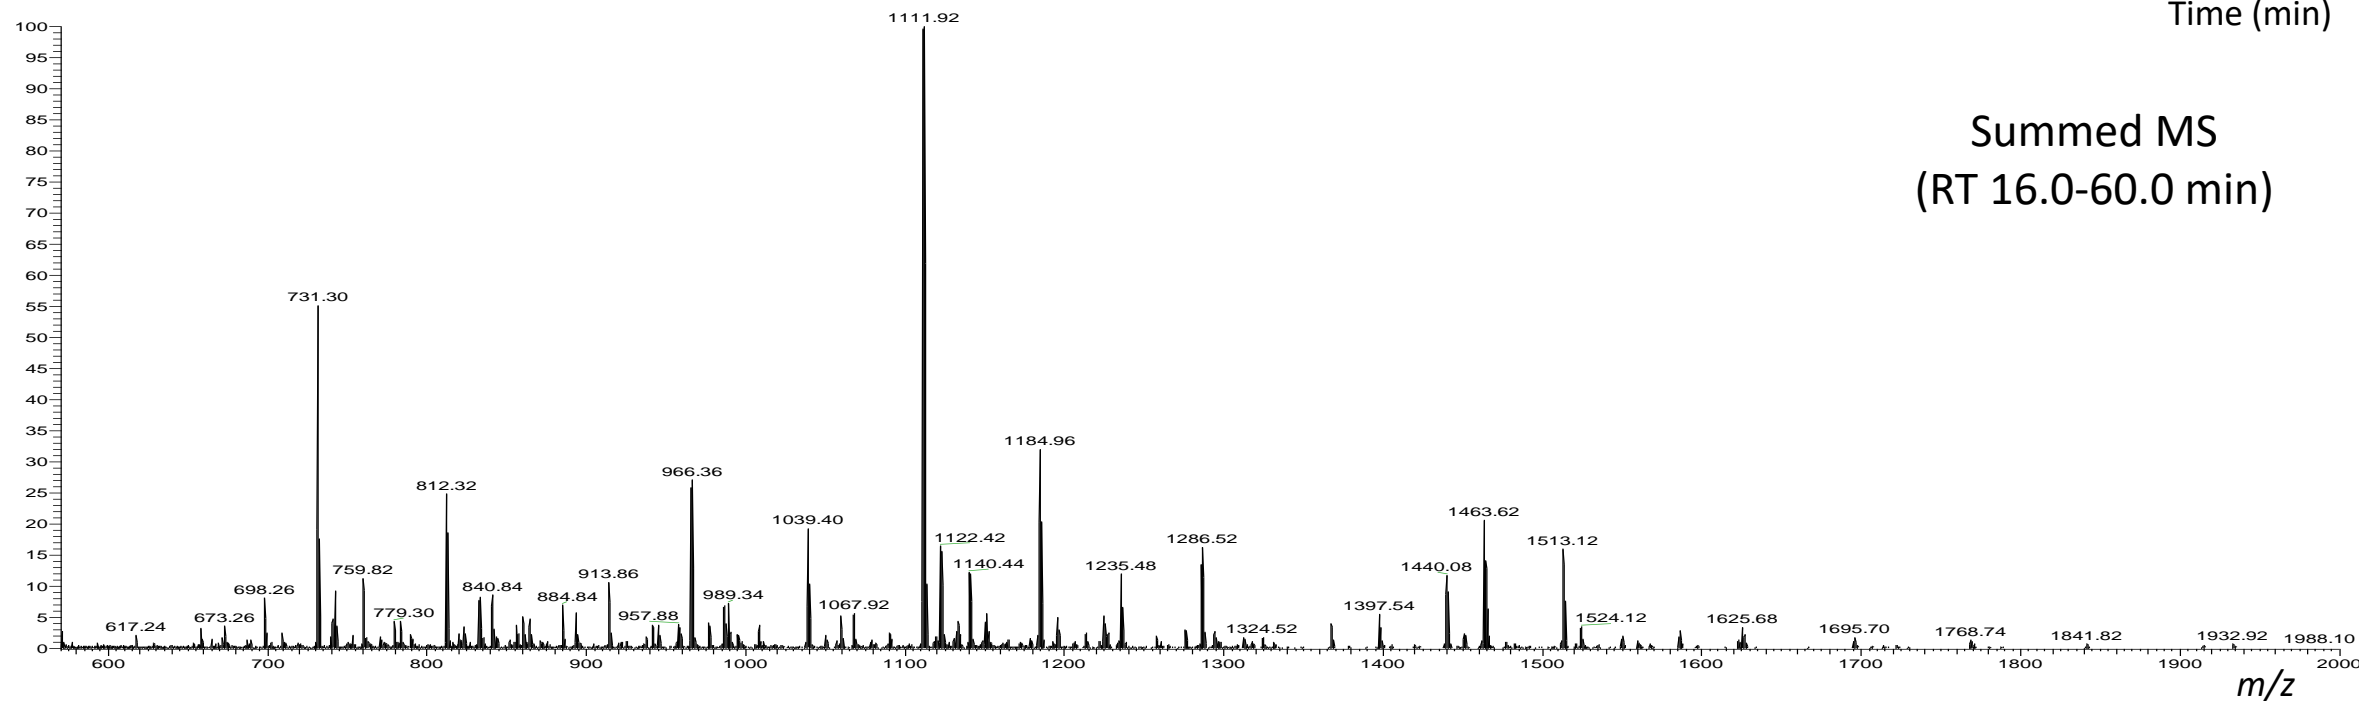

*Escherichia coli* 6  
Extracted ion chromatogram  
( $m/z$  799.82)

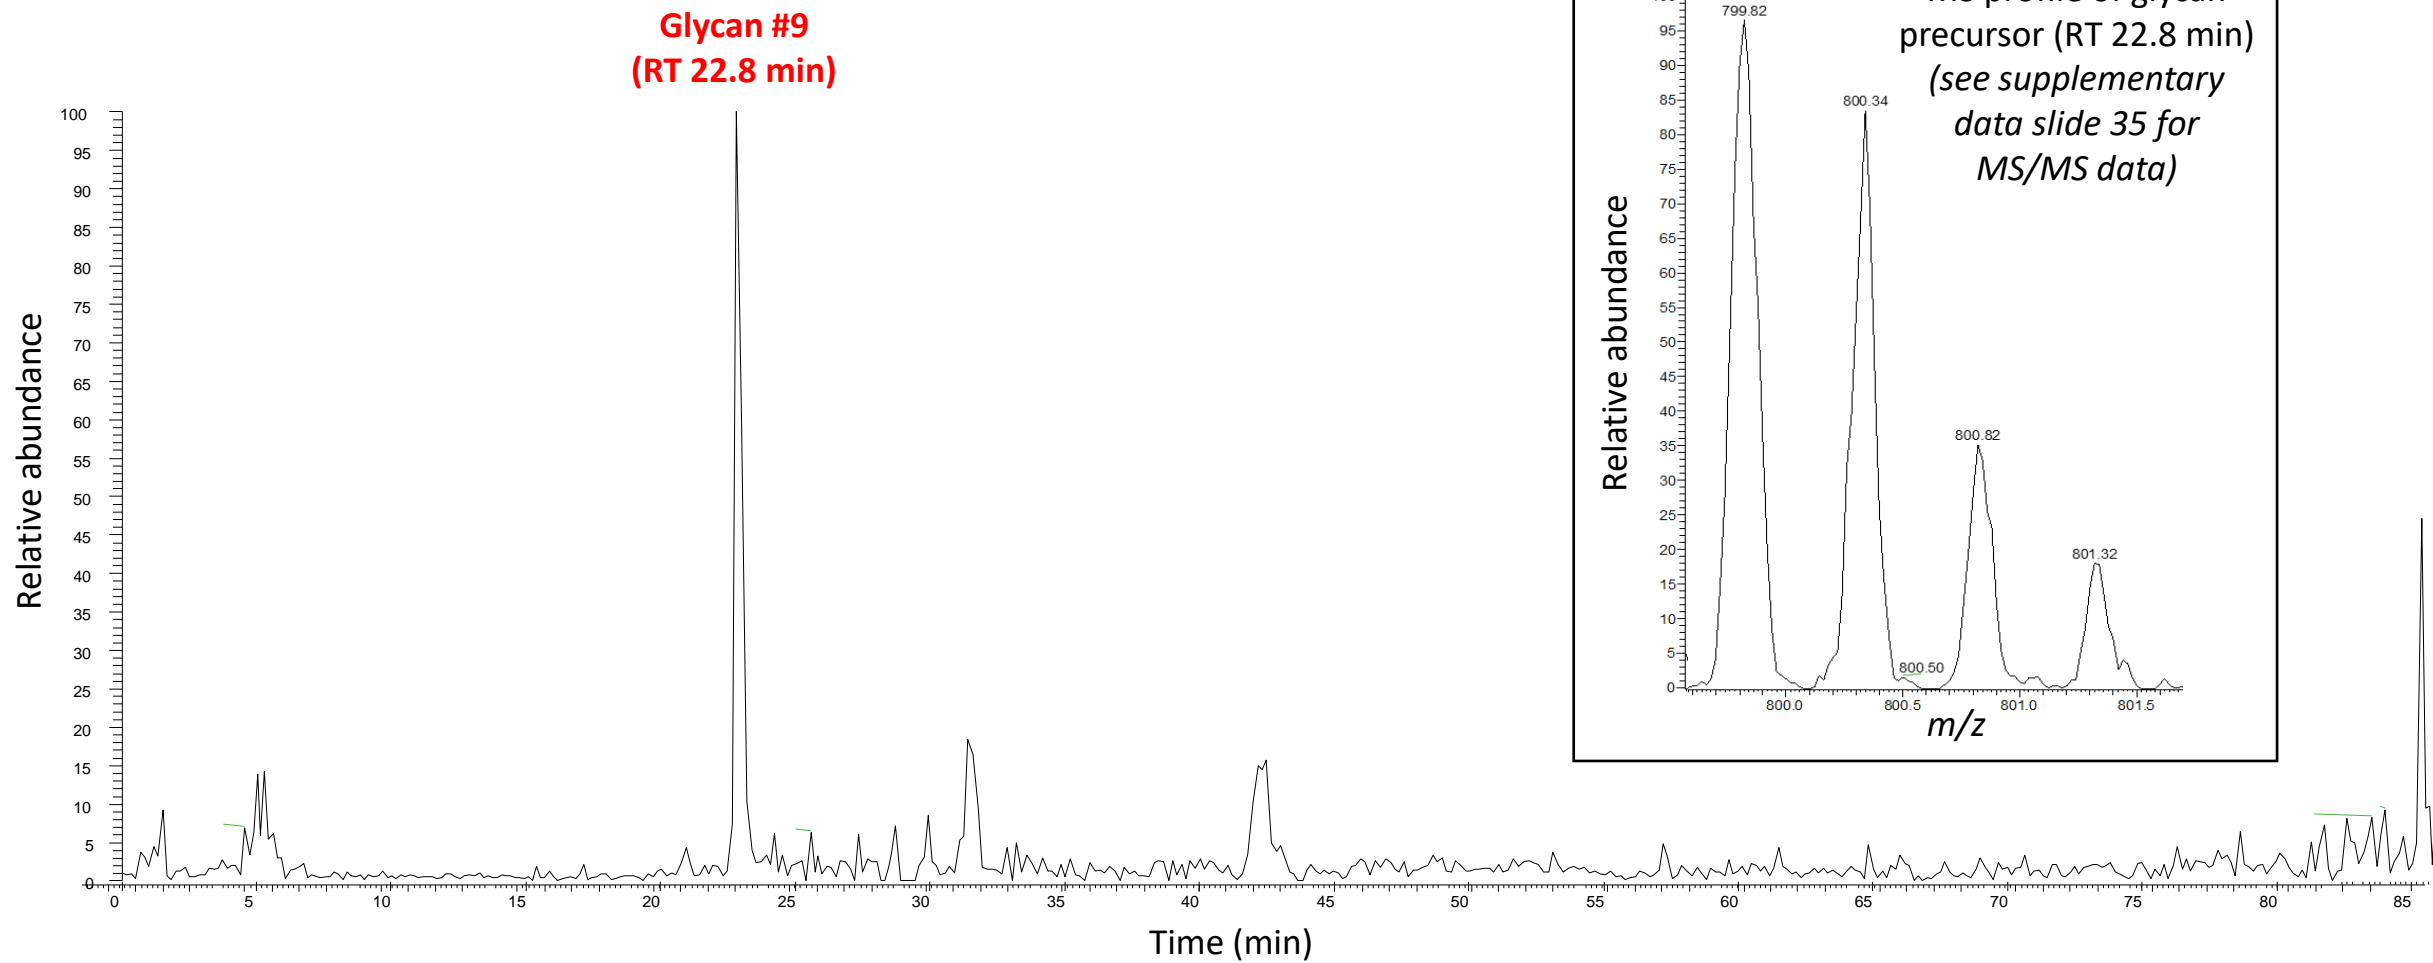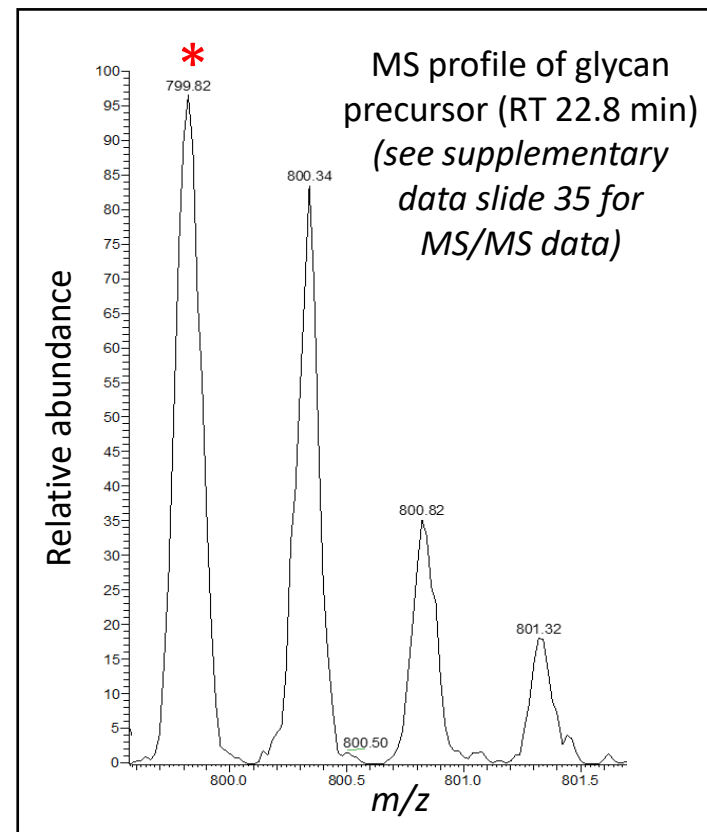

**\*Monoisotopic signal of identified glycan**

*Pseudomonas aeruginosa* 12  
Extracted Ion Chromatogram  
(*m/z* 1260.48)

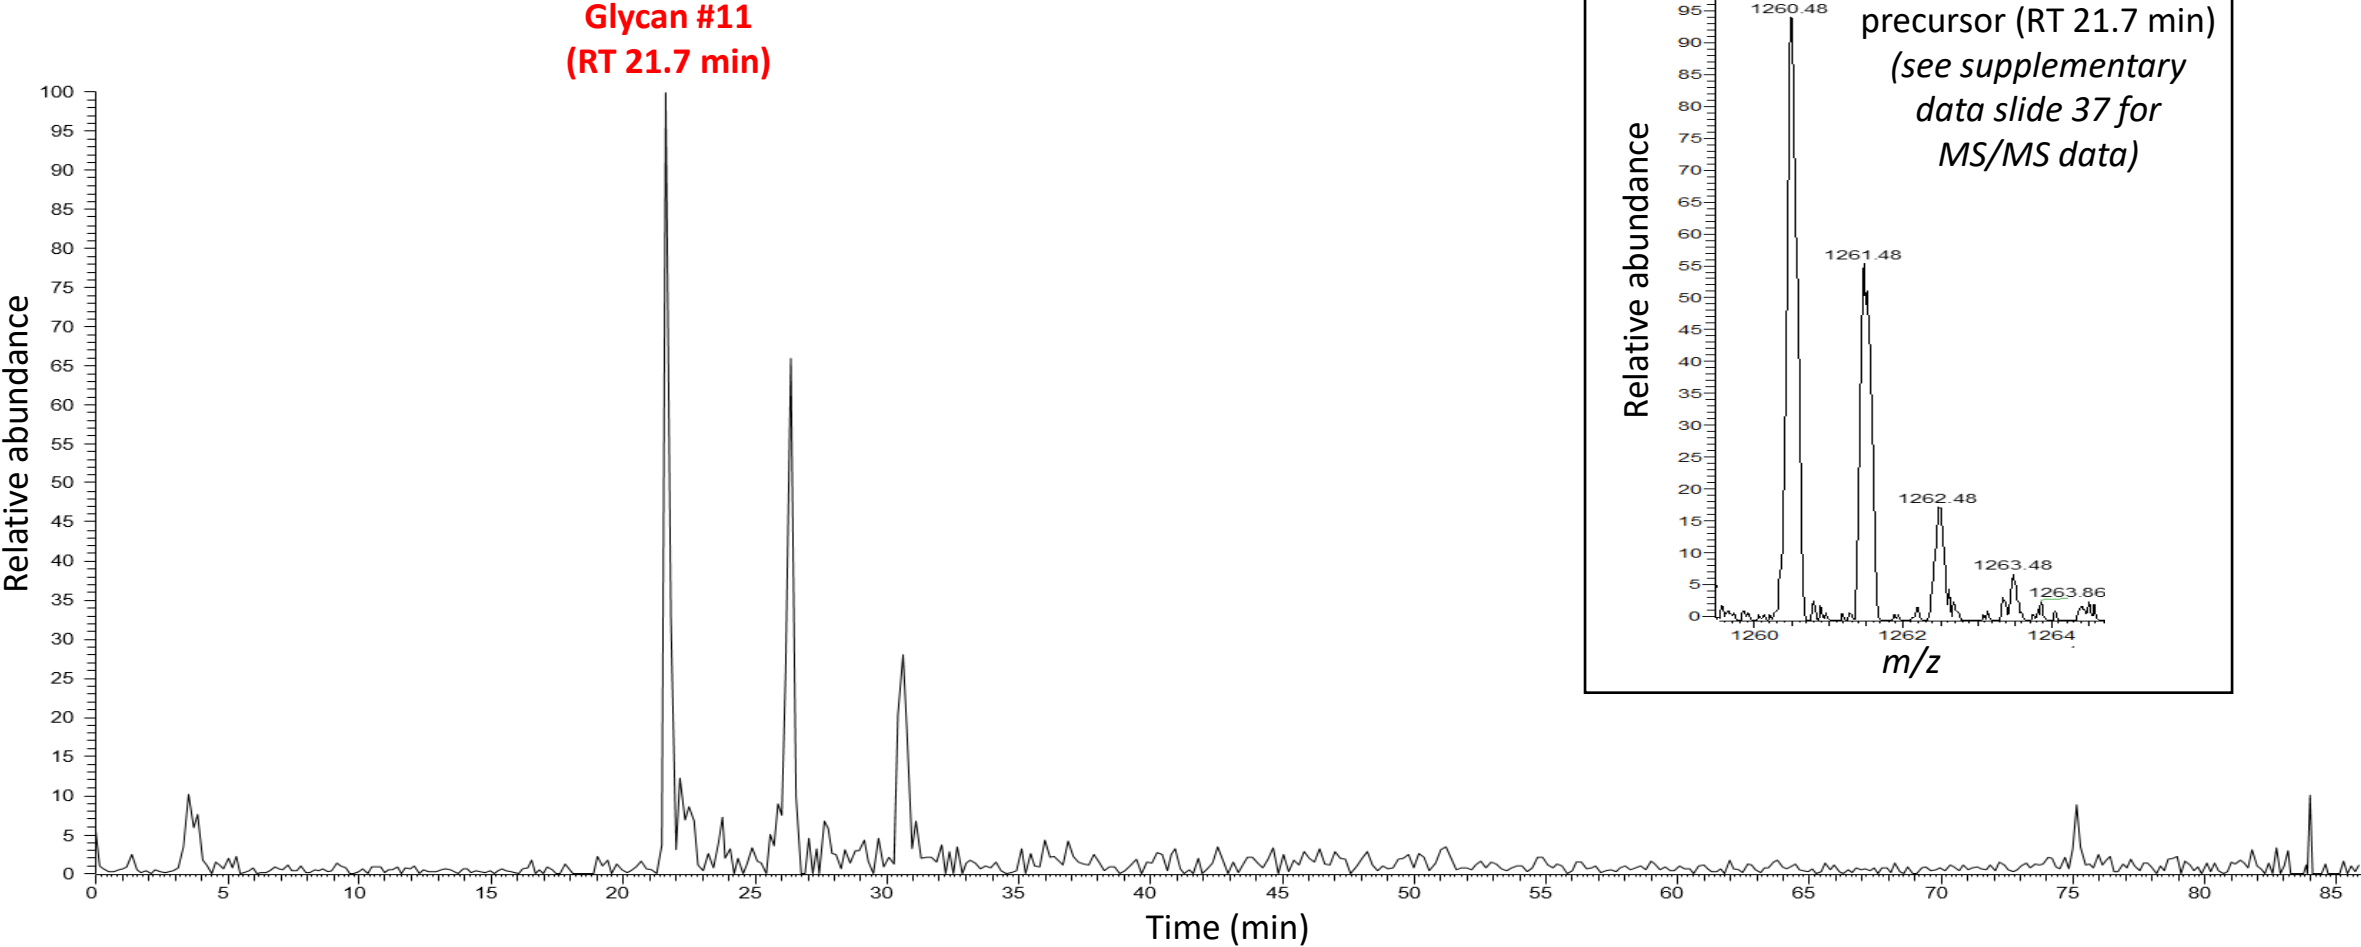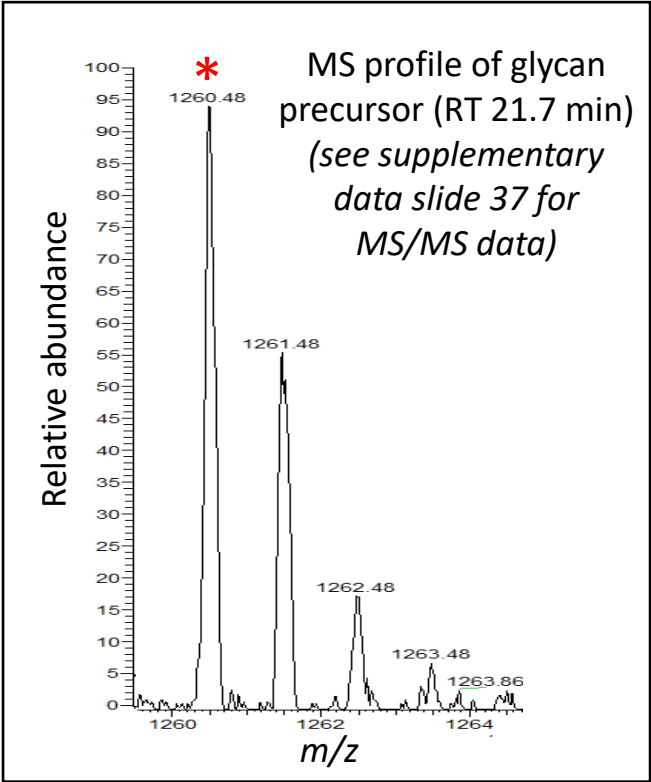

**\*Monoisotopic signal of identified glycan**

*Staphylococcus aureus* 19  
Extracted Ion Chromatogram  
 $m/z$  783.32

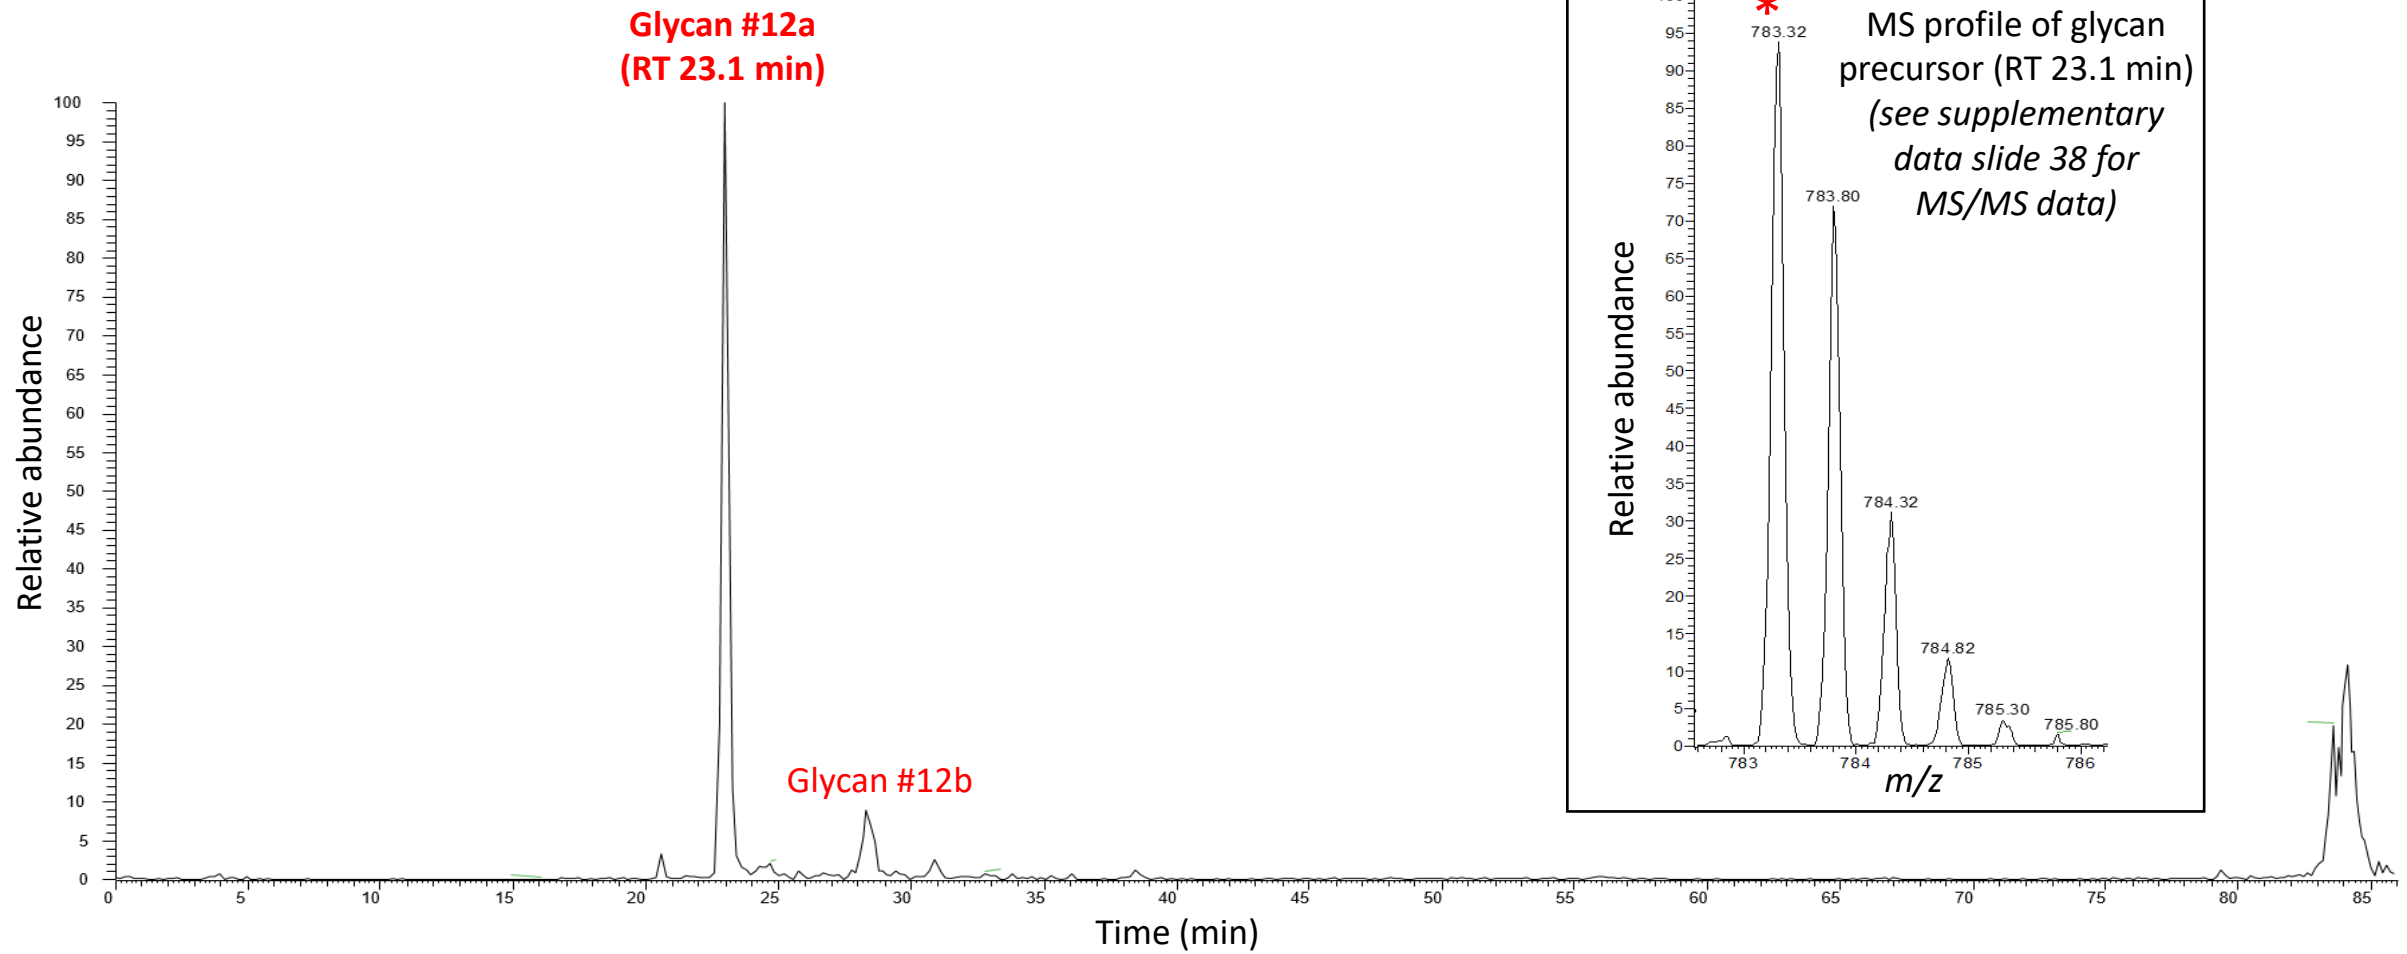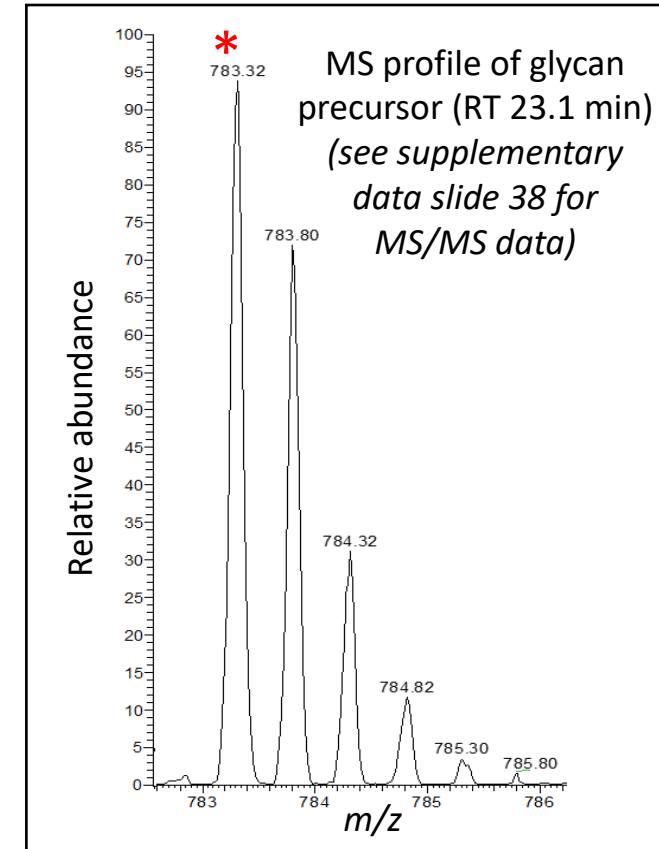

\*Monoisotopic signal of identified glycan



*Streptococcus viridans* 29  
Extracted Ion Chromatogram  
 $m/z$  1512.68

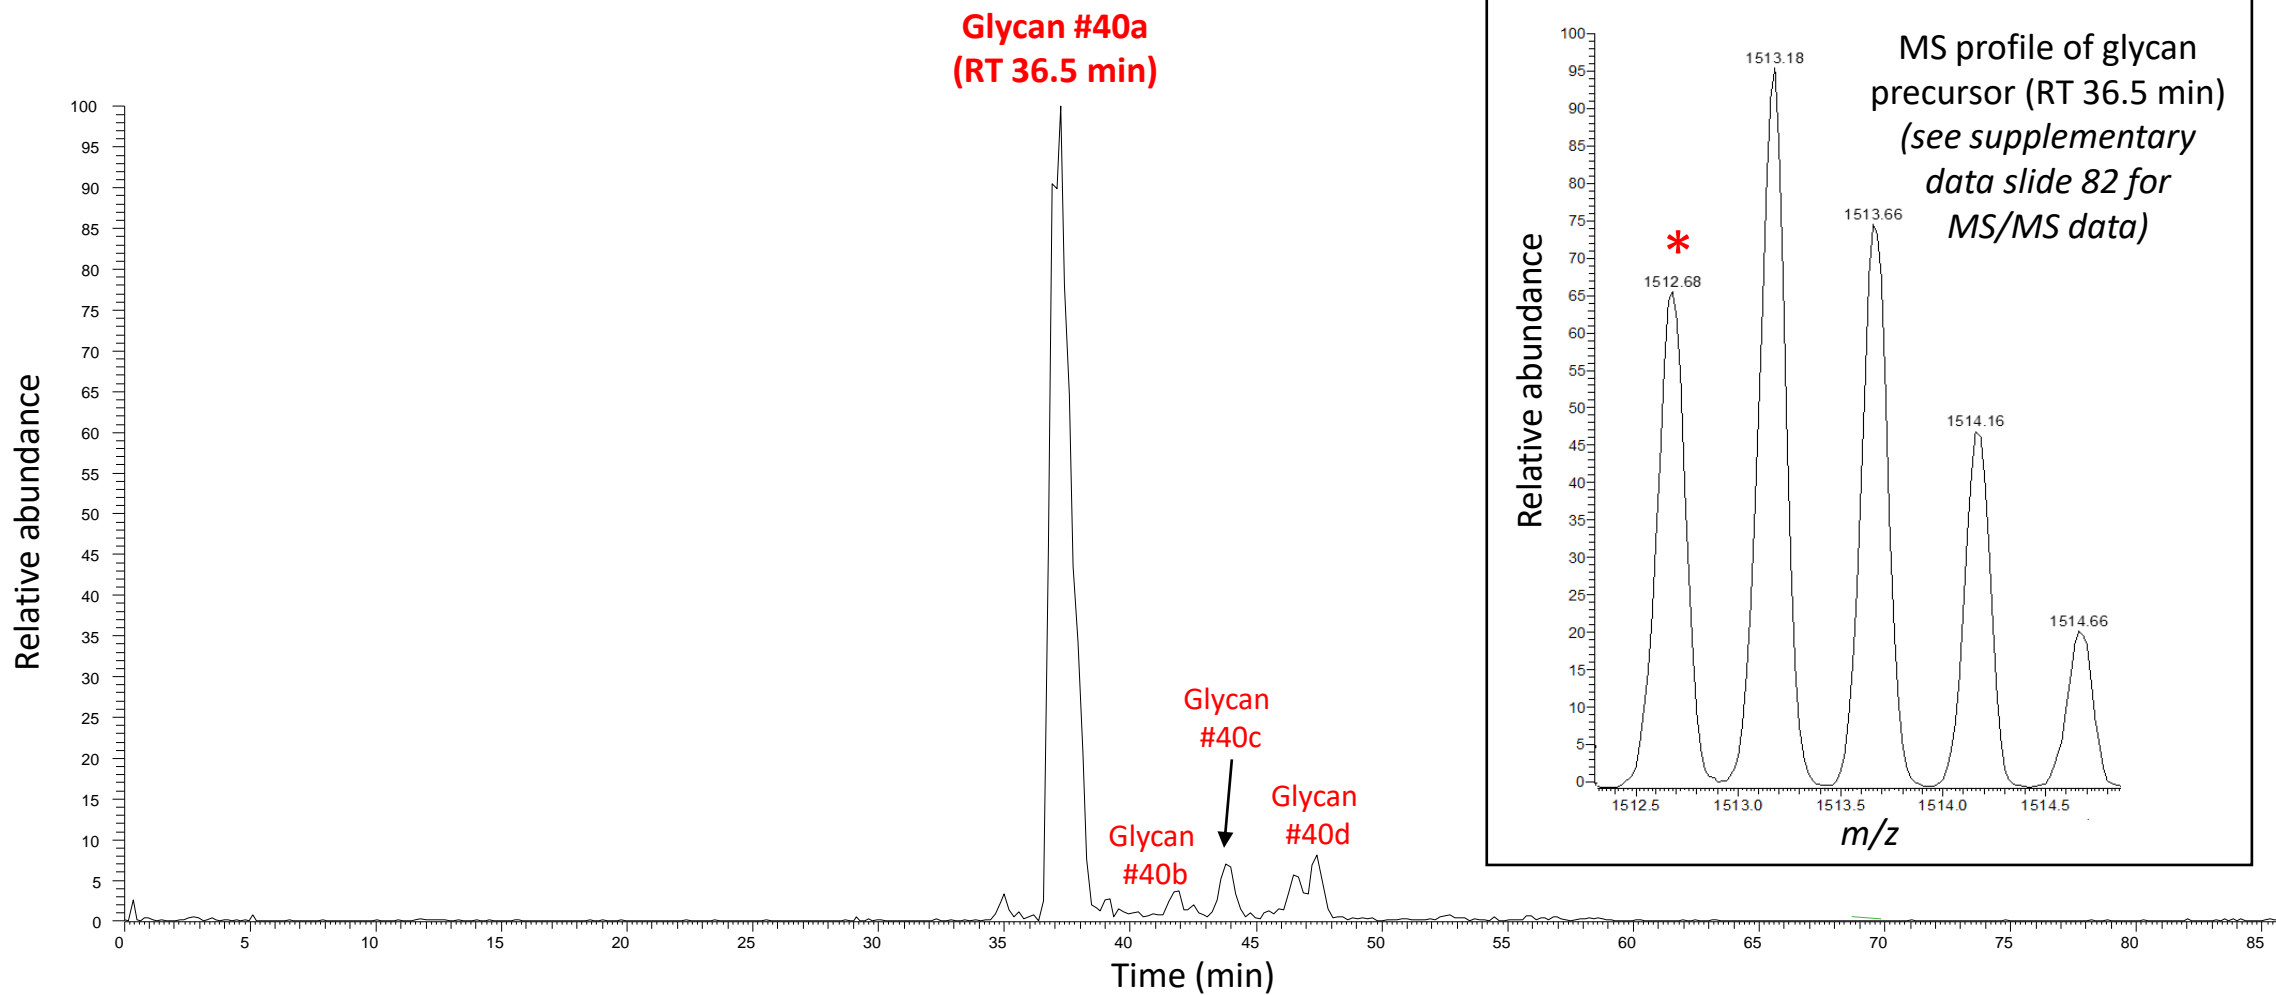

\*Monoisotopic signal of identified glycan

*Pseudomonas aeruginosa* 12  
Extracted Ion Chromatogram  
 $m/z$  832.82

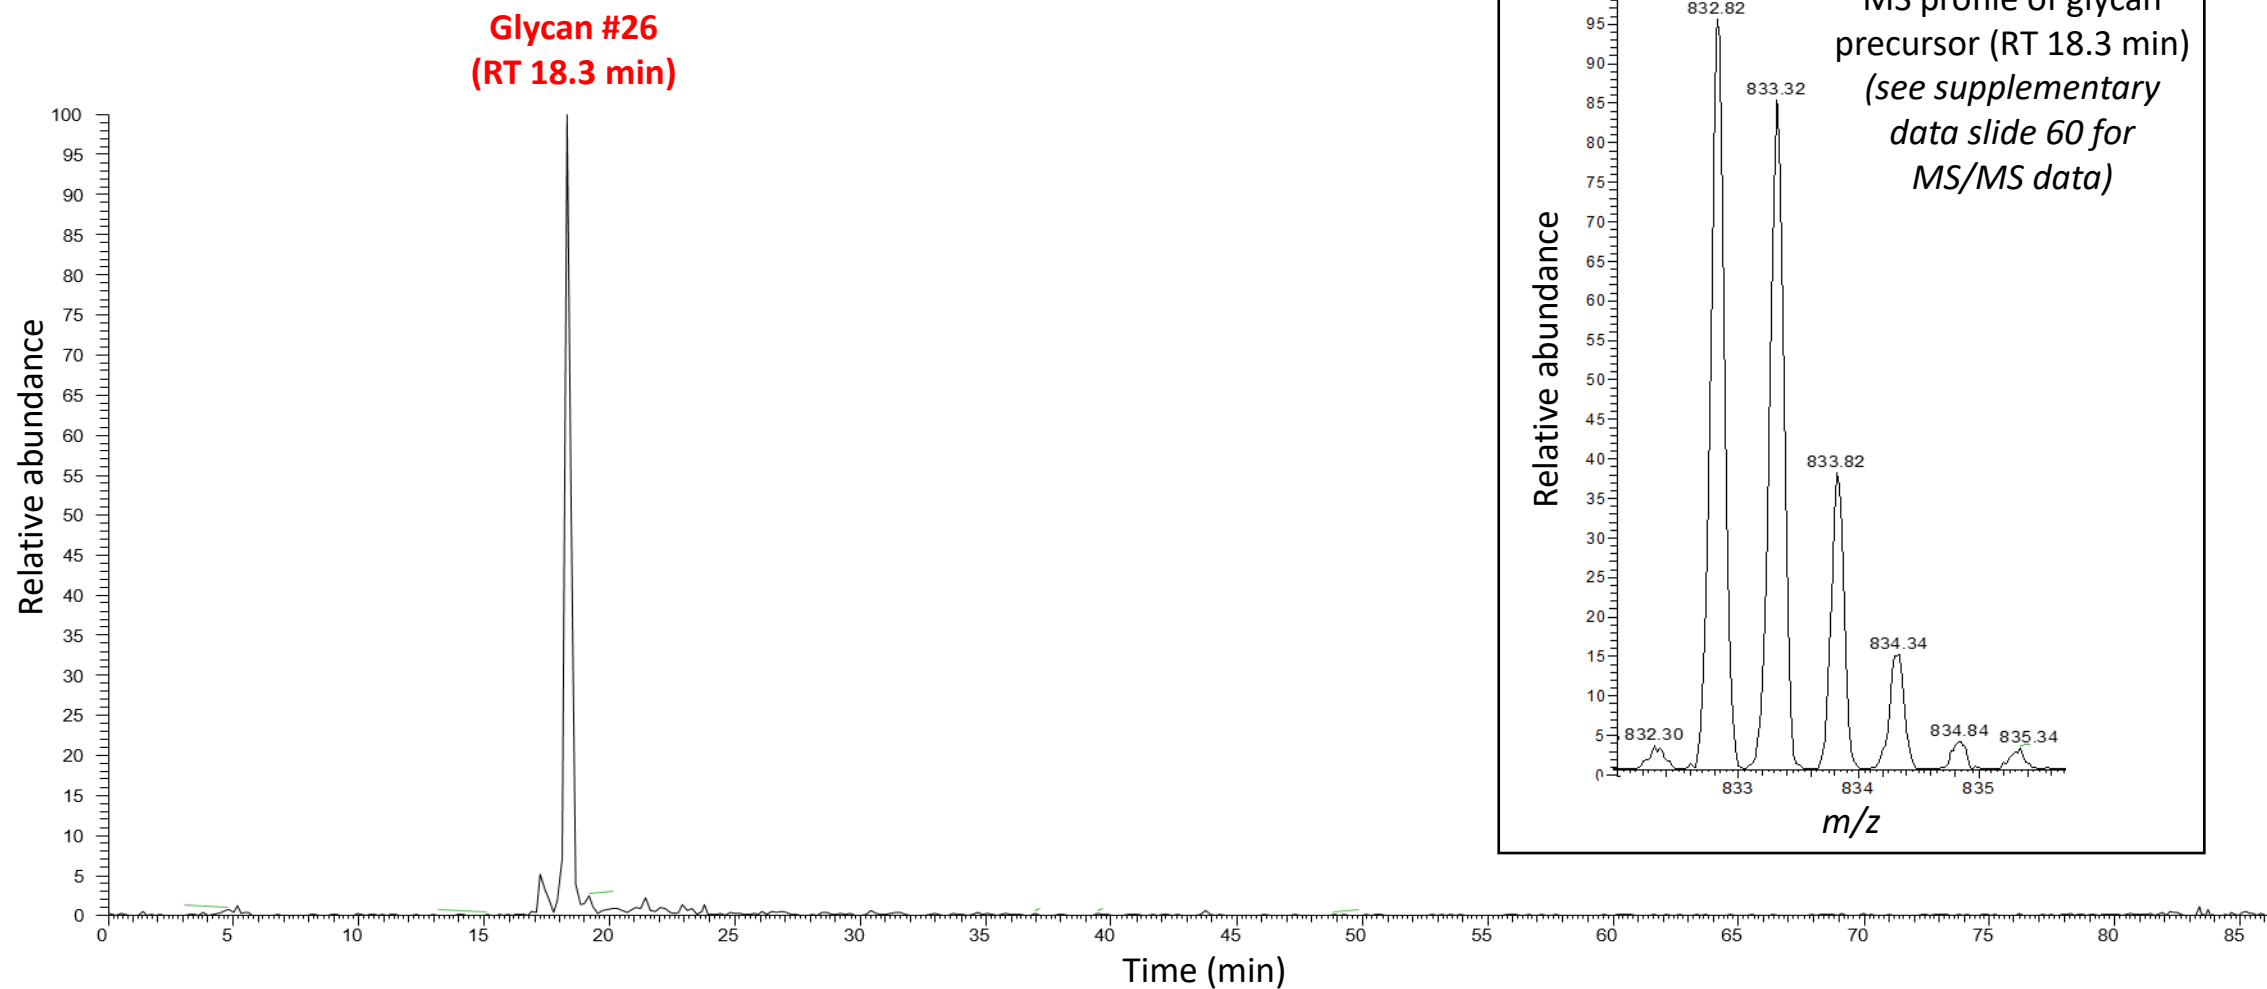

*Pseudomonas aeruginosa* 12  
Extracted Ion Chromatogram  
 $m/z$  739.30

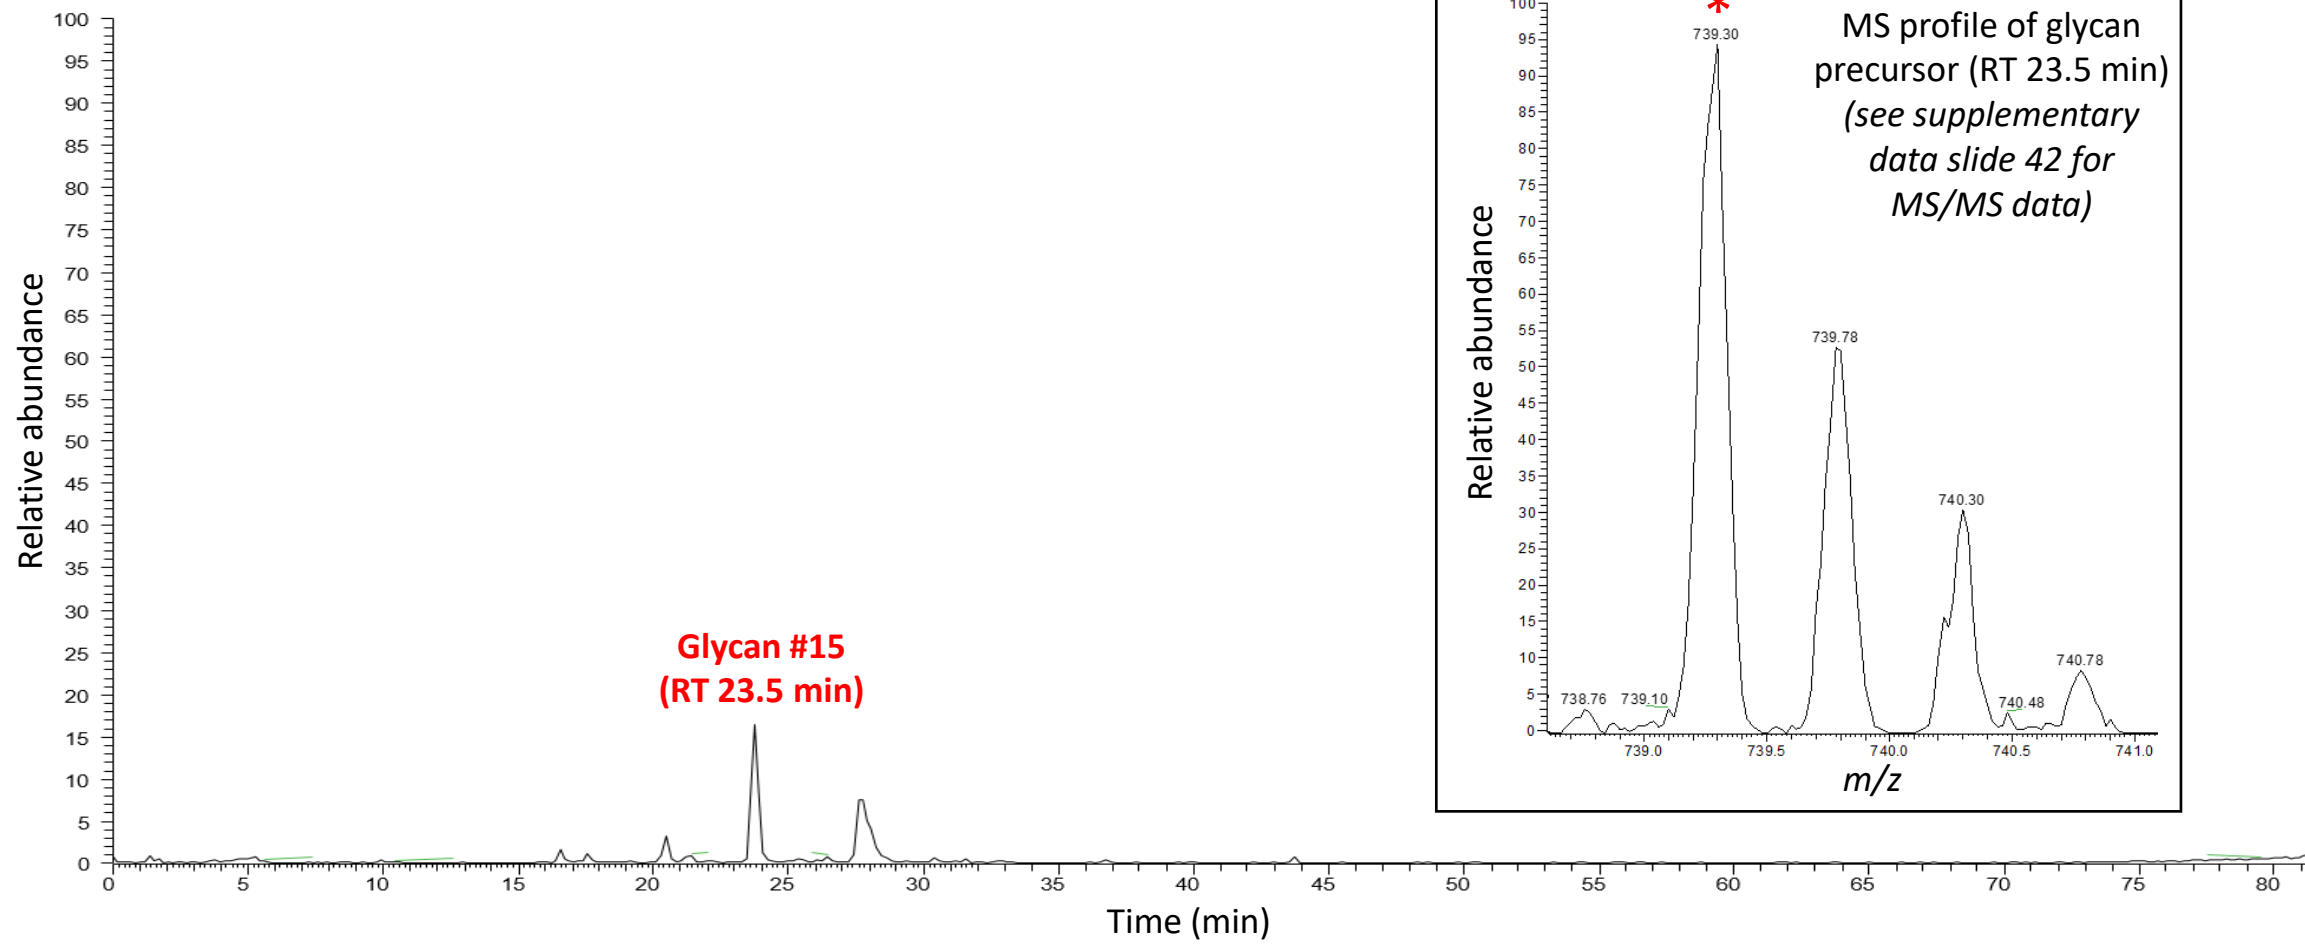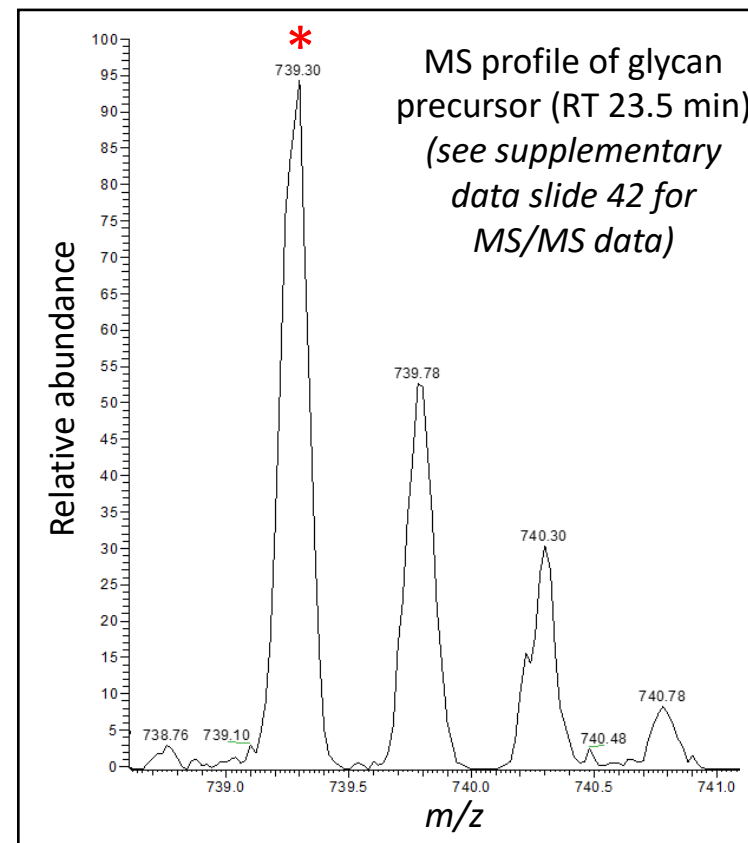

\*Monoisotopic signal of identified glycan

*Pseudomonas aeruginosa* 12  
Extracted Ion Chromatogram  
 $m/z$  1059.42

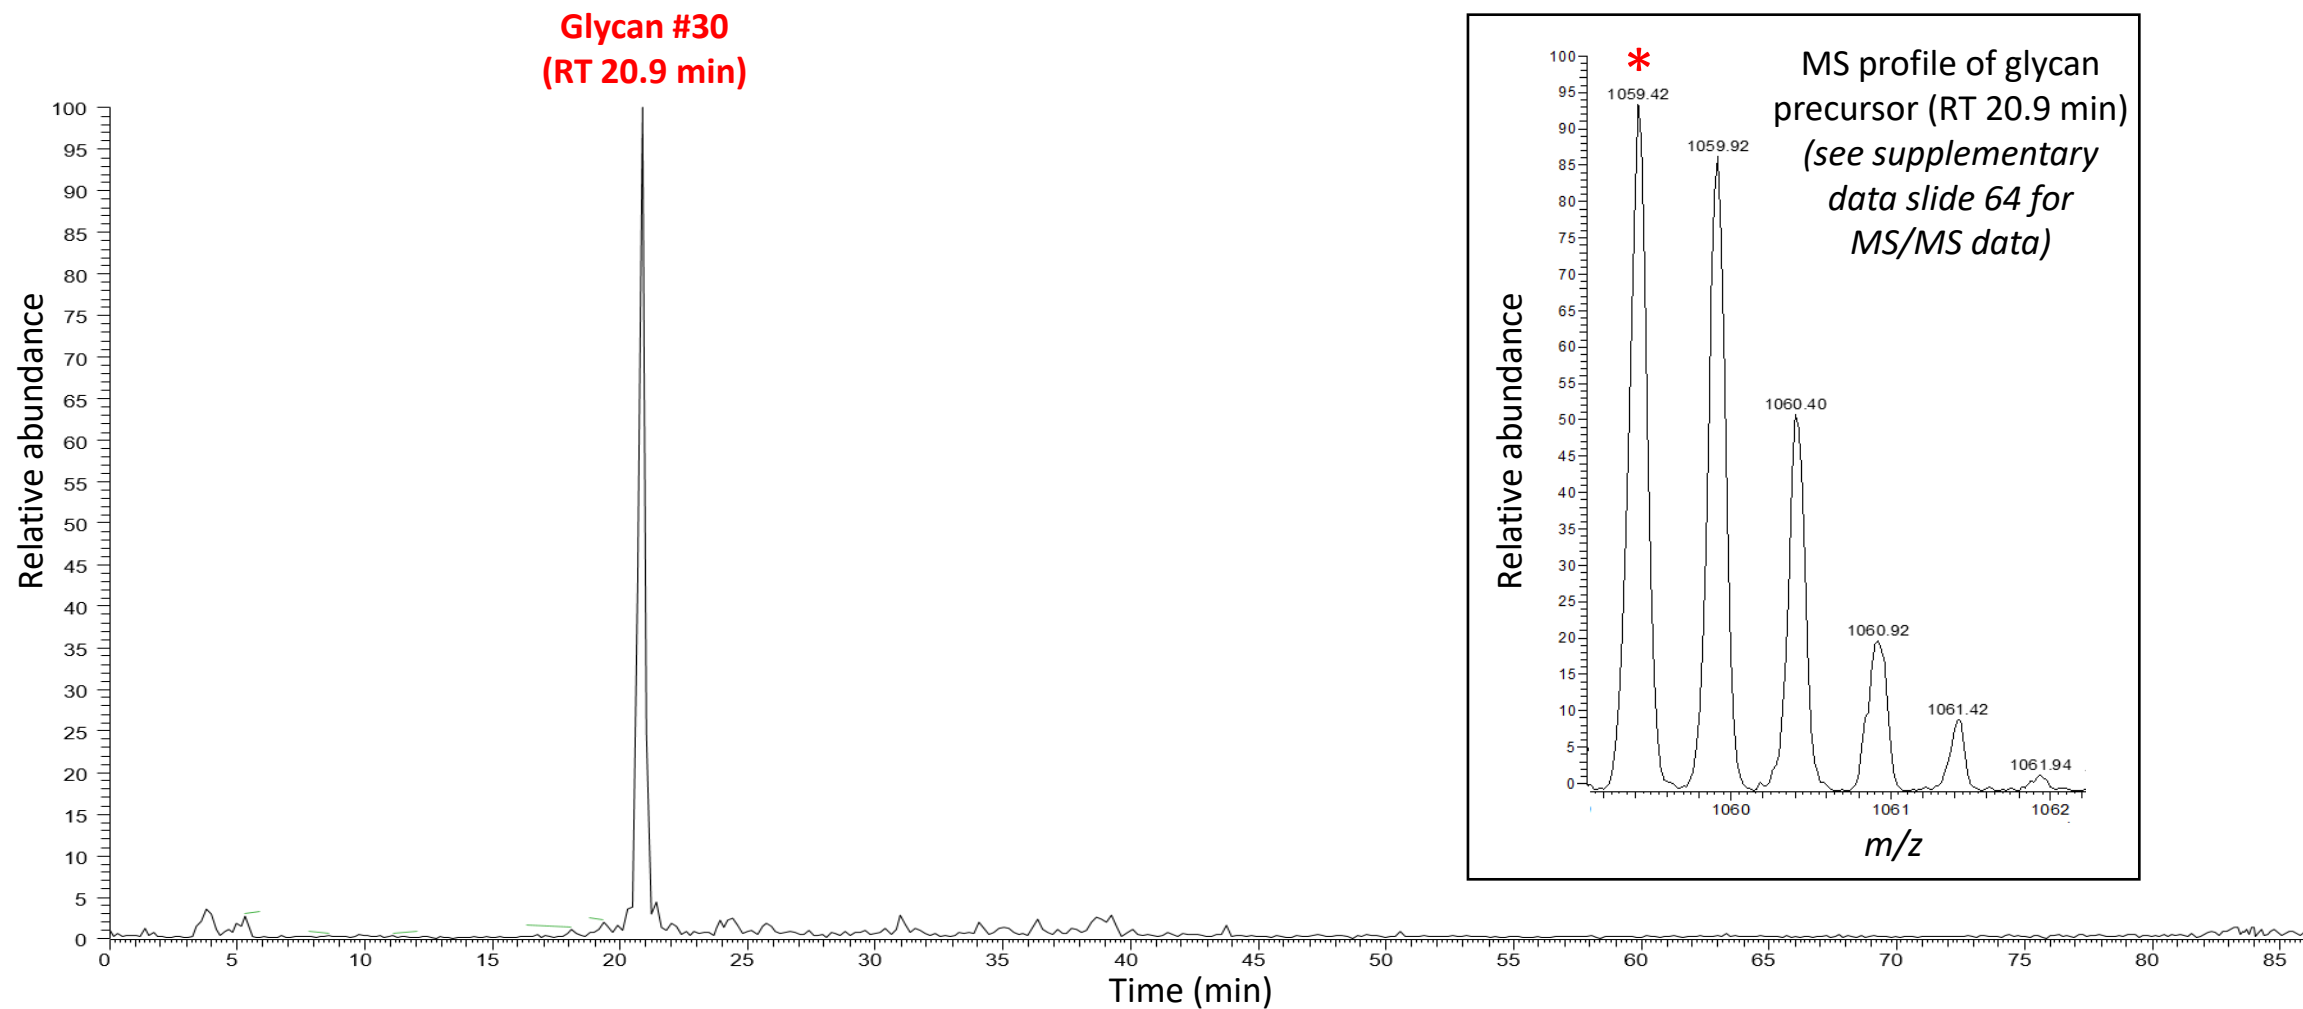

**\*Monoisotopic signal of identified glycan**

*Pseudomonas aeruginosa* 12  
Extracted Ion Chromatogram  
 $m/z$  731.30

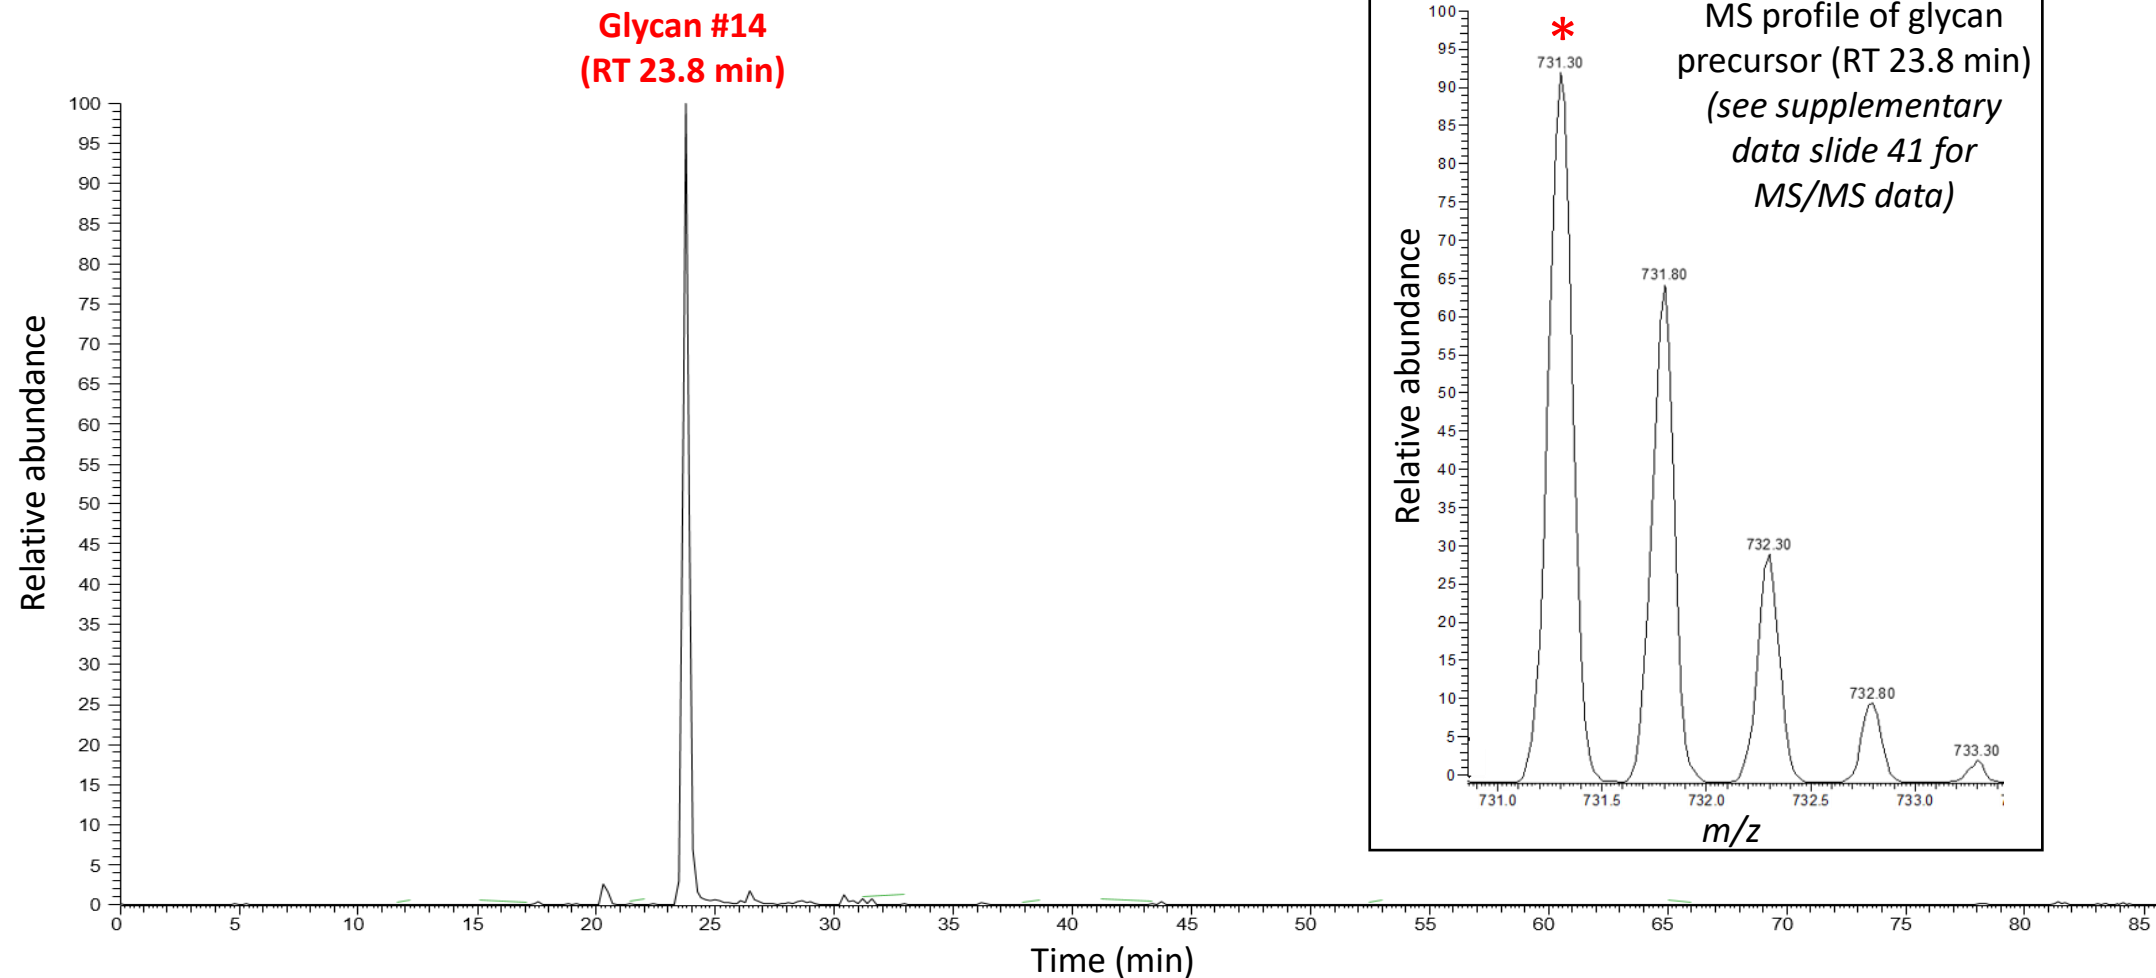

\*Monoisotopic signal of identified glycan

*Pseudomonas aeruginosa* 12  
Extracted Ion Chromatogram  
 $m/z$  1038.92

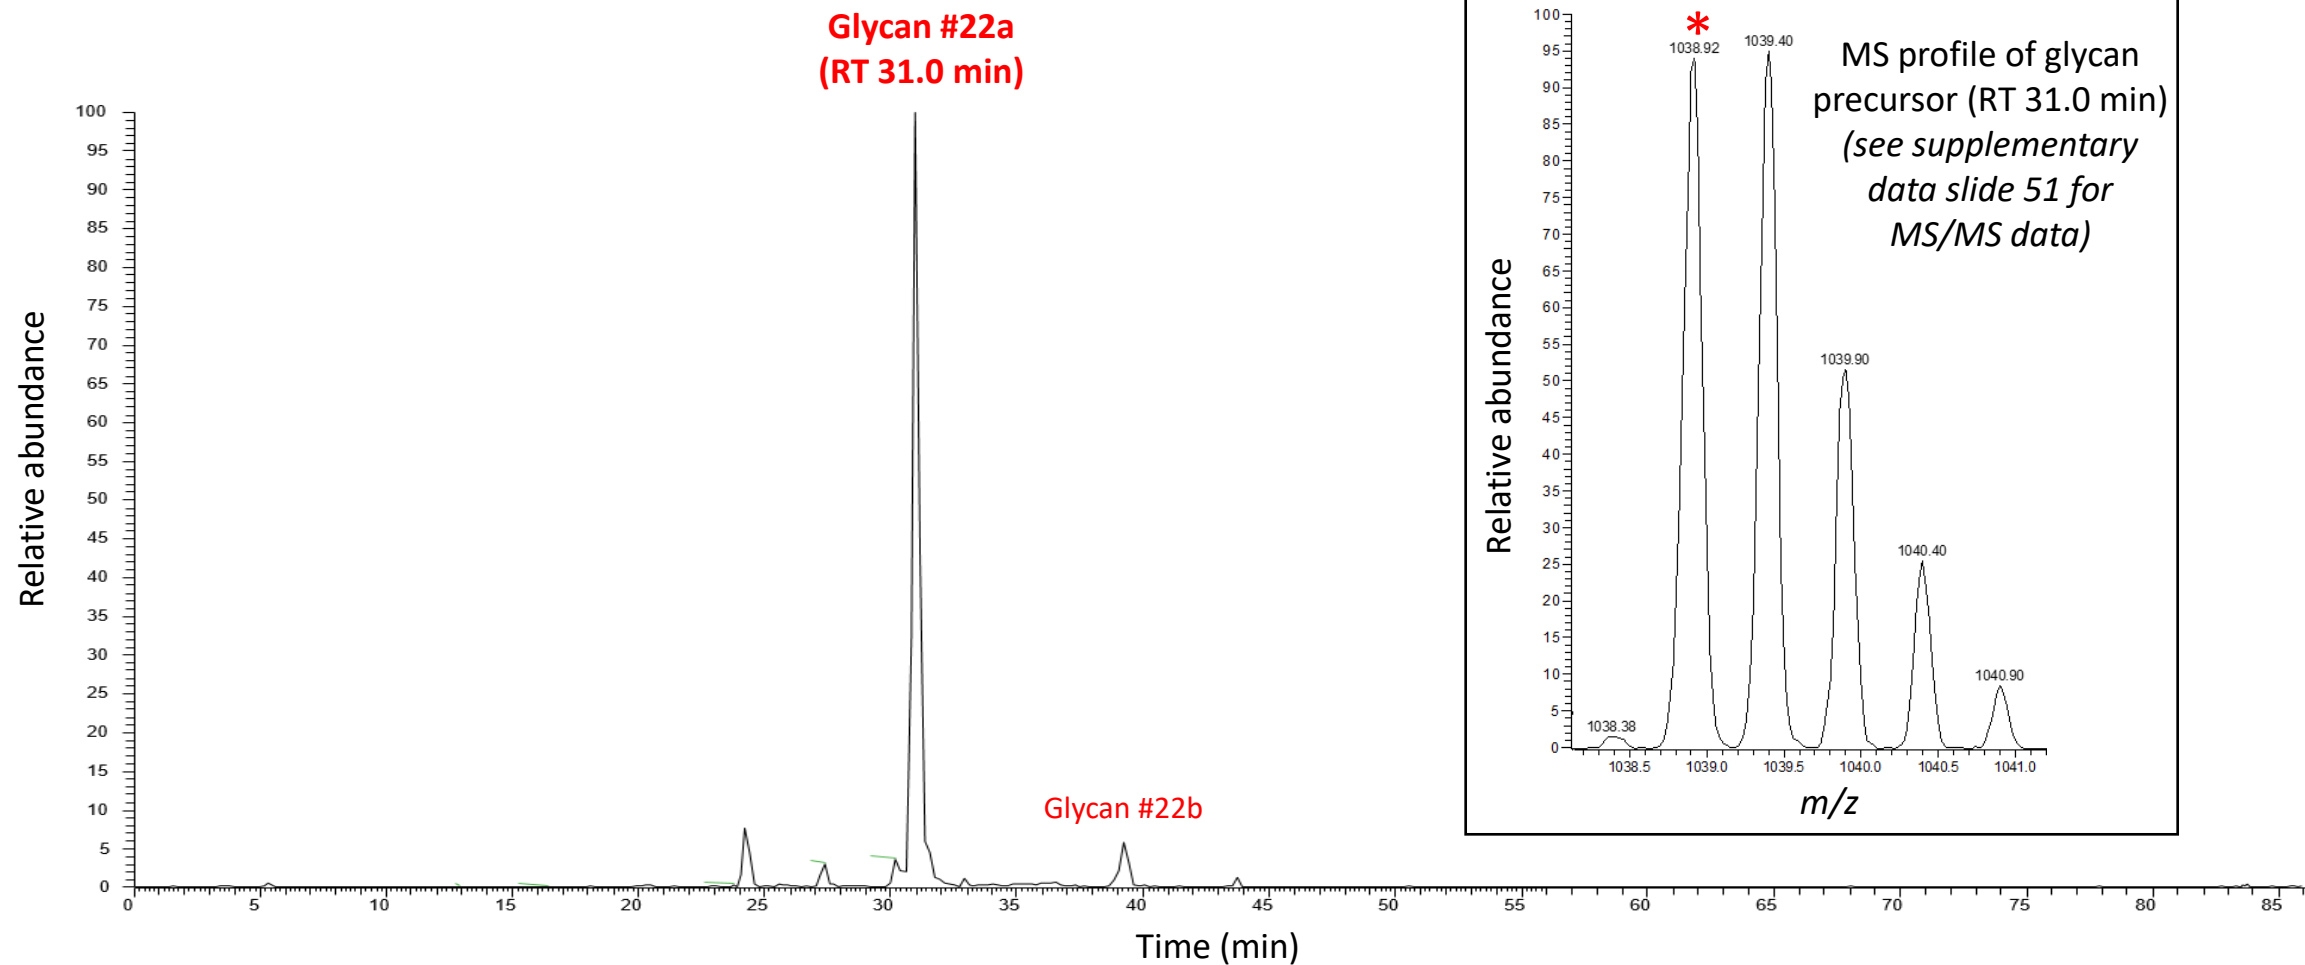

\*Monoisotopic signal of identified glycan

*Pseudomonas aeruginosa* 12  
Extracted Ion Chromatogram  
 $m/z$  913.88

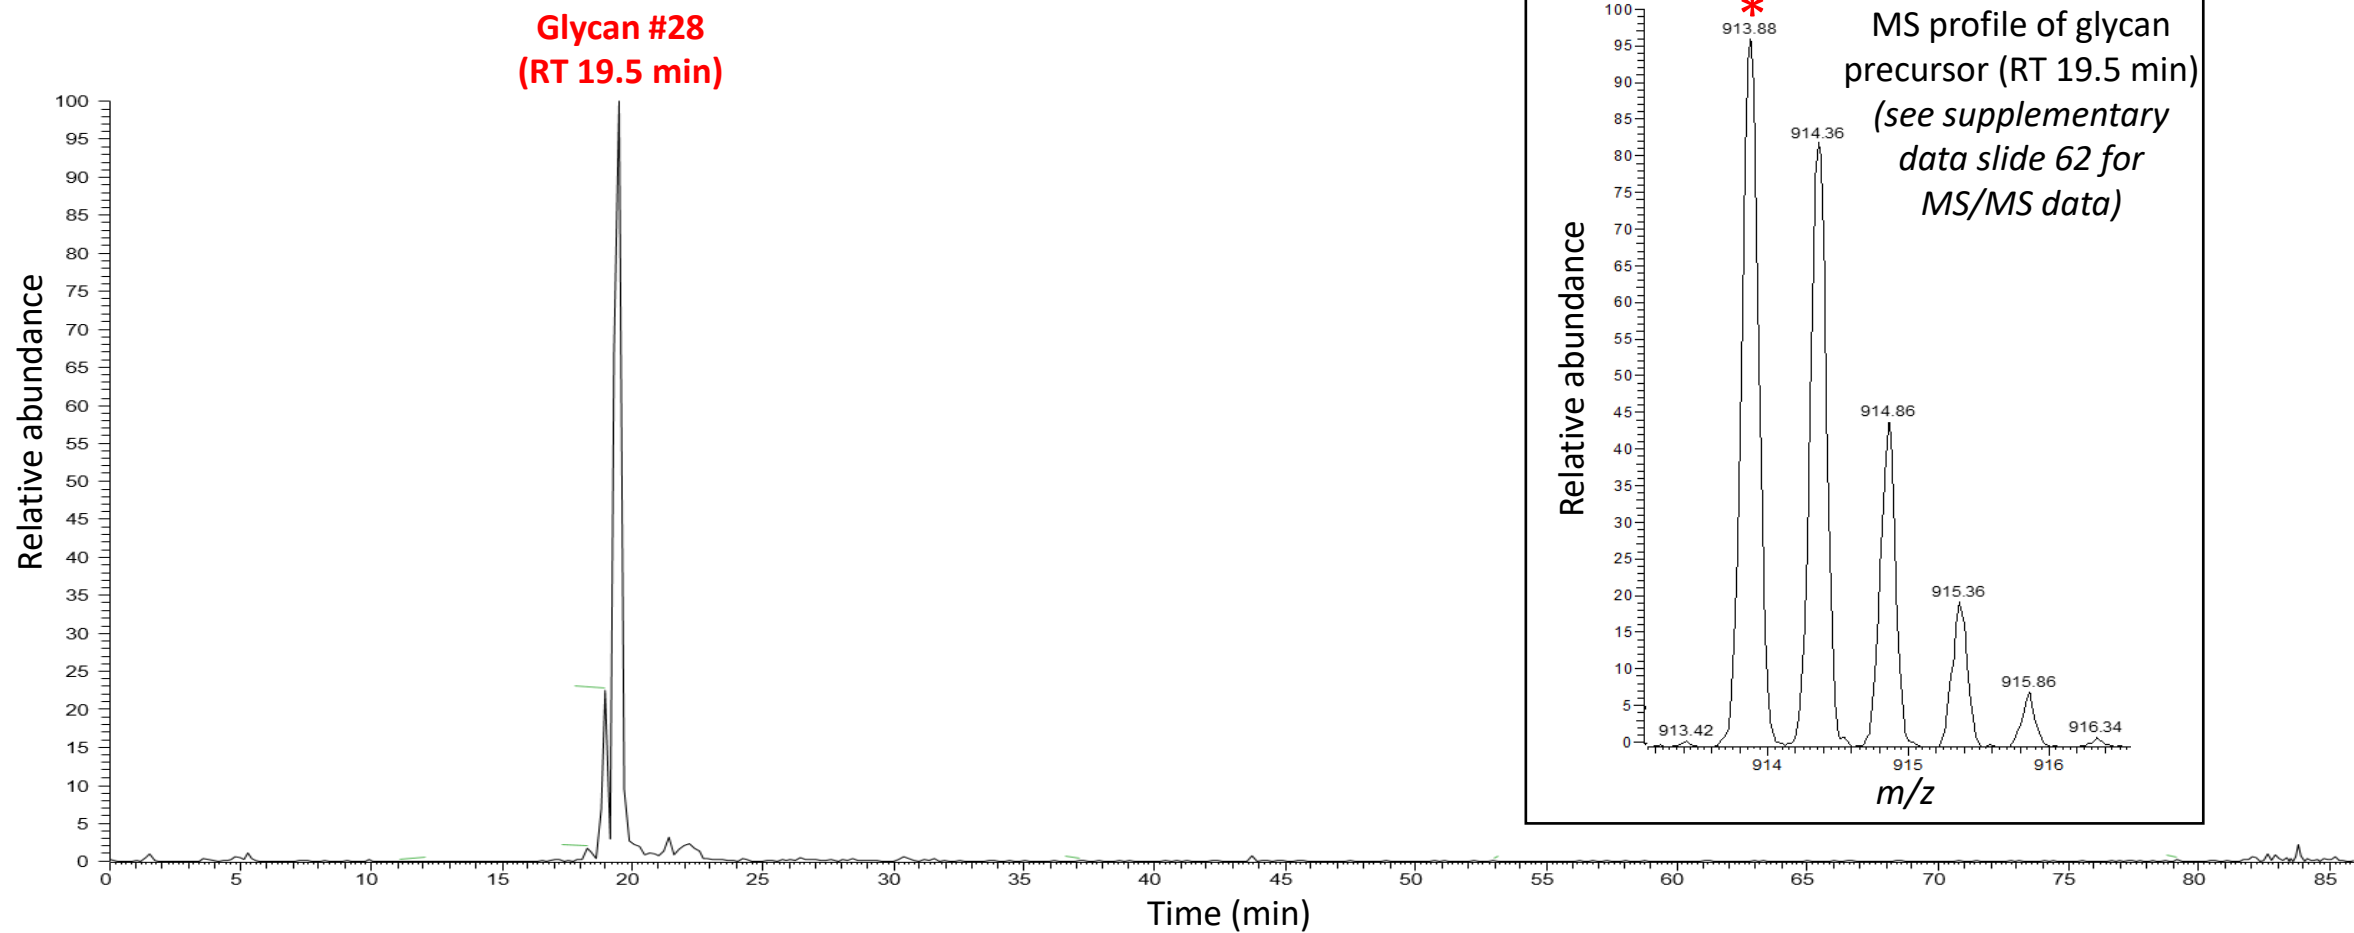

**\*Monoisotopic signal of identified glycan**

*Pseudomonas aeruginosa* 12  
Extracted Ion Chromatogram  
 $m/z$  812.32

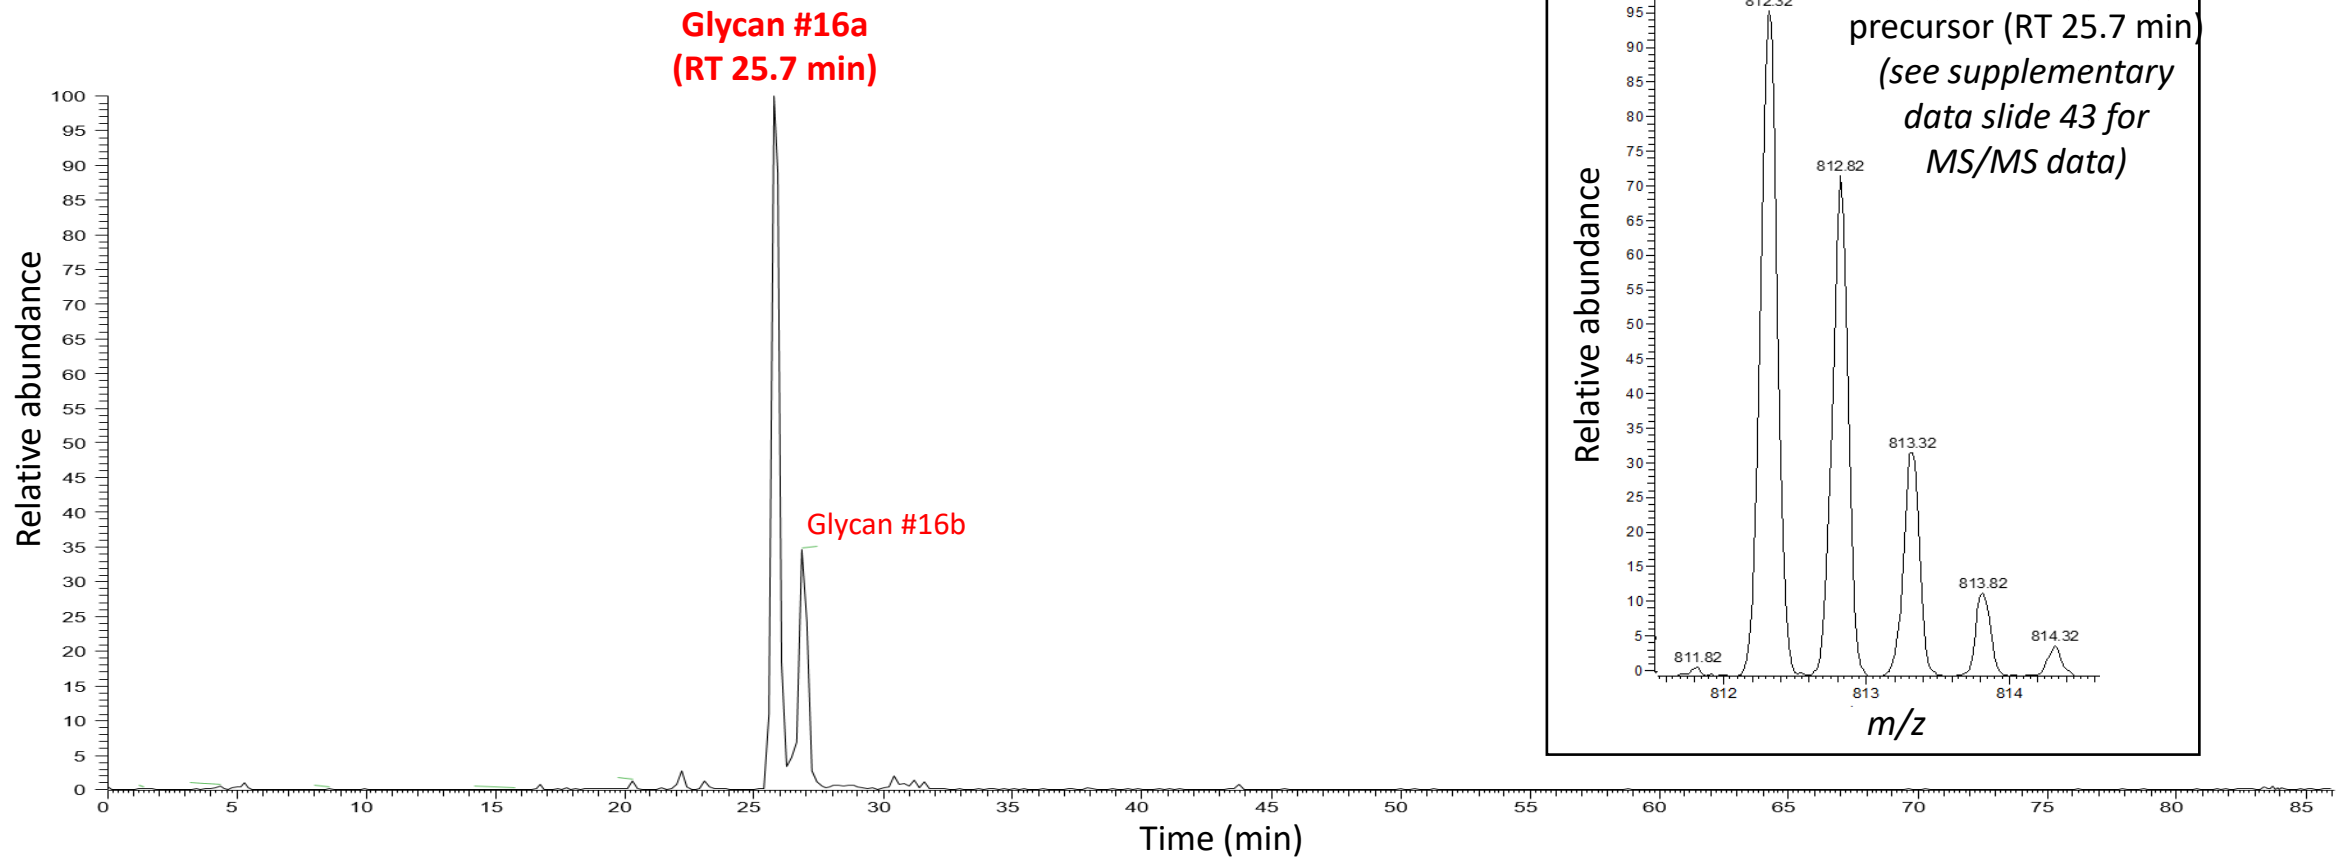

\*Monoisotopic signal of identified glycan



*Pseudomonas aeruginosa* 12  
Extracted Ion Chromatogram  
 $m/z$  893.36

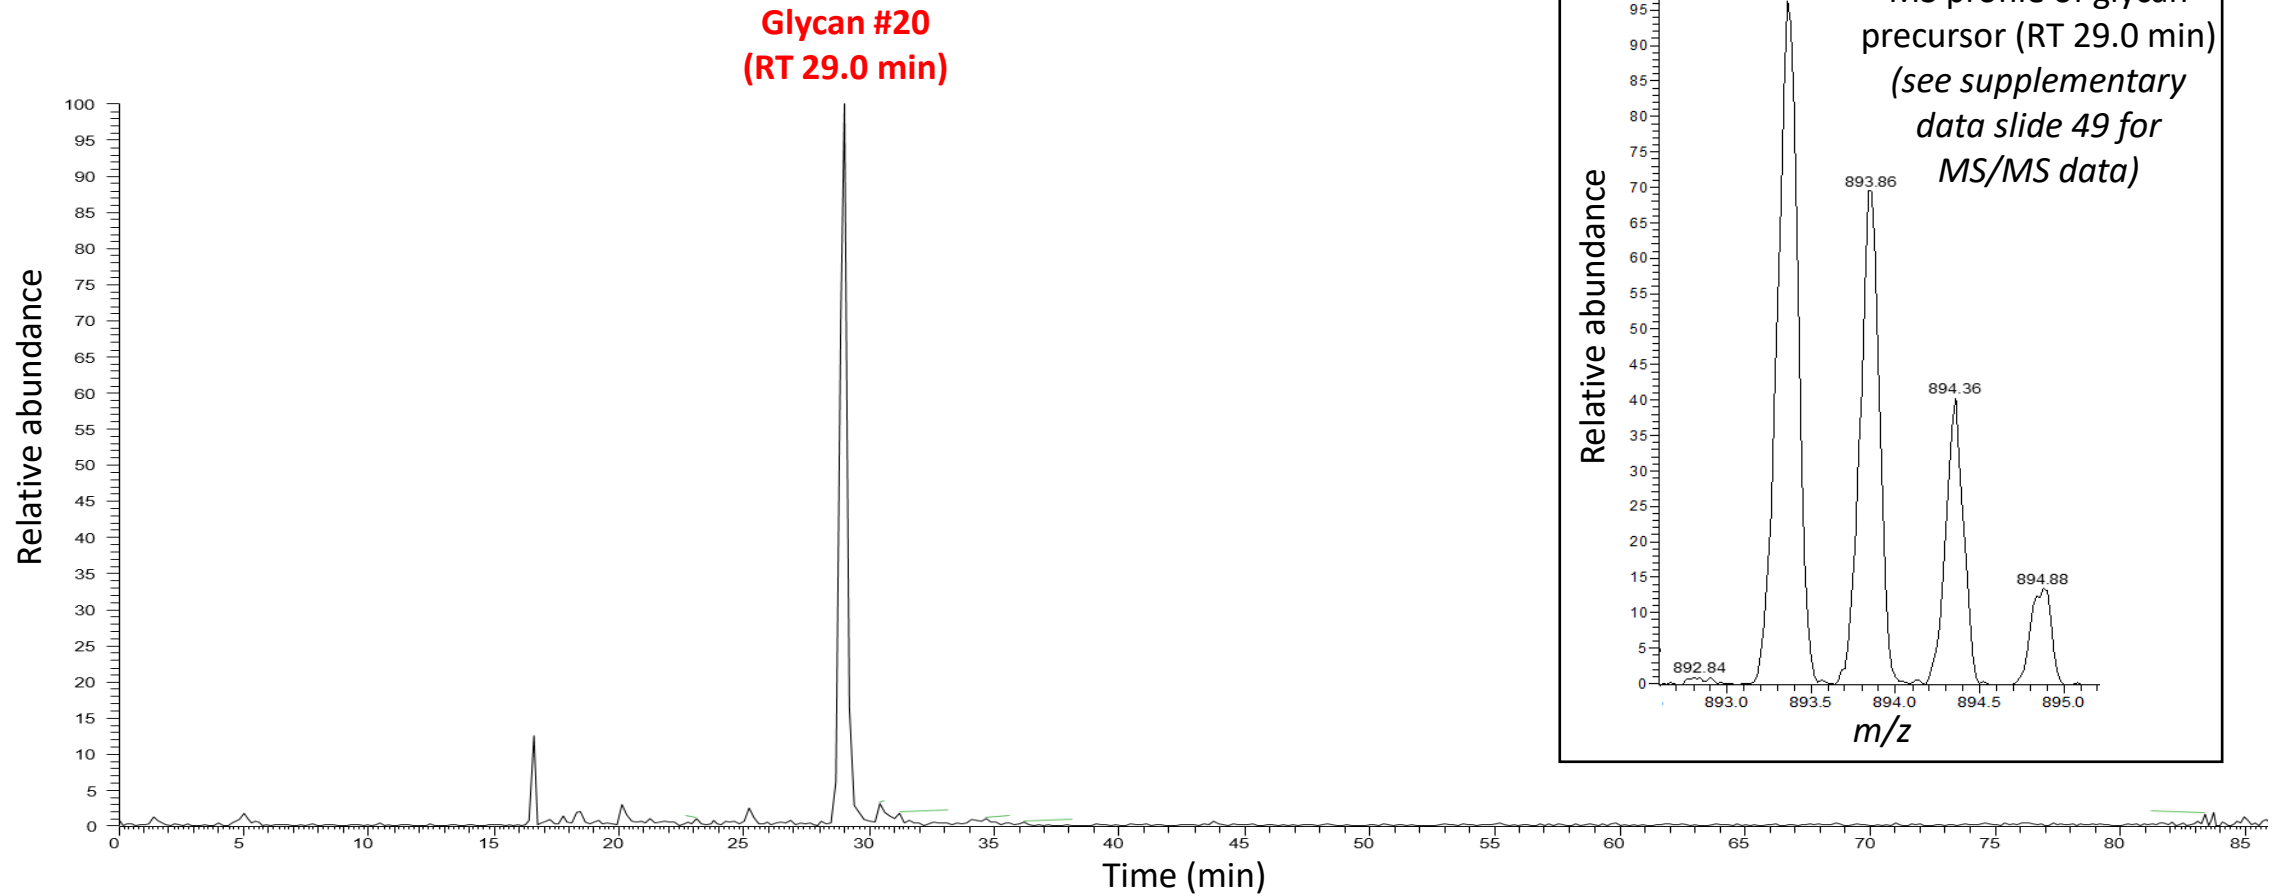

\*Monoisotopic signal of identified glycan

*Pseudomonas aeruginosa* 12  
Extracted Ion Chromatogram  
*m/z* 812.32

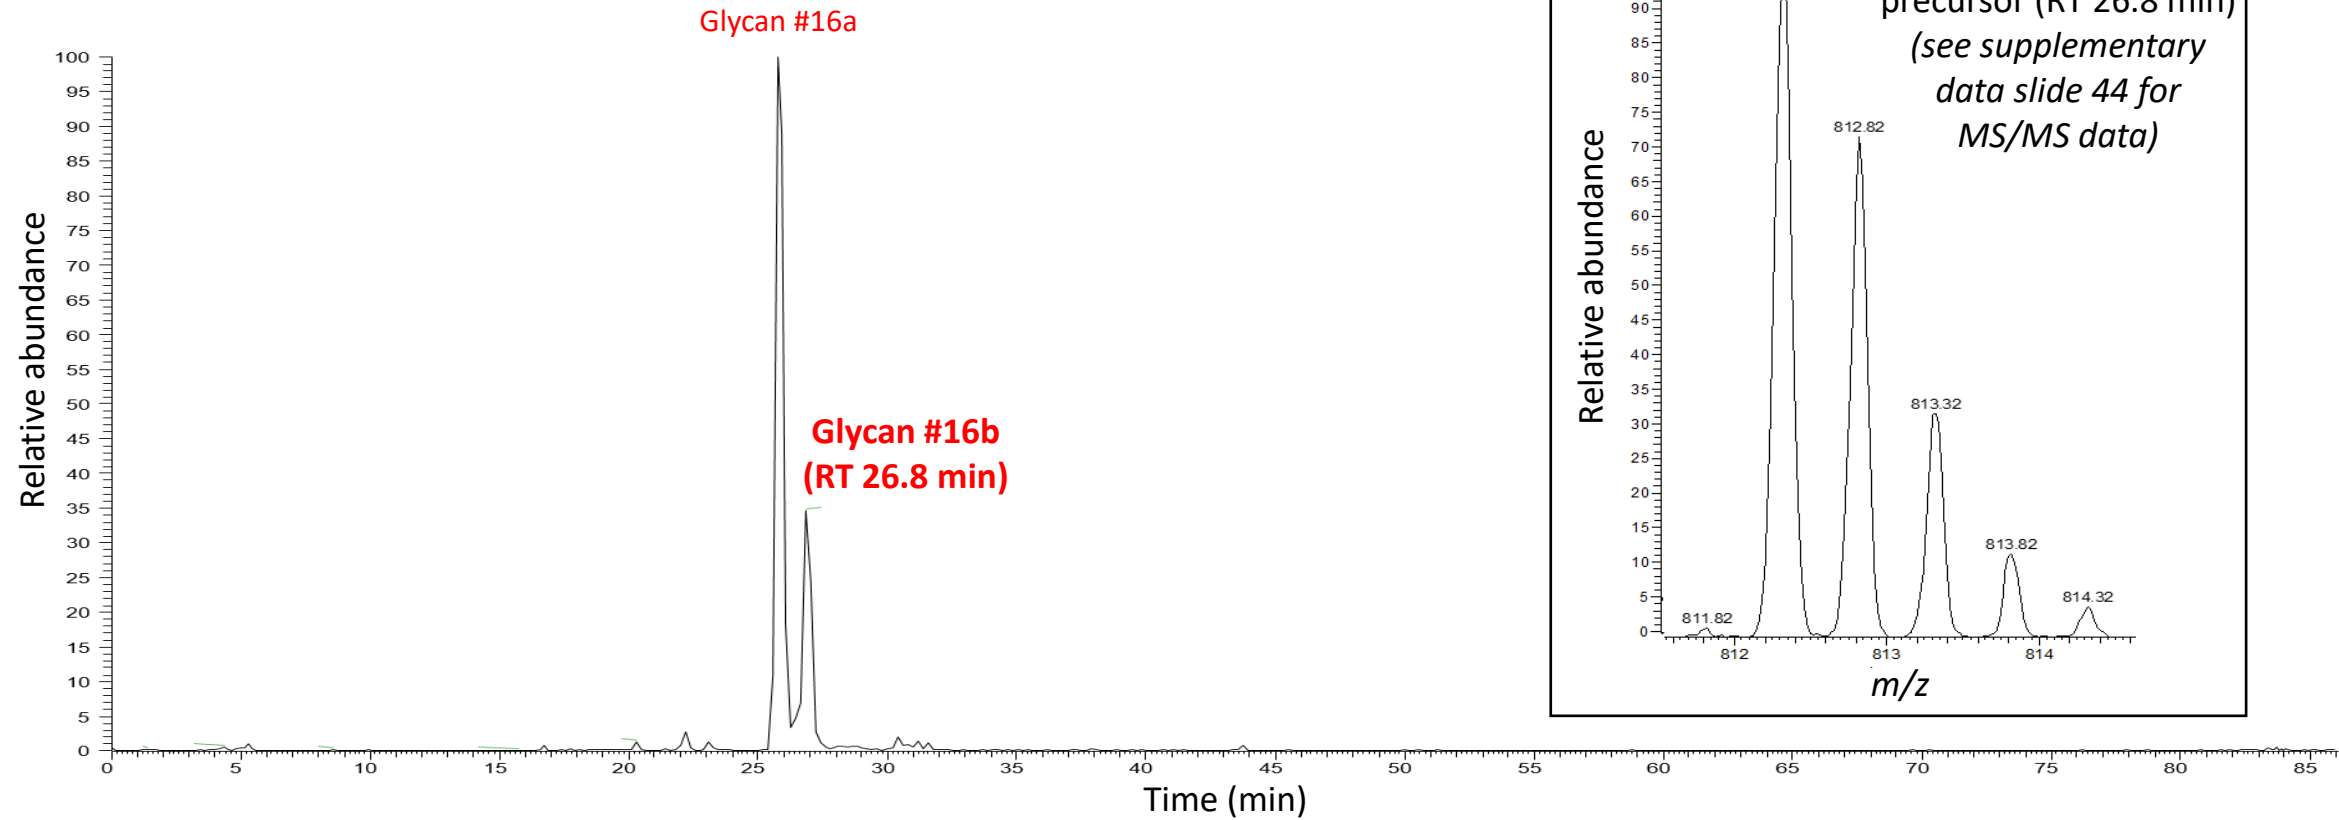

\*Monoisotopic signal of identified glycan

*Pseudomonas aeruginosa* 12  
Extracted Ion Chromatogram  
*m/z* 957.88

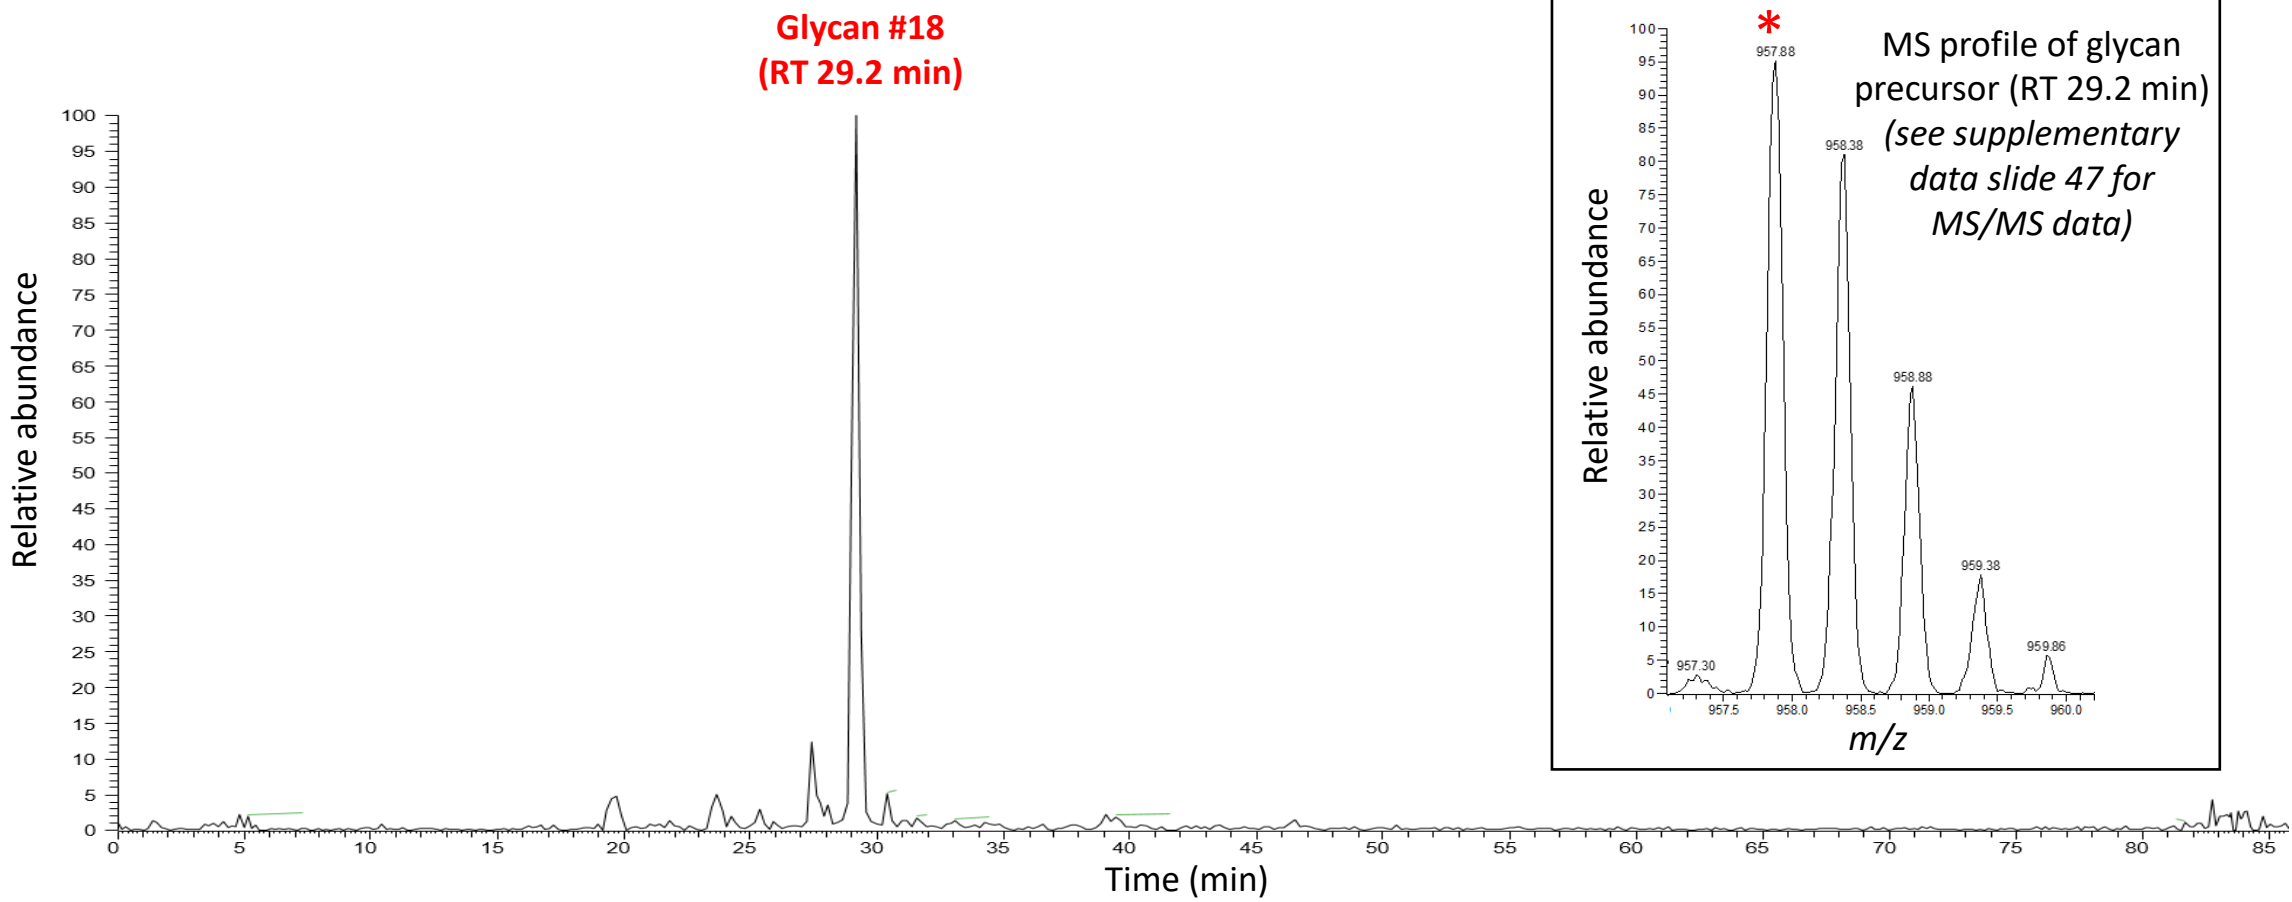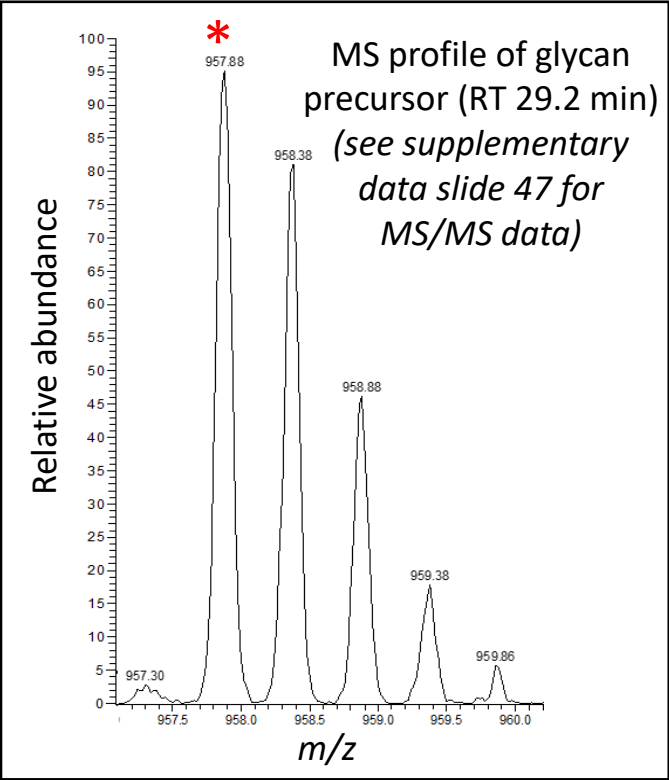

**\*Monoisotopic signal of identified glycan**

## **Supplementary Data S2**

Examples of EICs, S/N and manually annotated PGC-LC-ESI-CID-MS (-) spectra of very low abundant *N*-glycans (alditols) released from bacteremic sera (0.01%-0.15% relative abundance levels)

*Escherichia coli* 8  
Extracted Ion Chromatogram  
 $m/z$  1022.42

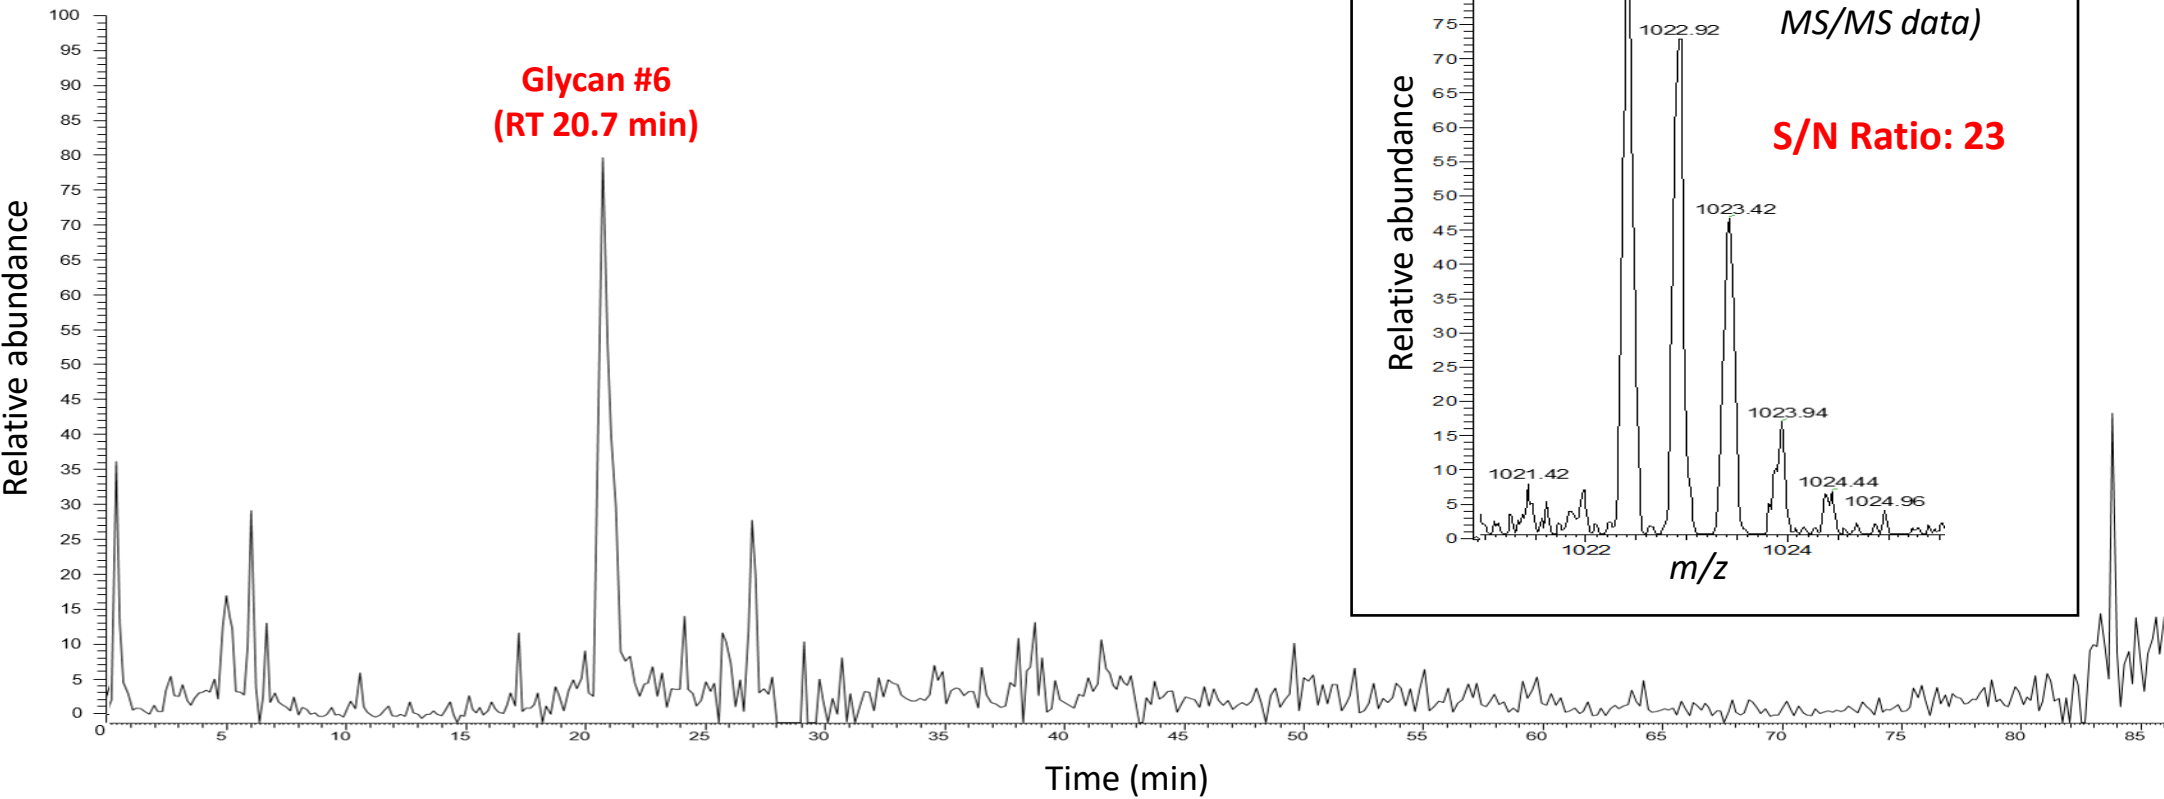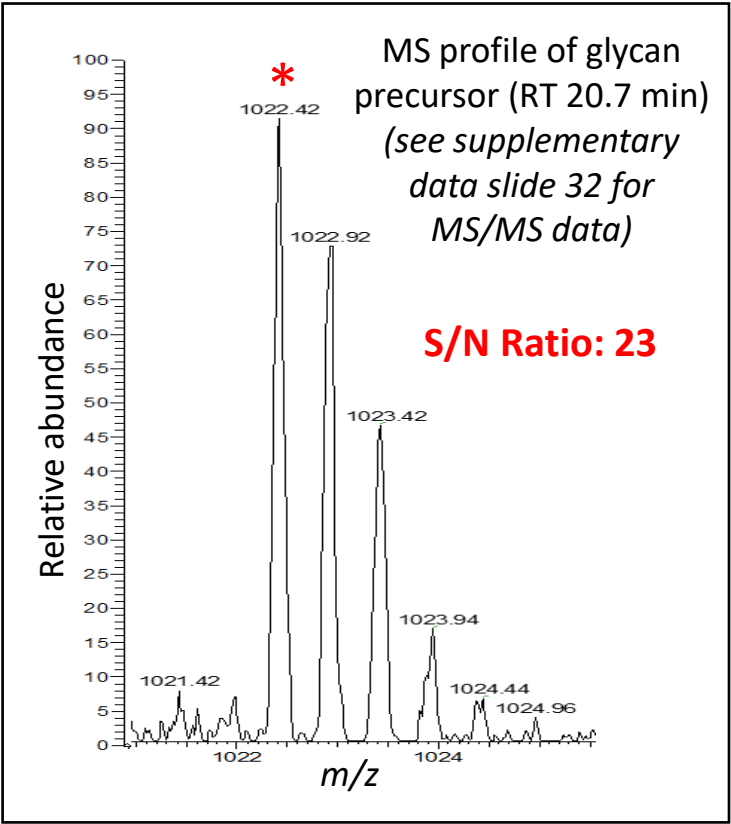

**\*Monoisotopic signal of identified glycan**

*Staphylococcus aureus* 17  
Extracted Ion Chromatogram  
 $m/z$  718.76

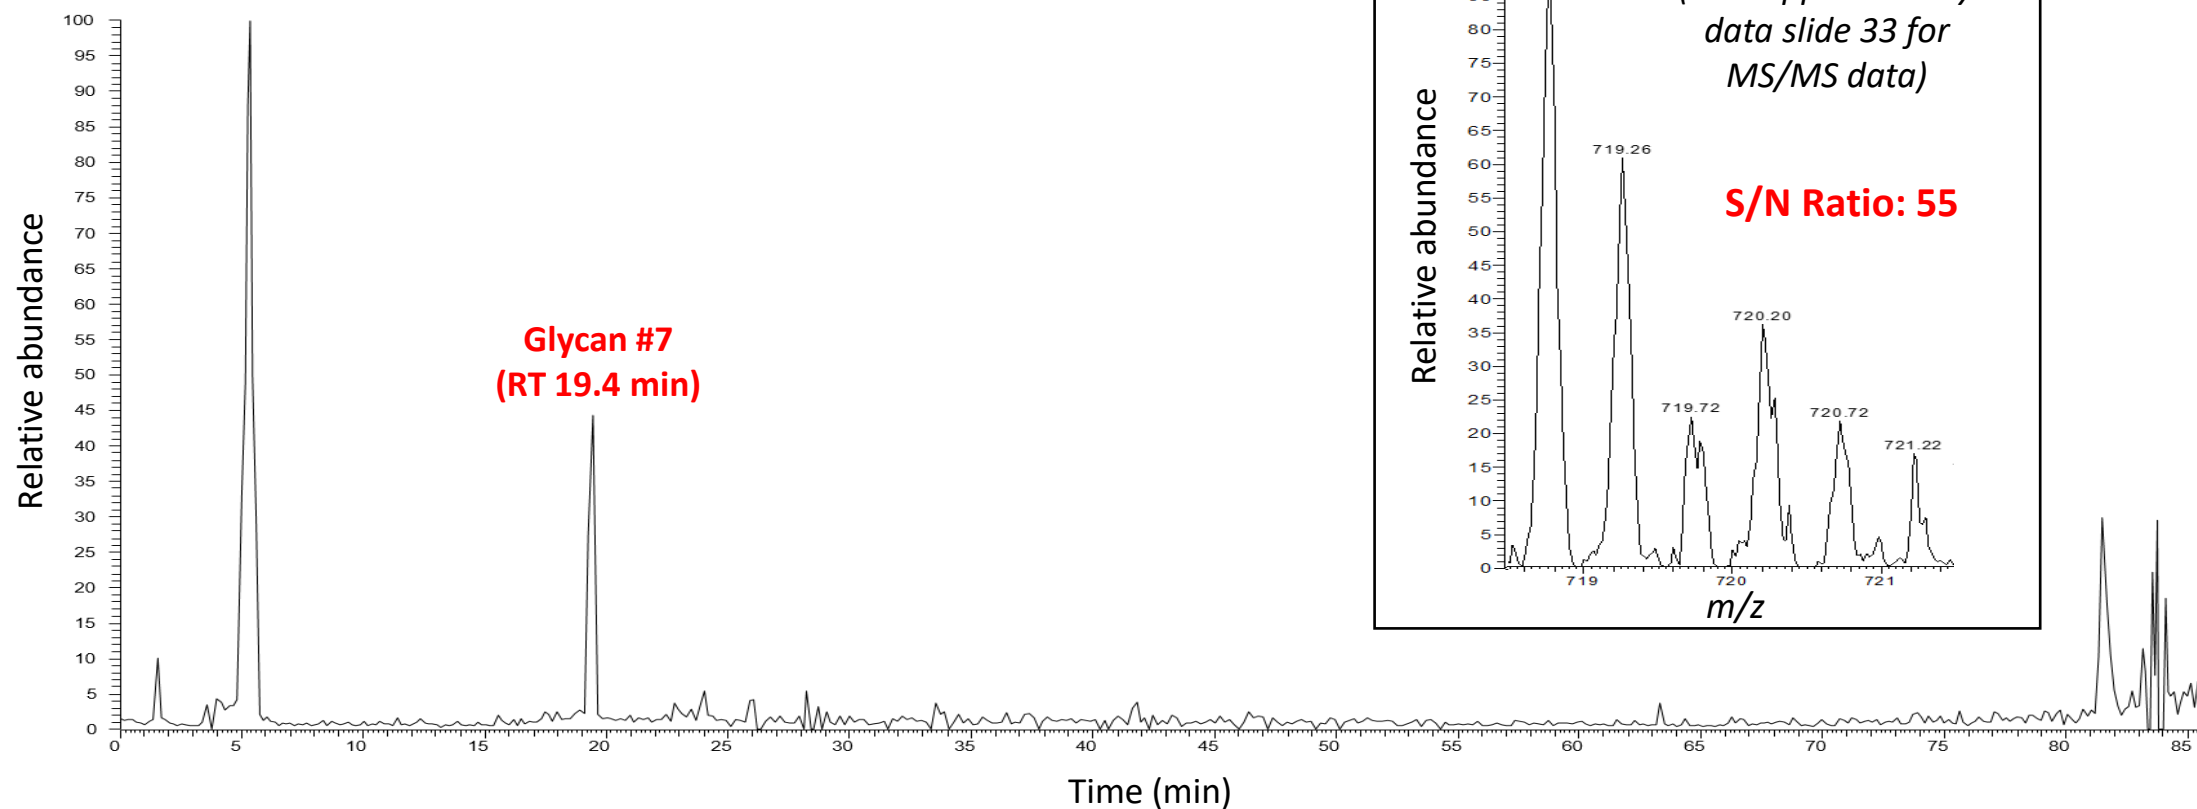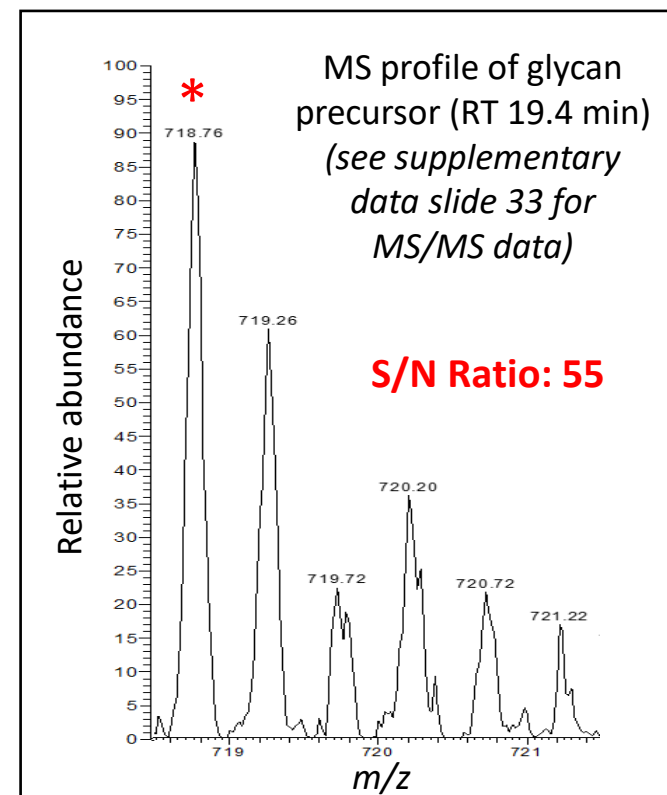

**\*Monoisotopic signal of identified glycan**

*Streptococcus viridans* 29  
Extracted Ion Chromatogram  
 $m/z$  1213.00

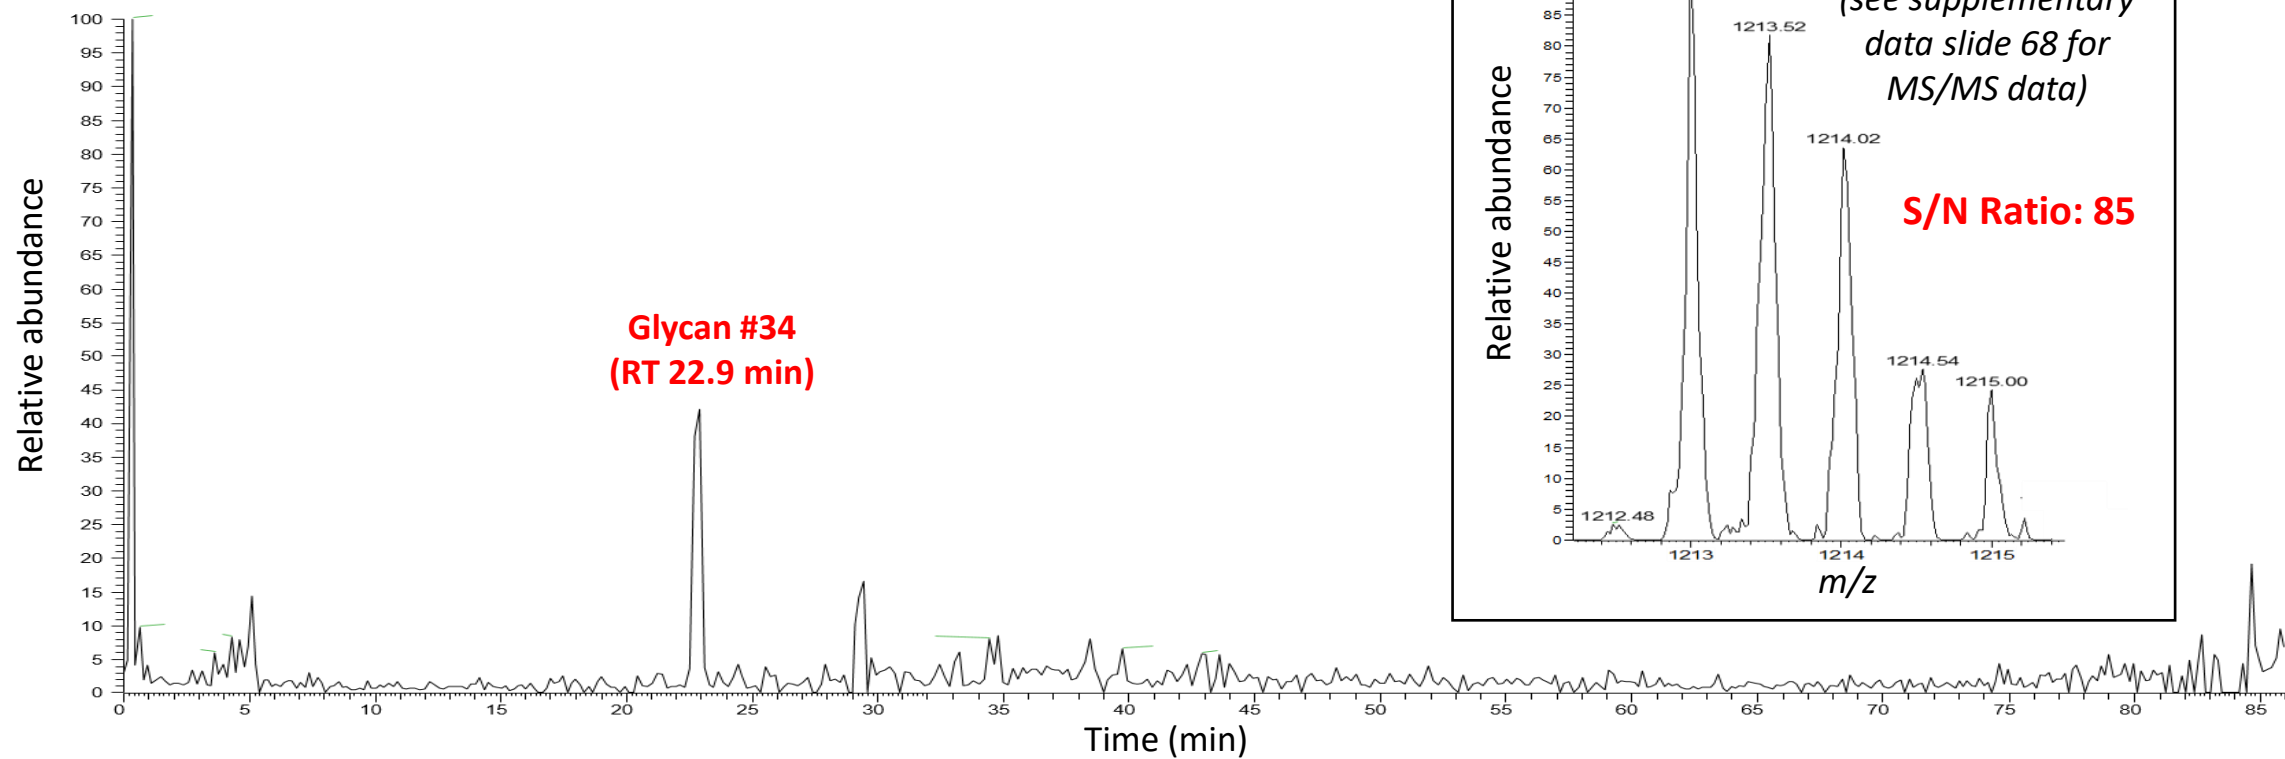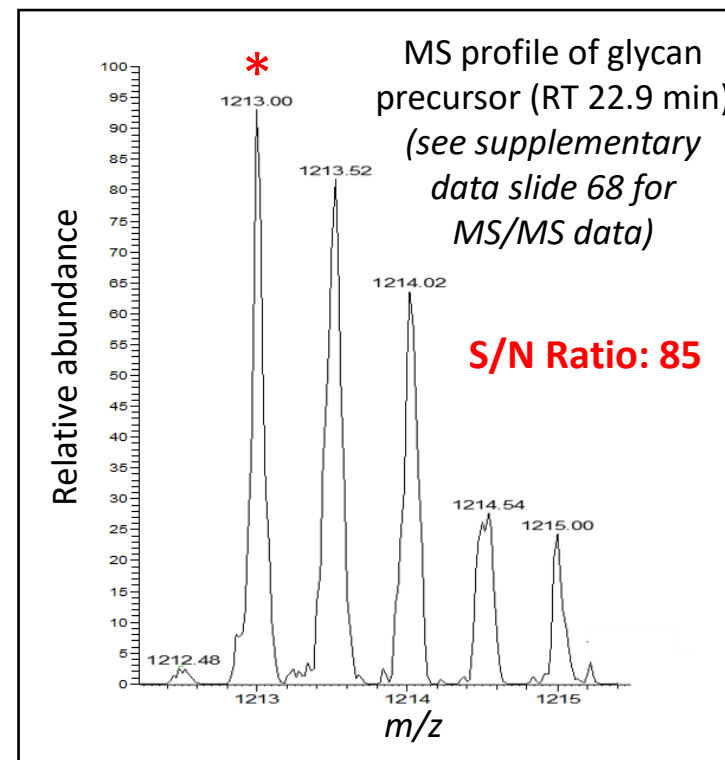

**\*Monoisotopic signal of identified glycan**

*Pseudomonas aeruginosa* 13  
Extracted Ion Chromatogram  
*m/z* 1294.02

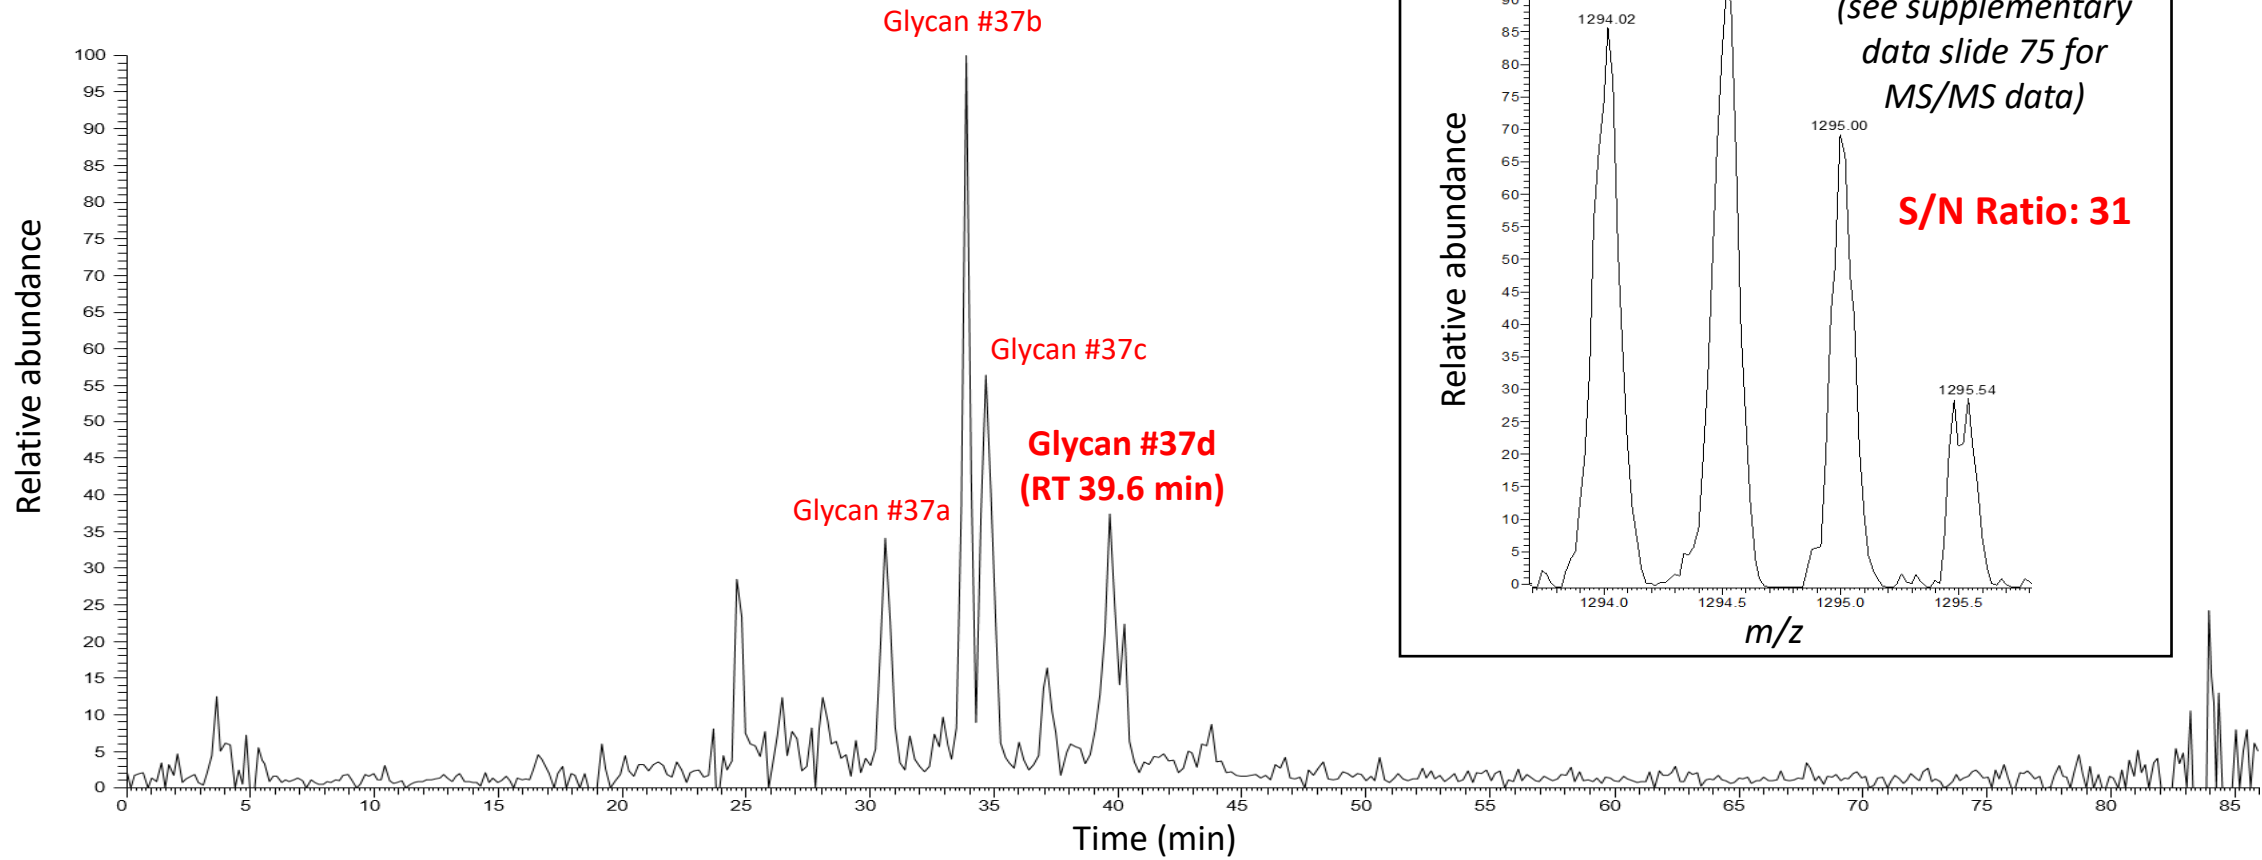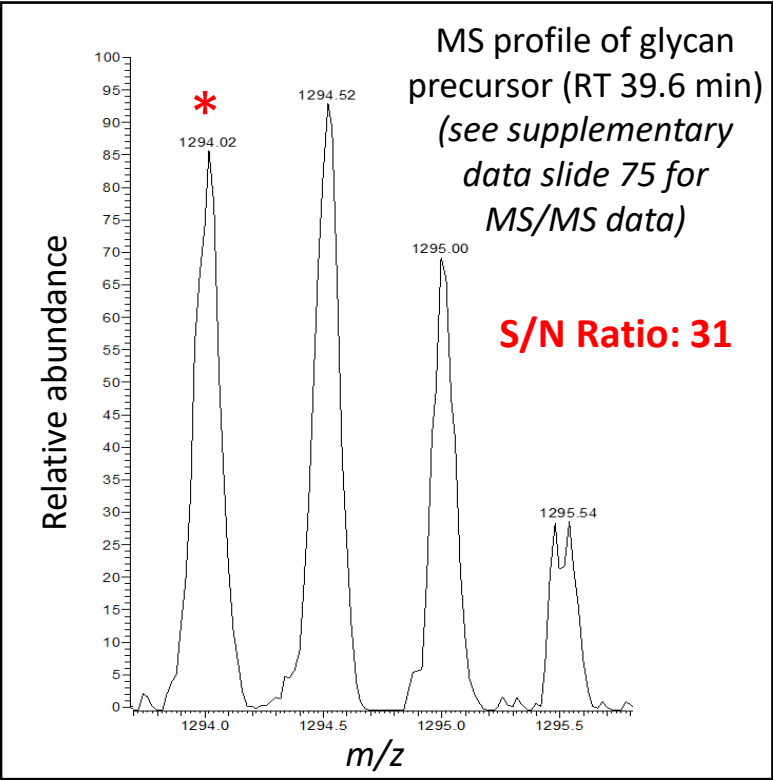

\*Monoisotopic signal of identified glycan



*Staphylococcus aureus* 17  
Extracted Ion Chromatogram  
 $m/z$  1512.60

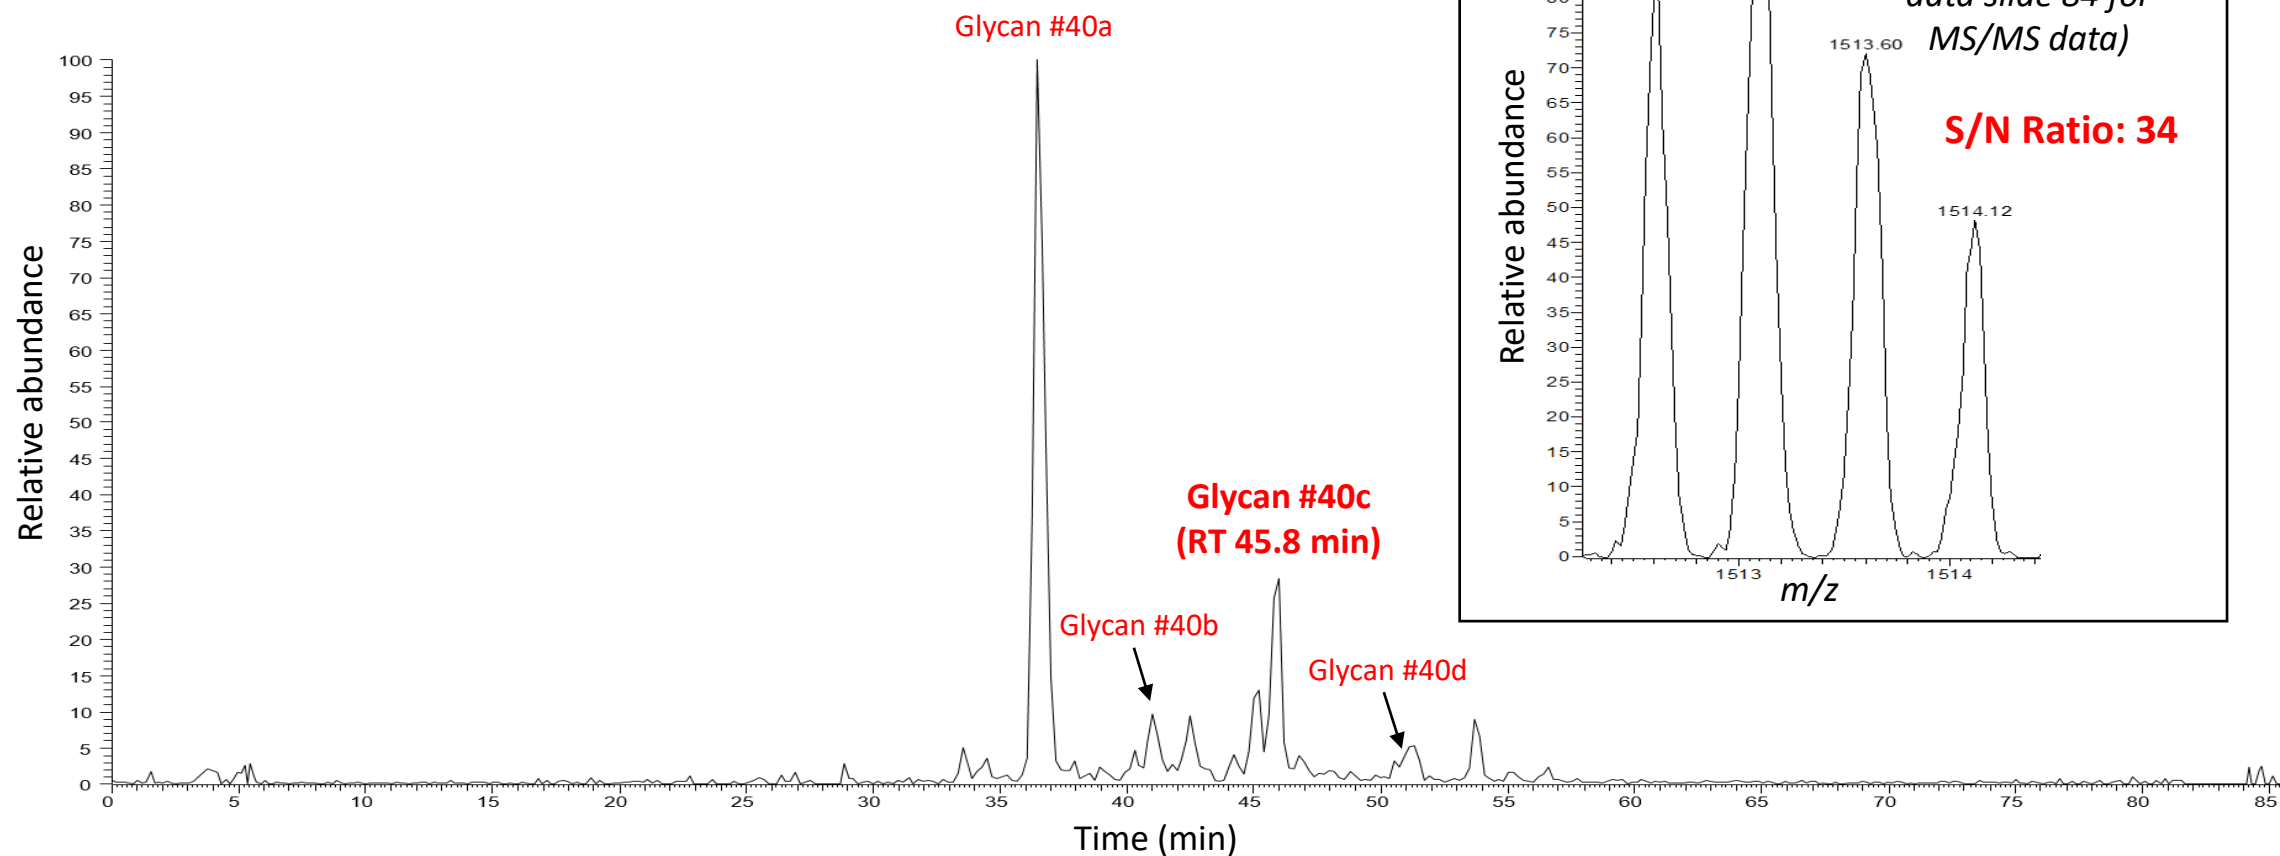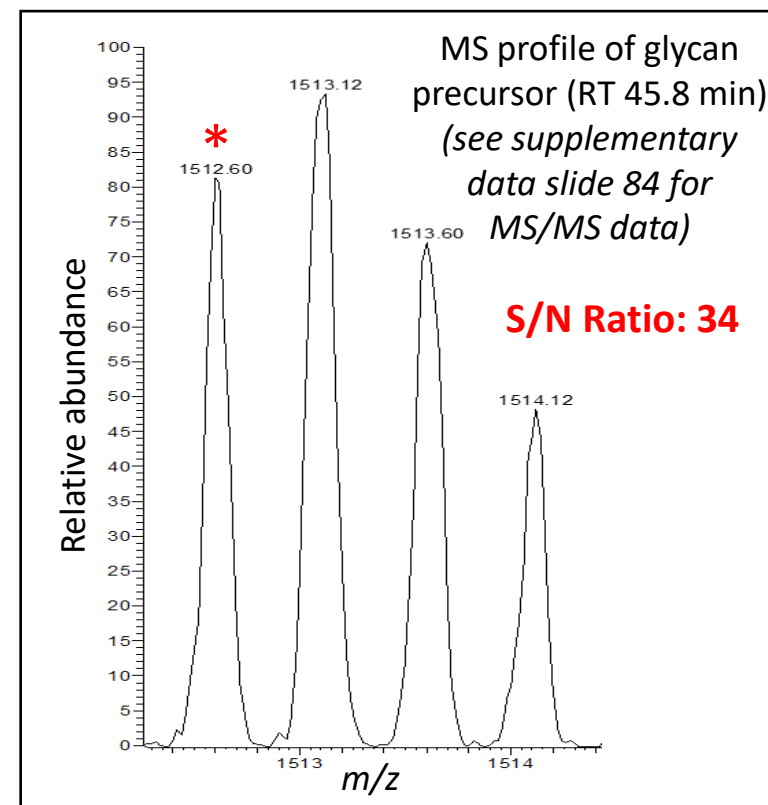

\*Monoisotopic signal of identified glycan

## **Supplementary Data S3**

Manually annotated PGC-LC-ESI-CID-MS/MS (-)  
spectra of all reported *N*-glycans (alditols) released  
from bacteremic and healthy sera

# Glycan #1

Observed  $m/z$  1235.48 (1-), RT: ~23.4 min  
[M-H]<sup>-</sup> 1235.48 Da

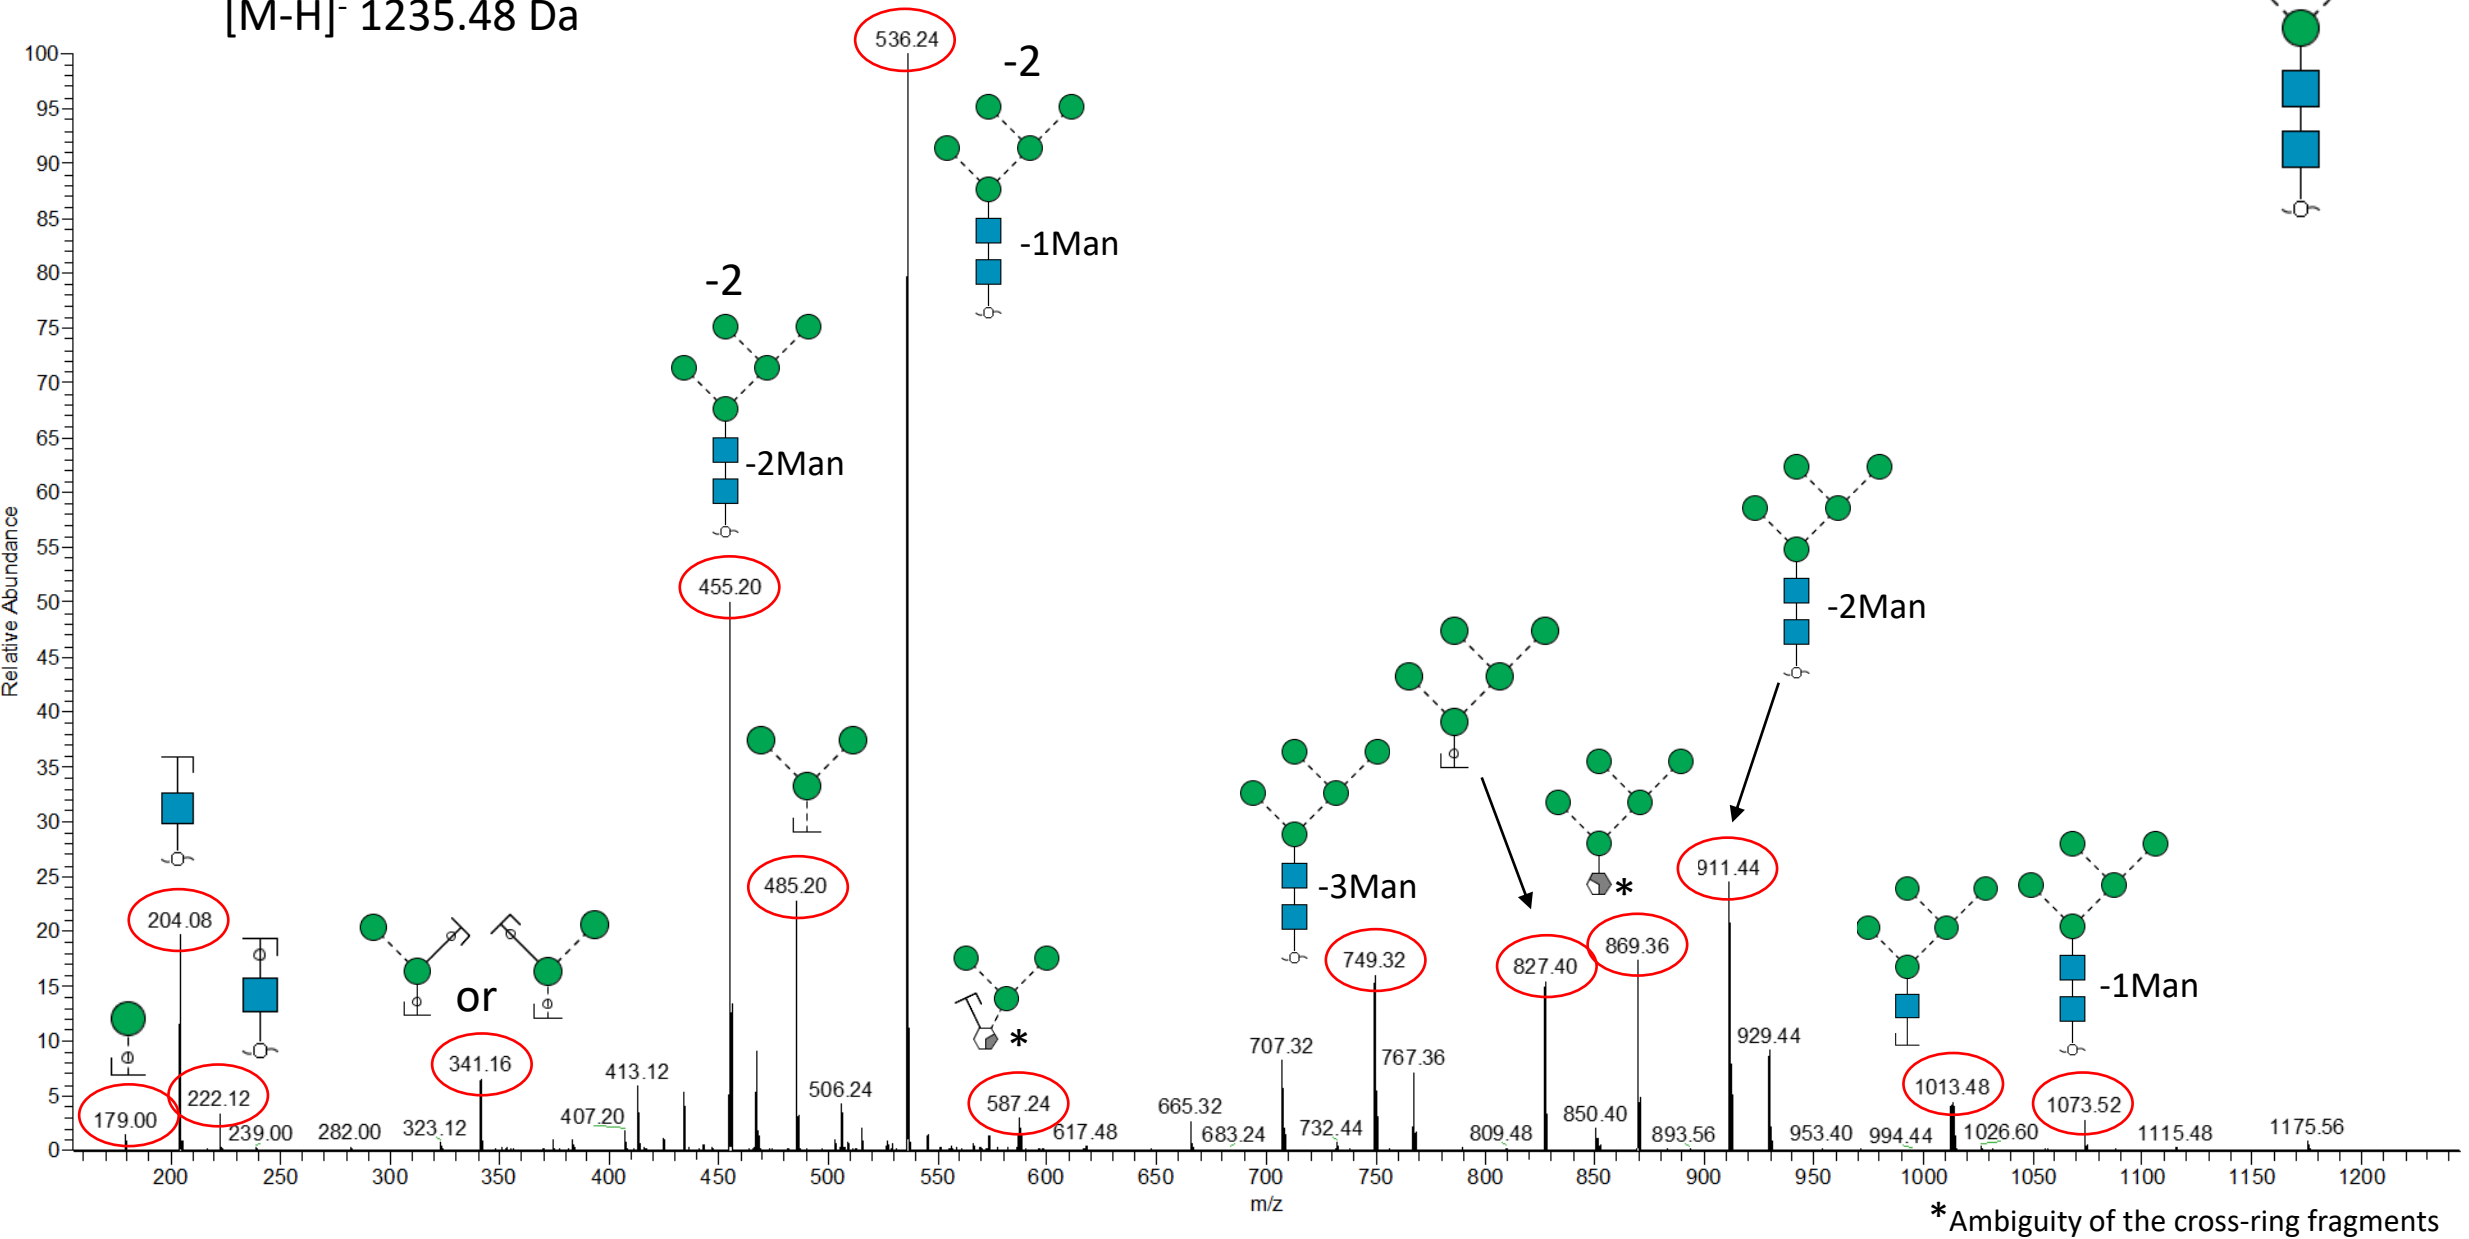

## Glycan #2

Observed  $m/z$  698.26 (2-), RT: ~19.3 min

$[M-H]^-$  1397.49 Da

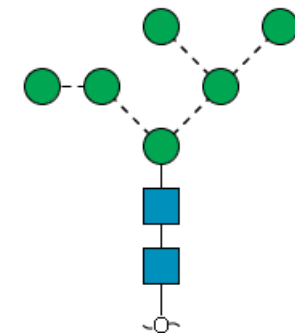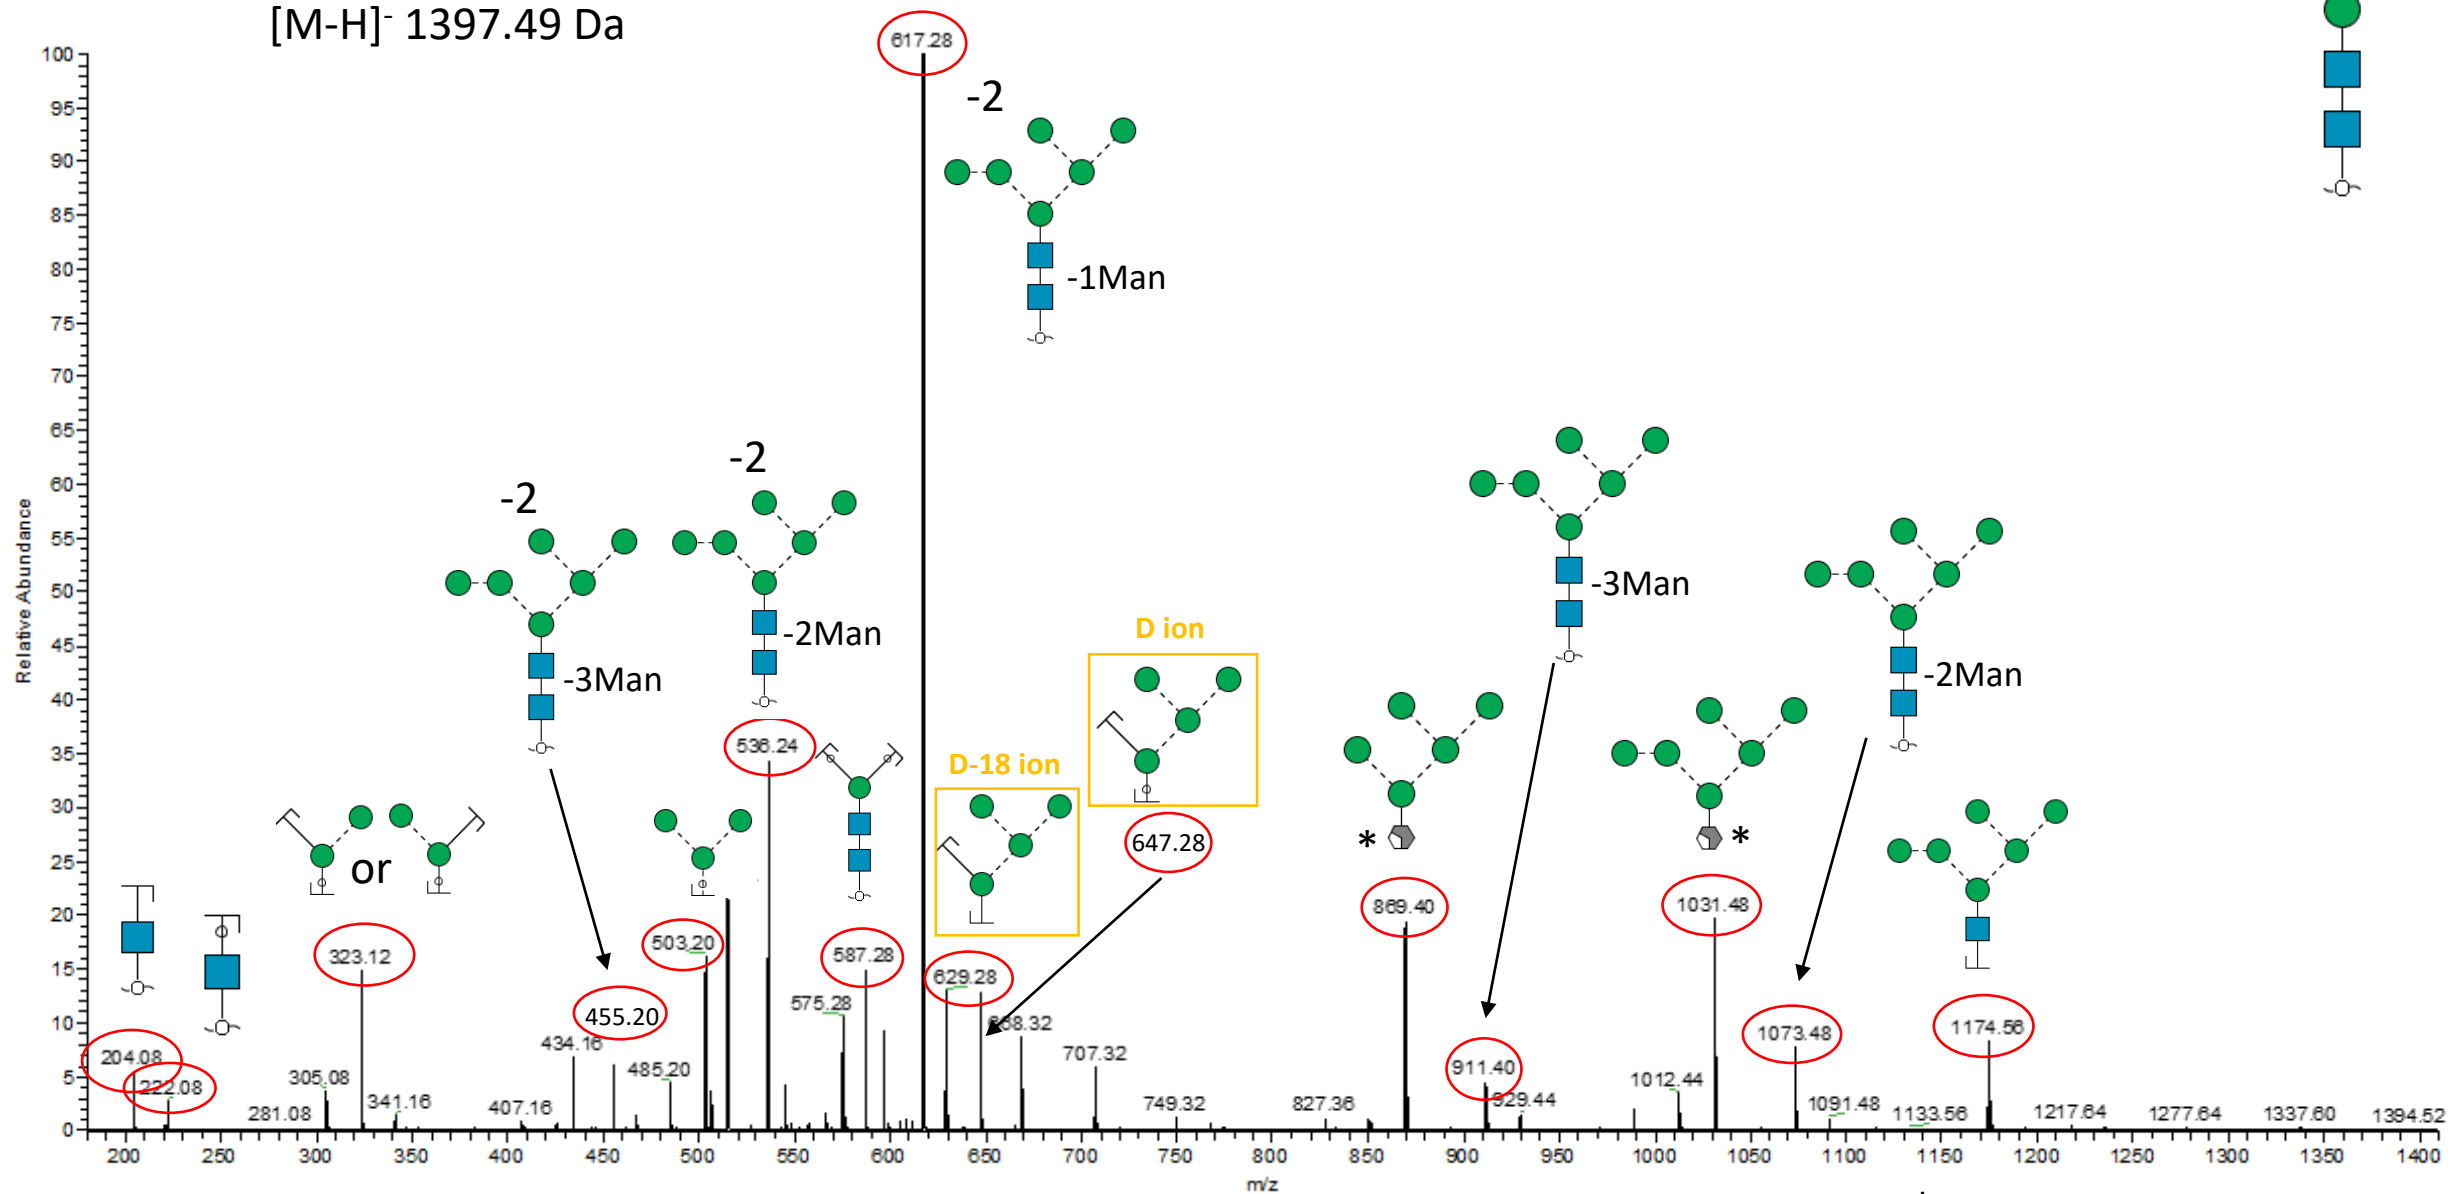

\* Ambiguity of the cross-ring fragments

## Glycan #3

Observed  $m/z$  779.30 (2-), RT: ~18.9 min

$[M-H]^-$  1559.54 Da

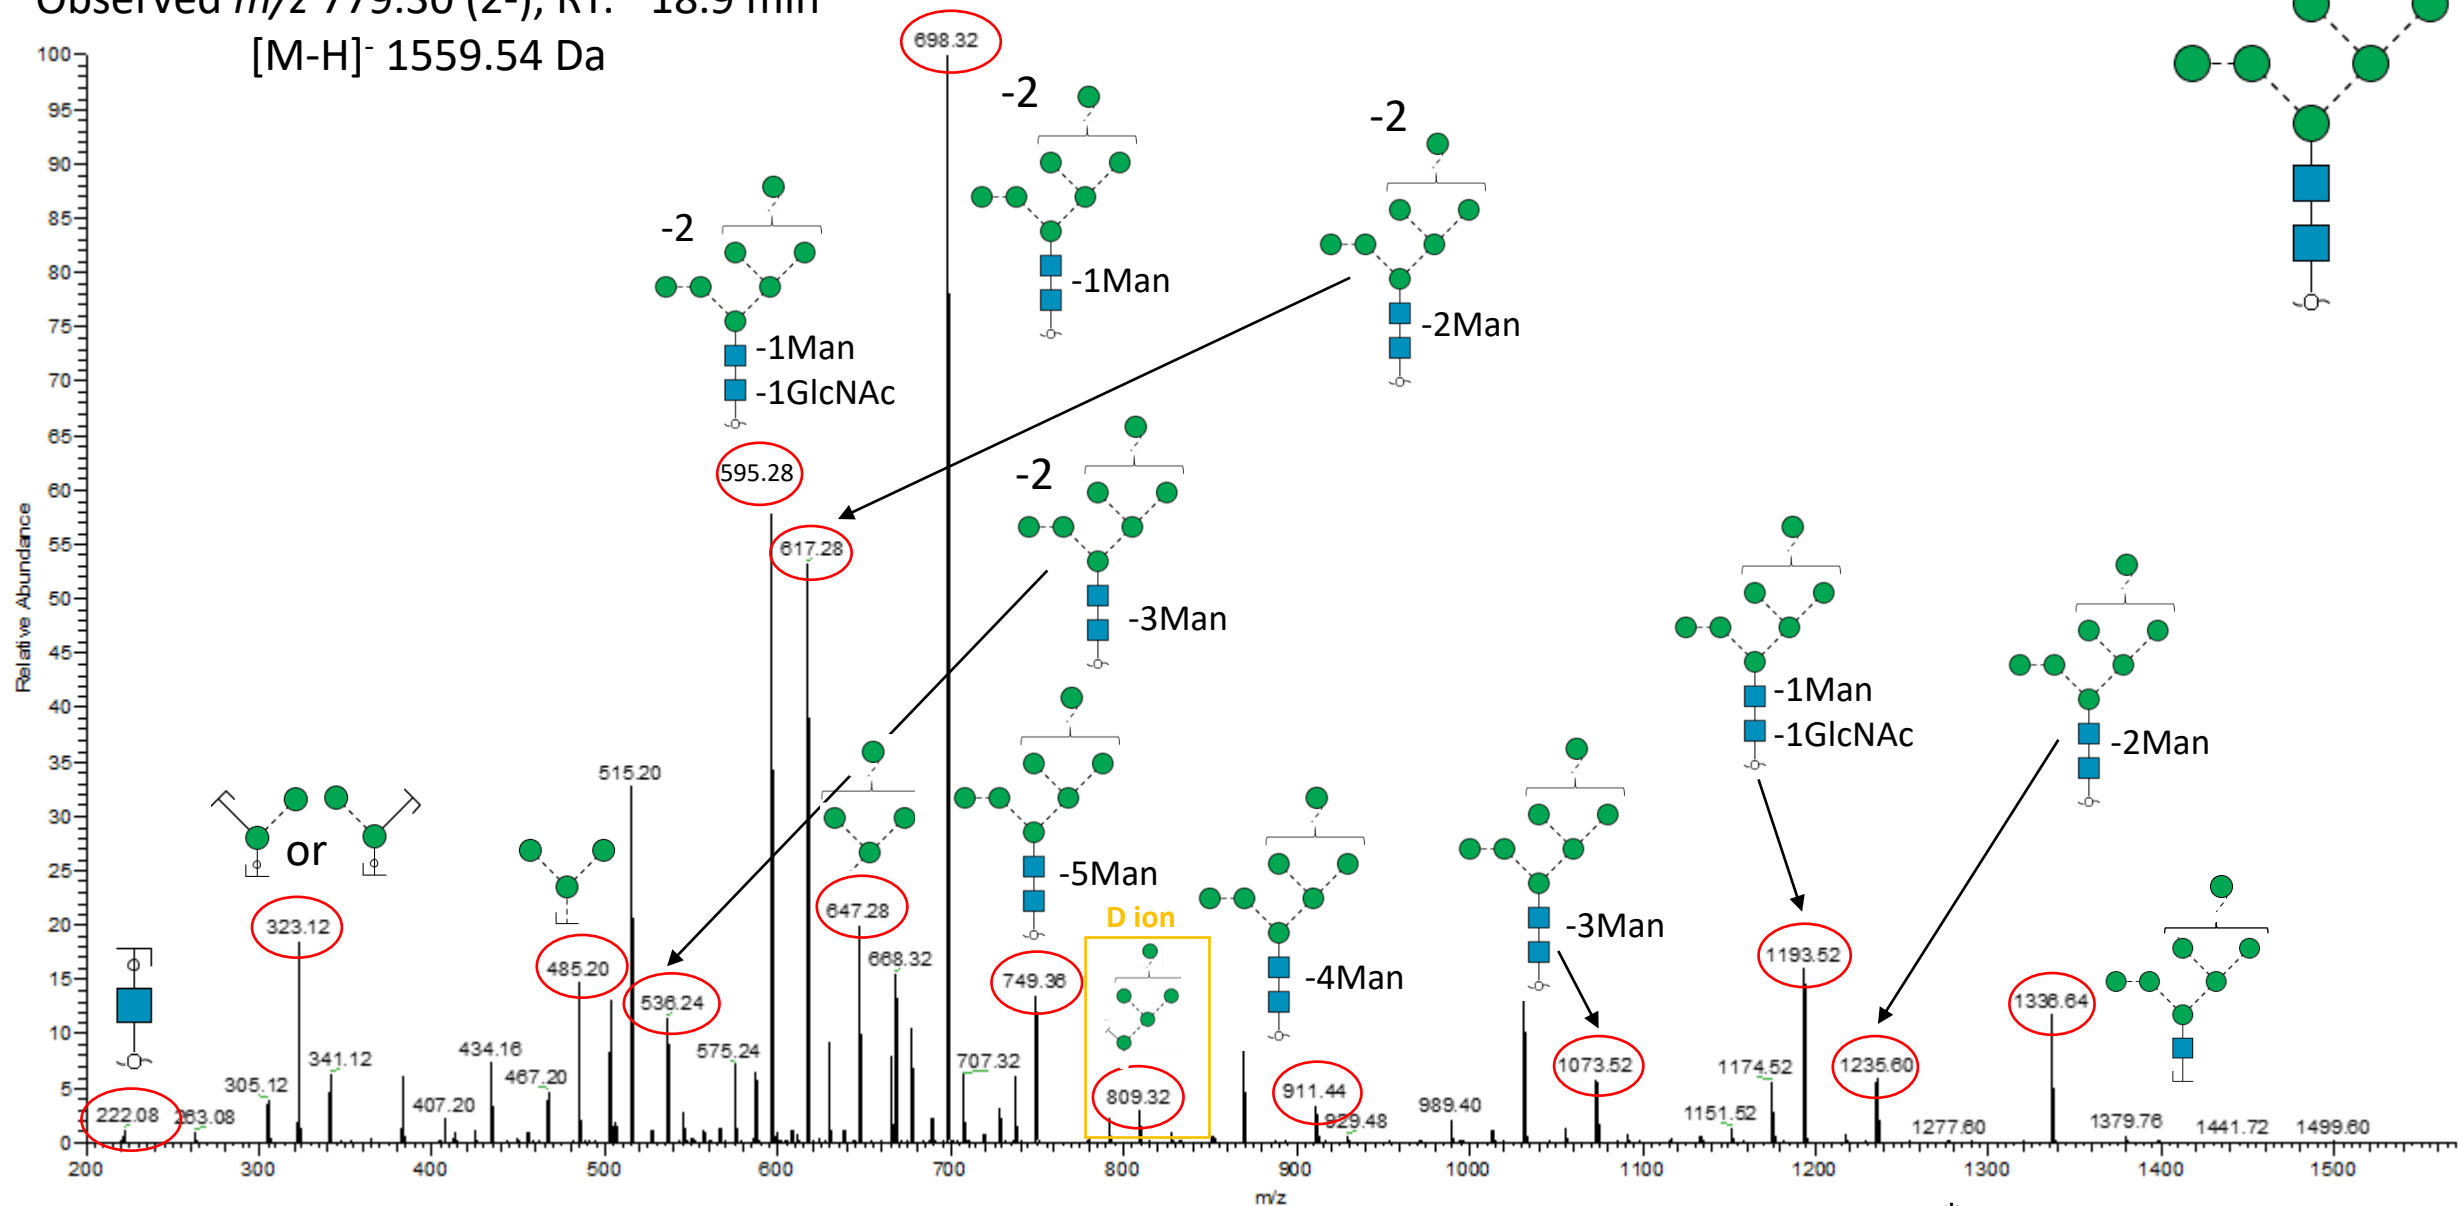

\* Ambiguity of the cross-ring fragments

# Glycan #4

Observed  $m/z$  860.29 (2-), RT: ~19.4 min

$[M-H]^-$  1721.60 Da

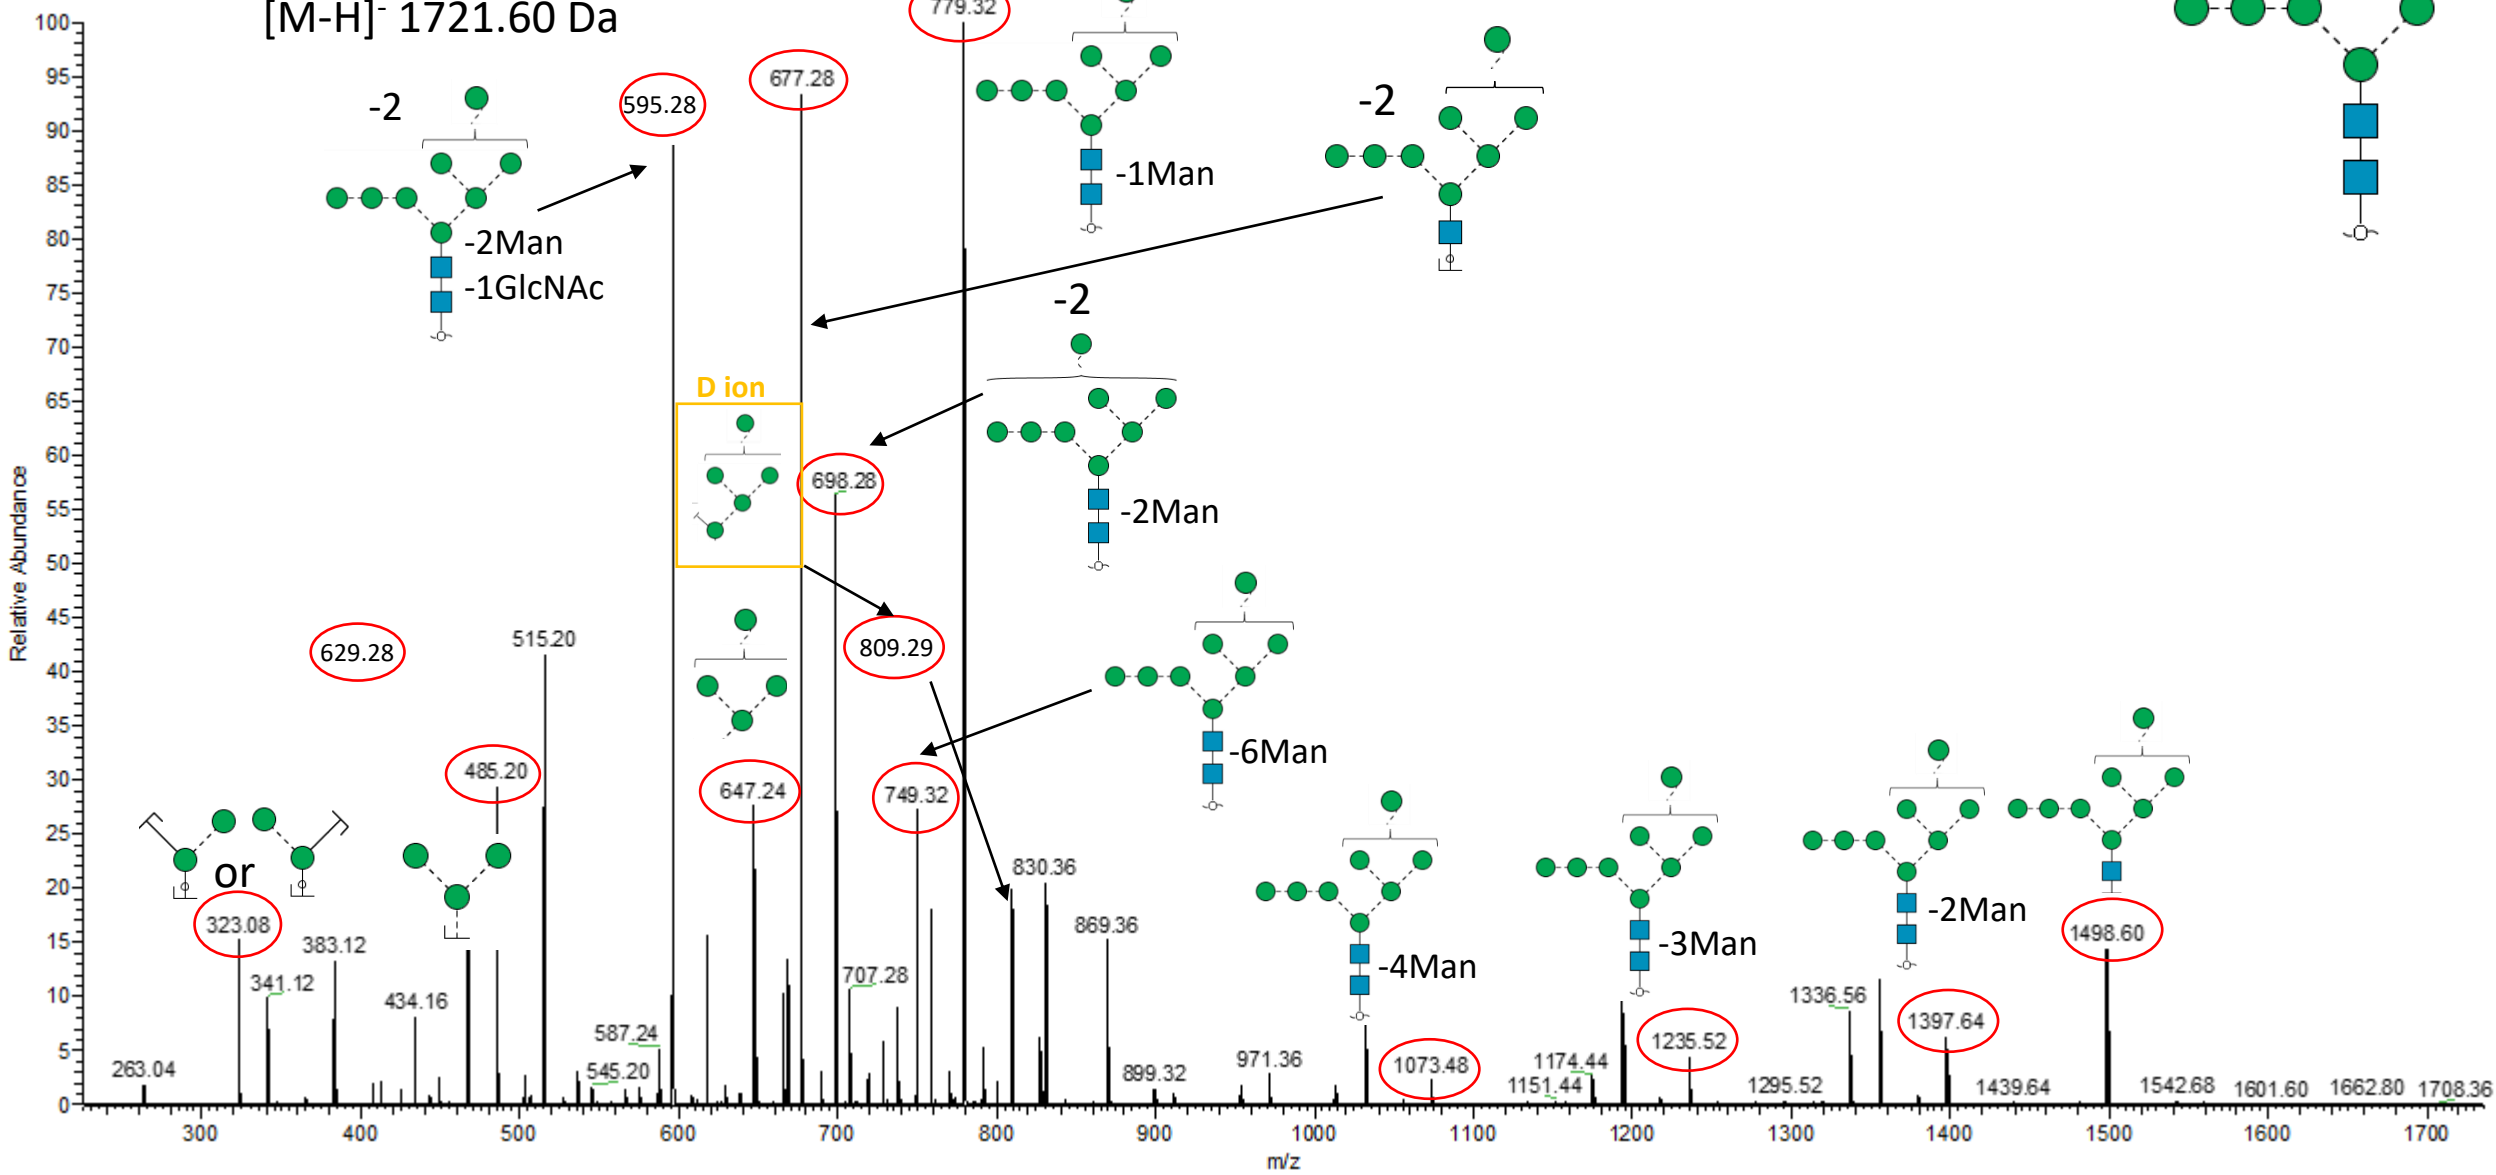

\* Ambiguity of the cross-ring fragments

## Glycan #5

Observed  $m/z$  941.36 (2-), RT: ~19.2 min

$[M-H]^-$  1883.65 Da

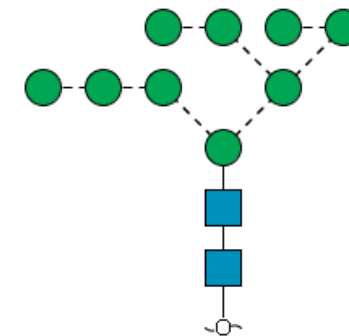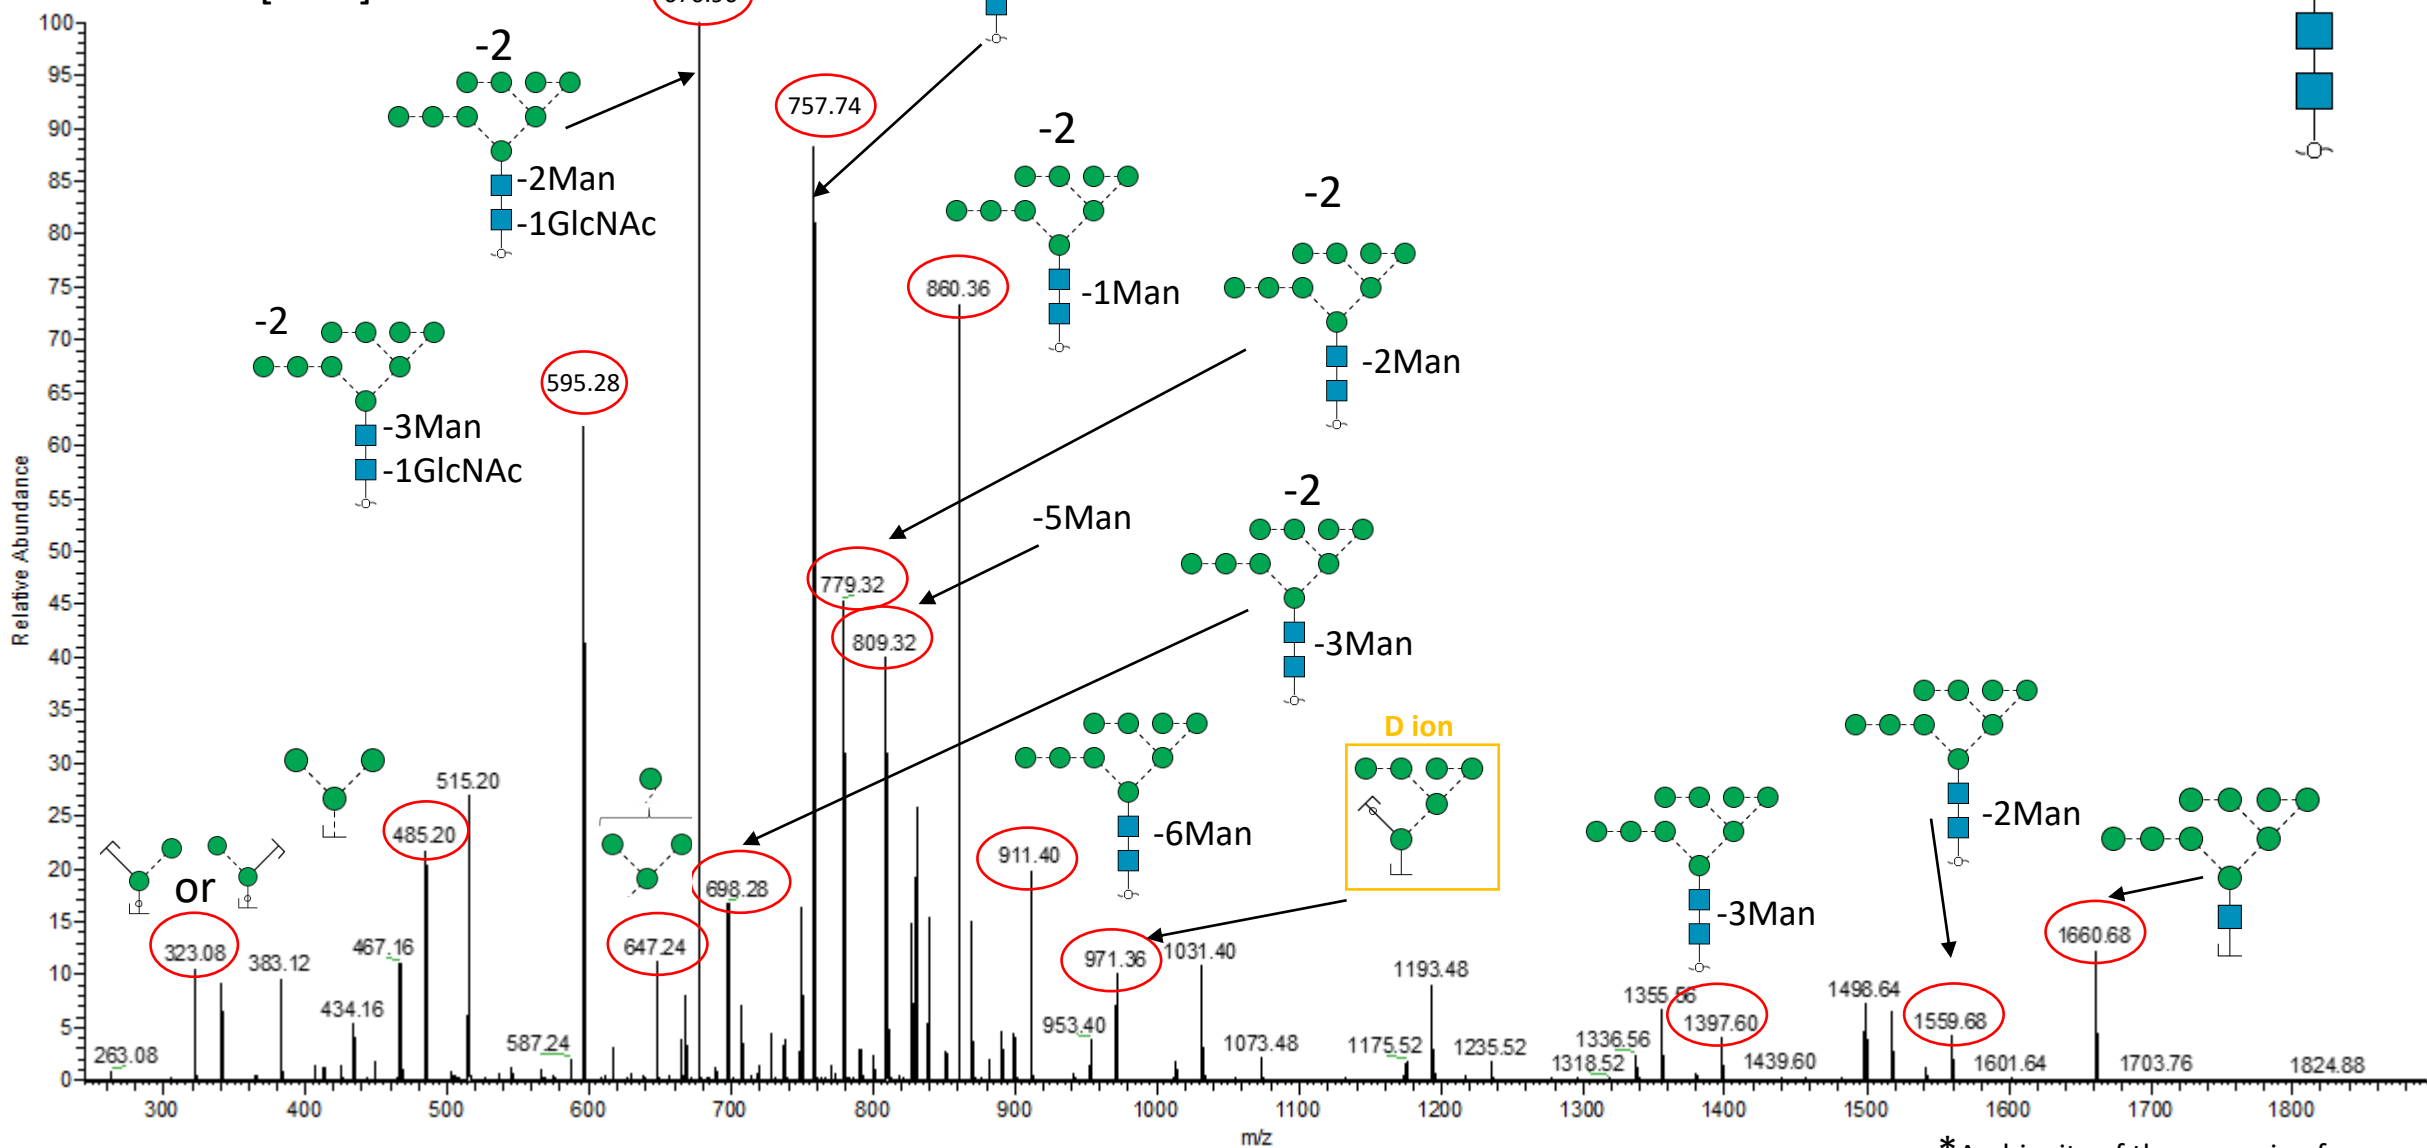

\*Ambiguity of the cross-ring fragments

Glycan #6

Observed  $m/z$  1022.40 (2-), RT: ~20.1 min  
[M-H]<sup>-</sup> 2045.70 Da

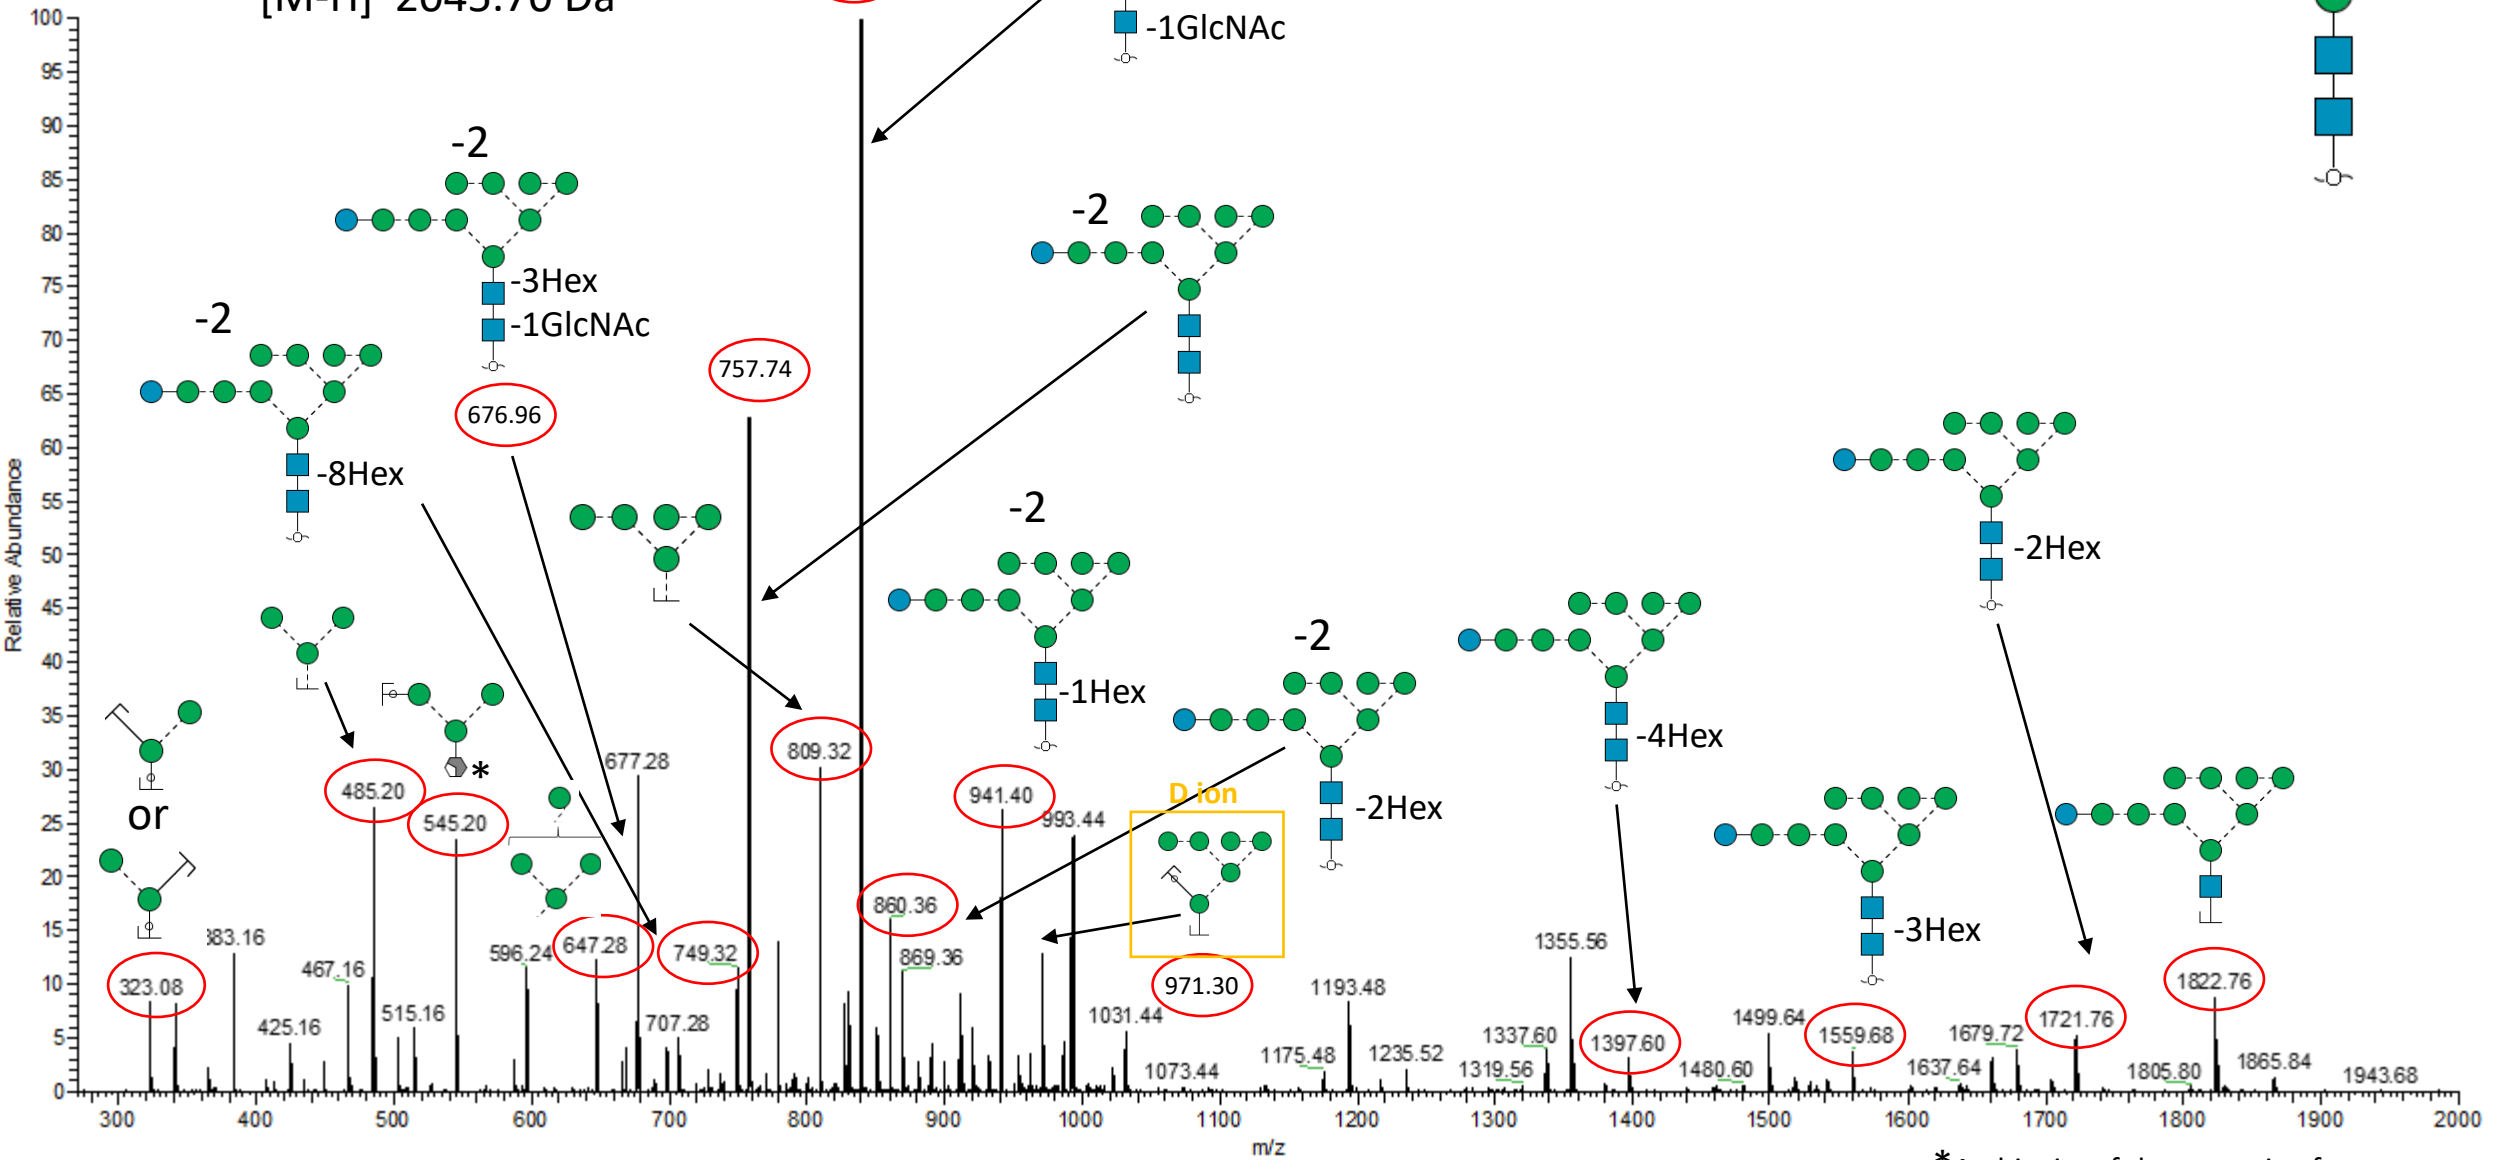

\* Ambiguity of the cross-ring fragments



Glycan #7

Observed  $m/z$  718.78 (2-), RT: ~20.6 min  
[M-H]<sup>-</sup> 1438.52 Da

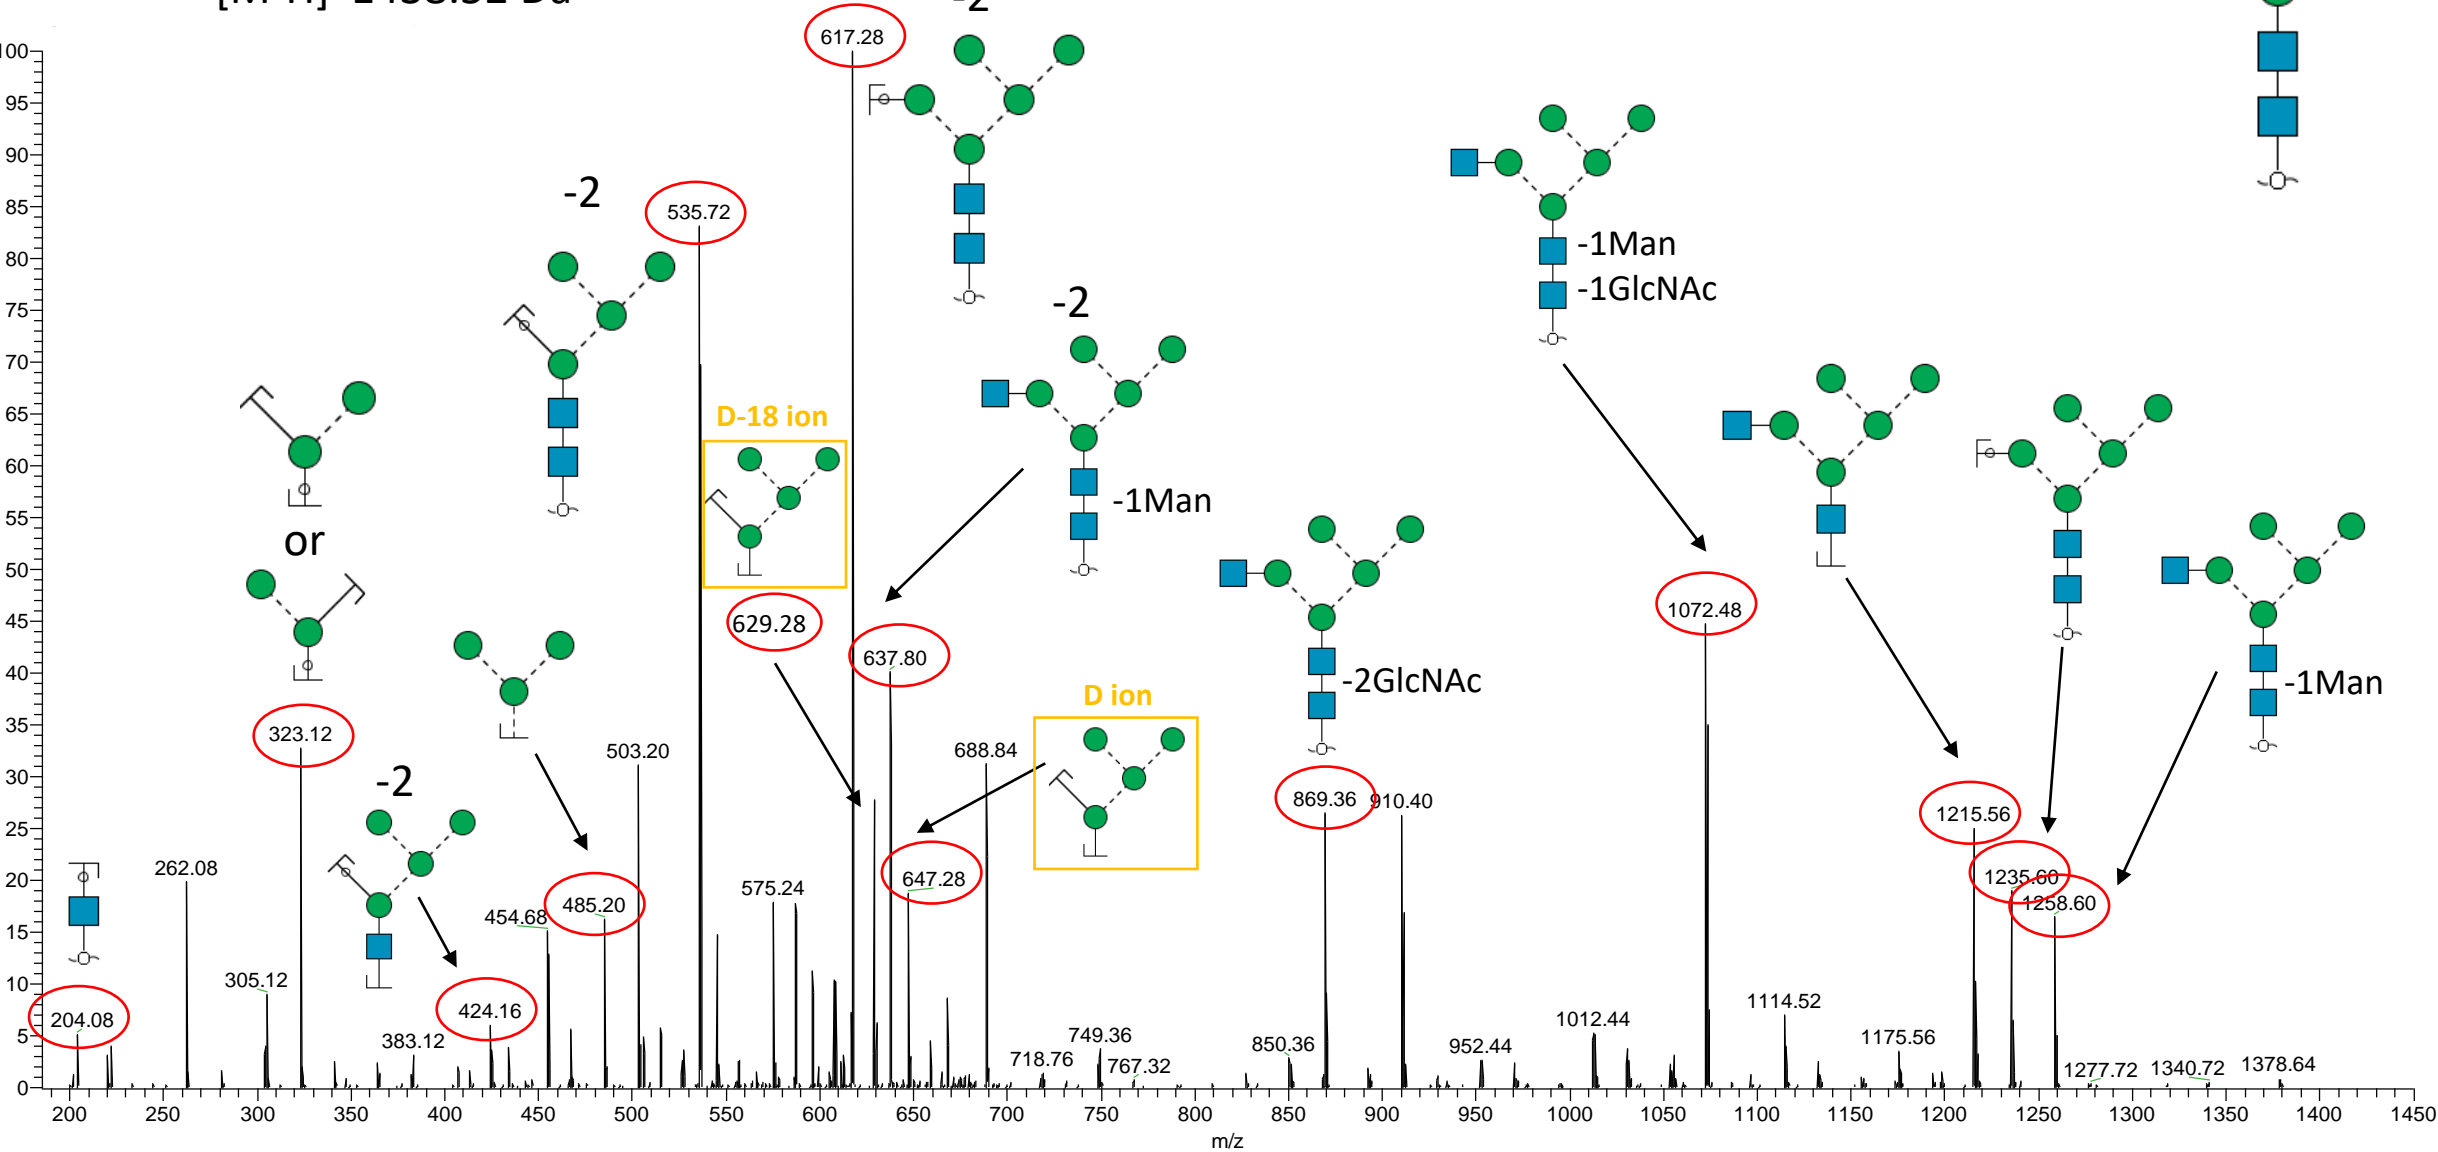

\*Ambiguity in the cross-ring fragments

Glycan #8

Observed  $m/z$  864.32 (2-), RT: ~22.5 min  
[M-H]<sup>-</sup> 1729.61 Da

Note: Based on PGC-LC elution pattern, this glycan is annotated as the  $\alpha$ 2,6-sialyl linkage isomer.

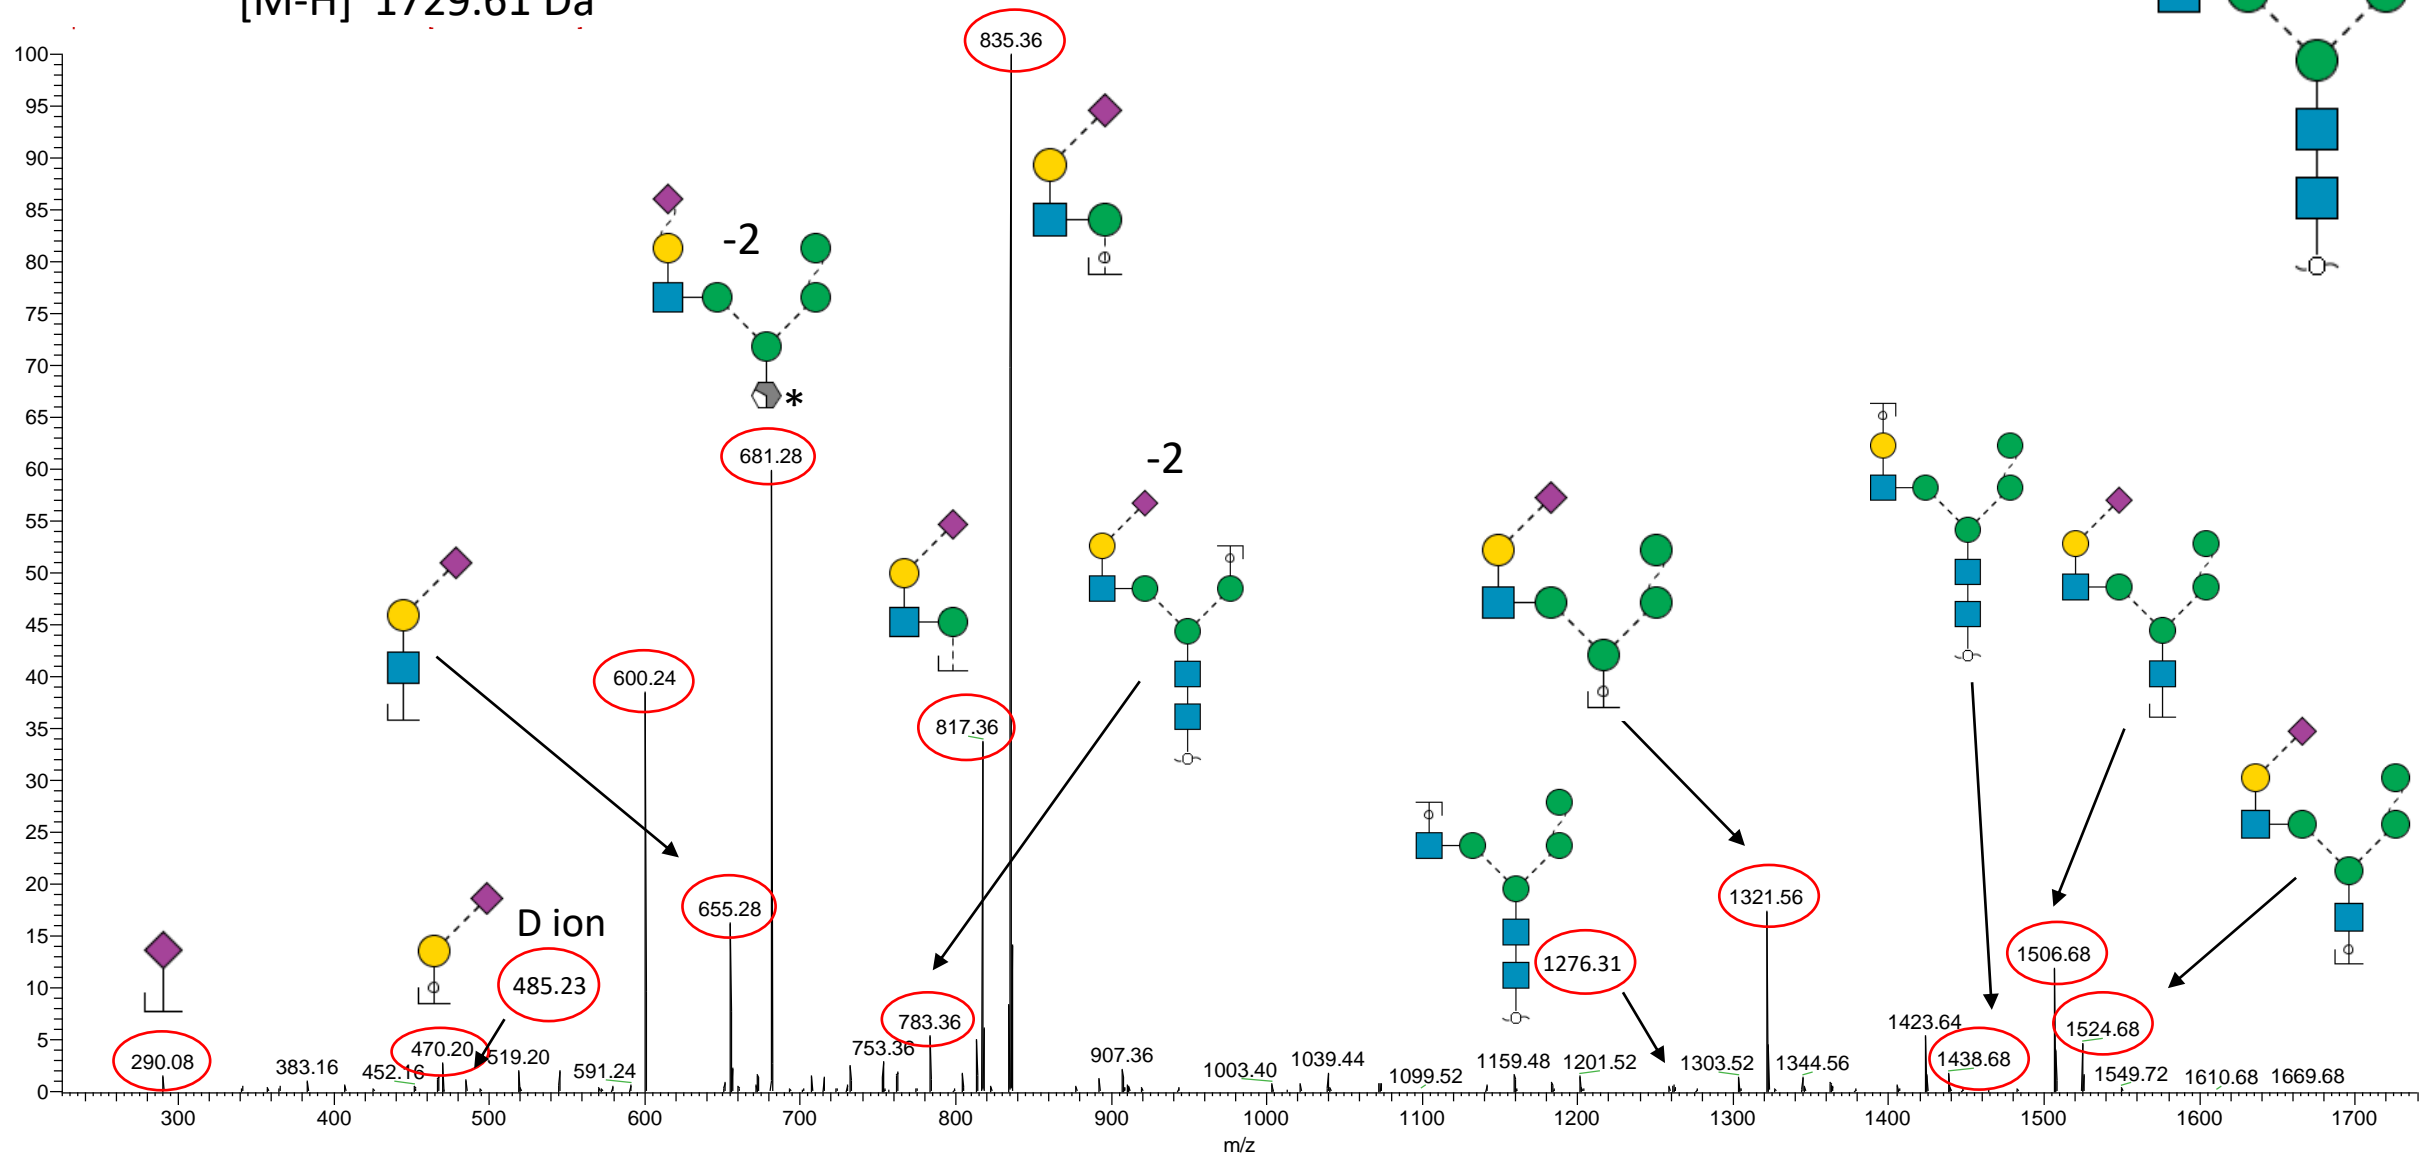

\* Ambiguity in the cross-ring fragments

# Glycan #9

Observed  $m/z$  799.78 (2-), RT: ~23.2 min

$[M-H]^-$  1600.57 Da

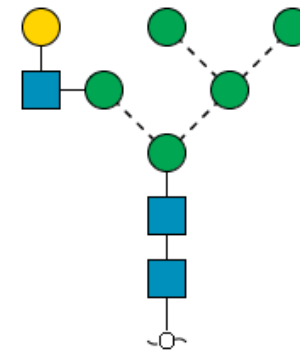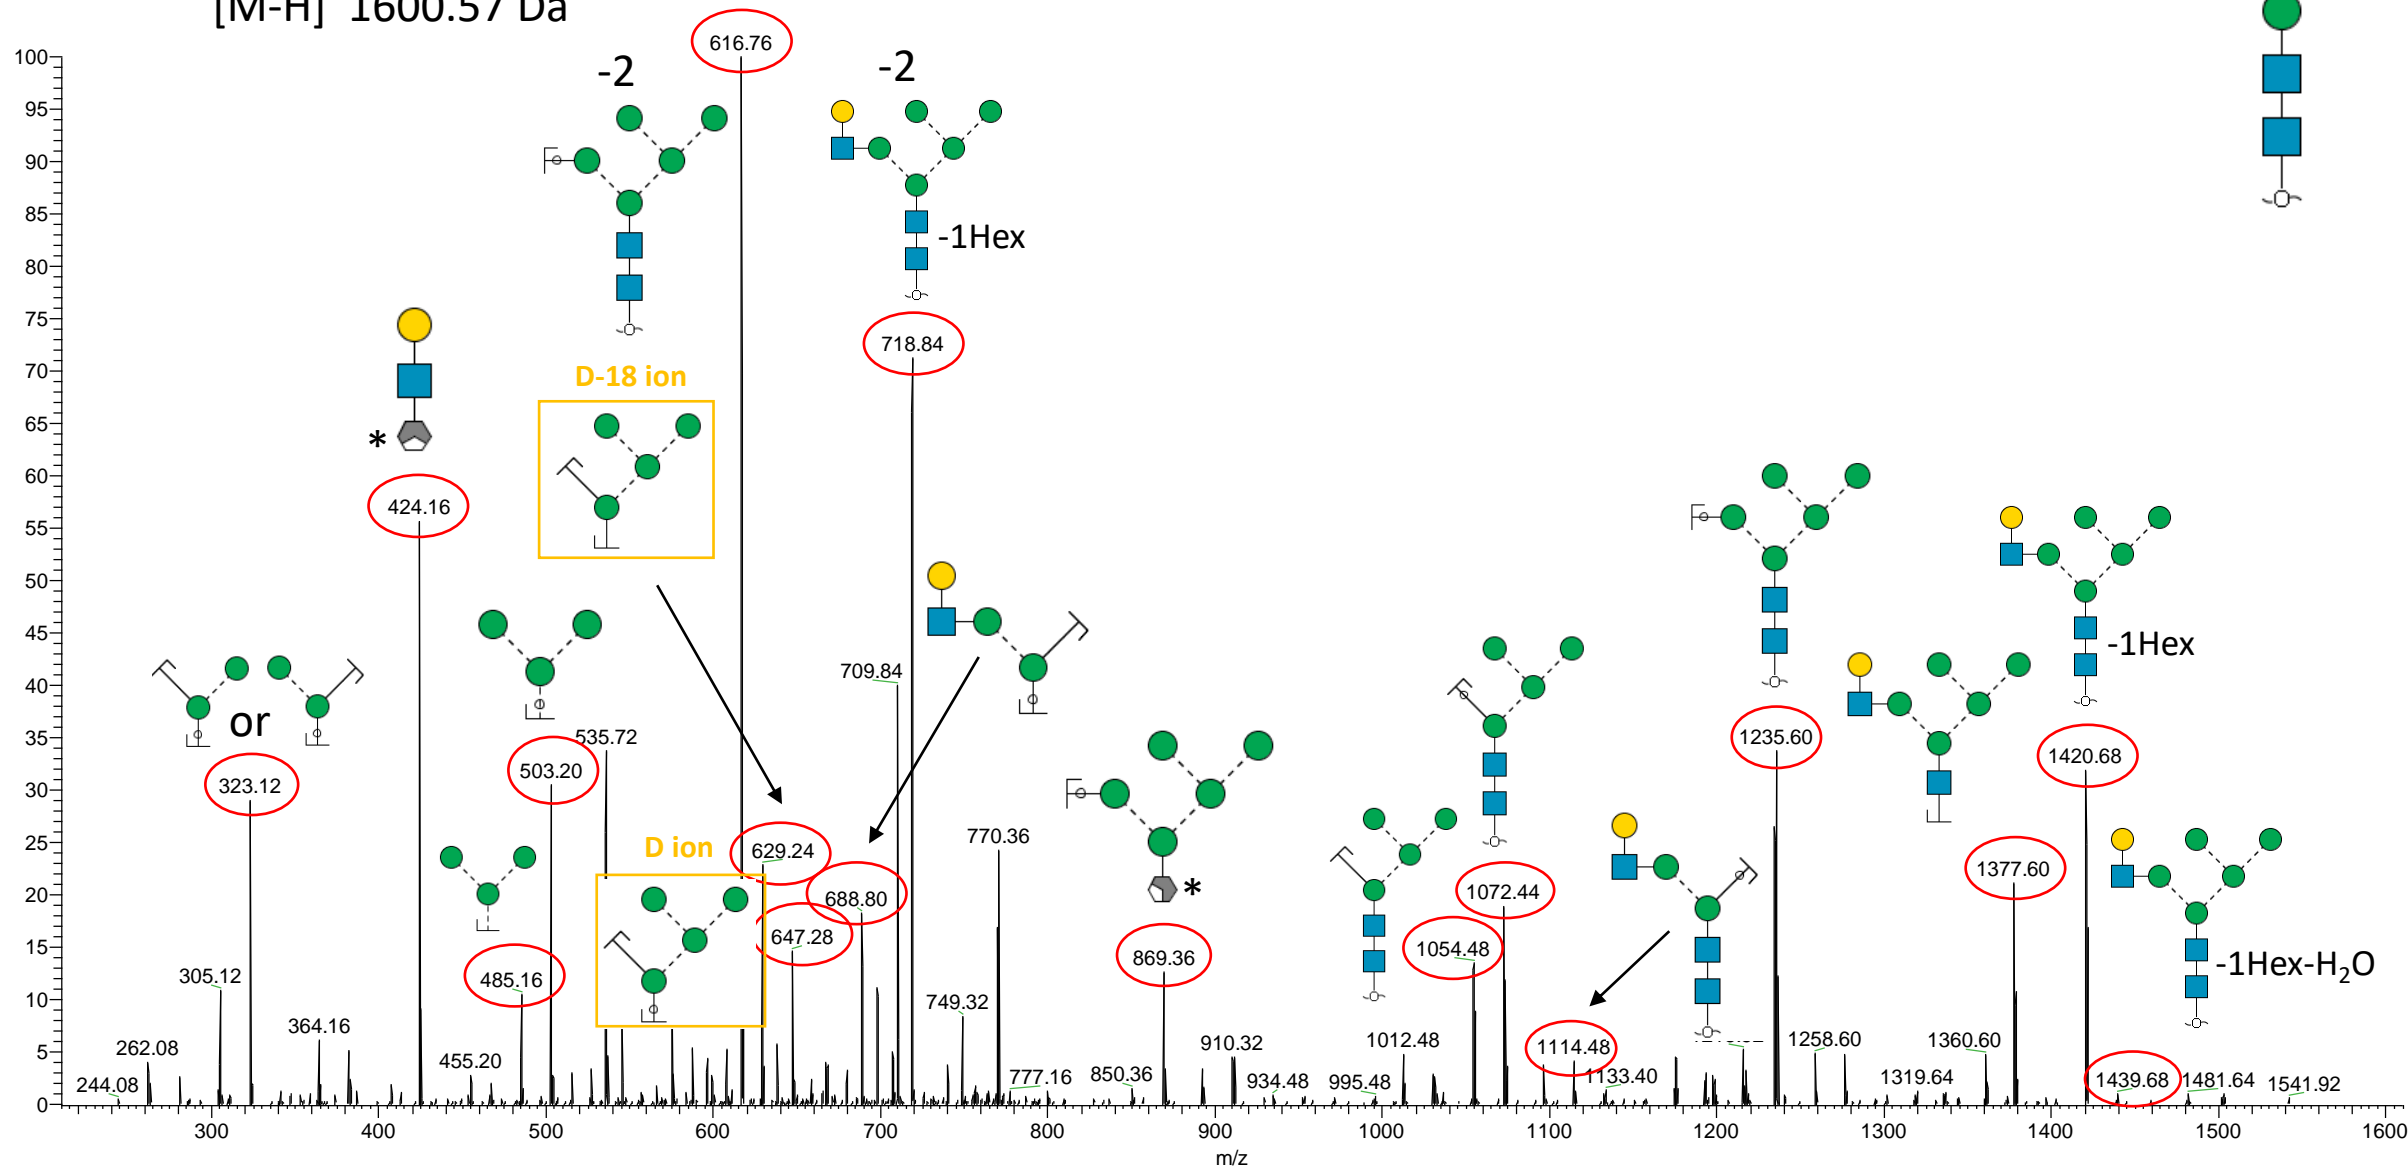

\* Ambiguity in the cross-ring fragments

Glycan #10

Observed  $m/z$  945.36 (2-), RT: ~25.1 min  
[M-H]<sup>-</sup> 1891.66 Da

Note: Based on PGC-LC elution pattern, this glycan is annotated as the  $\alpha$ 2,6-sialyl linkage isomer.

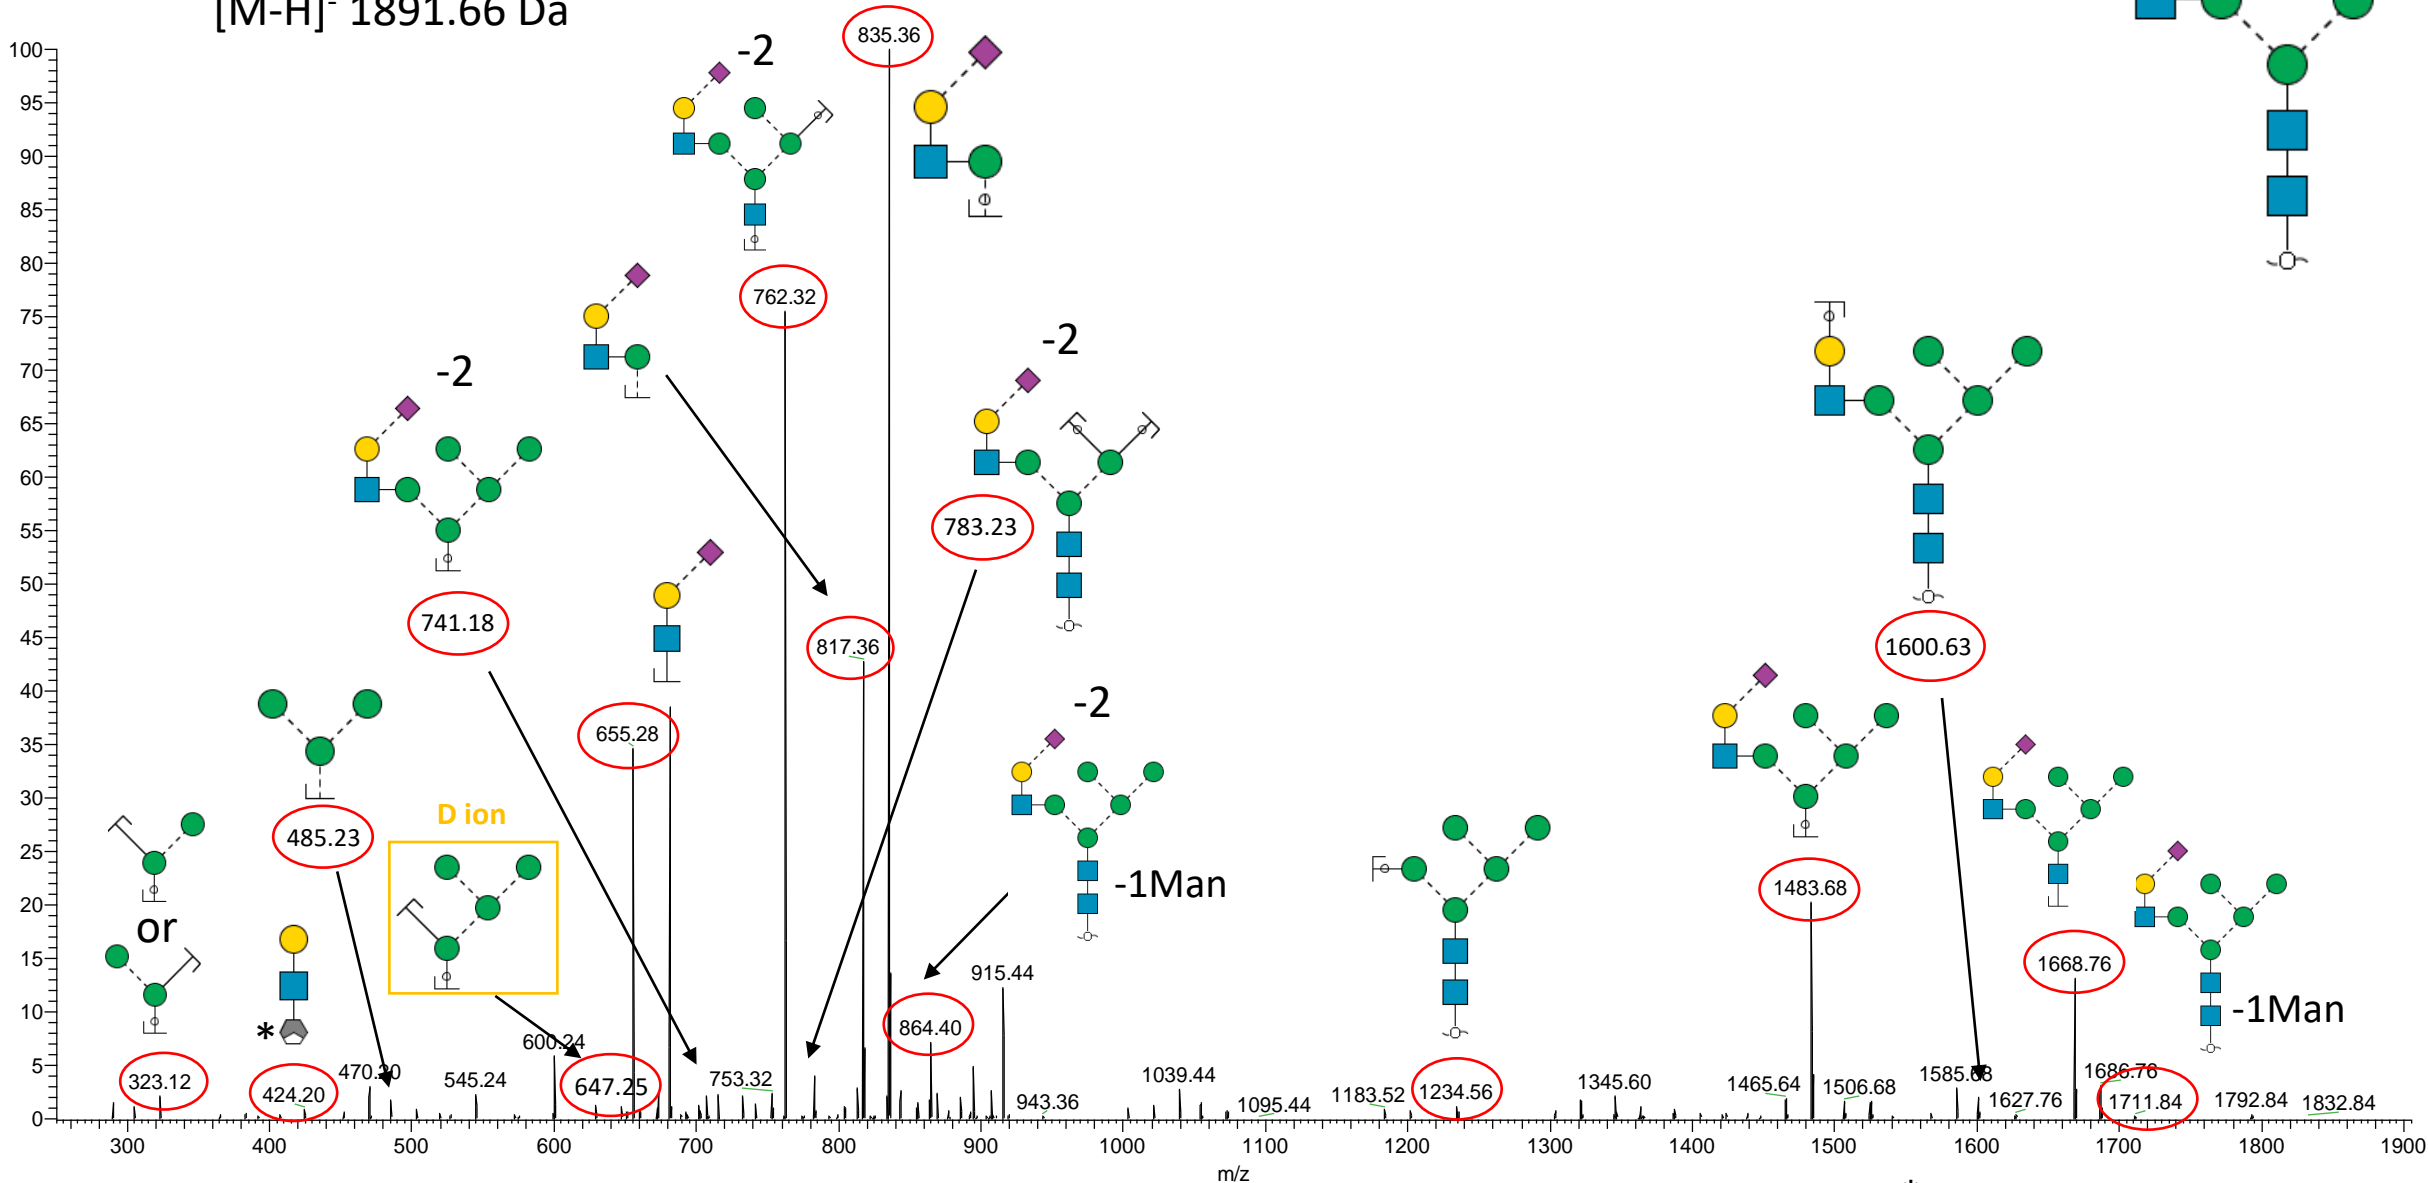

\*Ambiguity in the cross-ring fragments

Glycan #11

Observed  $m/z$  1260.48 (1-), RT: ~22.5 min  
[M-H]<sup>-</sup> 1260.47 Da

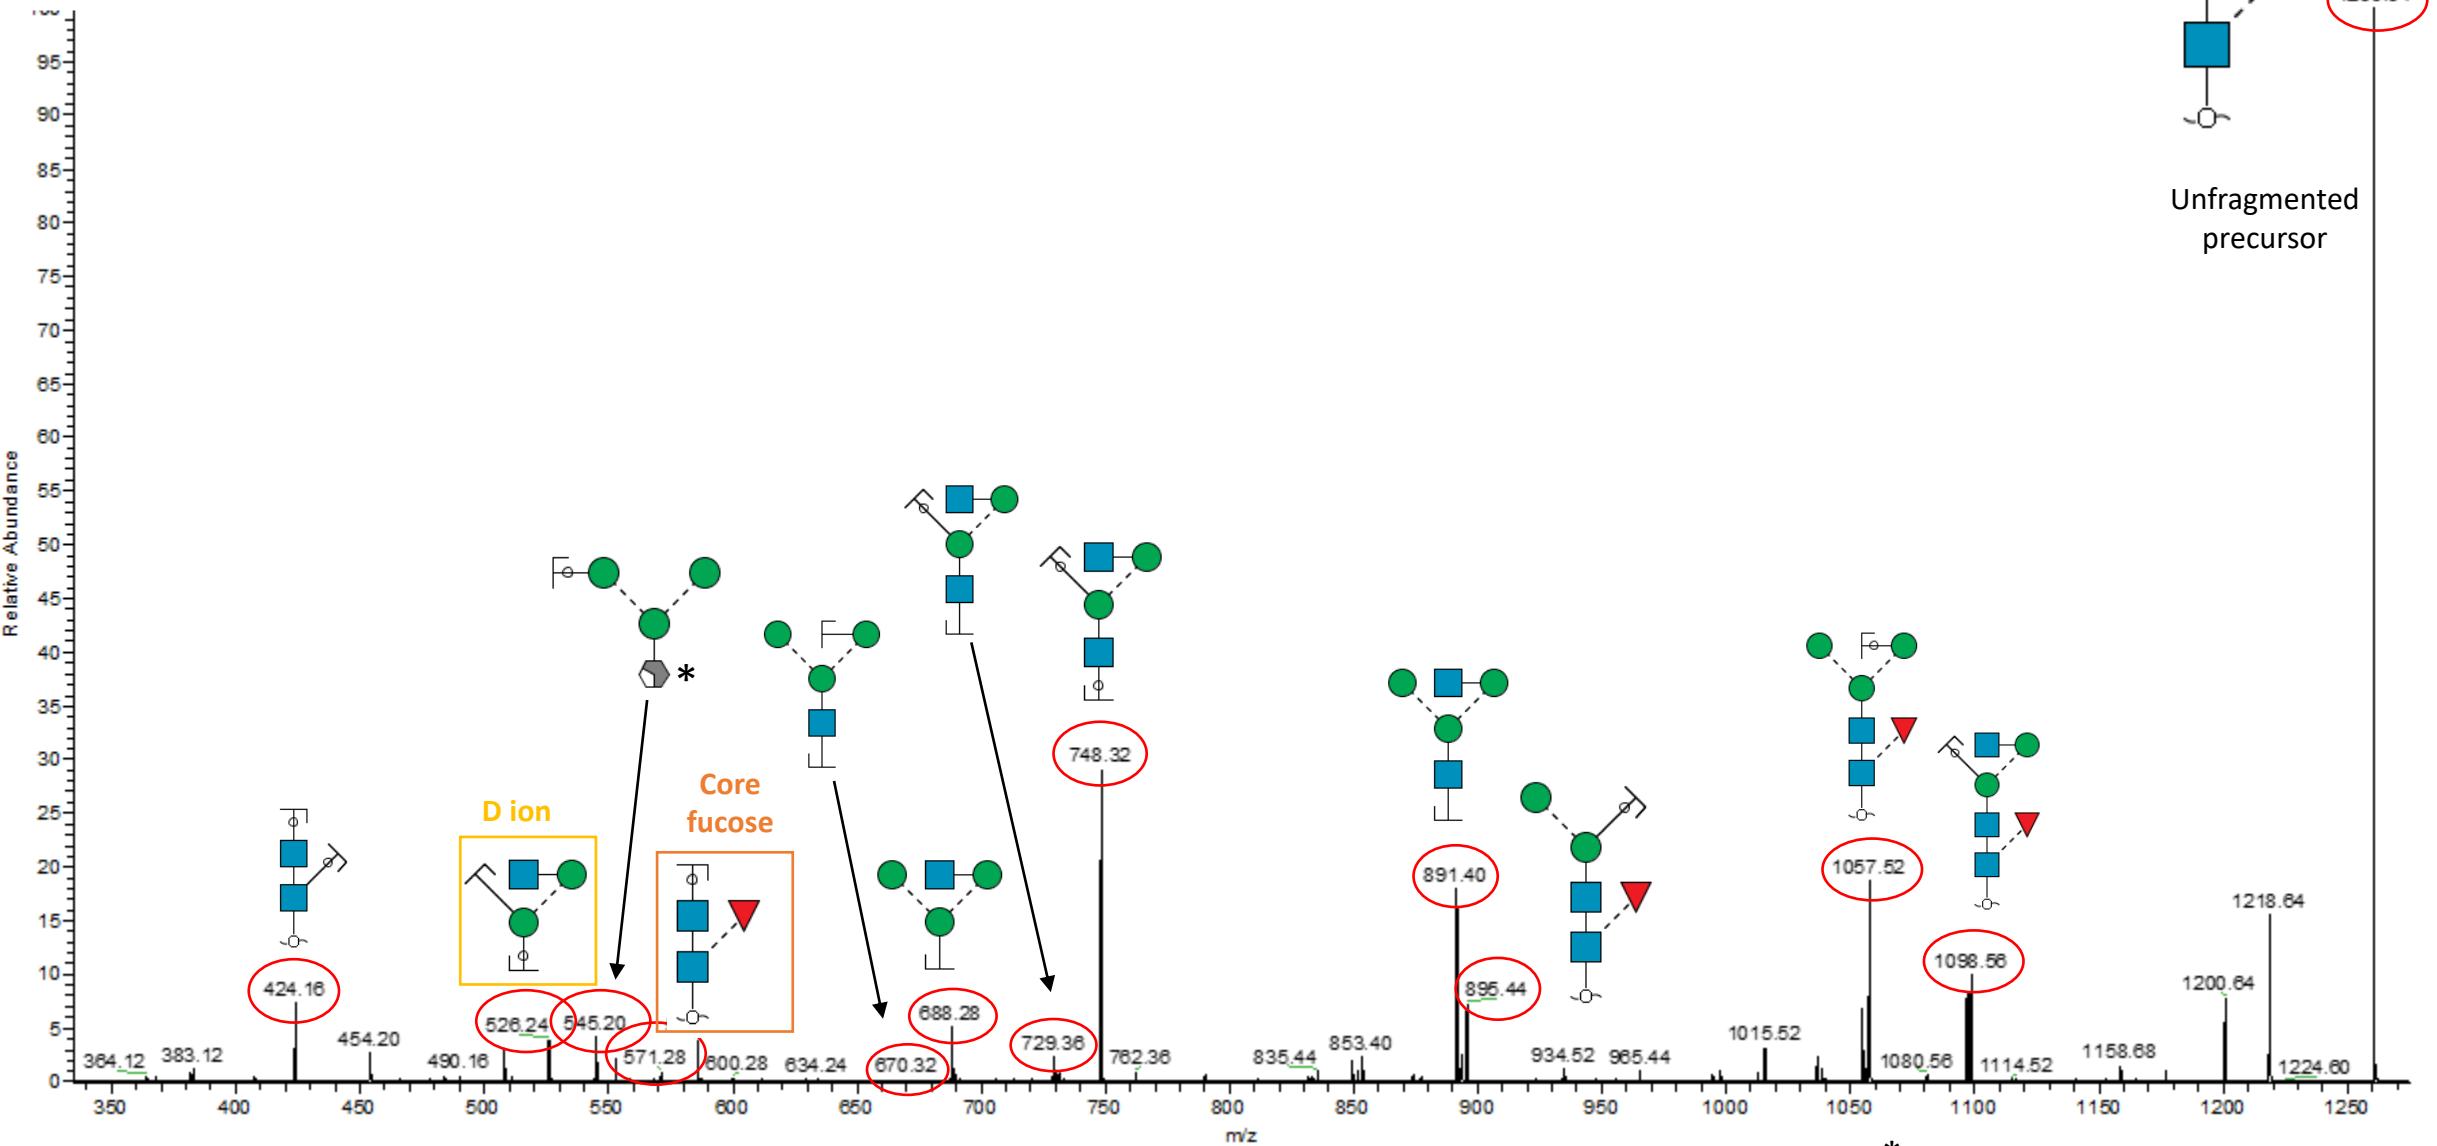

\* Ambiguity in the cross-ring fragments

Glycan #12a

Observed  $m/z$  783.30 (2-), RT: ~23.4 min  
[M-H]<sup>-</sup> 1567.56 Da

Note: From biosynthetic pathway and the lack of D and/or D-18 ions, monoantennary sialylation is predicted to occupy the  $\alpha$ -1,3 arm. Based on early PGC-LC elution, this glycan is annotated as the  $\alpha$ 2,6-sialyl linkage isomer.

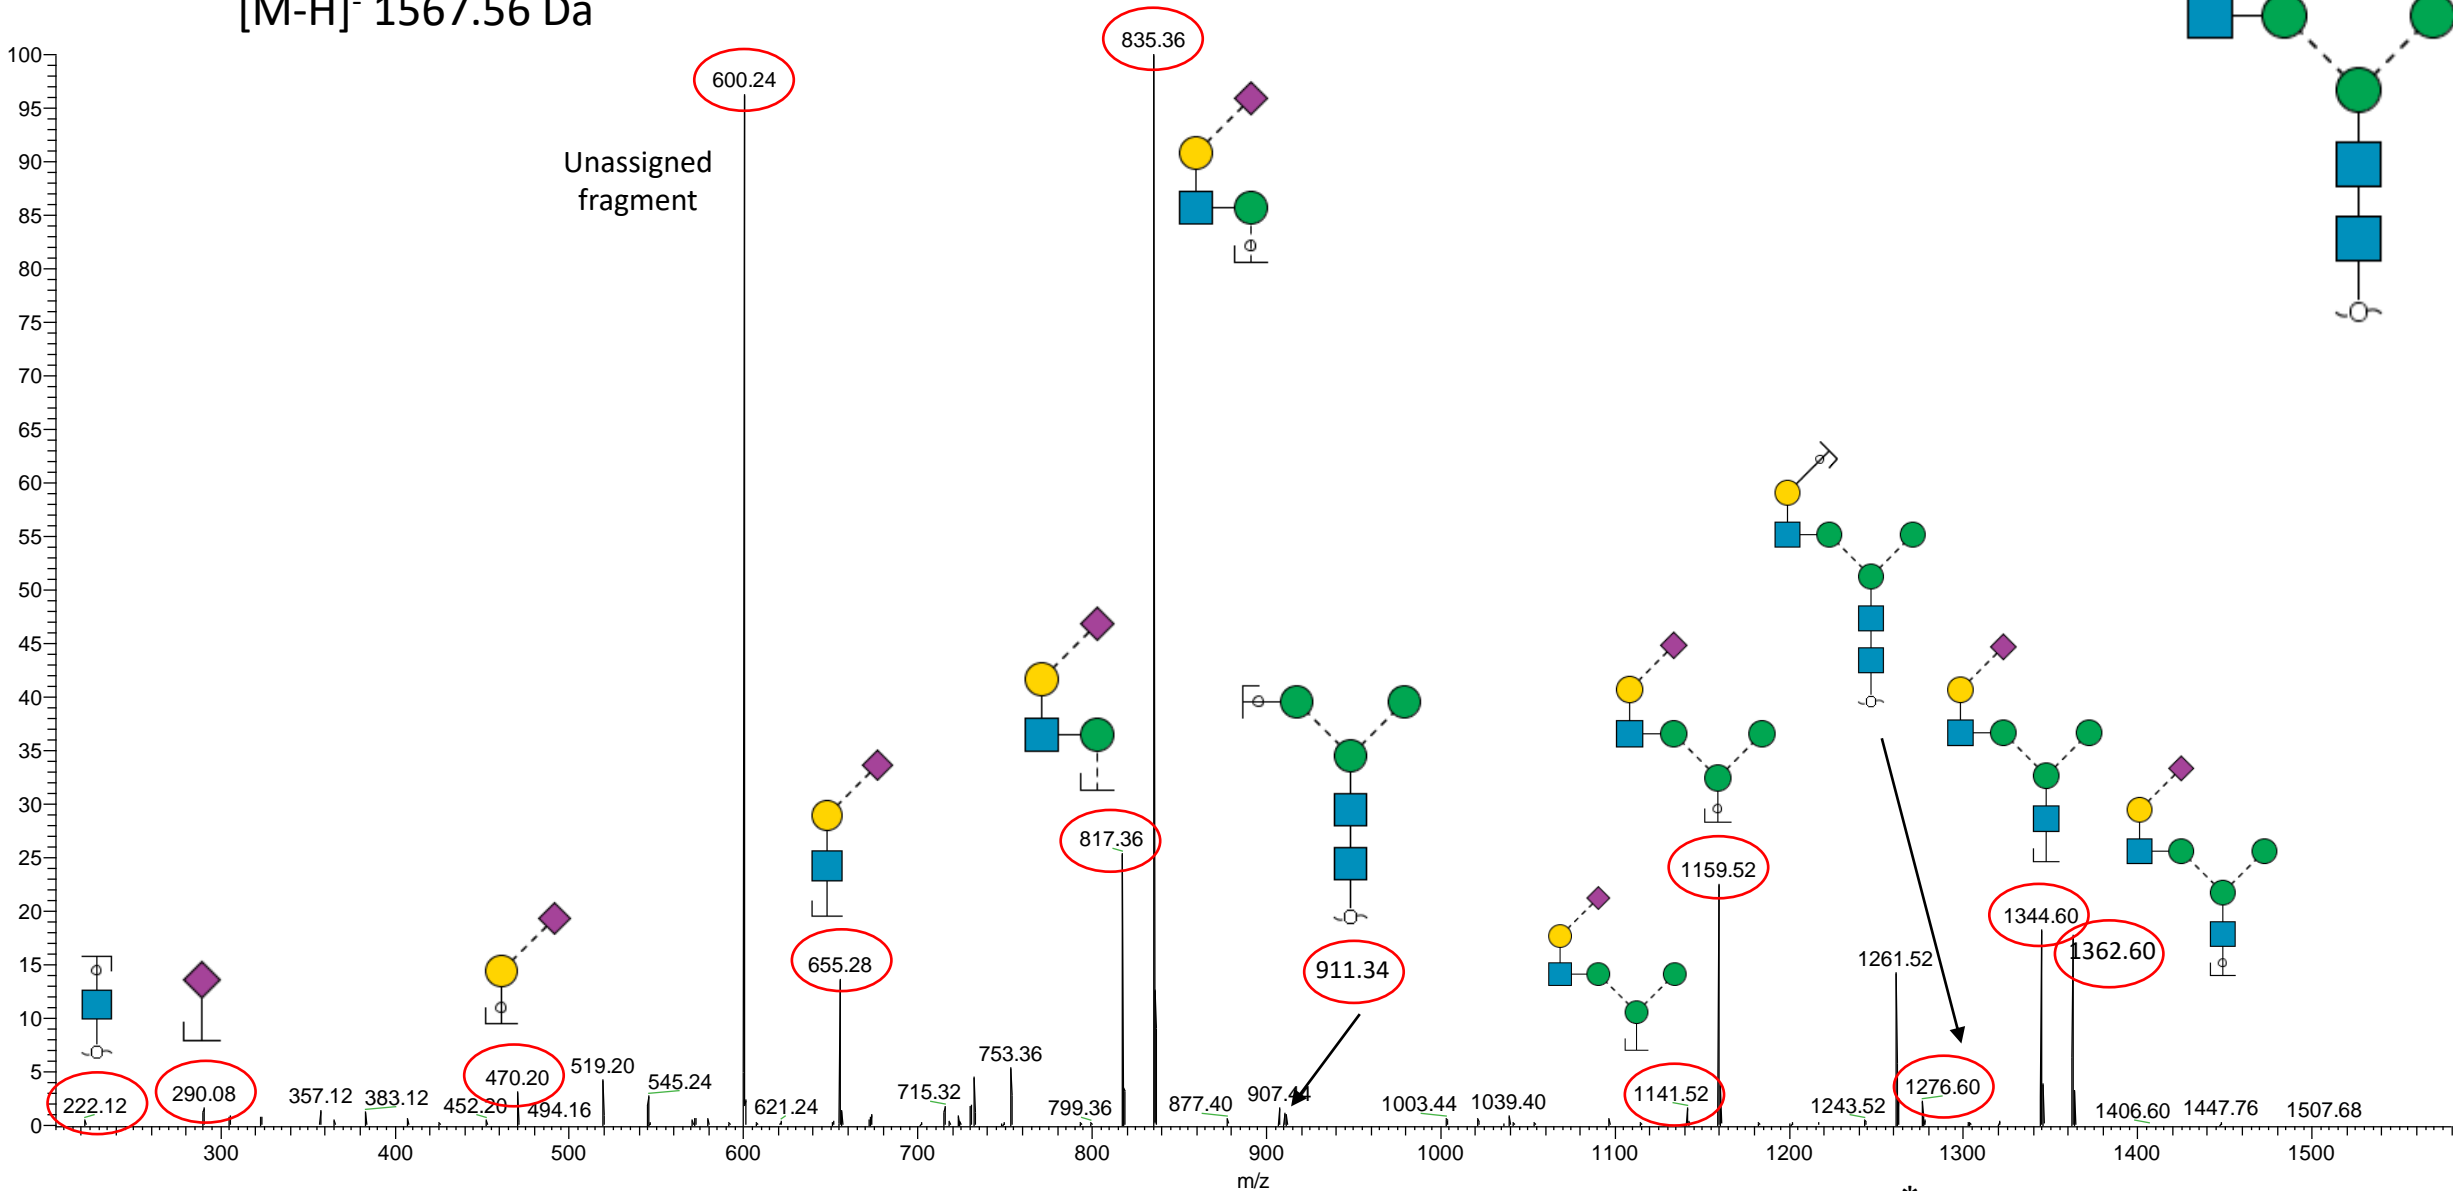

\* Ambiguity in the cross-ring fragments

## Glycan #12b

Observed  $m/z$  783.30 (2-), RT: ~28.3 min  
[M-H]<sup>-</sup> 1567.56 Da

Note: From biosynthetic pathway and the lack of D and/or D-18 ions, monoantennary sialylation is predicted to occupy the  $\alpha$ -1,3 arm. Based on late PGC-LC elution, this glycan is annotated as the  $\alpha$ 2,3-sialyl linkage isomer.

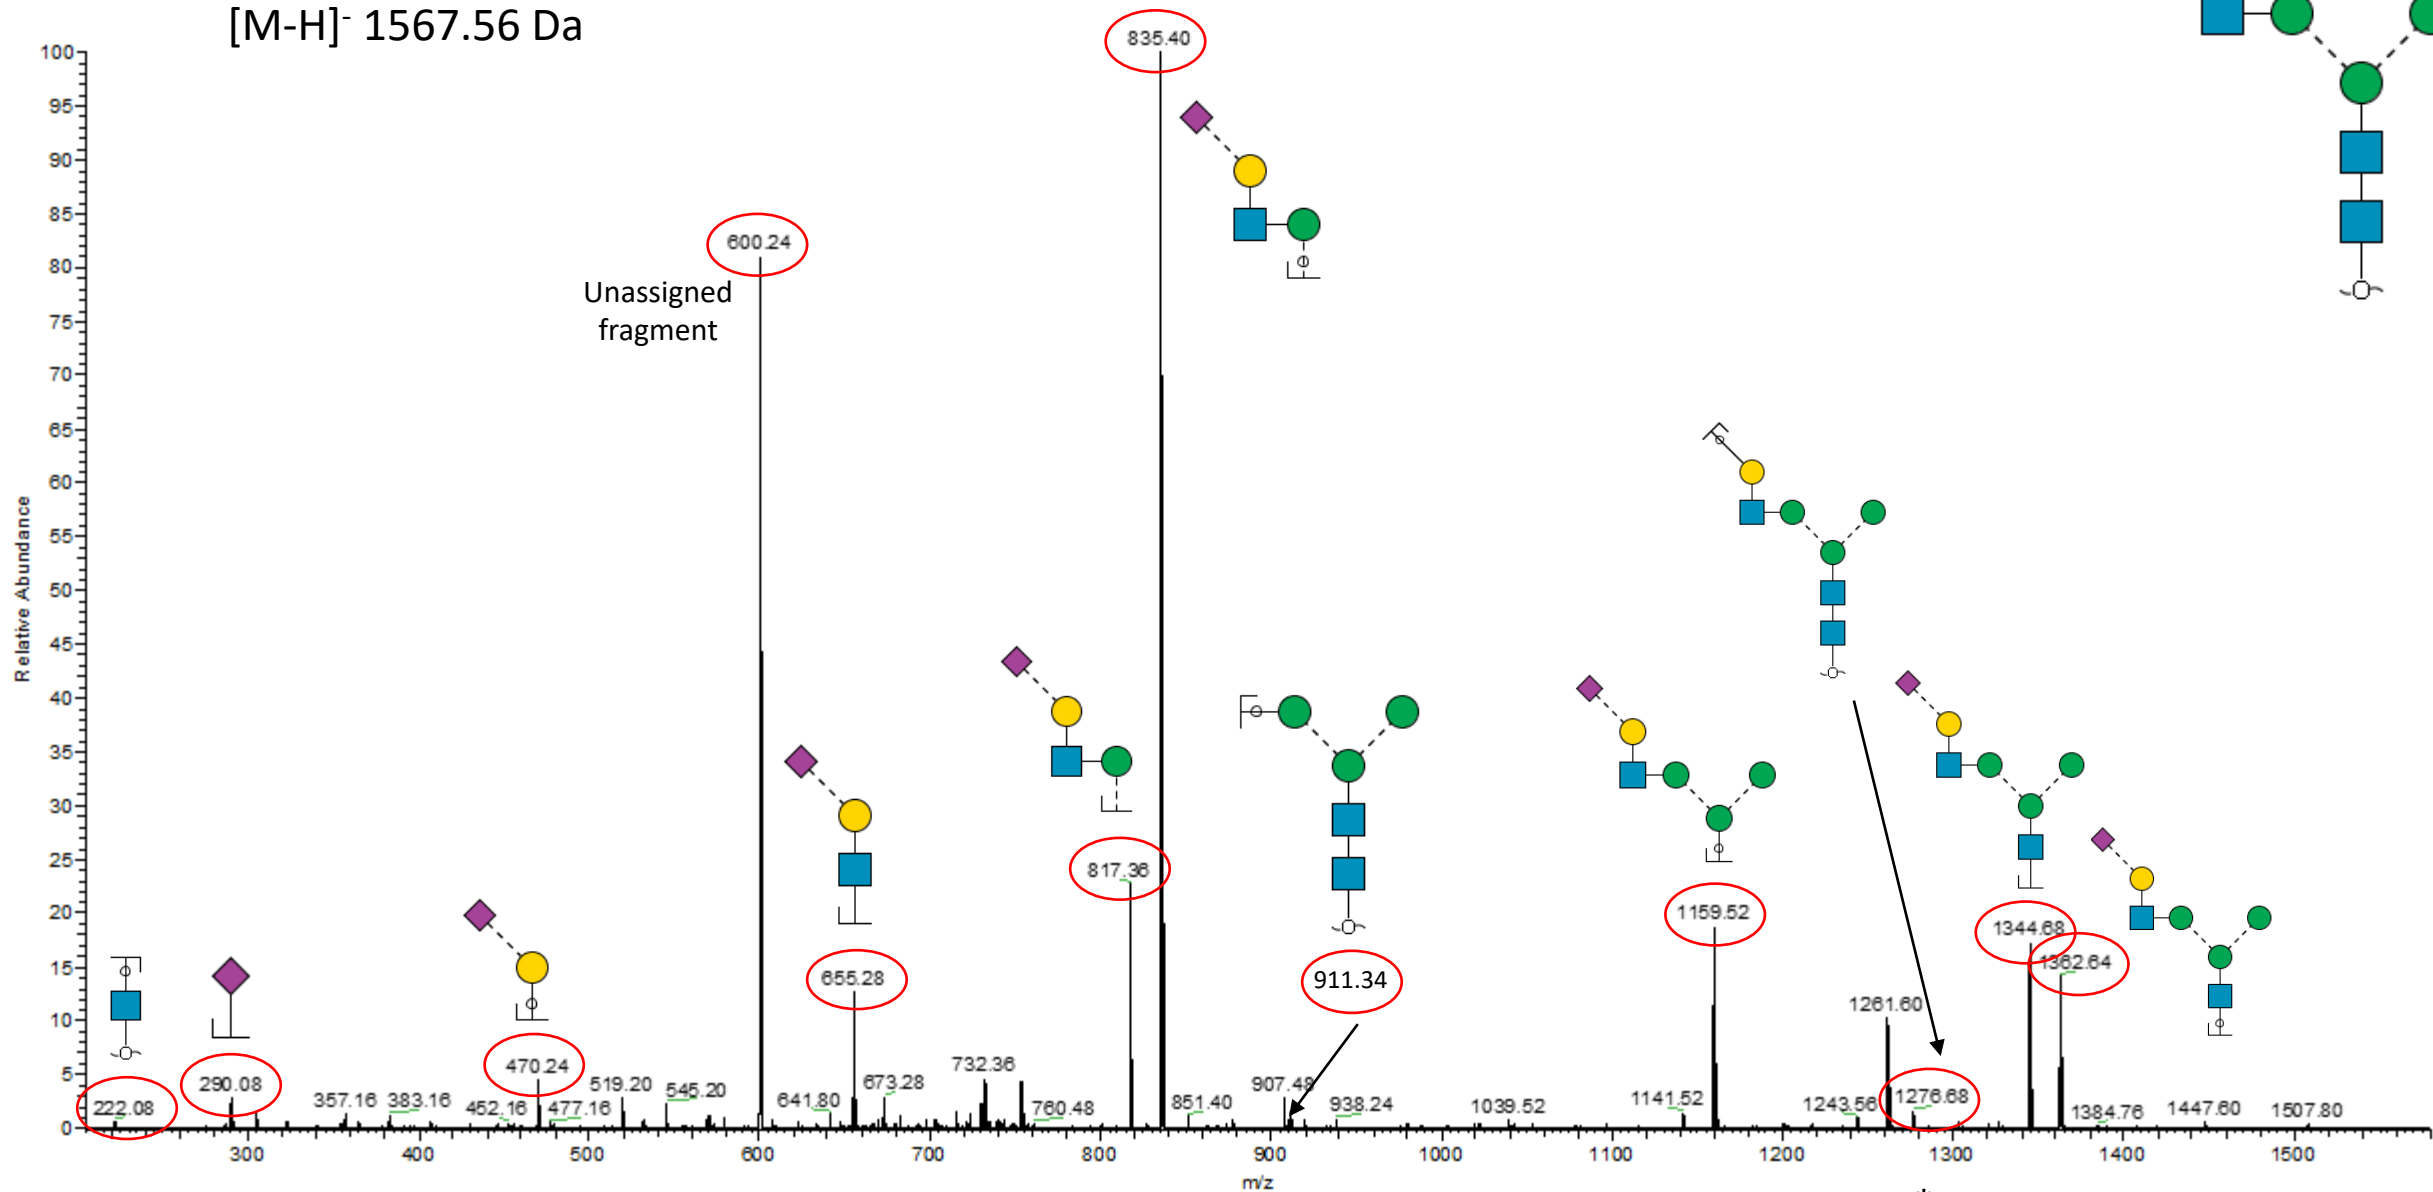

\* Ambiguity in the cross-ring fragments

Glycan #13

Observed  $m/z$  658.26 (2-), RT: ~20.5 min

$[M-H]^-$  1317.49 Da

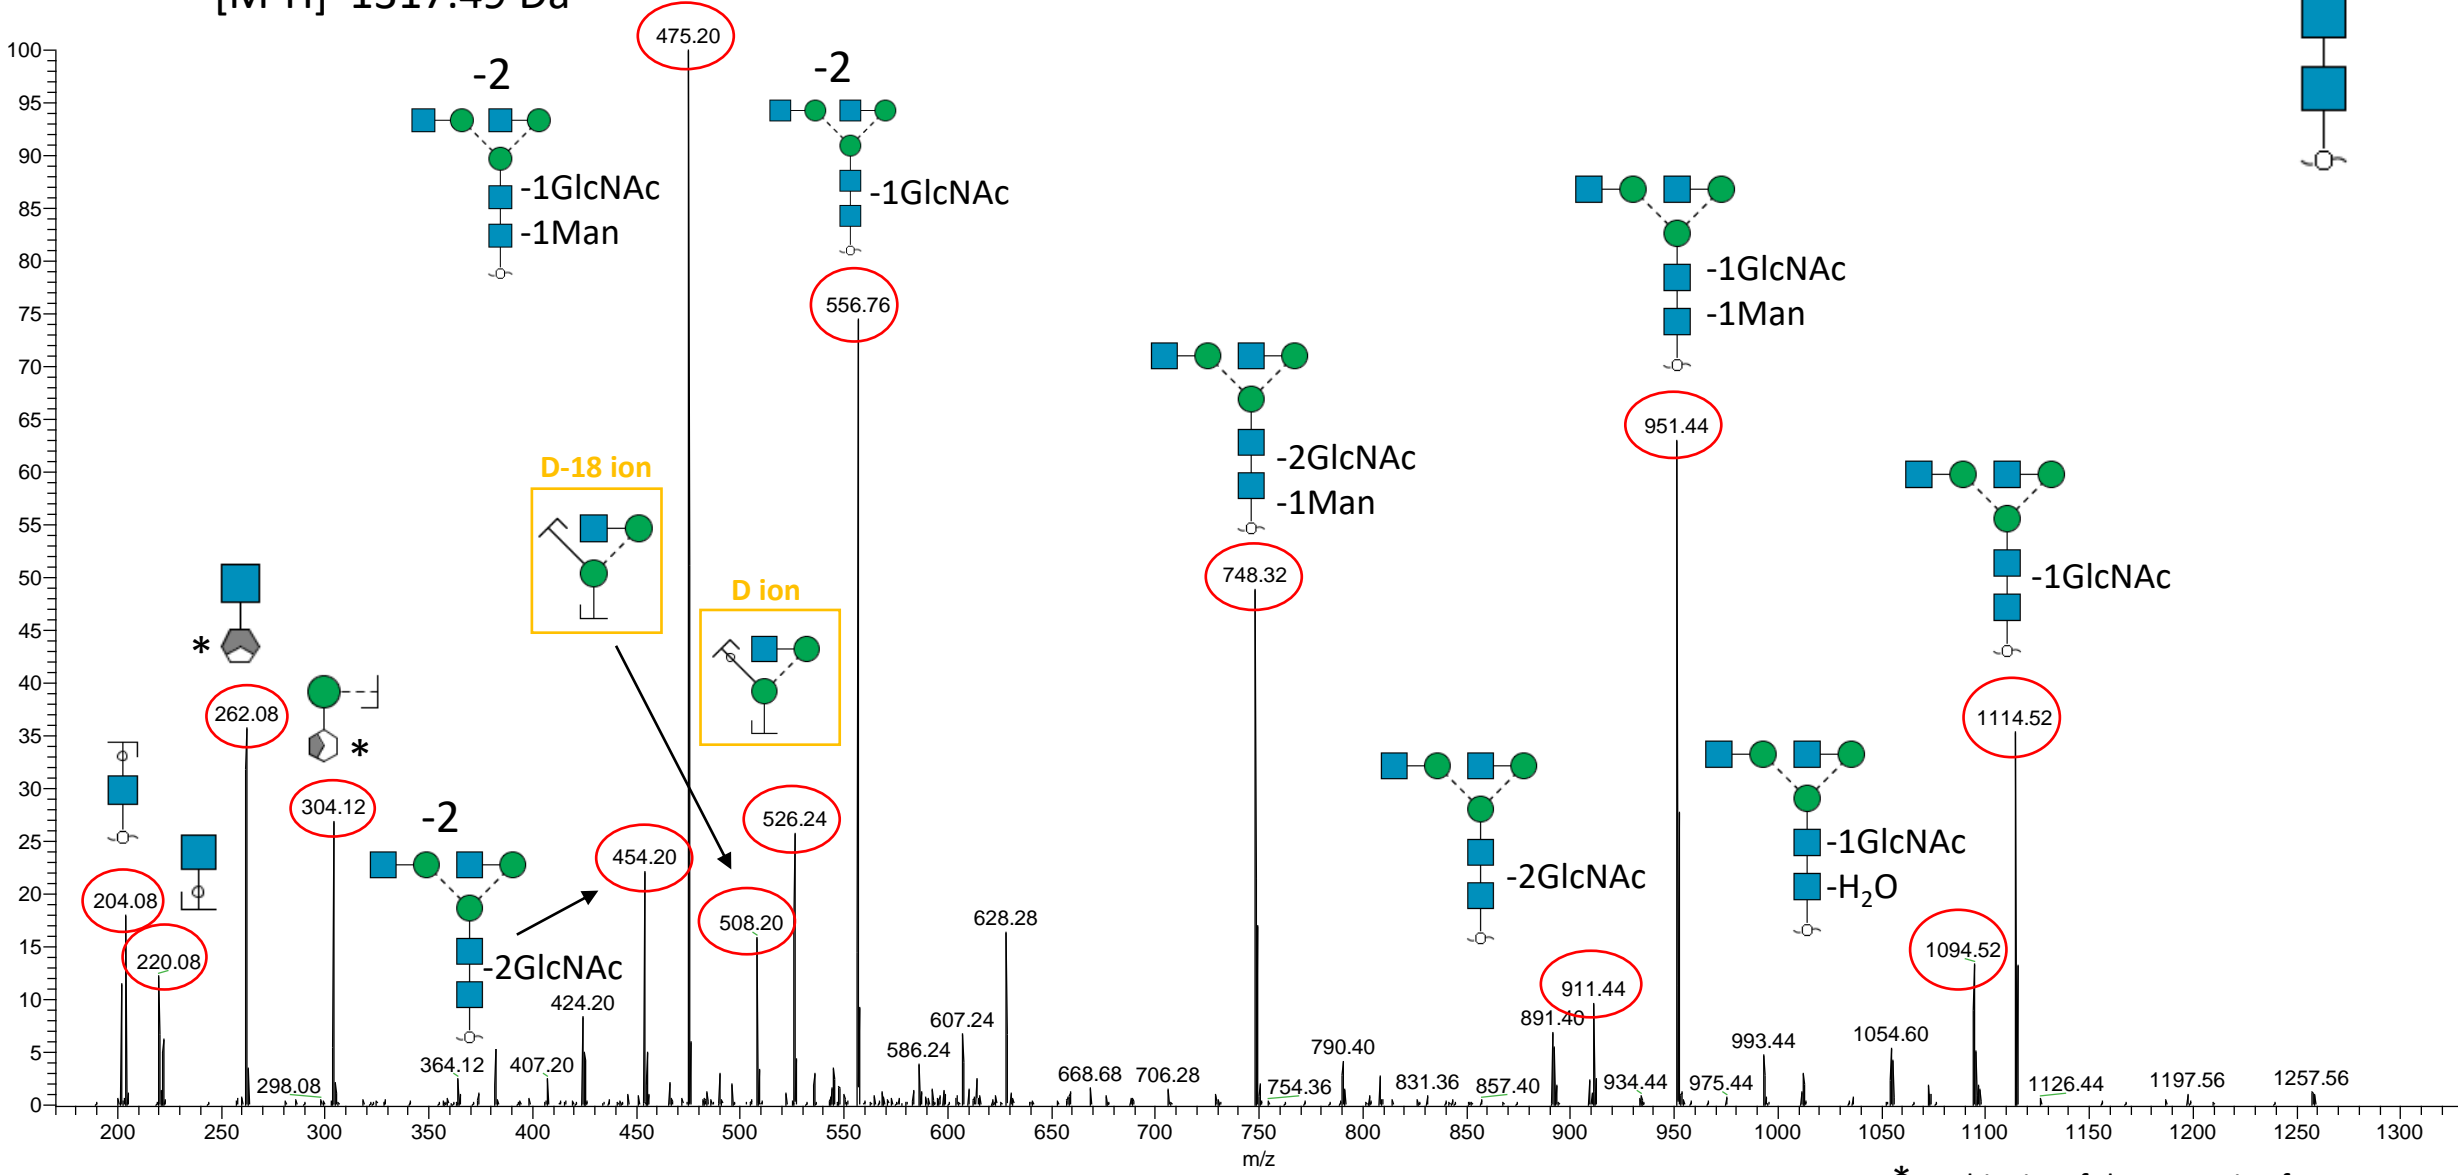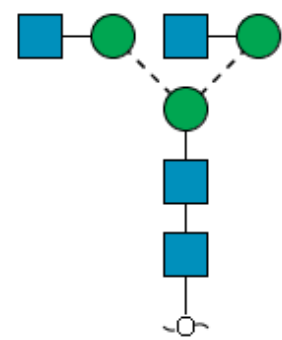

\* Ambiguity of the cross-ring fragments



Glycan #14

Observed  $m/z$  731.30 (2-), RT: ~24.7 min

$[M-H]^-$  1463.55 Da

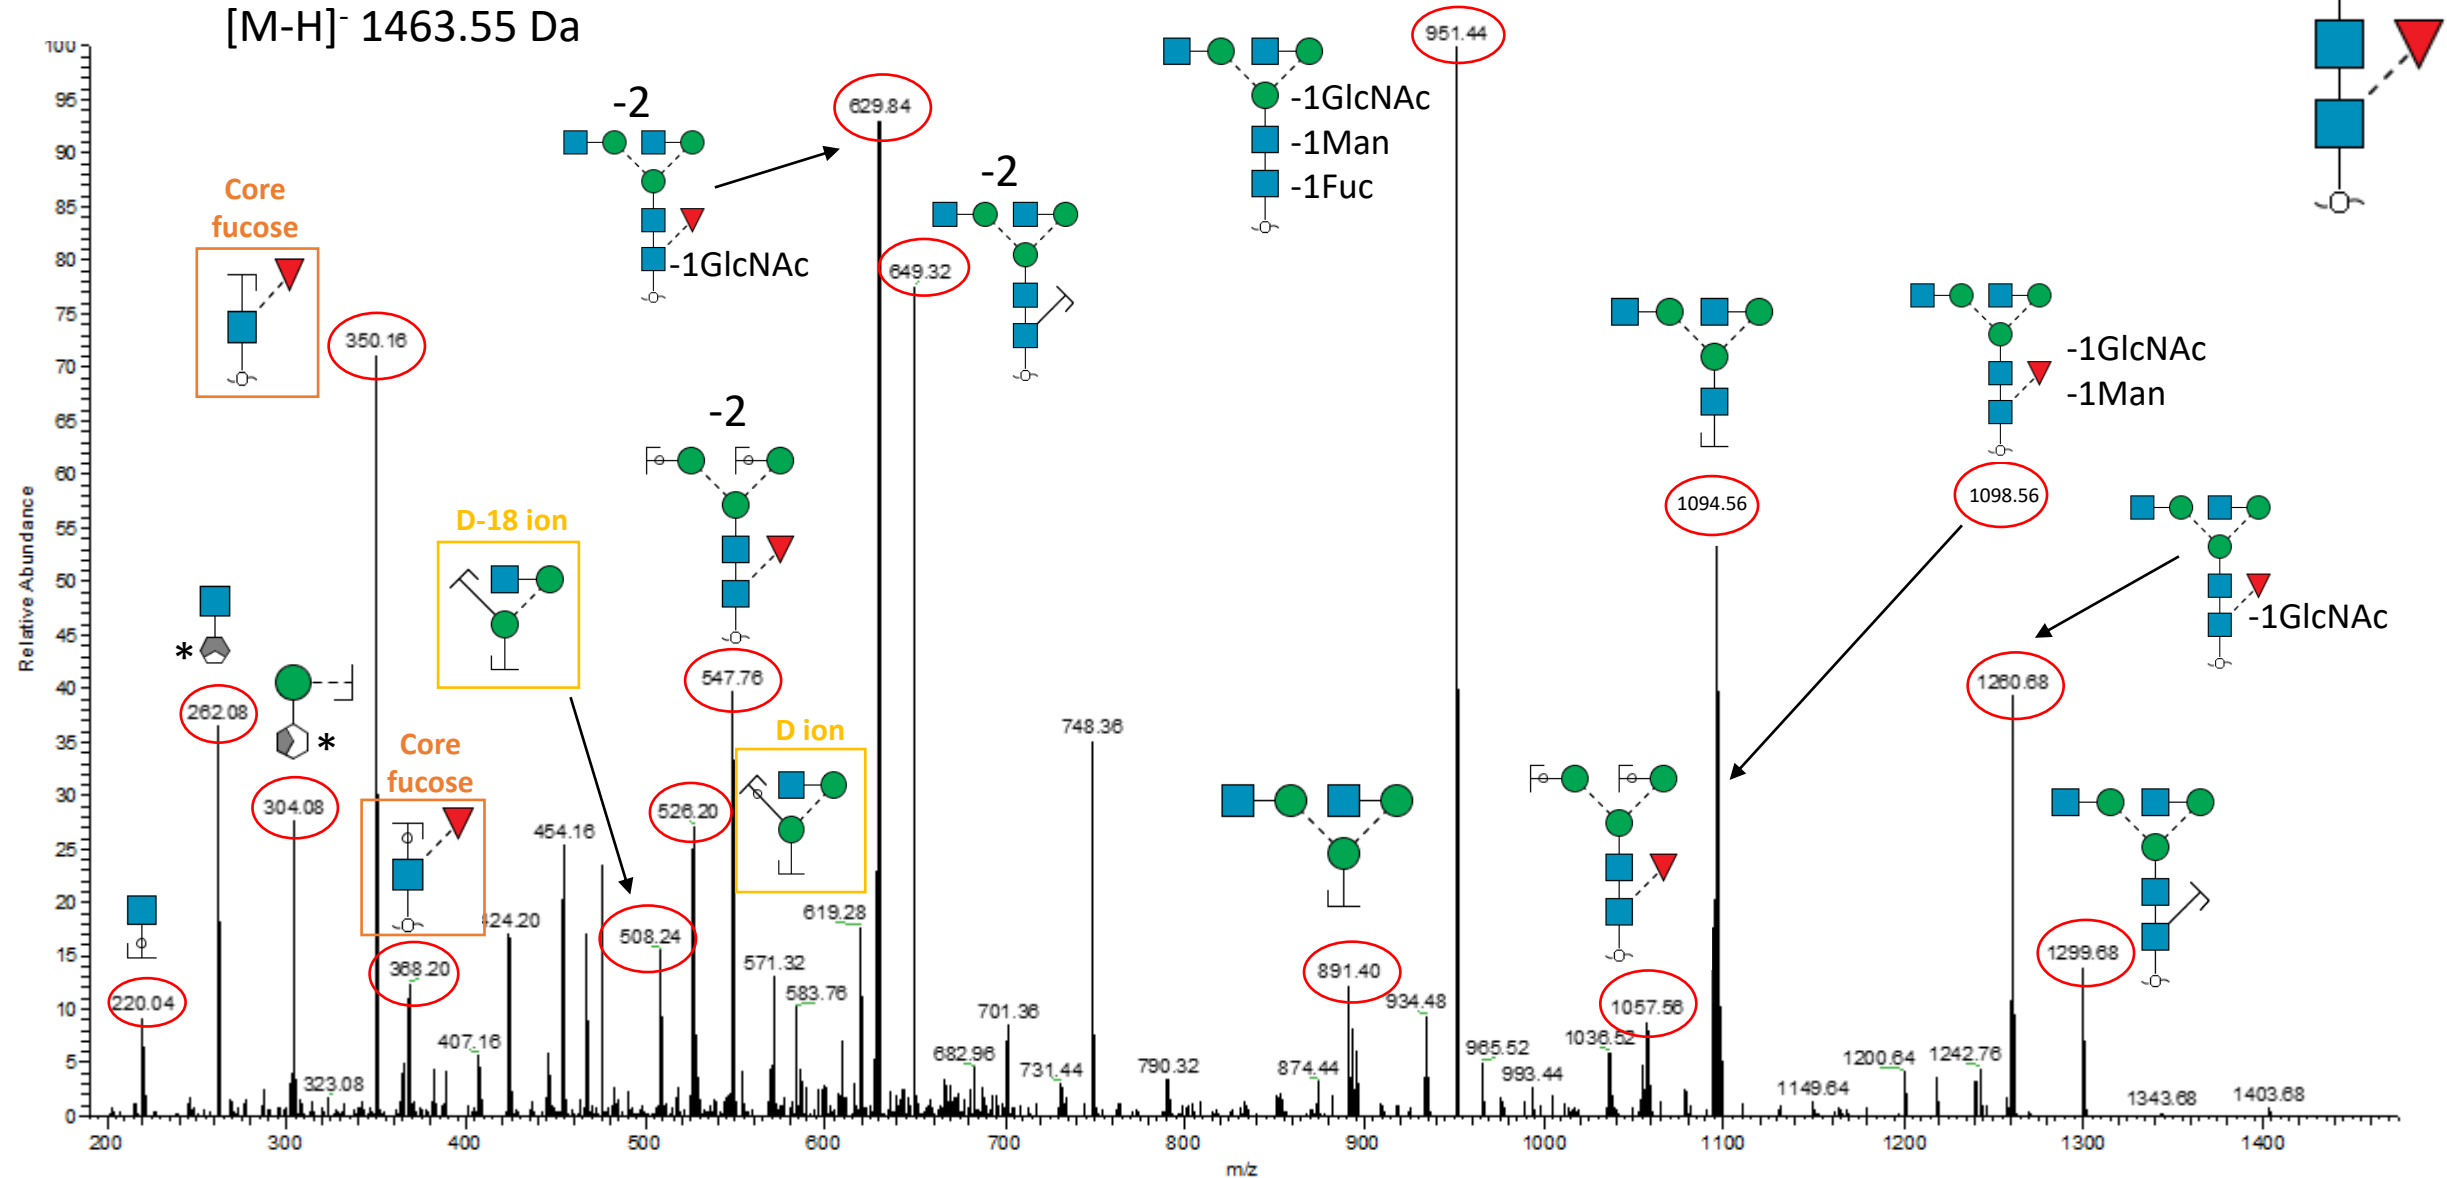

\* Ambiguity of the cross-ring fragments

Glycan #15

Observed  $m/z$  739.30 (2-), RT: ~22.3 min  
[M-H]<sup>-</sup> 1479.54 Da

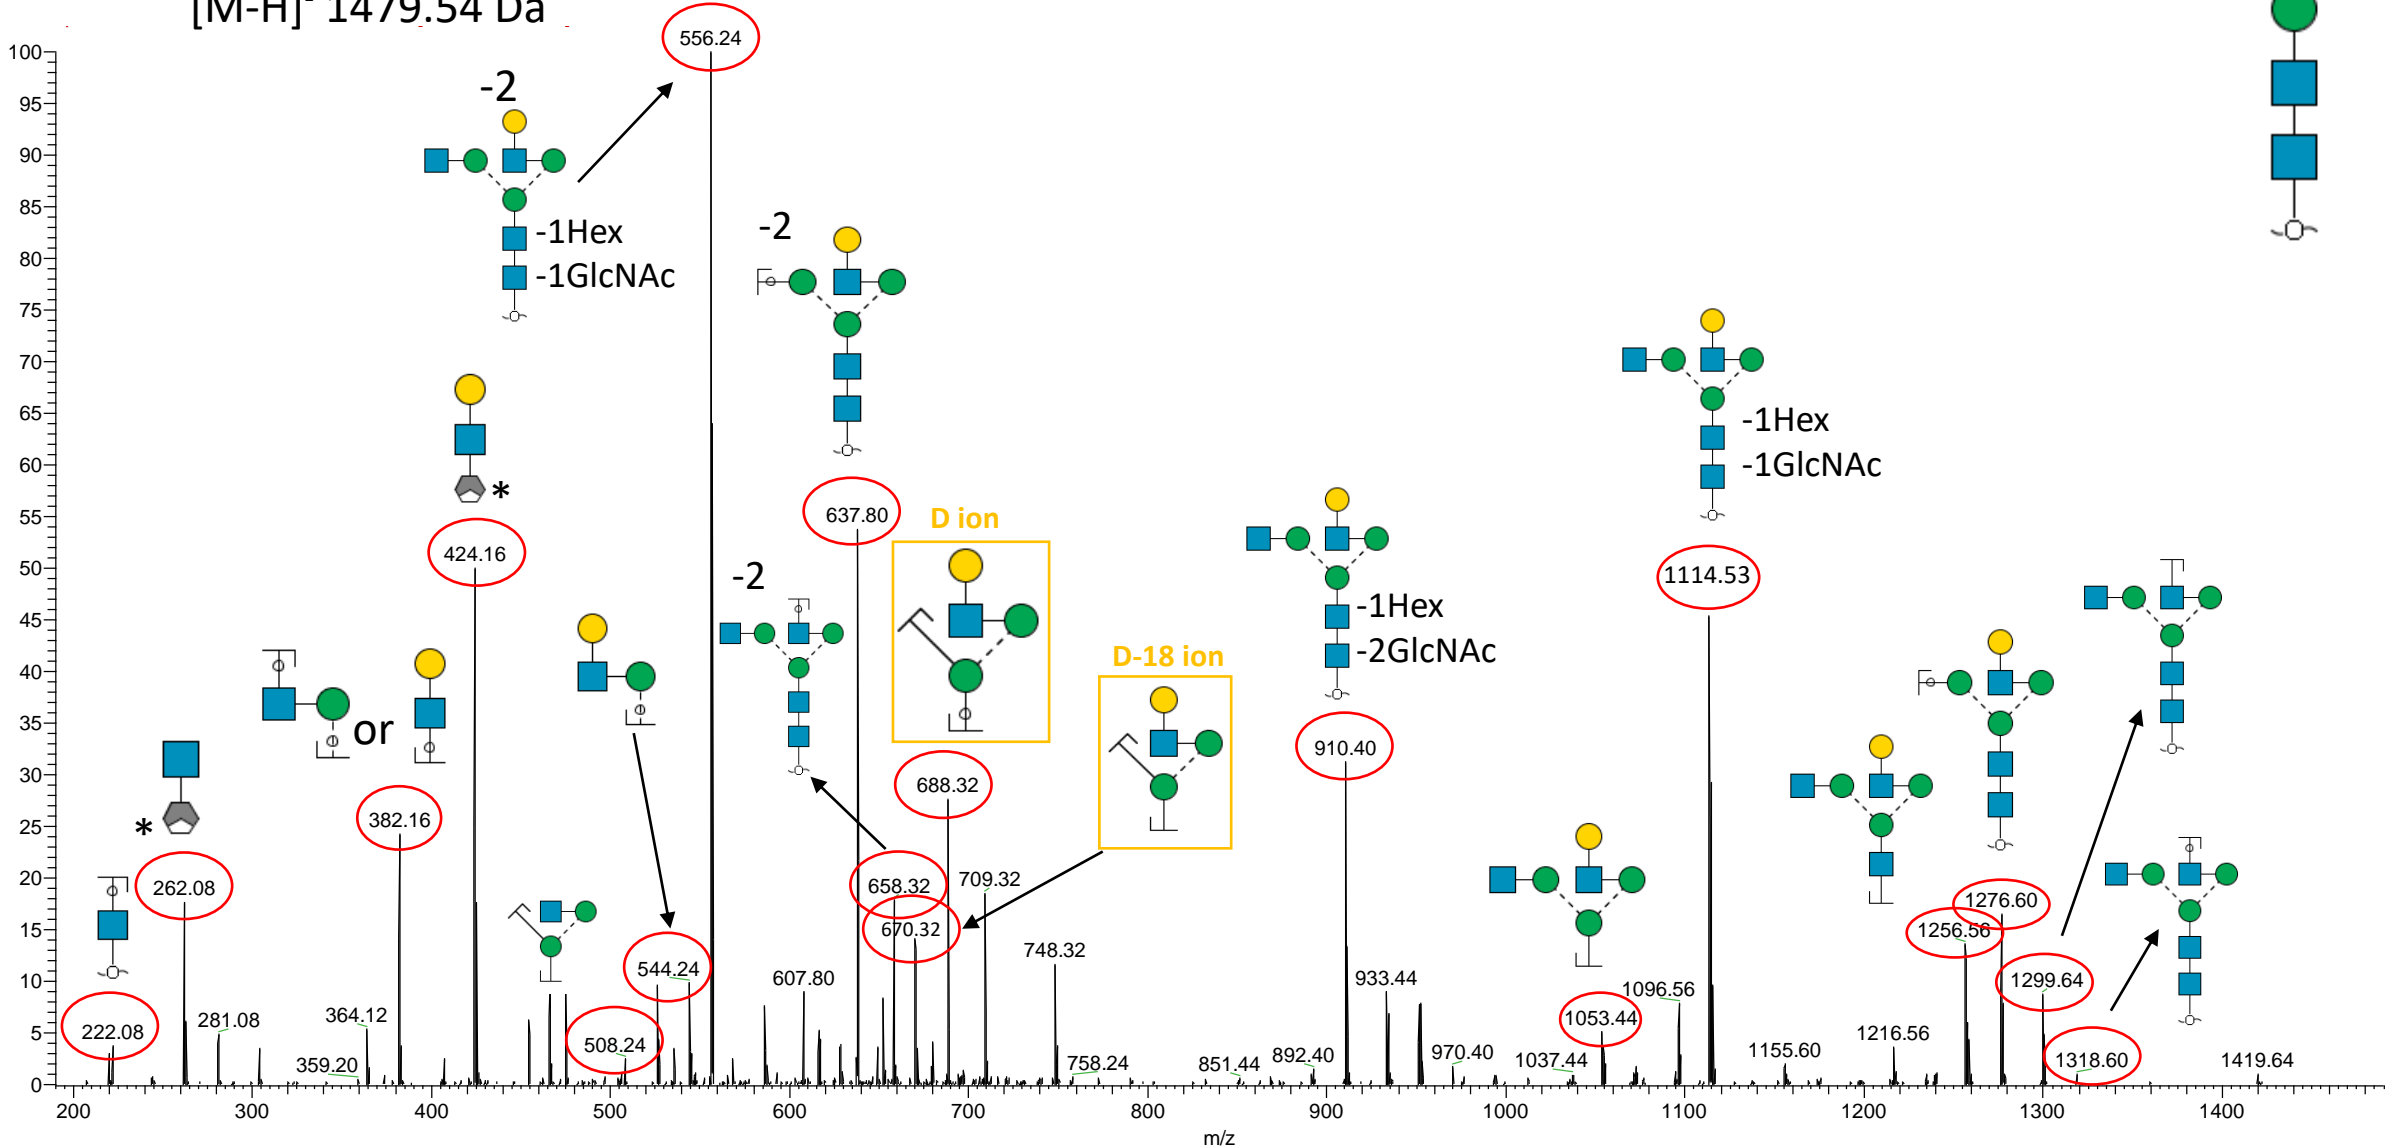

\* Ambiguity of the cross-ring fragments

Glycan #16a

Observed  $m/z$  812.32 (2-), RT: ~27.4 min  
[M-H]<sup>-</sup> 1625.60 4 Da

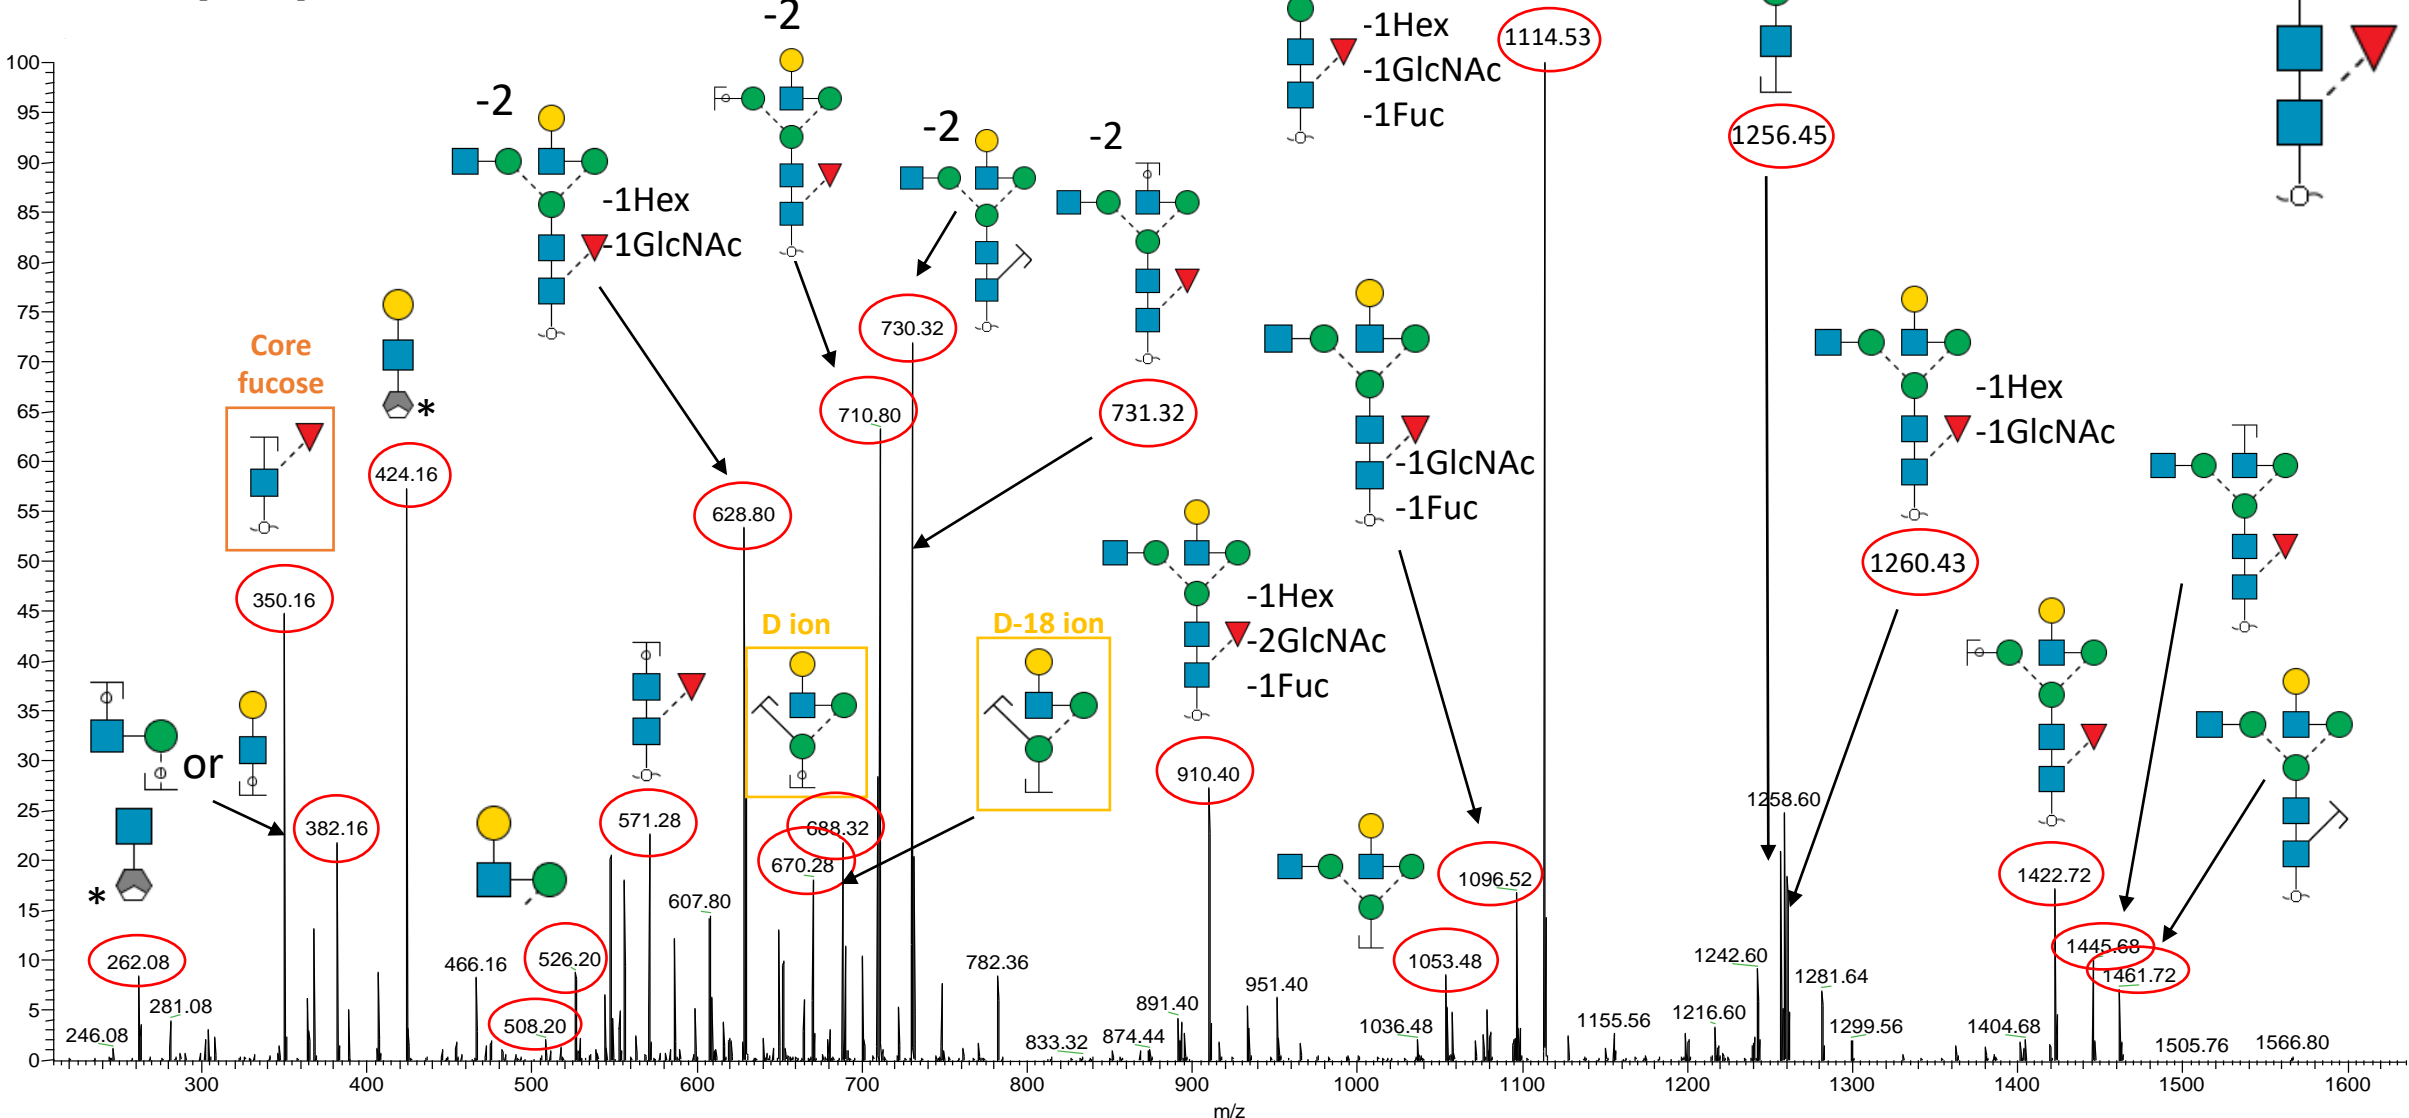

\*Ambiguity of the cross-ring fragments

Glycan #16b

Observed  $m/z$  812.32 (2-), RT: ~28.8 min

$[M-H]^-$  1625.60 Da

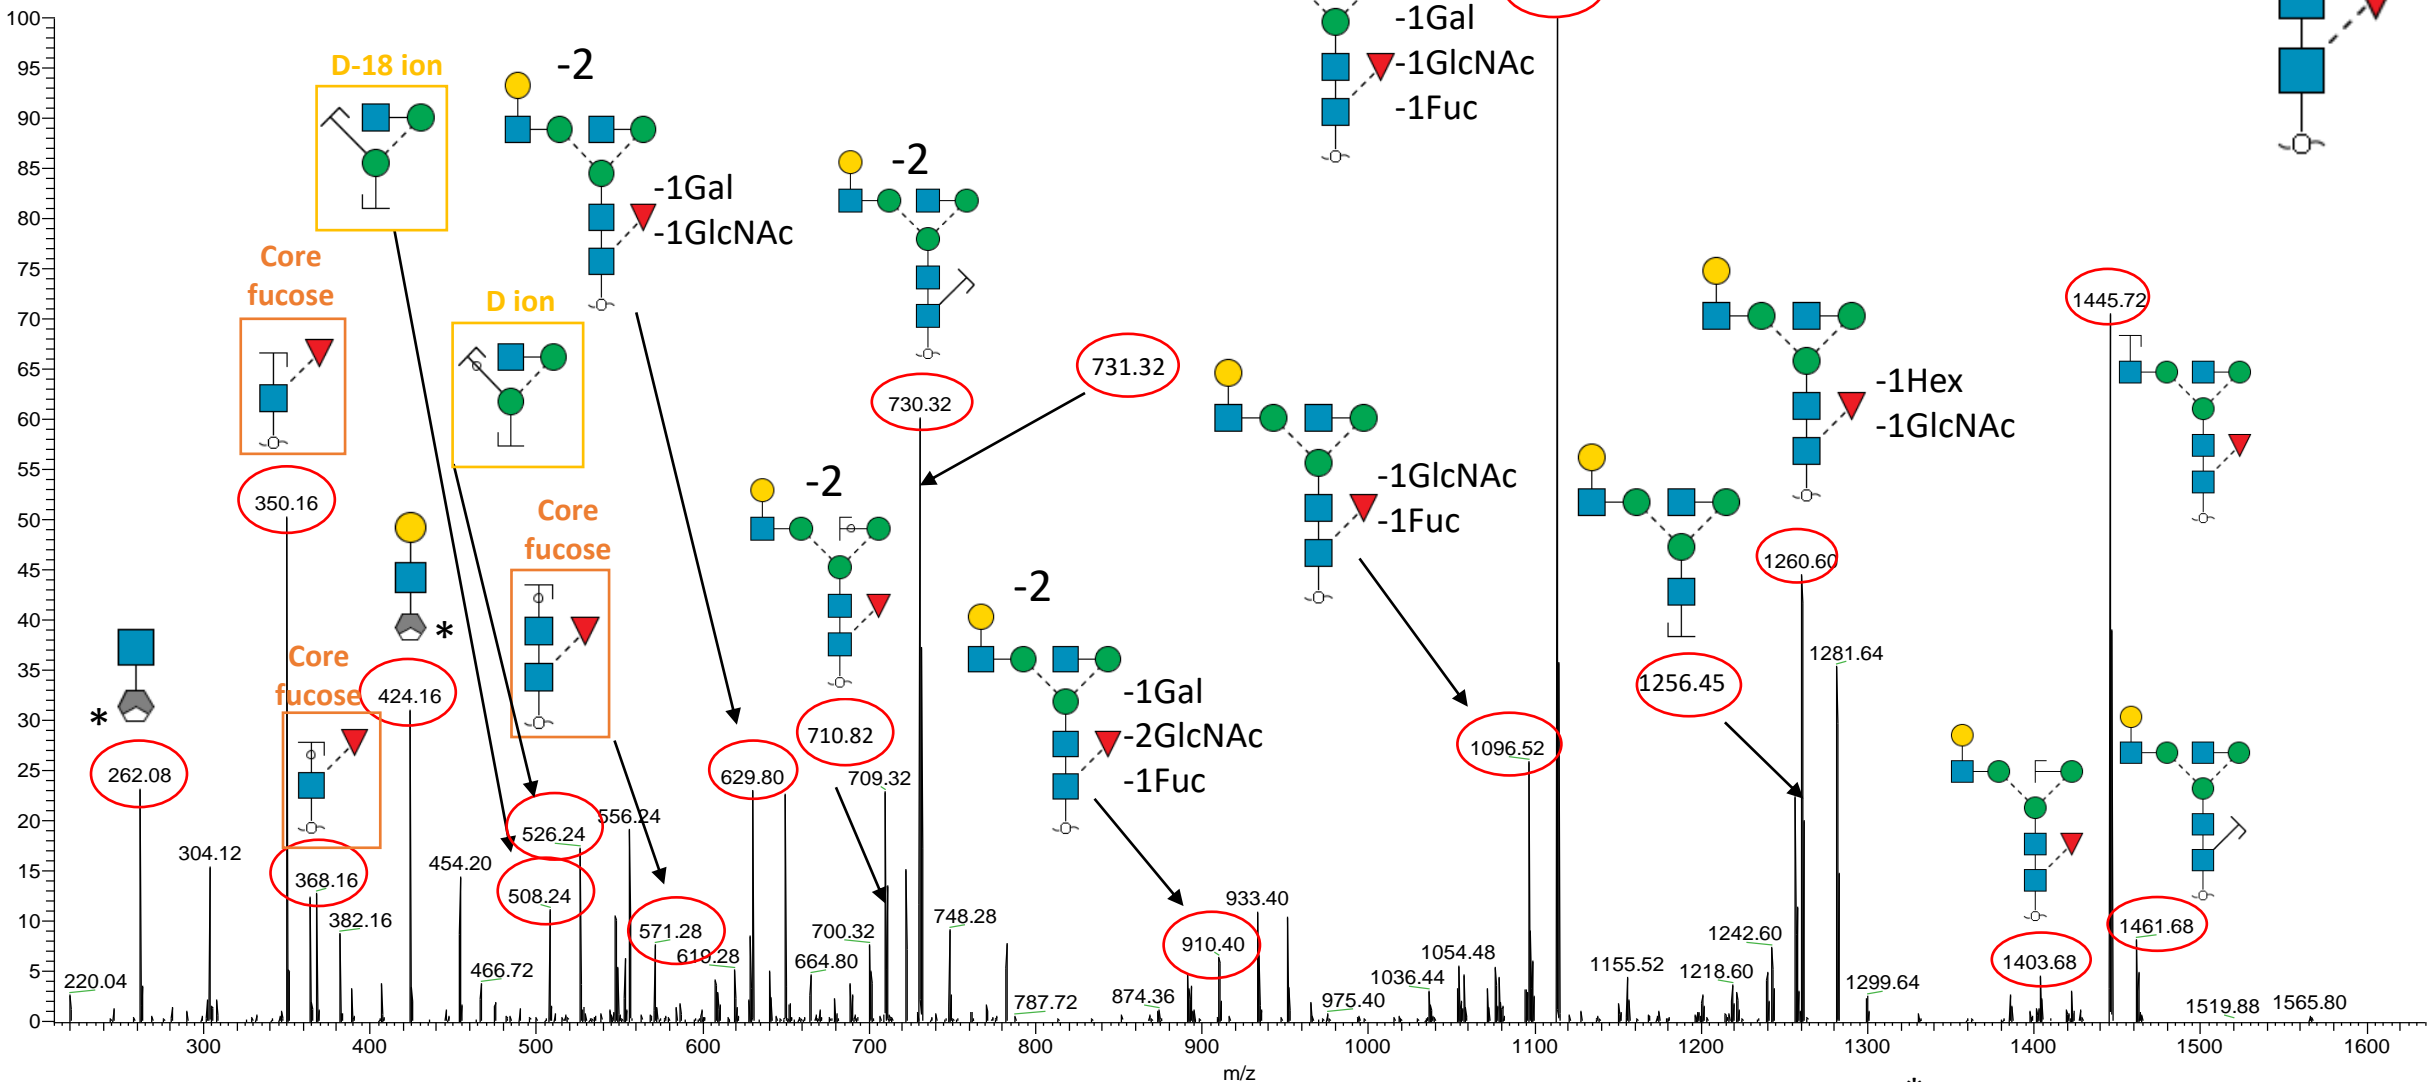

\*Ambiguity of the cross-ring fragments

Glycan #17a

Observed  $m/z$  884.84 (2-), RT: ~23.9 min  
[M-H]<sup>-</sup> 1770.64 Da

Note: Based on PGC-LC elution pattern, this glycan is annotated as the  $\alpha$ 2,6-sialyl linkage isomer.

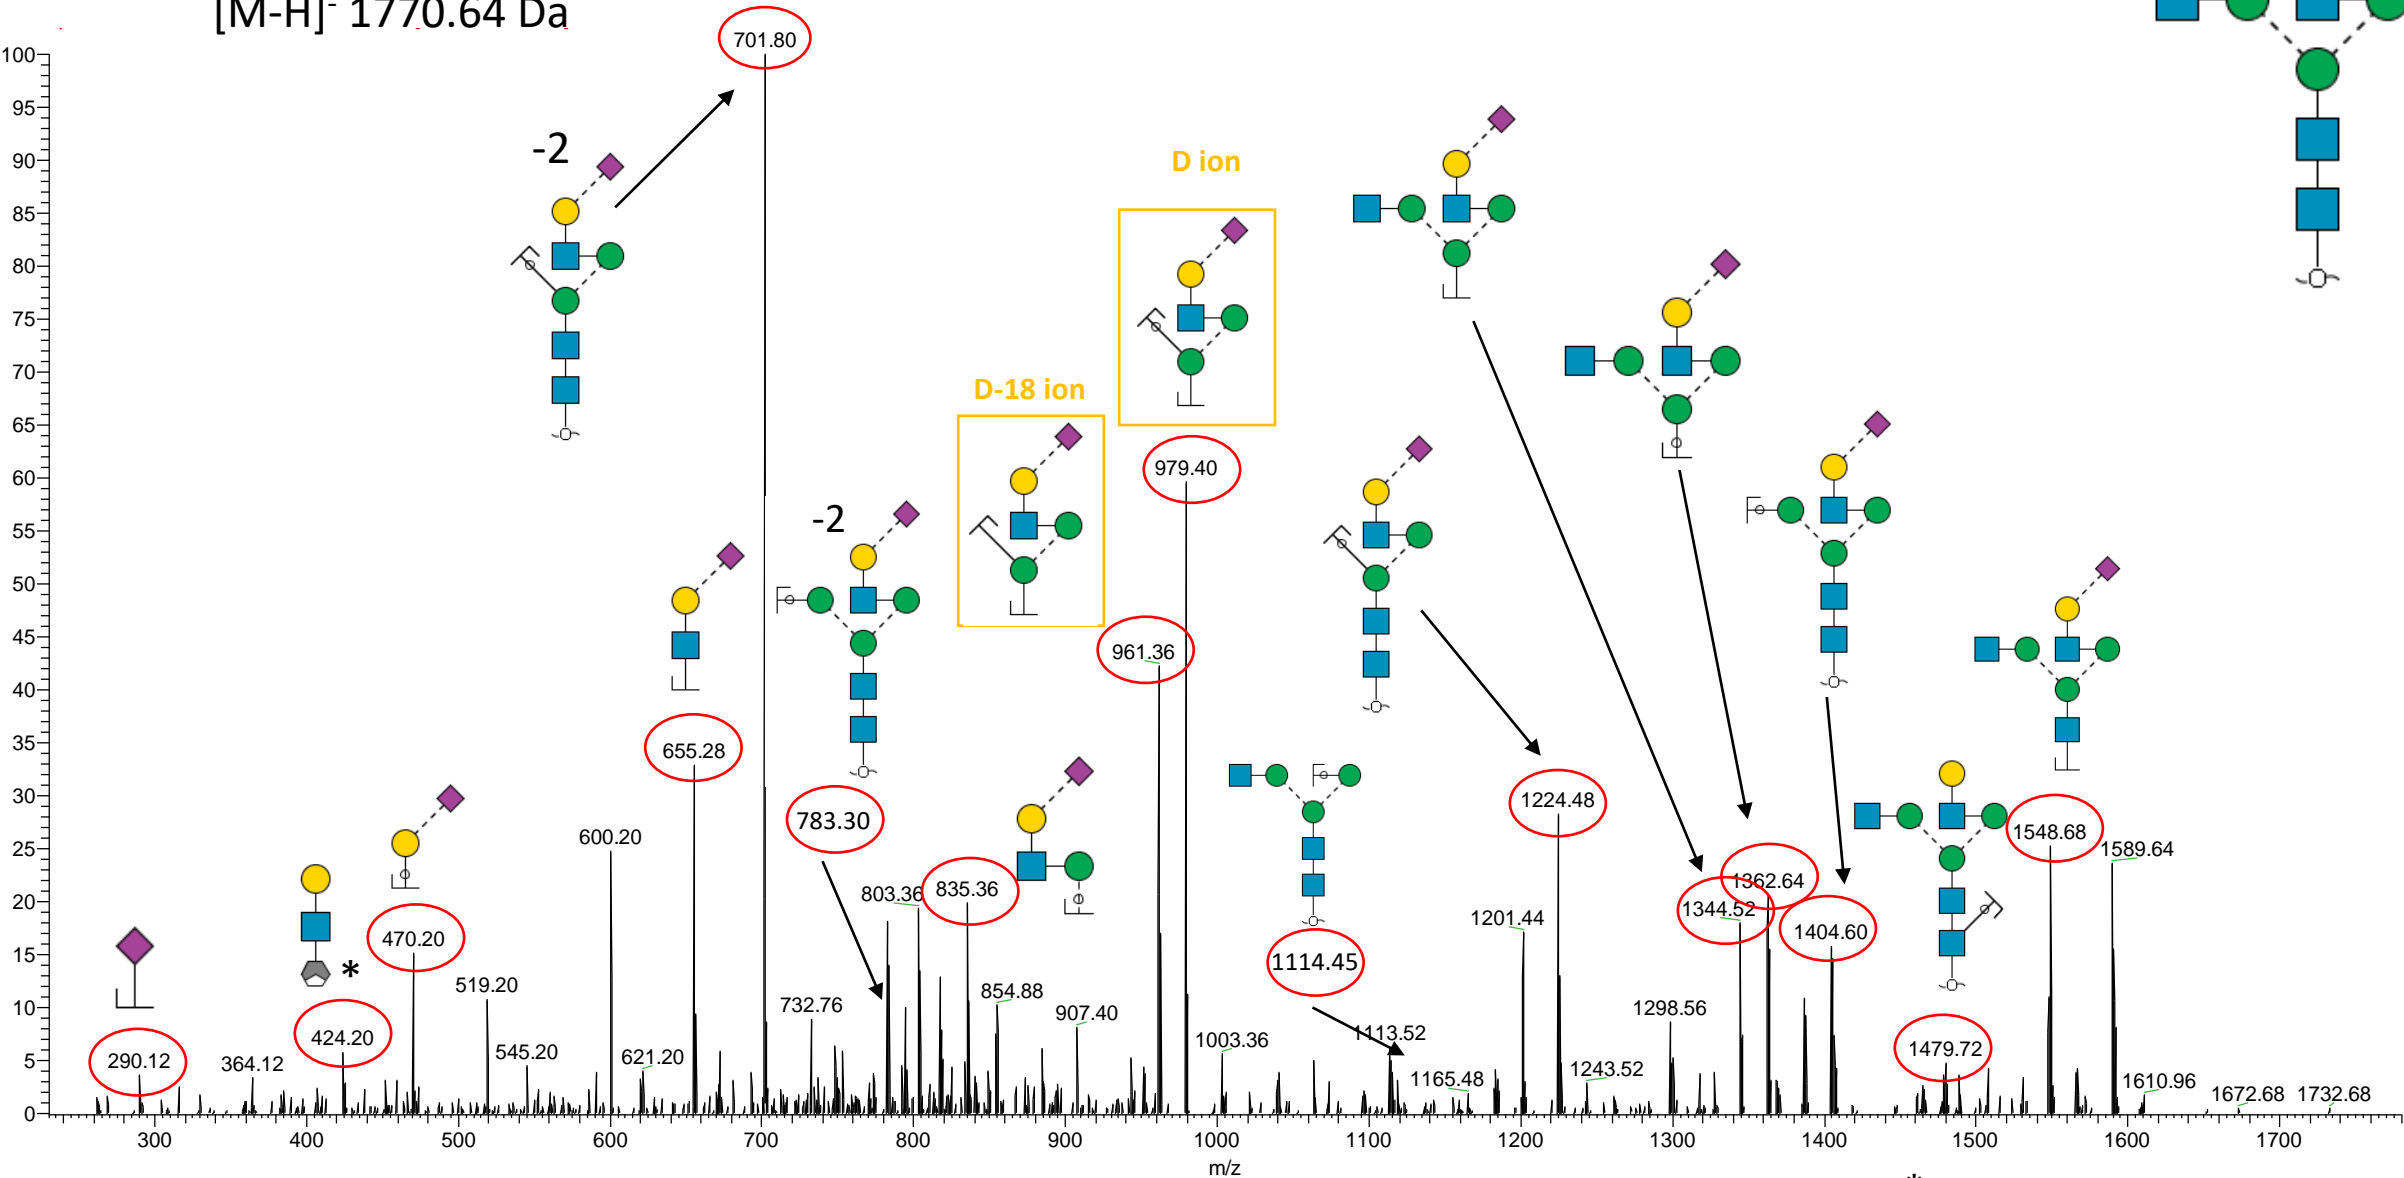

Glycan #17b

Observed  $m/z$  884.84 (2-), RT: ~25.2 min  
[M-H]<sup>-</sup> 1625.60 Da

Note: Based on PGC-LC elution pattern, this glycan is annotated as the  $\alpha$ 2,6-sialyl linkage isomer.

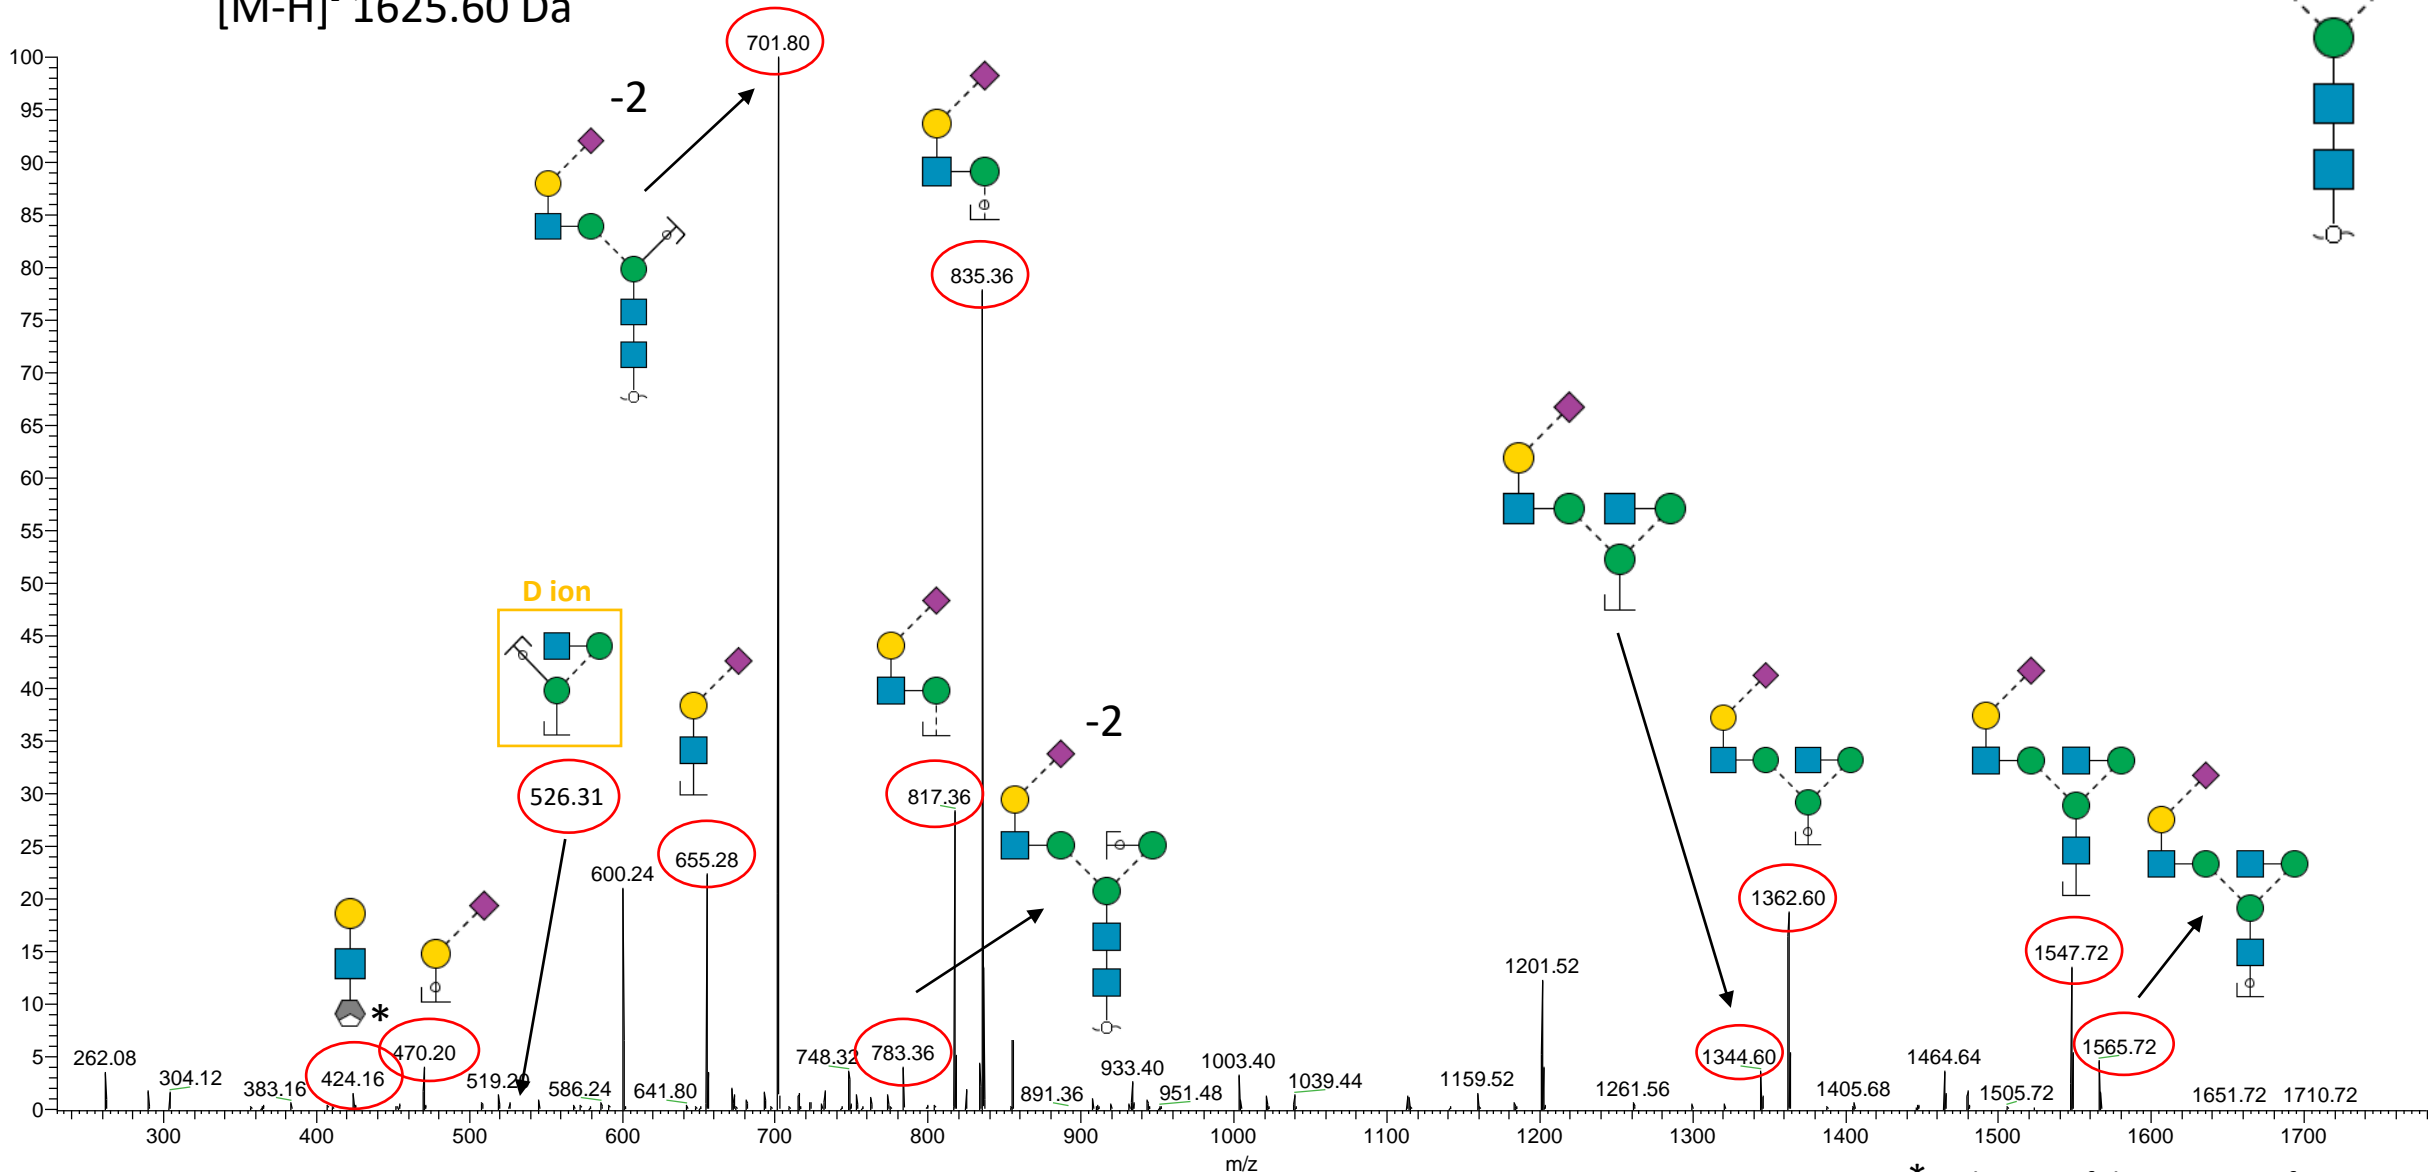

\*Ambiguity of the cross-ring fragments

# Glycan #18

Observed  $m/z$  957.88 (2-), RT: ~29.3 min  
[M-H]<sup>-</sup> 1916.70 Da

Note: Based on PGC-LC elution pattern, this glycan is annotated as the  $\alpha$ 2,6-sialyl linkage isomer.

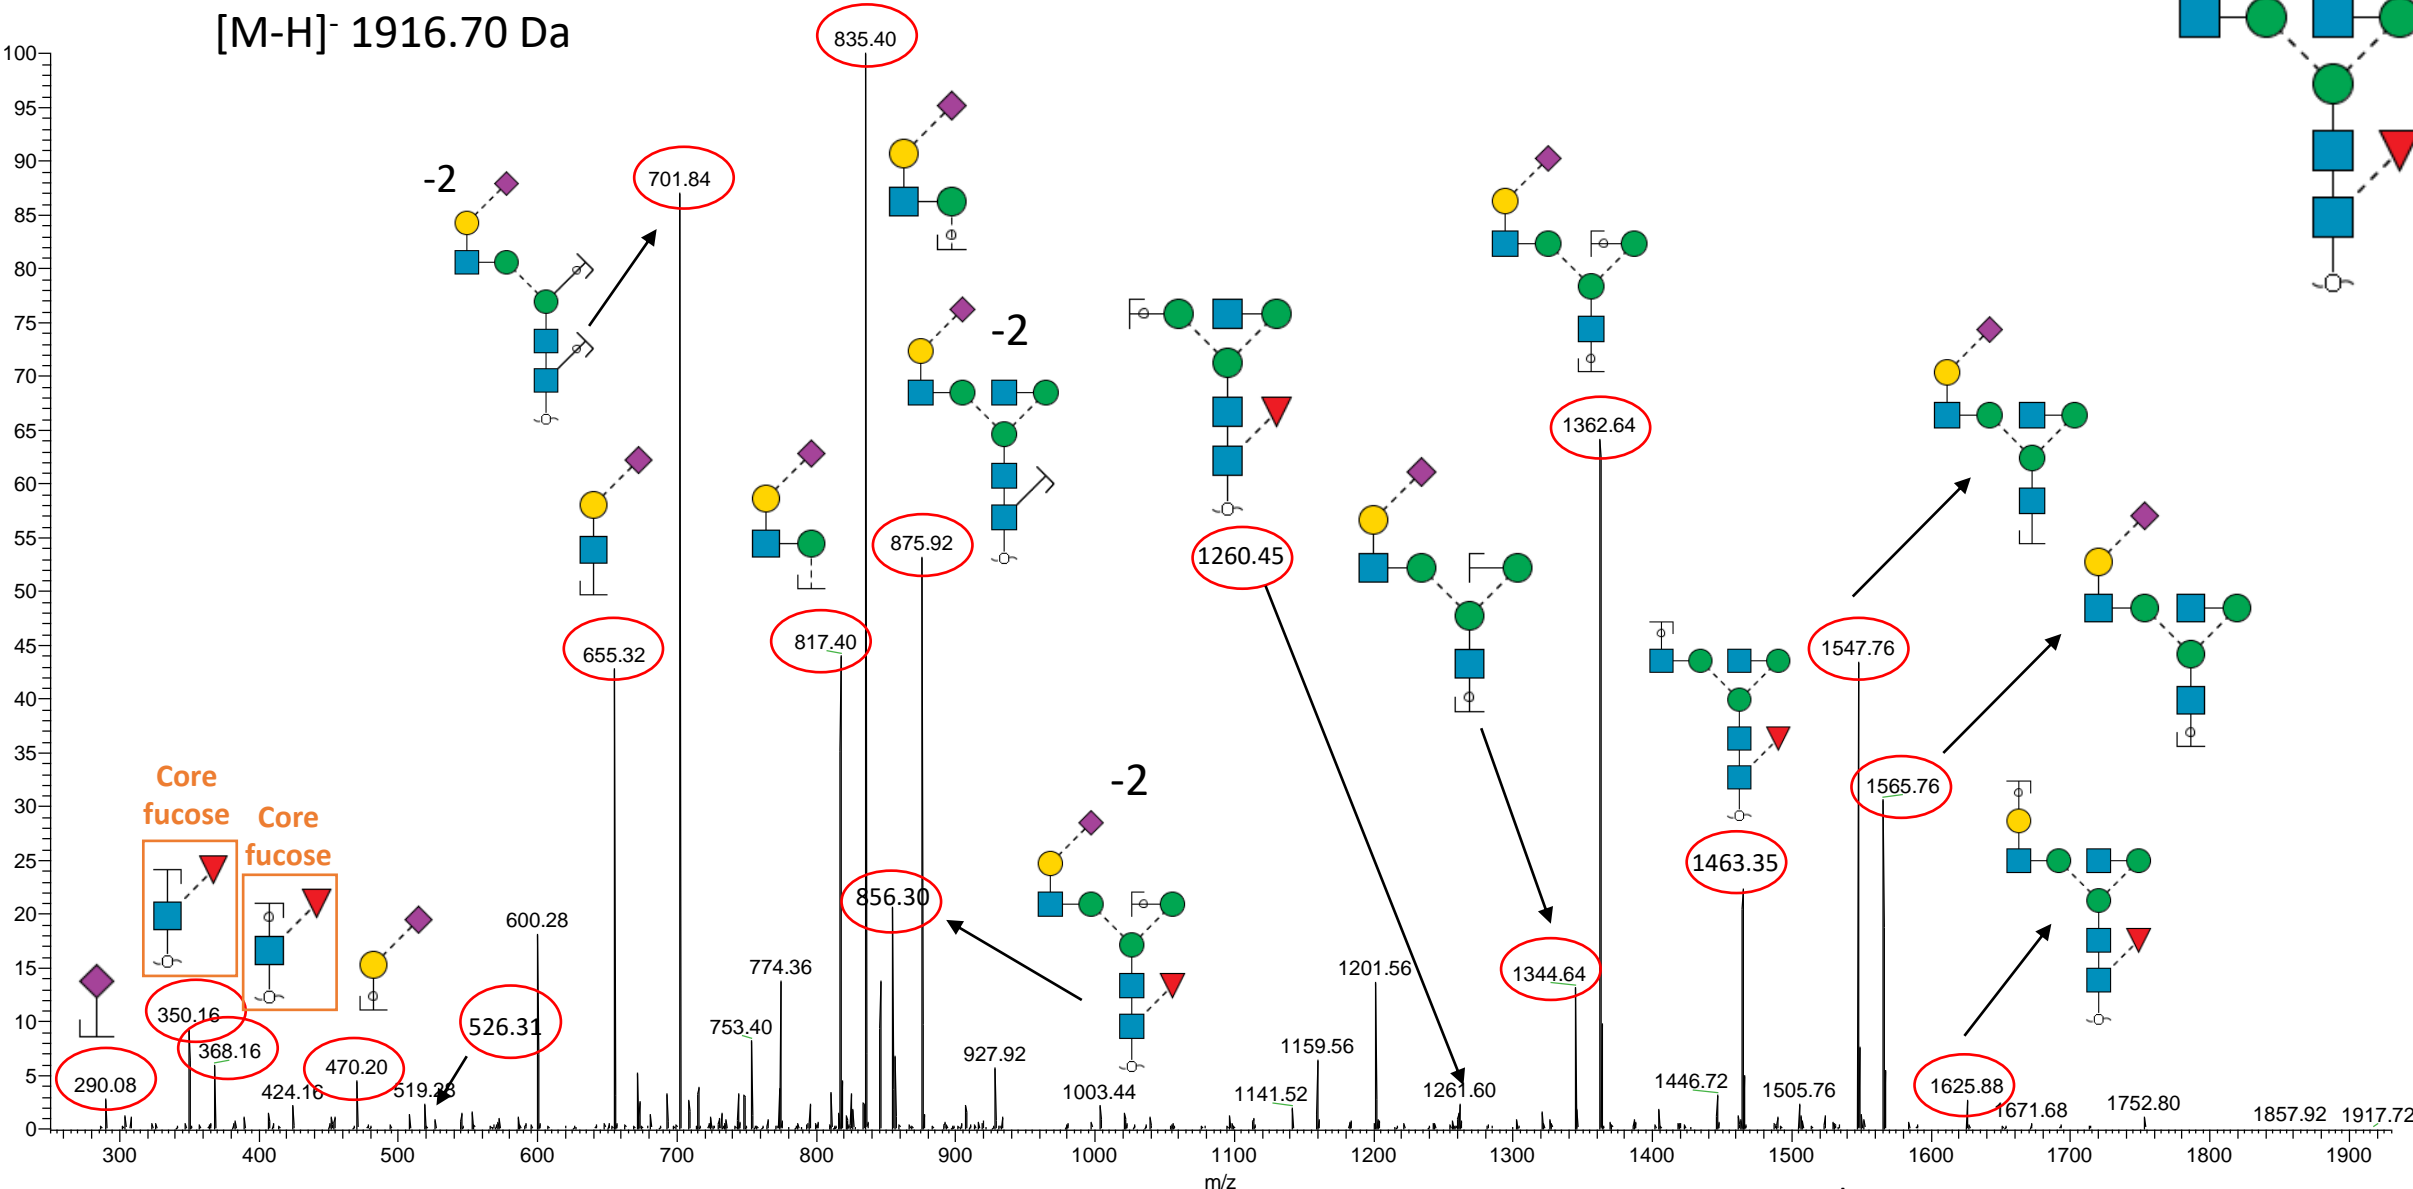

\*Ambiguity of the cross-ring fragments

Glycan #19

Observed  $m/z$  820.32 (2-), RT: ~25.6 min

$[M-H]^-$  1641.60 Da

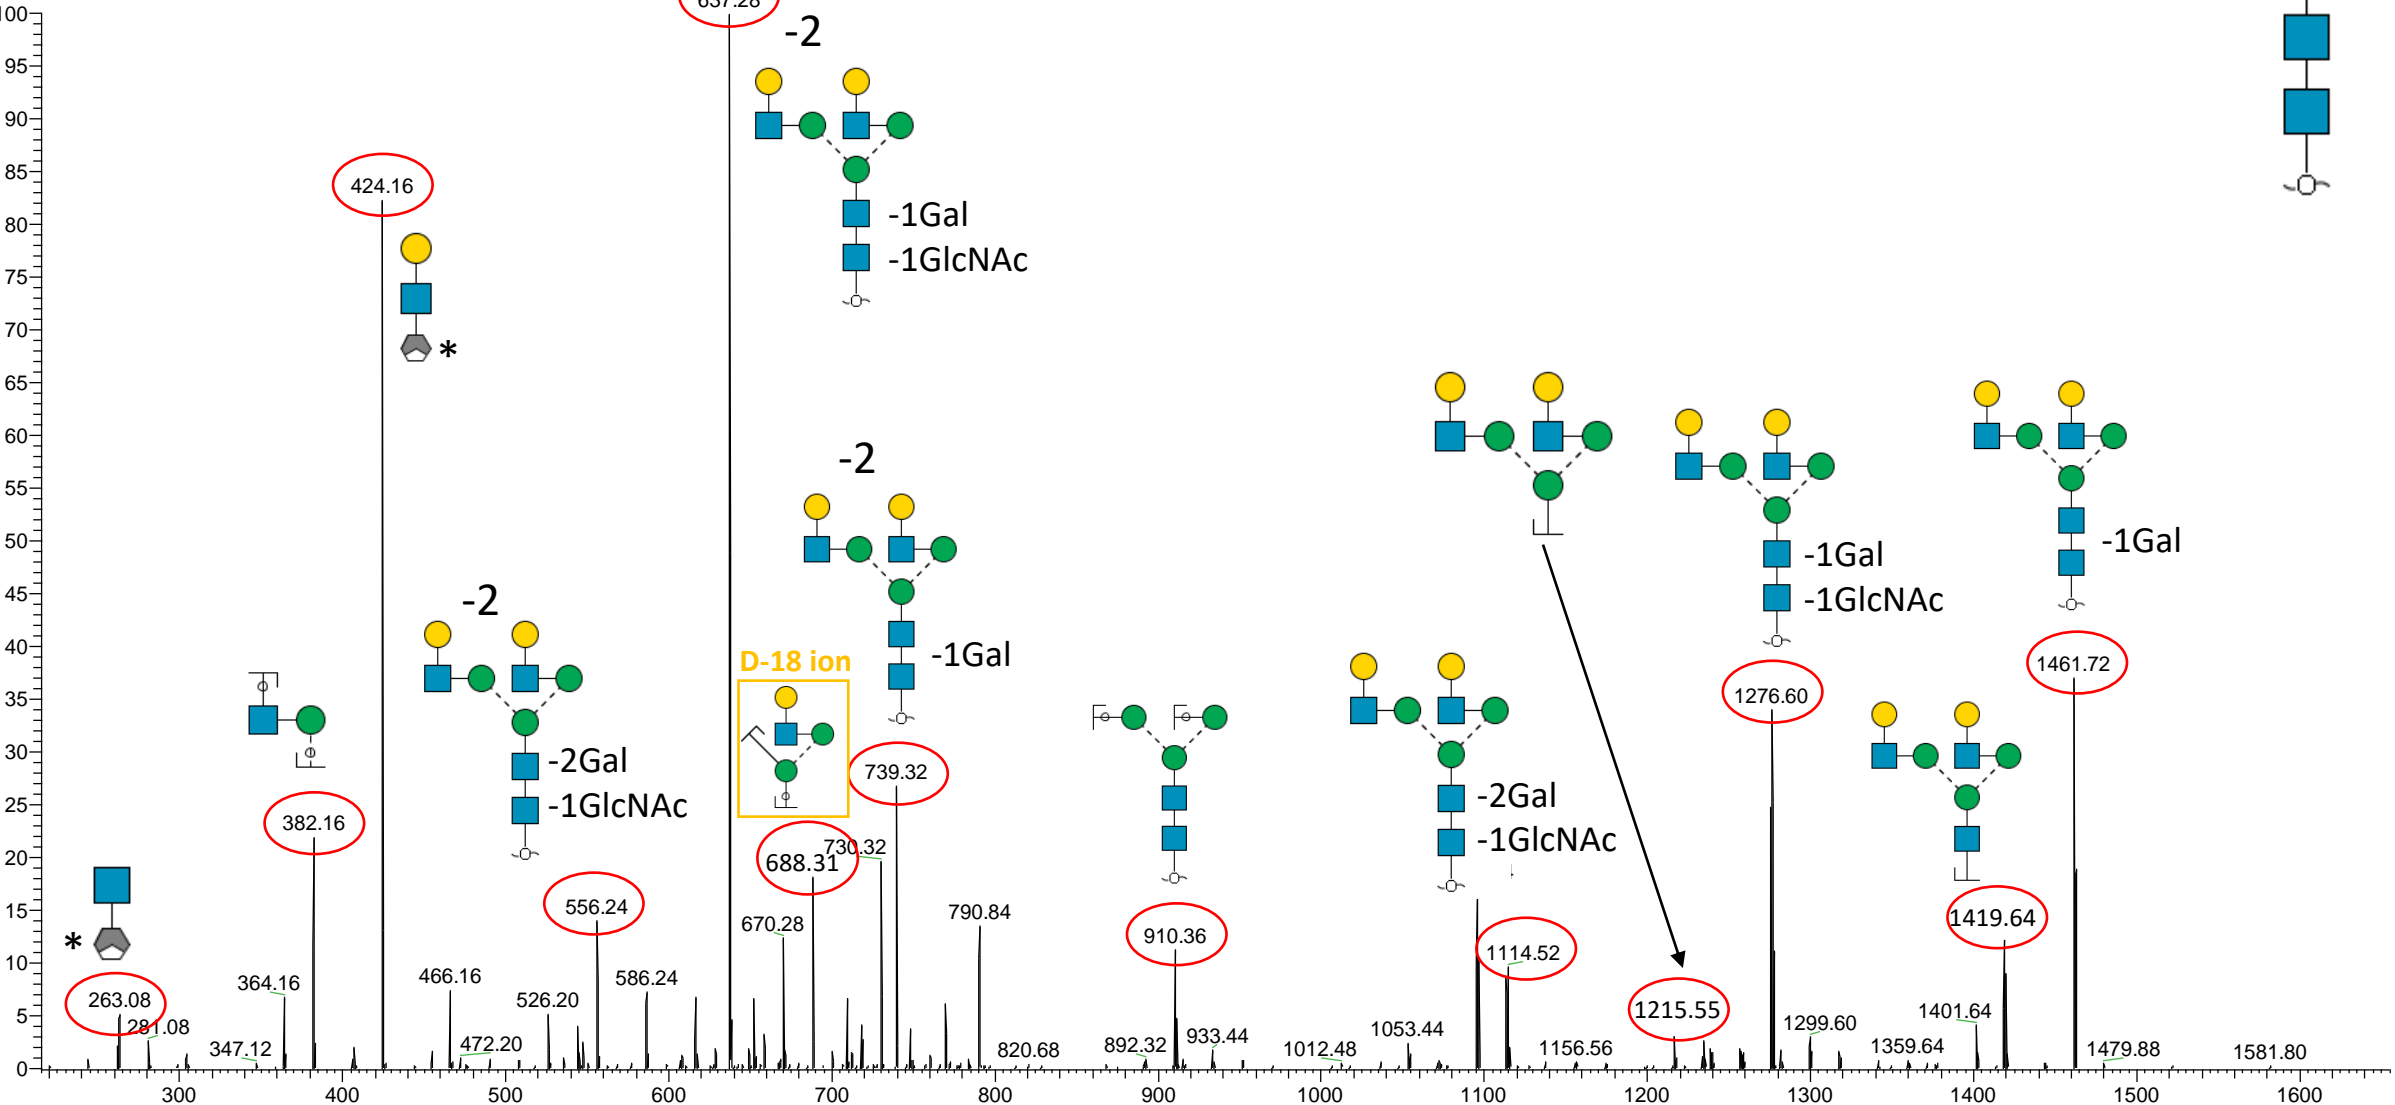

\* Ambiguity of the cross-ring fragments



Glycan #20

Observed  $m/z$  893.36 (2-), RT: ~28.7 min  
[M-H]<sup>-</sup> 1787.65 Da

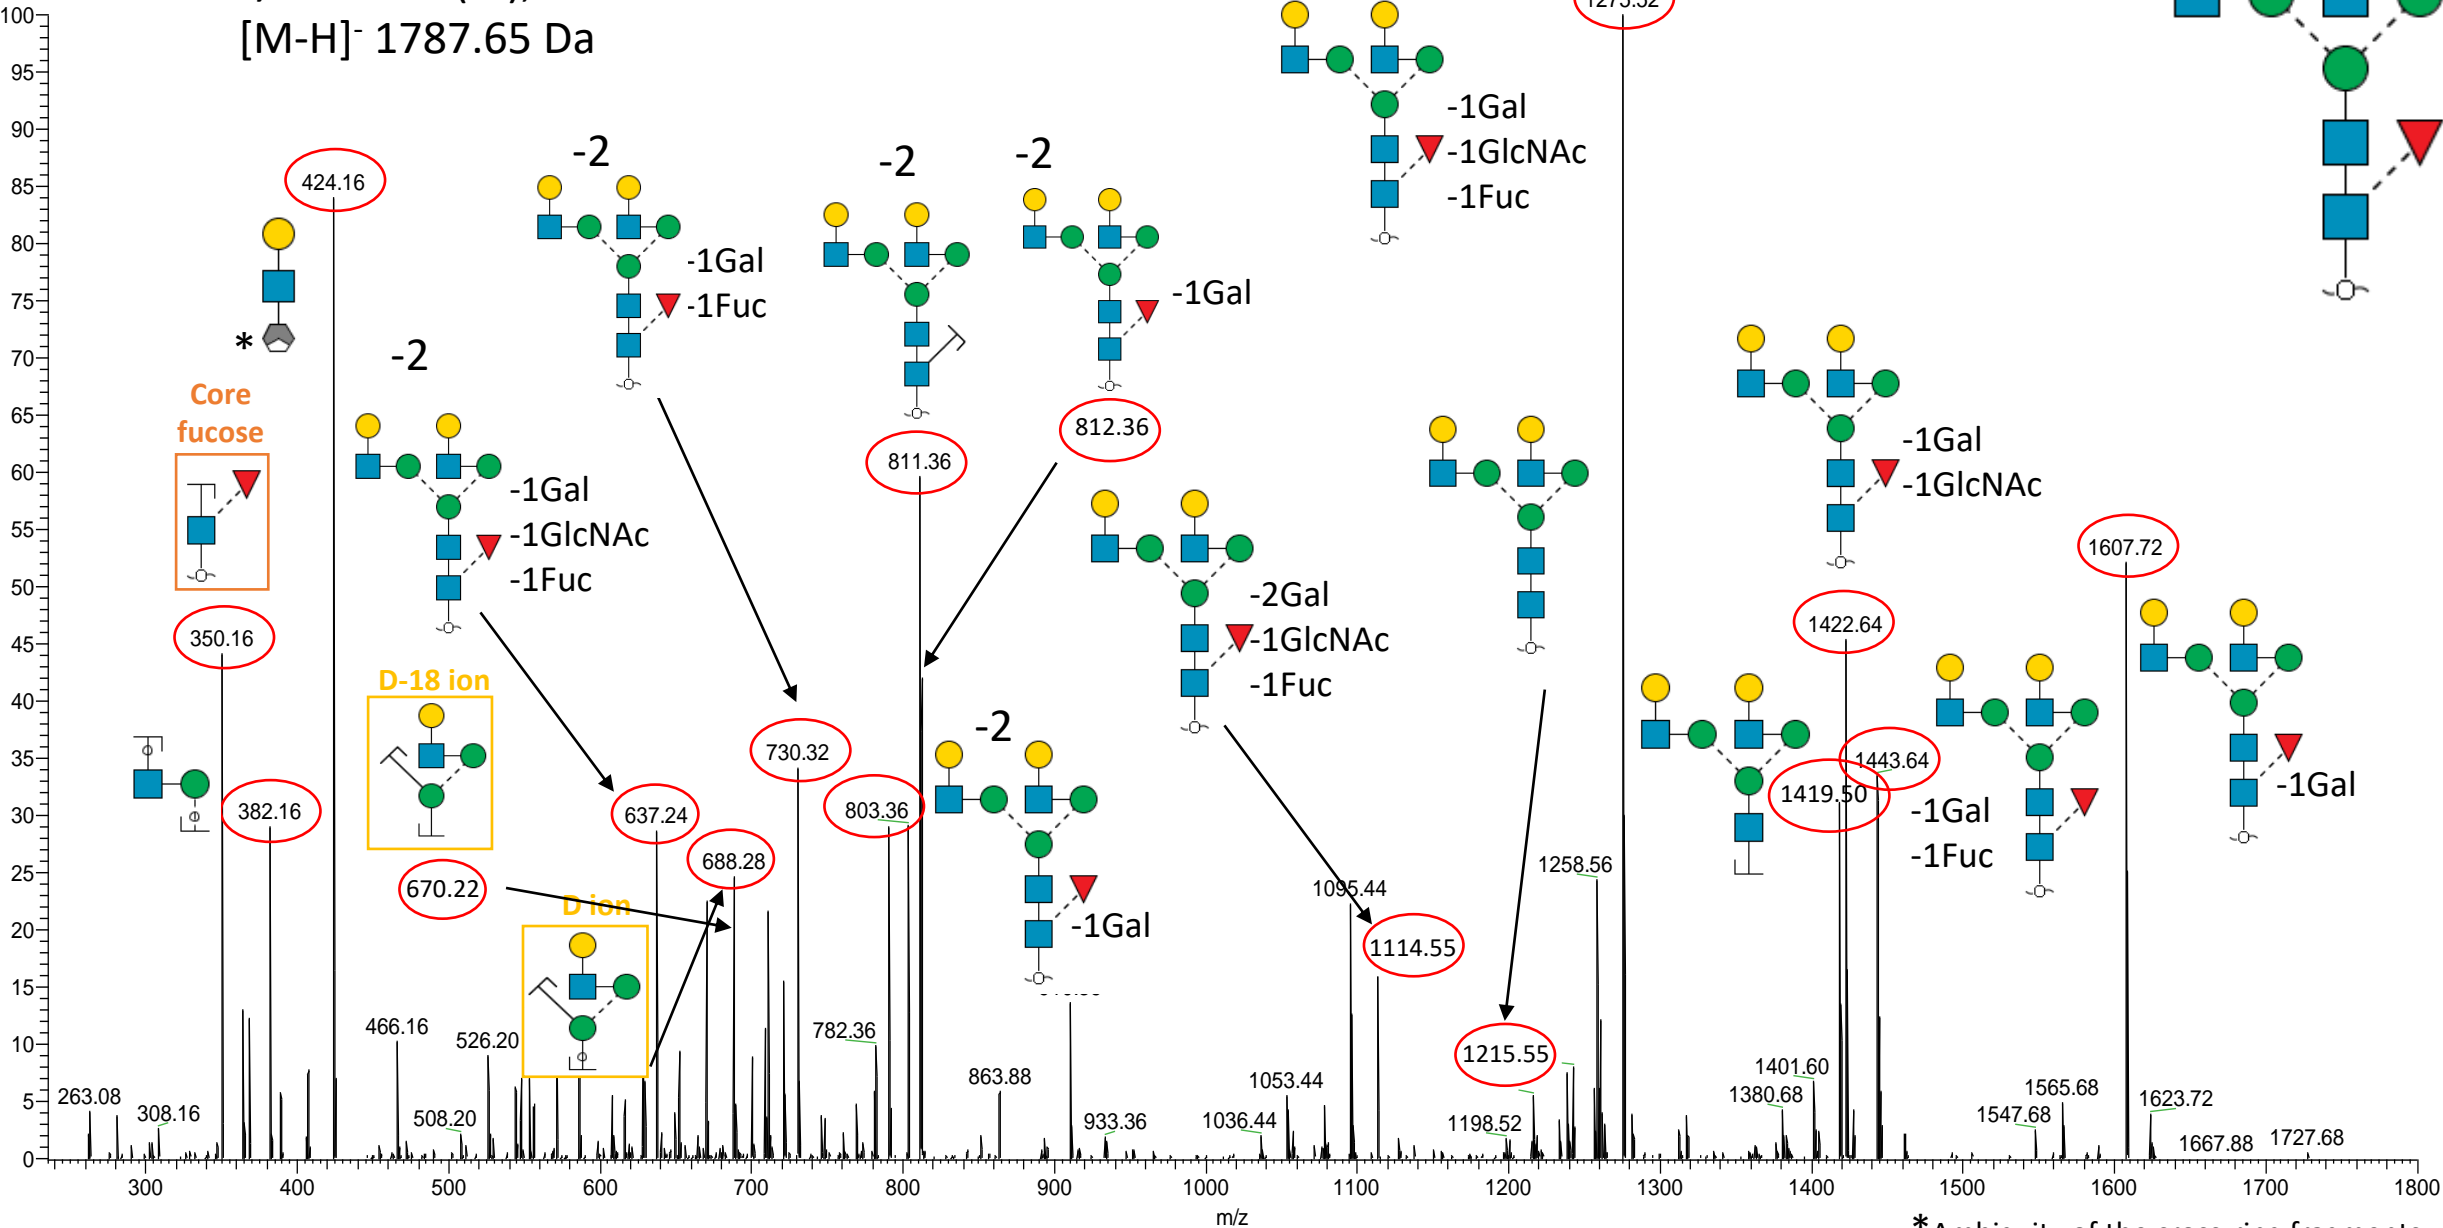

\* Ambiguity of the cross-ring fragments

Glycan #21

Observed  $m/z$  965.88 (2-), RT: ~25.2 min  
[M-H]<sup>-</sup> 1932.69 Da

Note: Based on PGC-LC elution pattern, this glycan is annotated as the  $\alpha$ 2,6-sialyl linkage isomer.

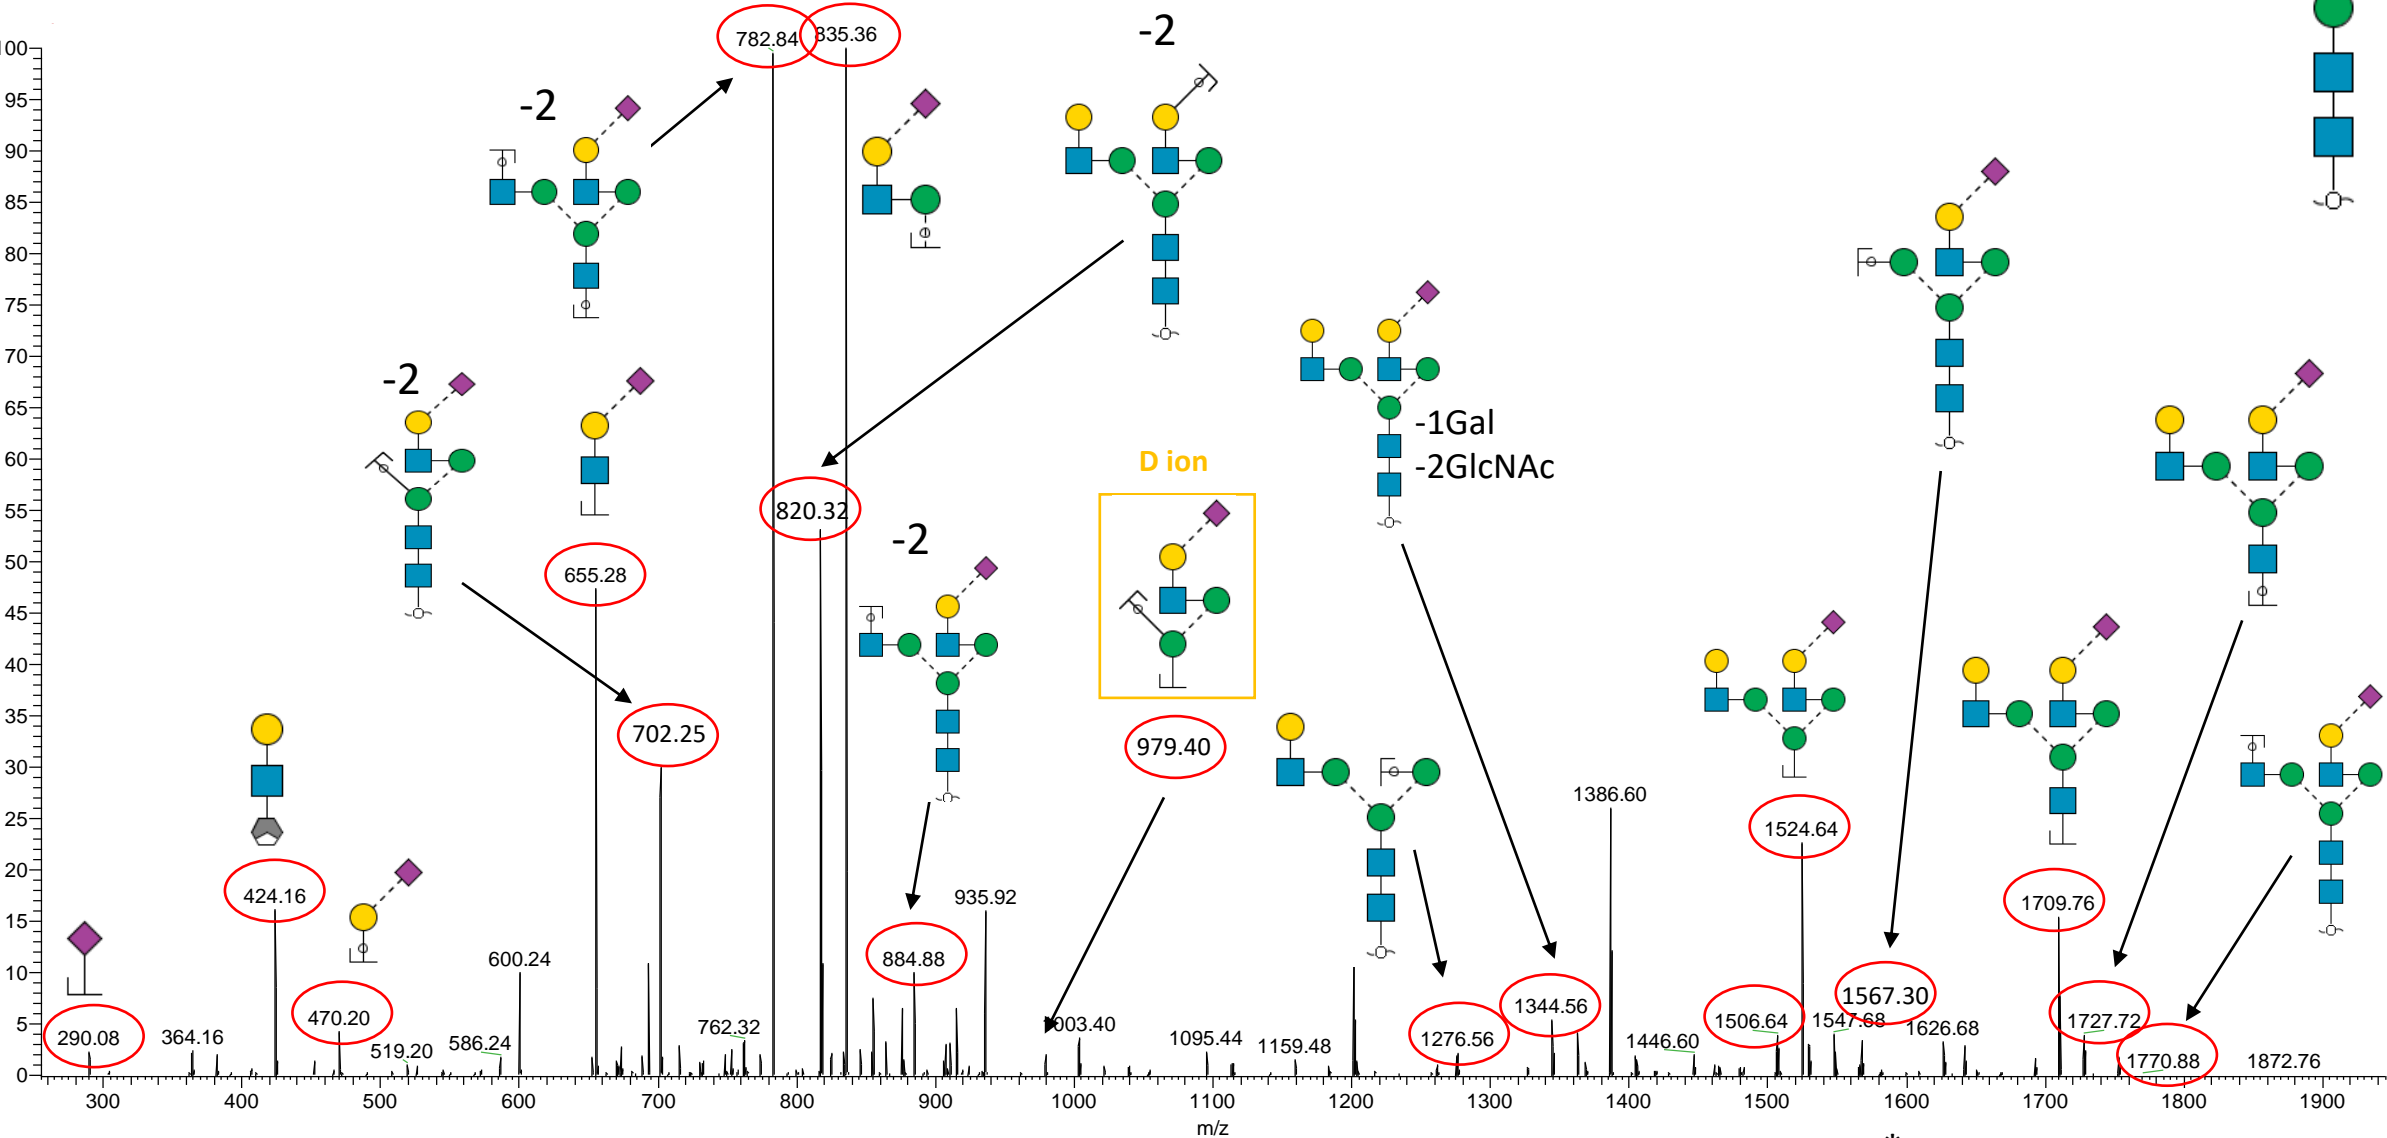

\* Ambiguity of the cross-ring fragments

Glycan #22a

Observed  $m/z$  1038.90 (2-), RT: ~30.7 min  
[M-H]<sup>-</sup> 2078.75 Da

Note: Based on PGC-LC elution pattern, this glycan is annotated as the  $\alpha$ 2,6-sialyl linkage isomer.

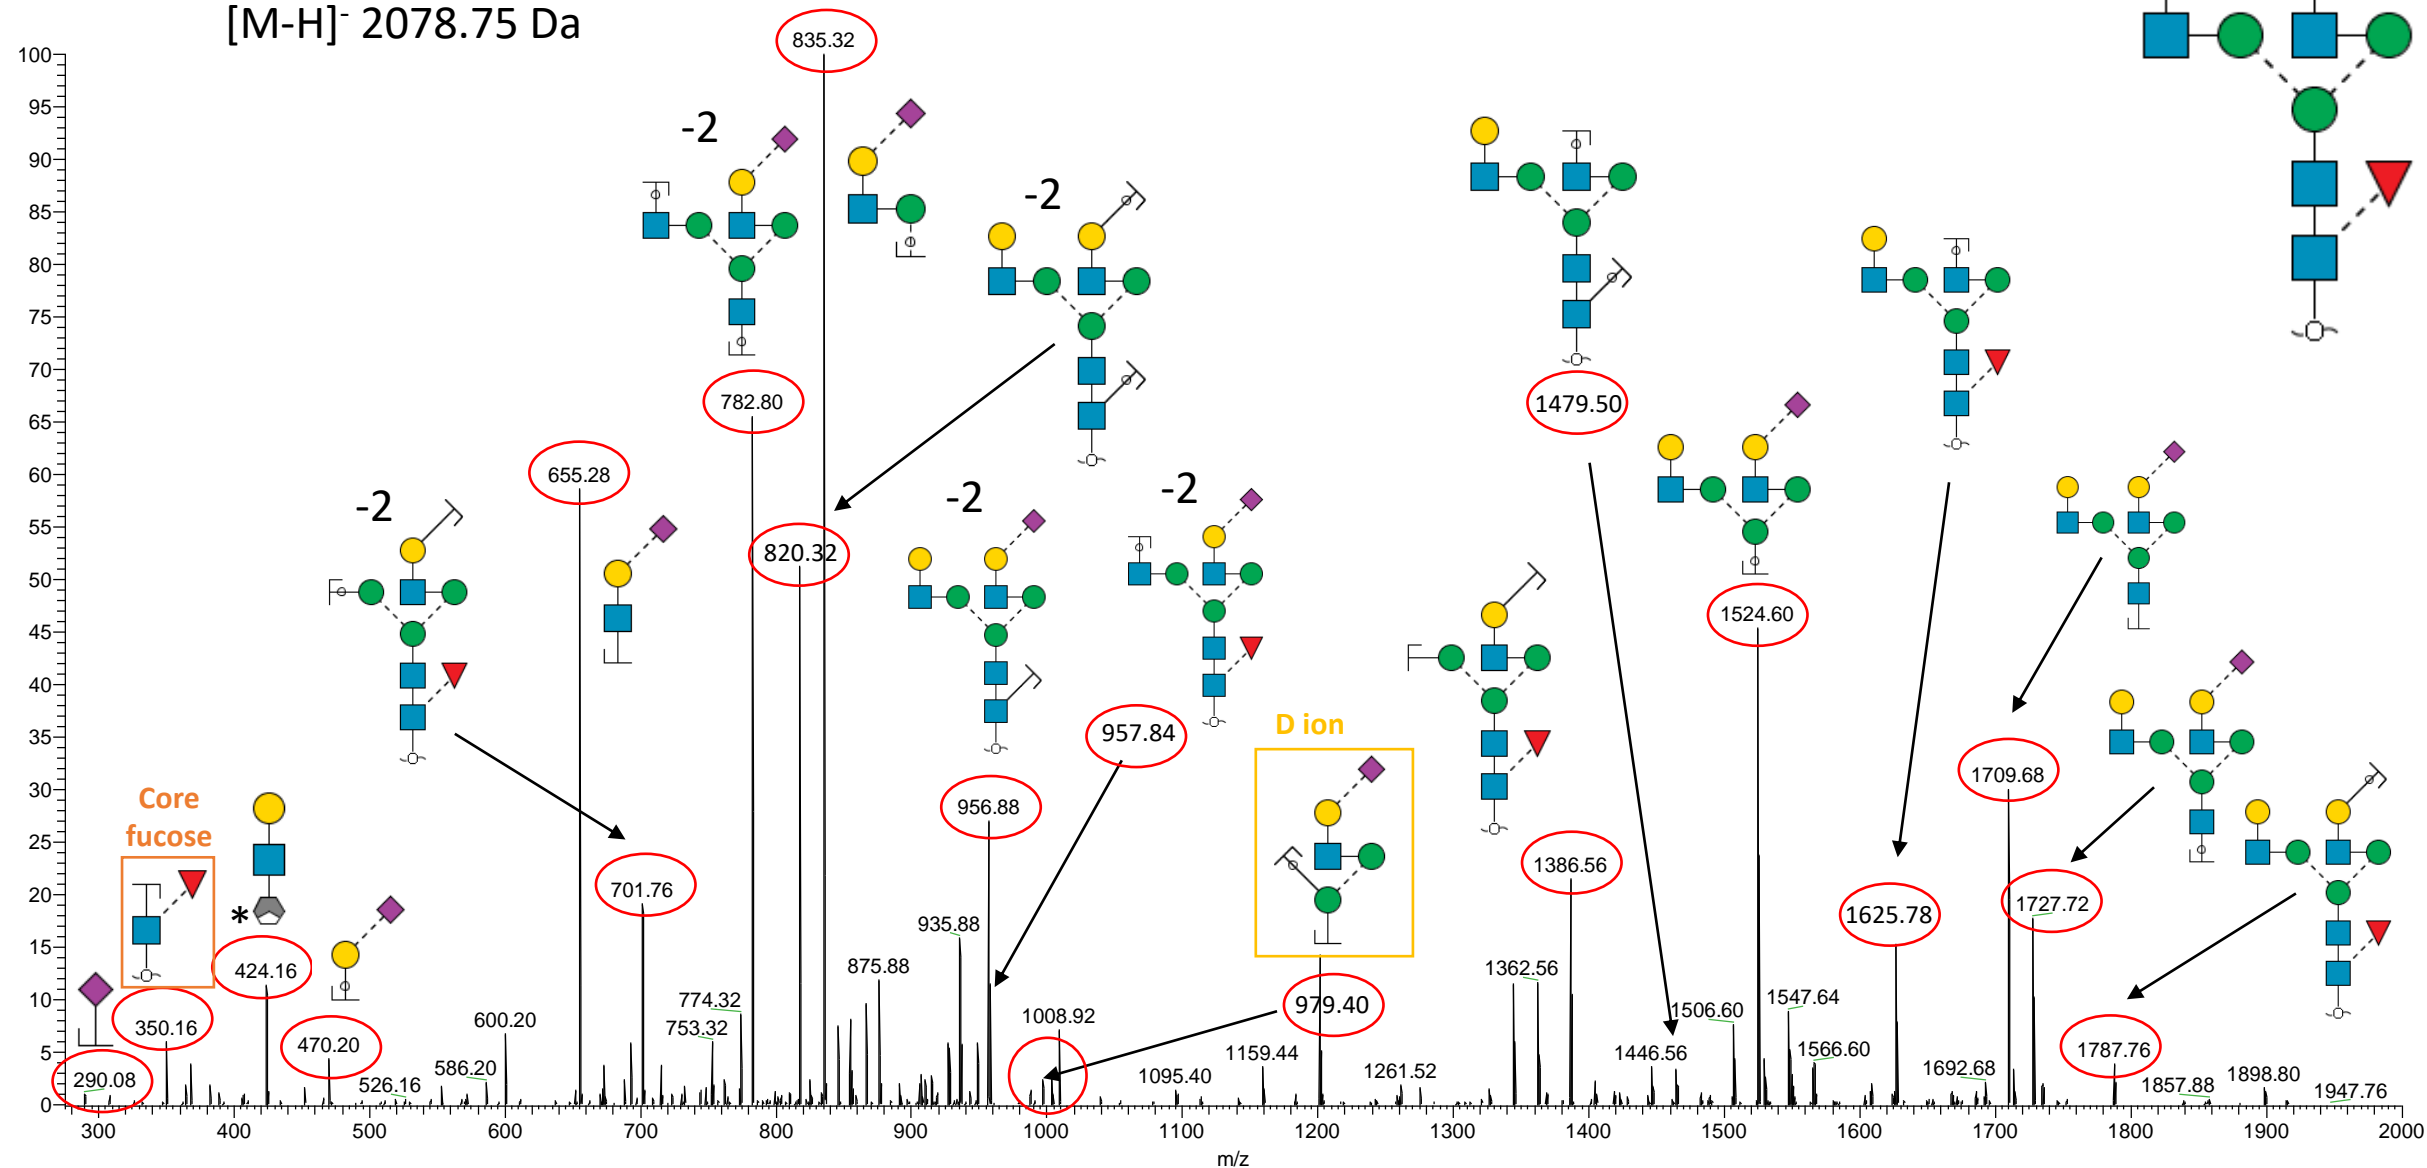

\* Ambiguity of the cross-ring fragments

Glycan #22b

Observed  $m/z$  1038.90 (2-), RT: ~39.3 min  
[M-H]<sup>-</sup> 2078.75 Da

Note: Based on PGC-LC elution pattern, this glycan is annotated as the  $\alpha$ 2,3-sialyl linkage isomer.

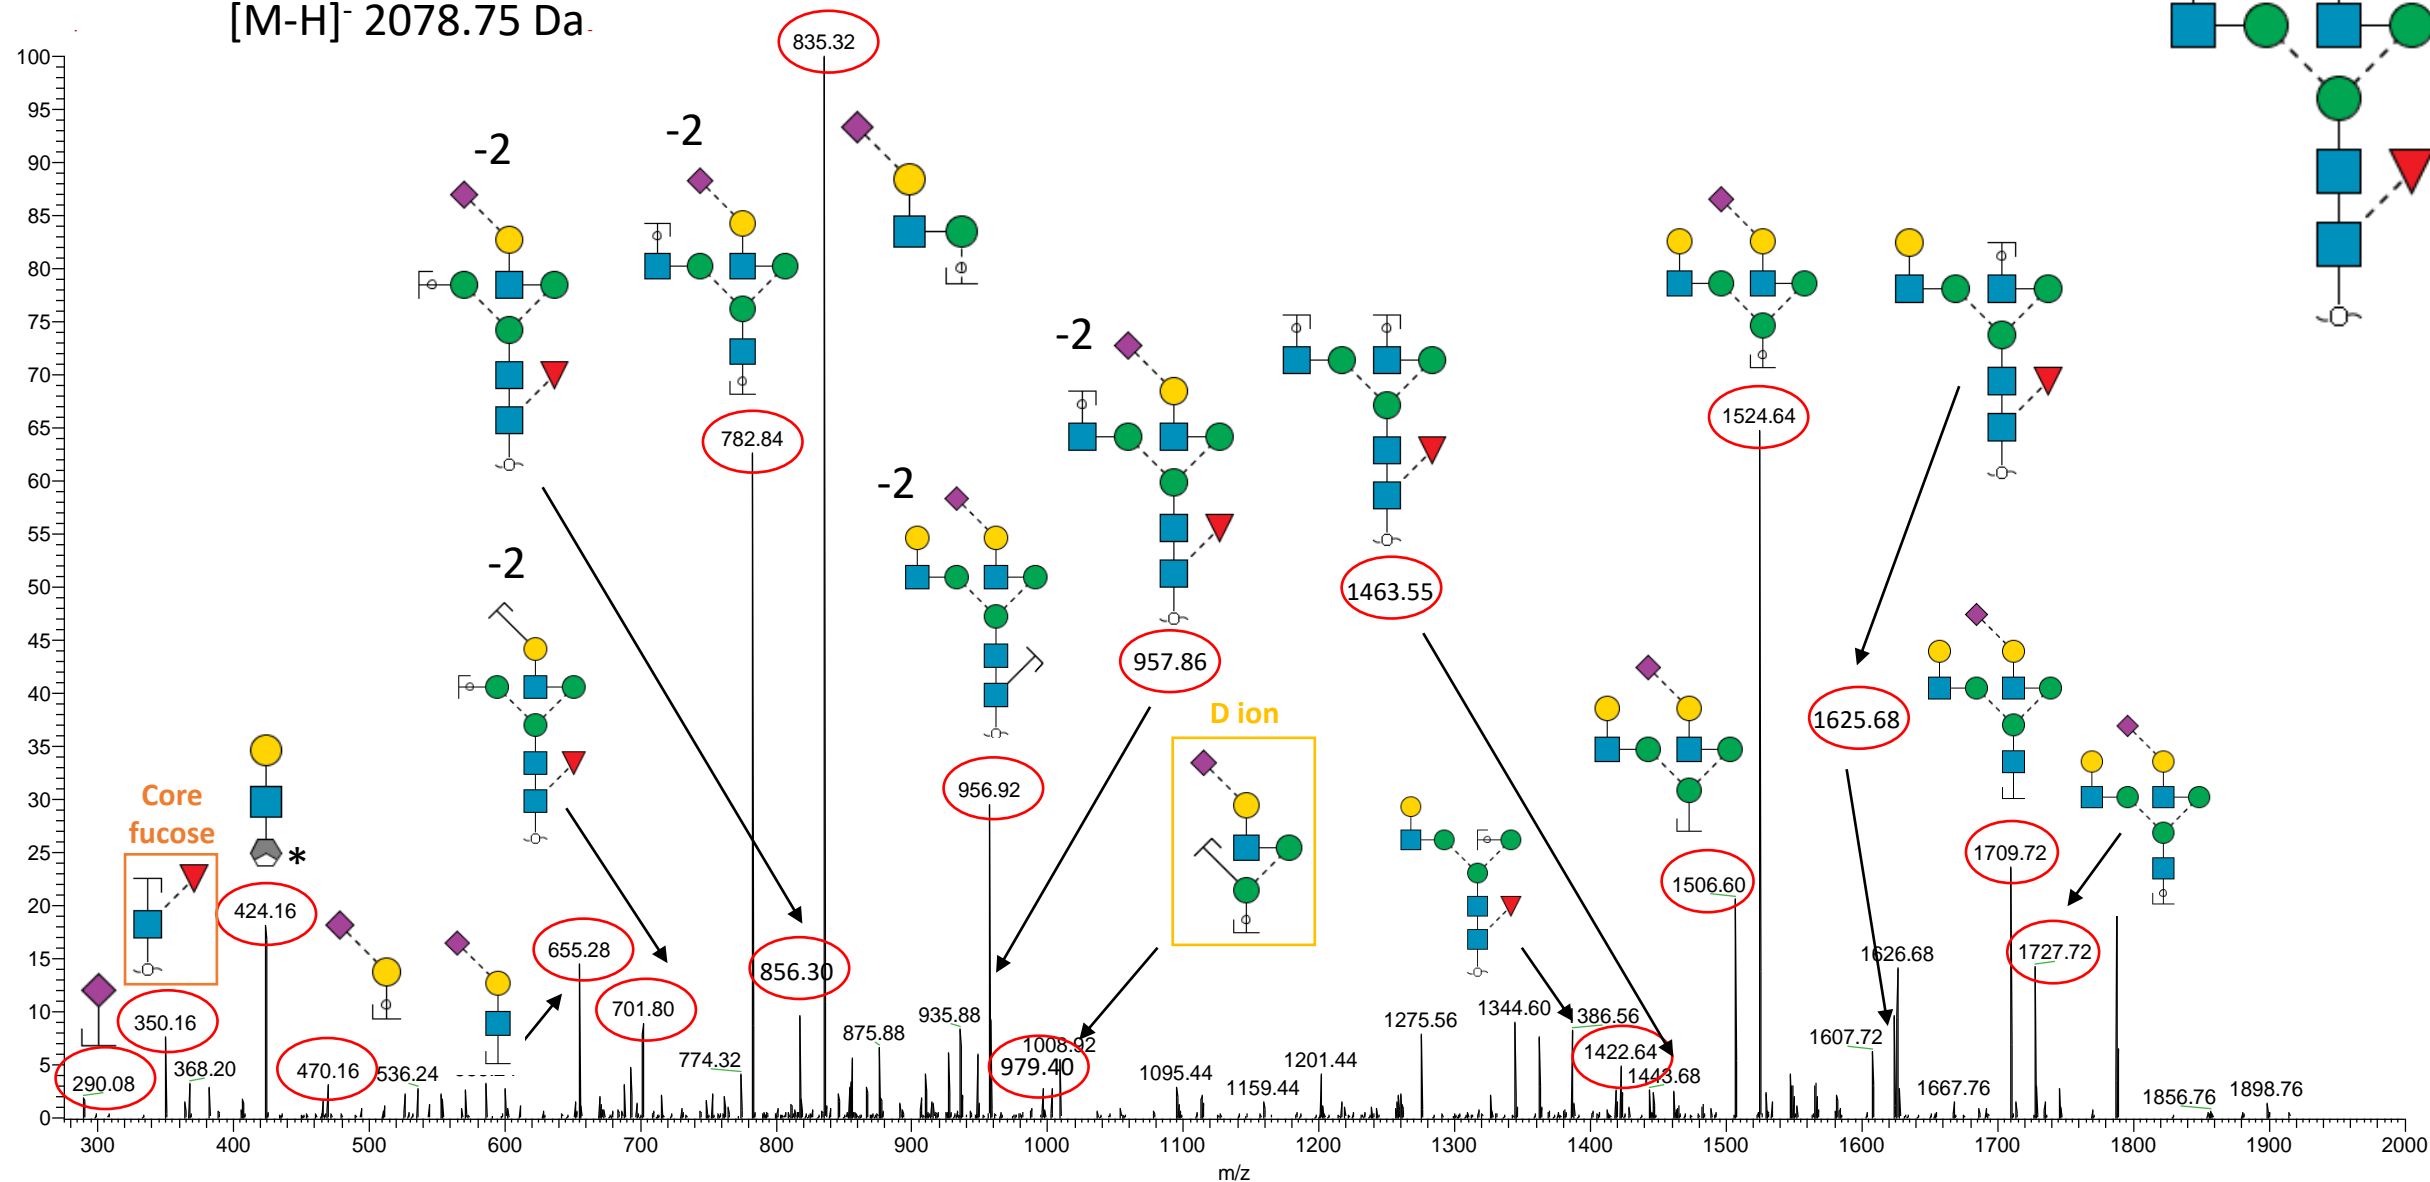

\* Ambiguity of the cross-ring fragments

Glycan #23a

Observed  $m/z$  1111.44 (2-), RT: ~28.8 min  
[M-H]<sup>-</sup> 2223.79 Da

Note: Based on PGC-LC elution pattern, this glycan is annotated as the  $\alpha$ 2,6- $\alpha$ 2,6-sialyl linkage isomer.

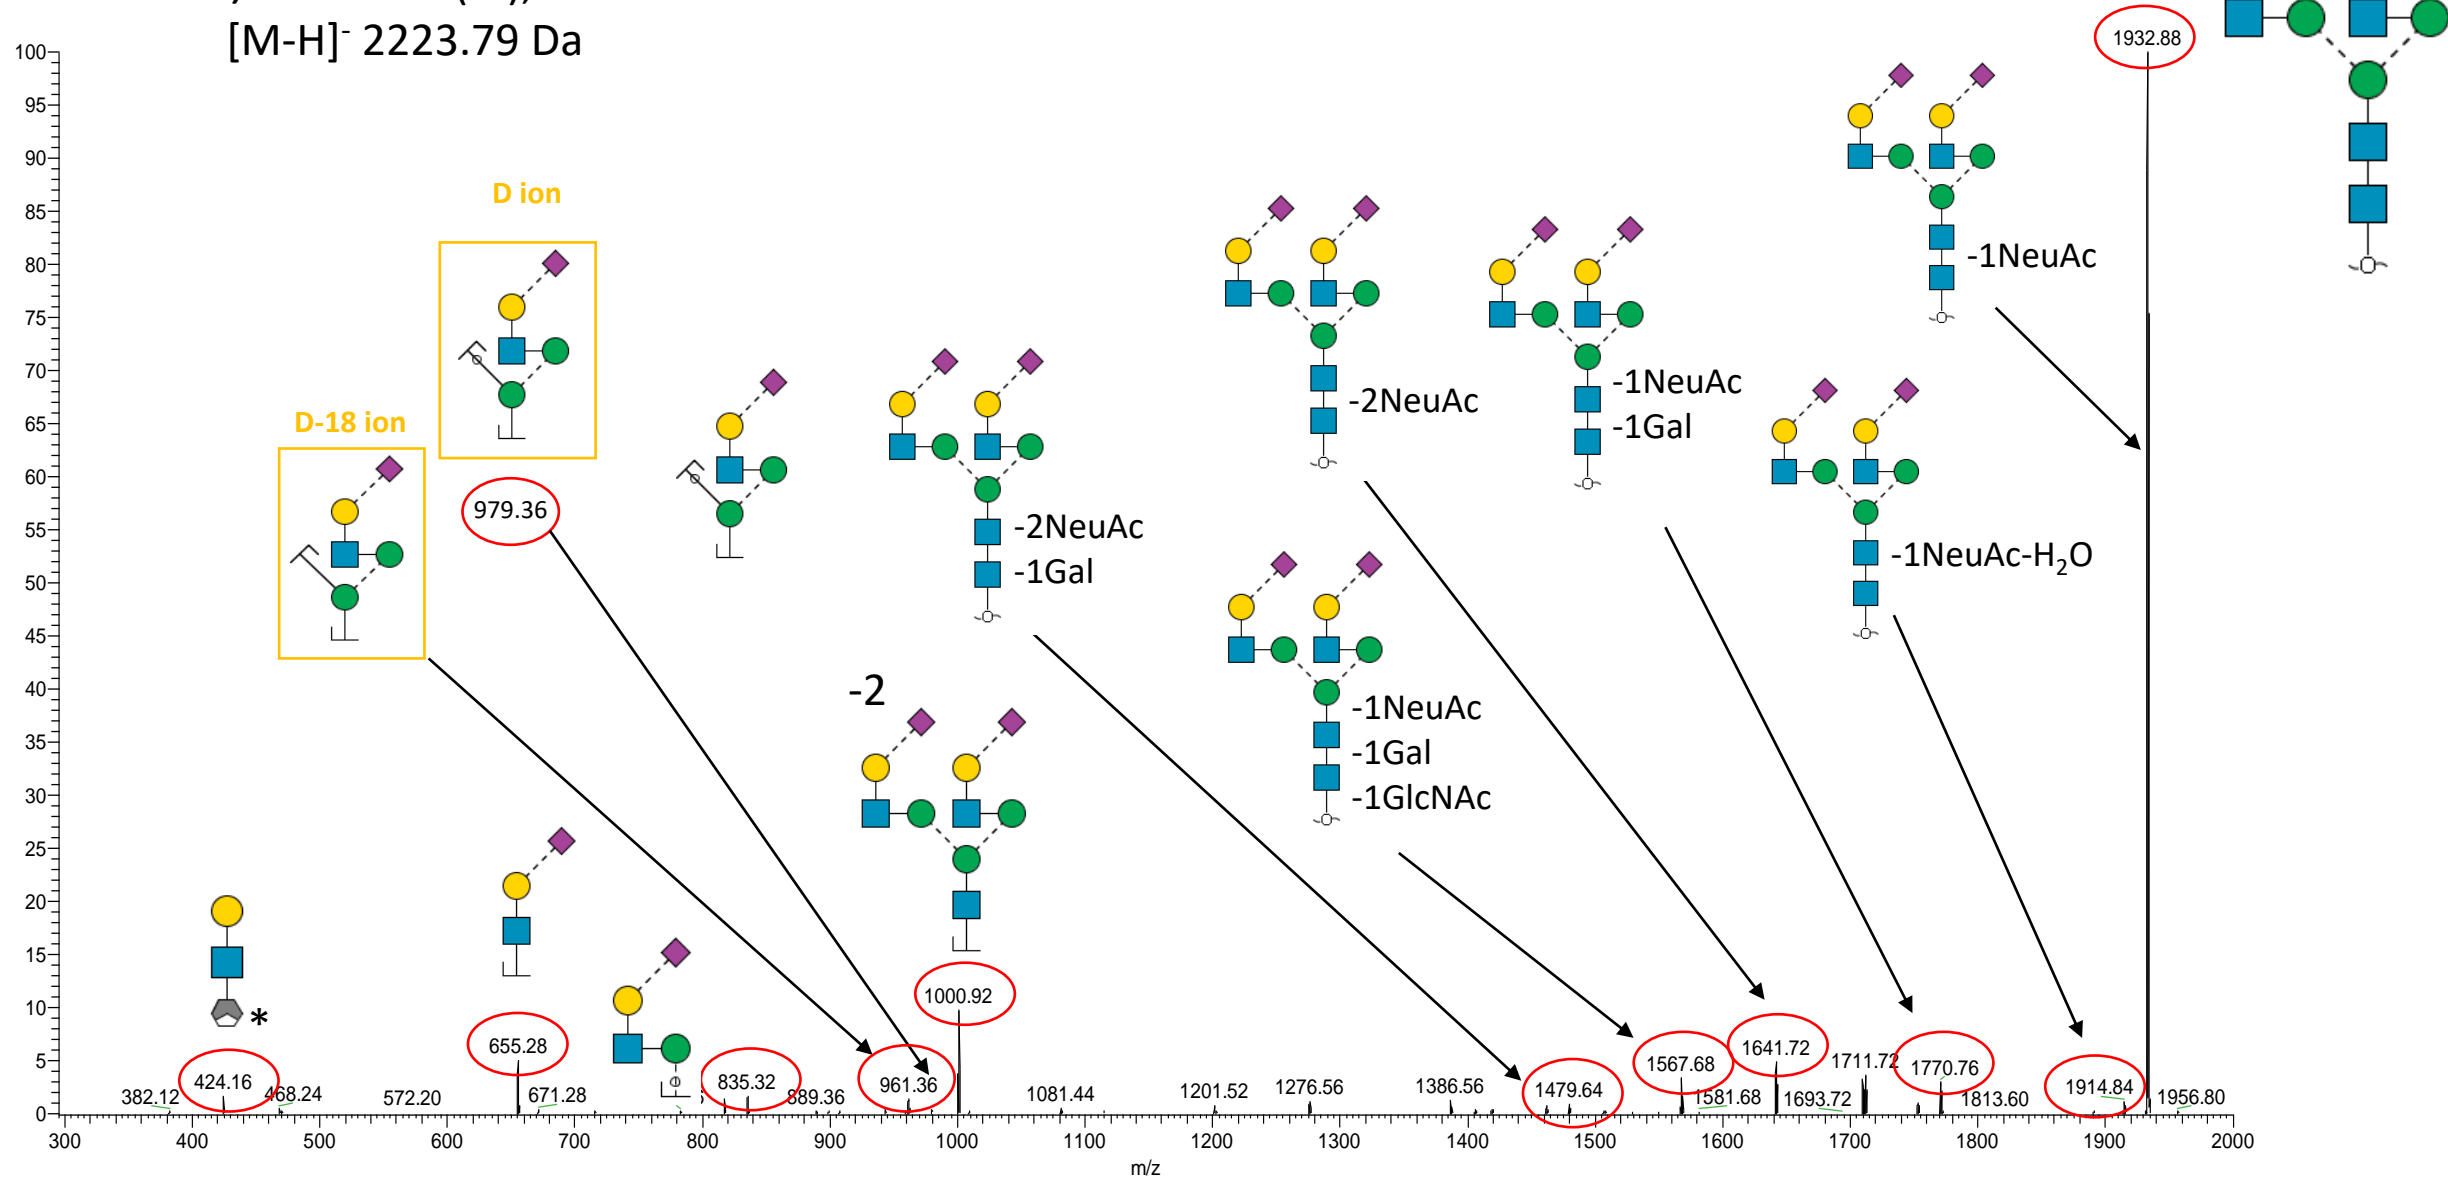

\* Ambiguity of the cross-ring fragments

Glycan #23b

Observed  $m/z$  1111.44 (2-), RT: ~38.8 min  
[M-H]<sup>-</sup> 2223.79 Da

Note: Based on PGC-LC elution pattern, this glycan is annotated as the  $\alpha$ 2,6- $\alpha$ 2,3-sialyl linkage isomer. The antenna positions of the linkage-specific sialic acid residues cannot be determined.

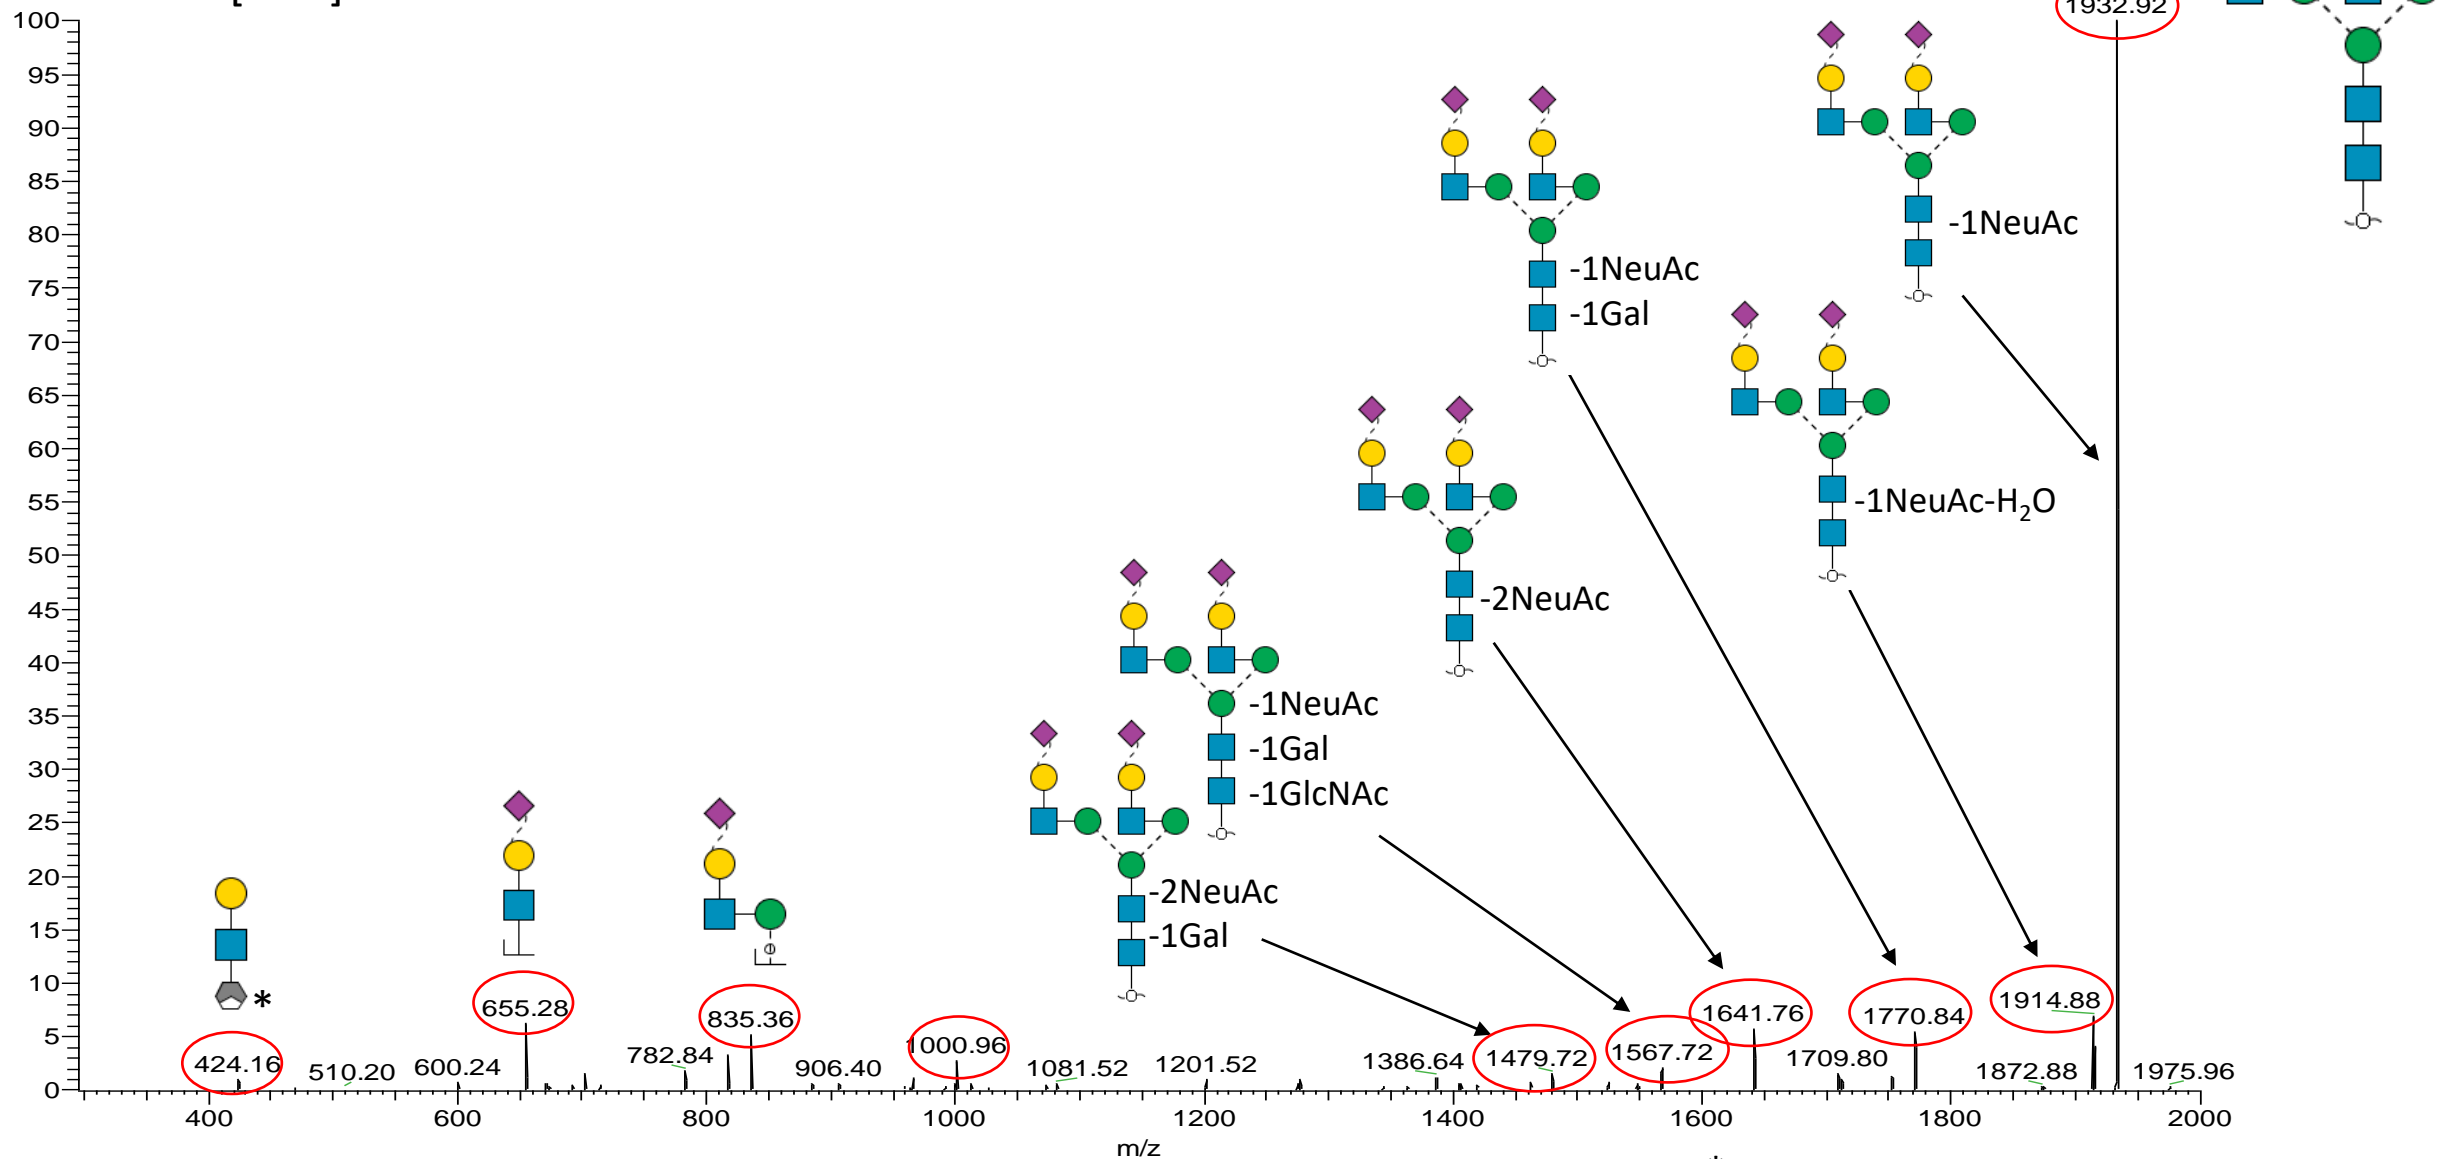

\*Ambiguity of the cross-ring fragments

Glycan #24a

Observed  $m/z$  1184.46 (2-), RT: ~36.4 min

$[M-H]^-$  2369.84 Da

Note: Based on the PGC-LC elution pattern, this glycan is annotated as the  $\alpha 2,6$ - $\alpha 2,6$ -sialyl linkage isomer.

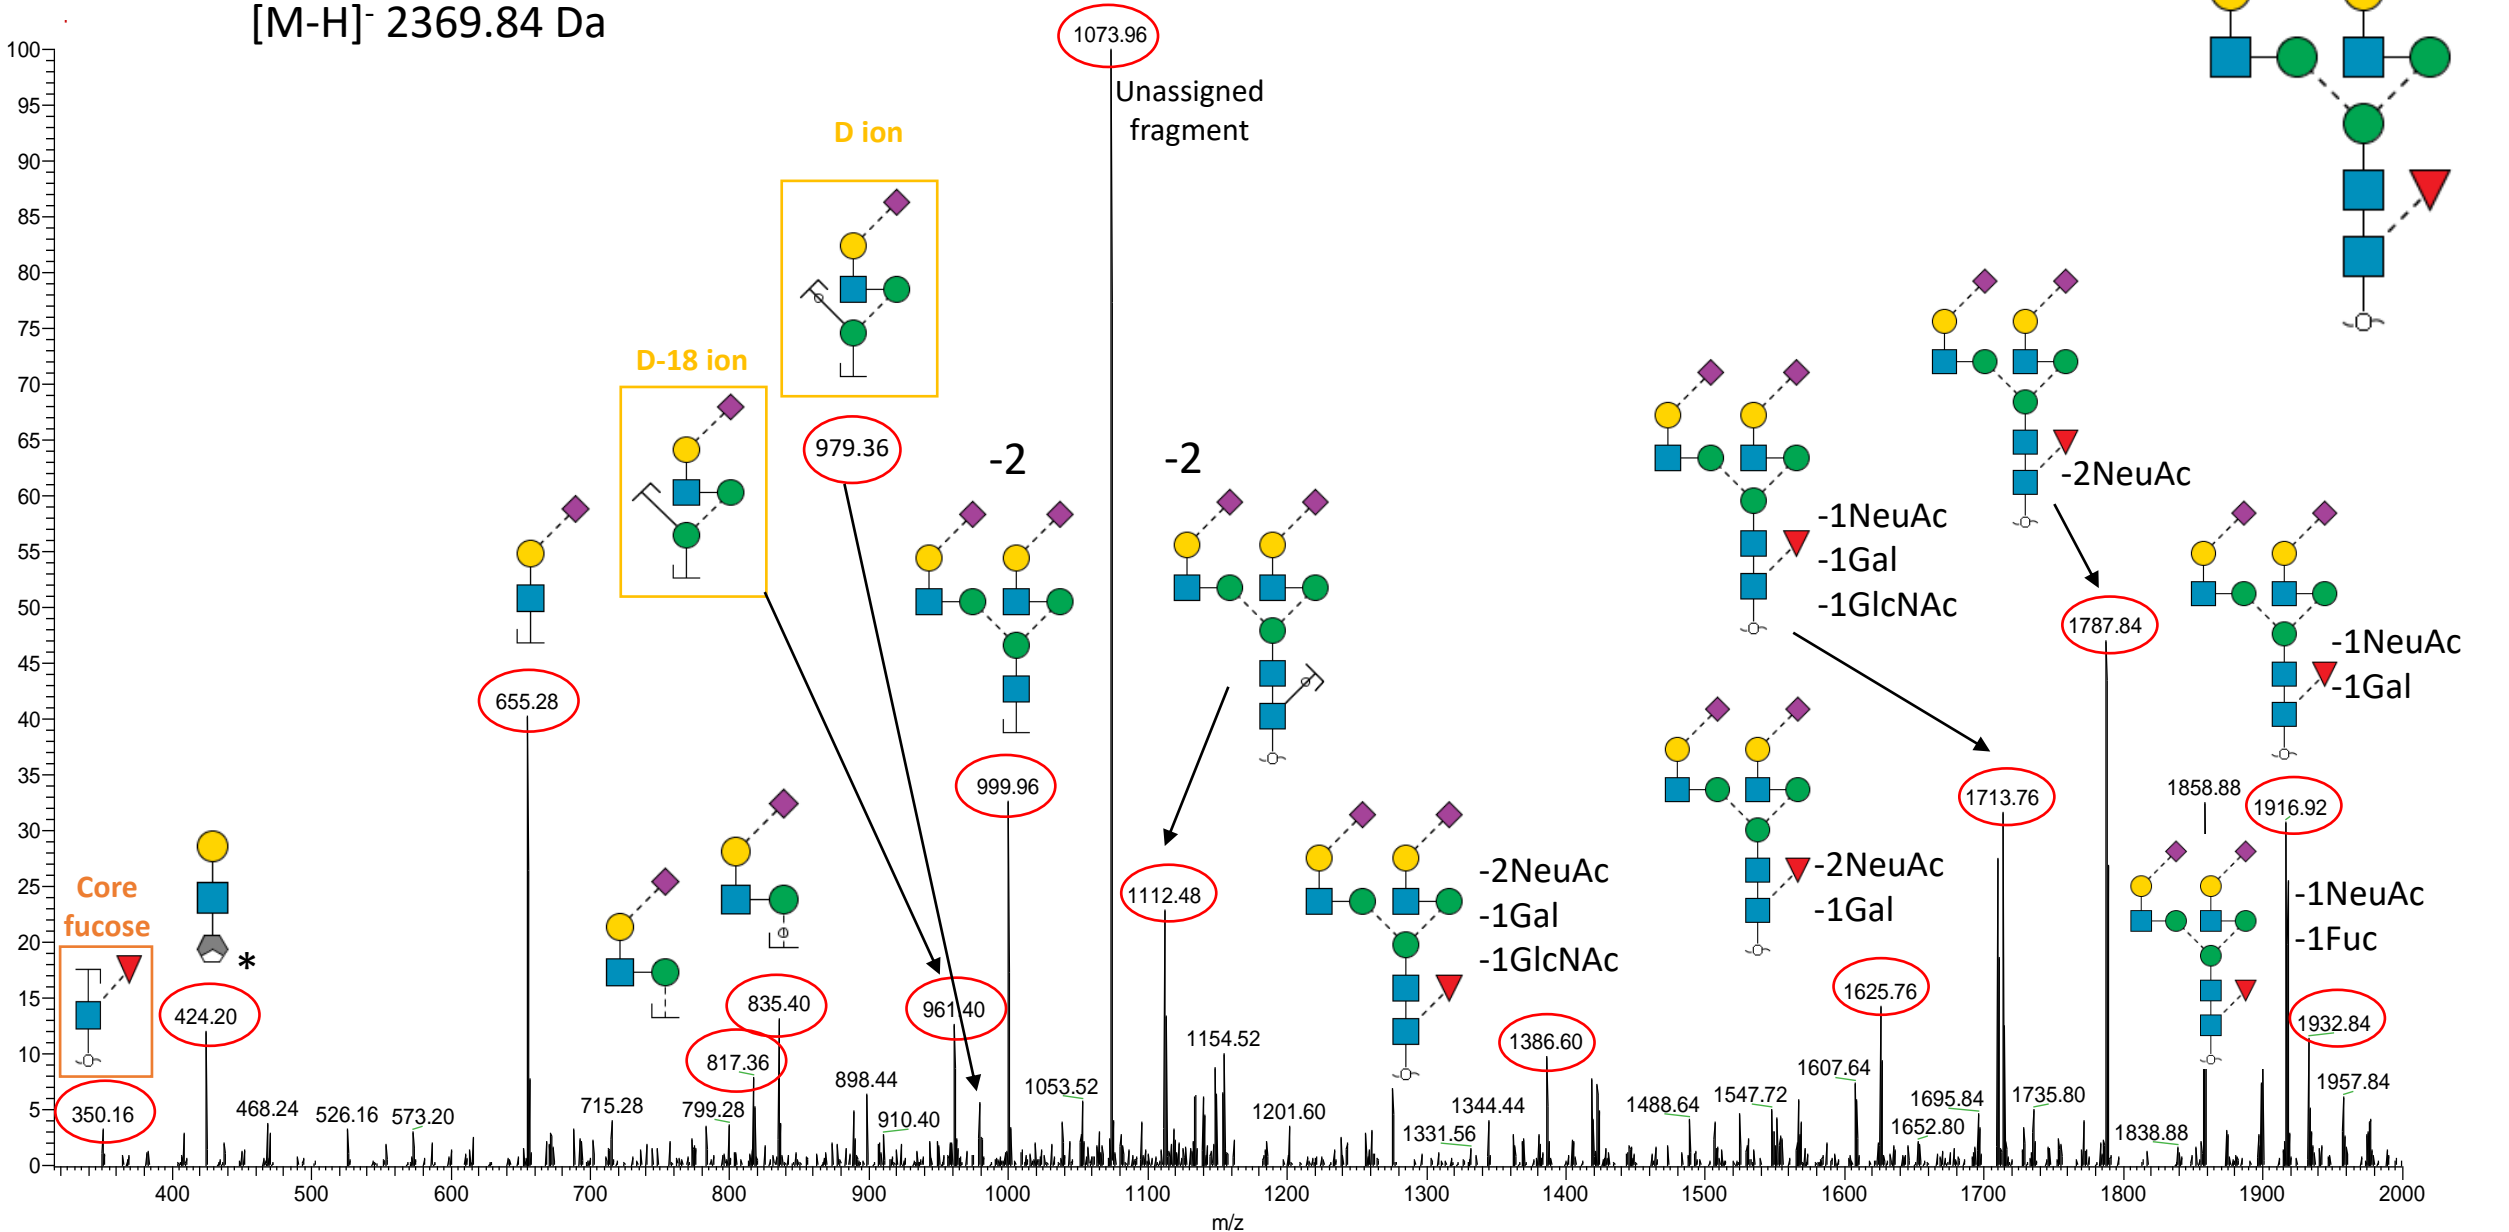

\* Ambiguity of the cross-ring fragments

# Glycan #24b

Observed  $m/z$  1184.46 (2-), RT: ~43.9 min  
[M-H]<sup>-</sup> 2369.84 Da

Note: Based on the PGC-LC elution pattern, this glycan is annotated as the  $\alpha$ 2,6- $\alpha$ 2,3-sialyl linkage isomer. The antenna positions of the linkage-specific sialic acid residues cannot be determined.

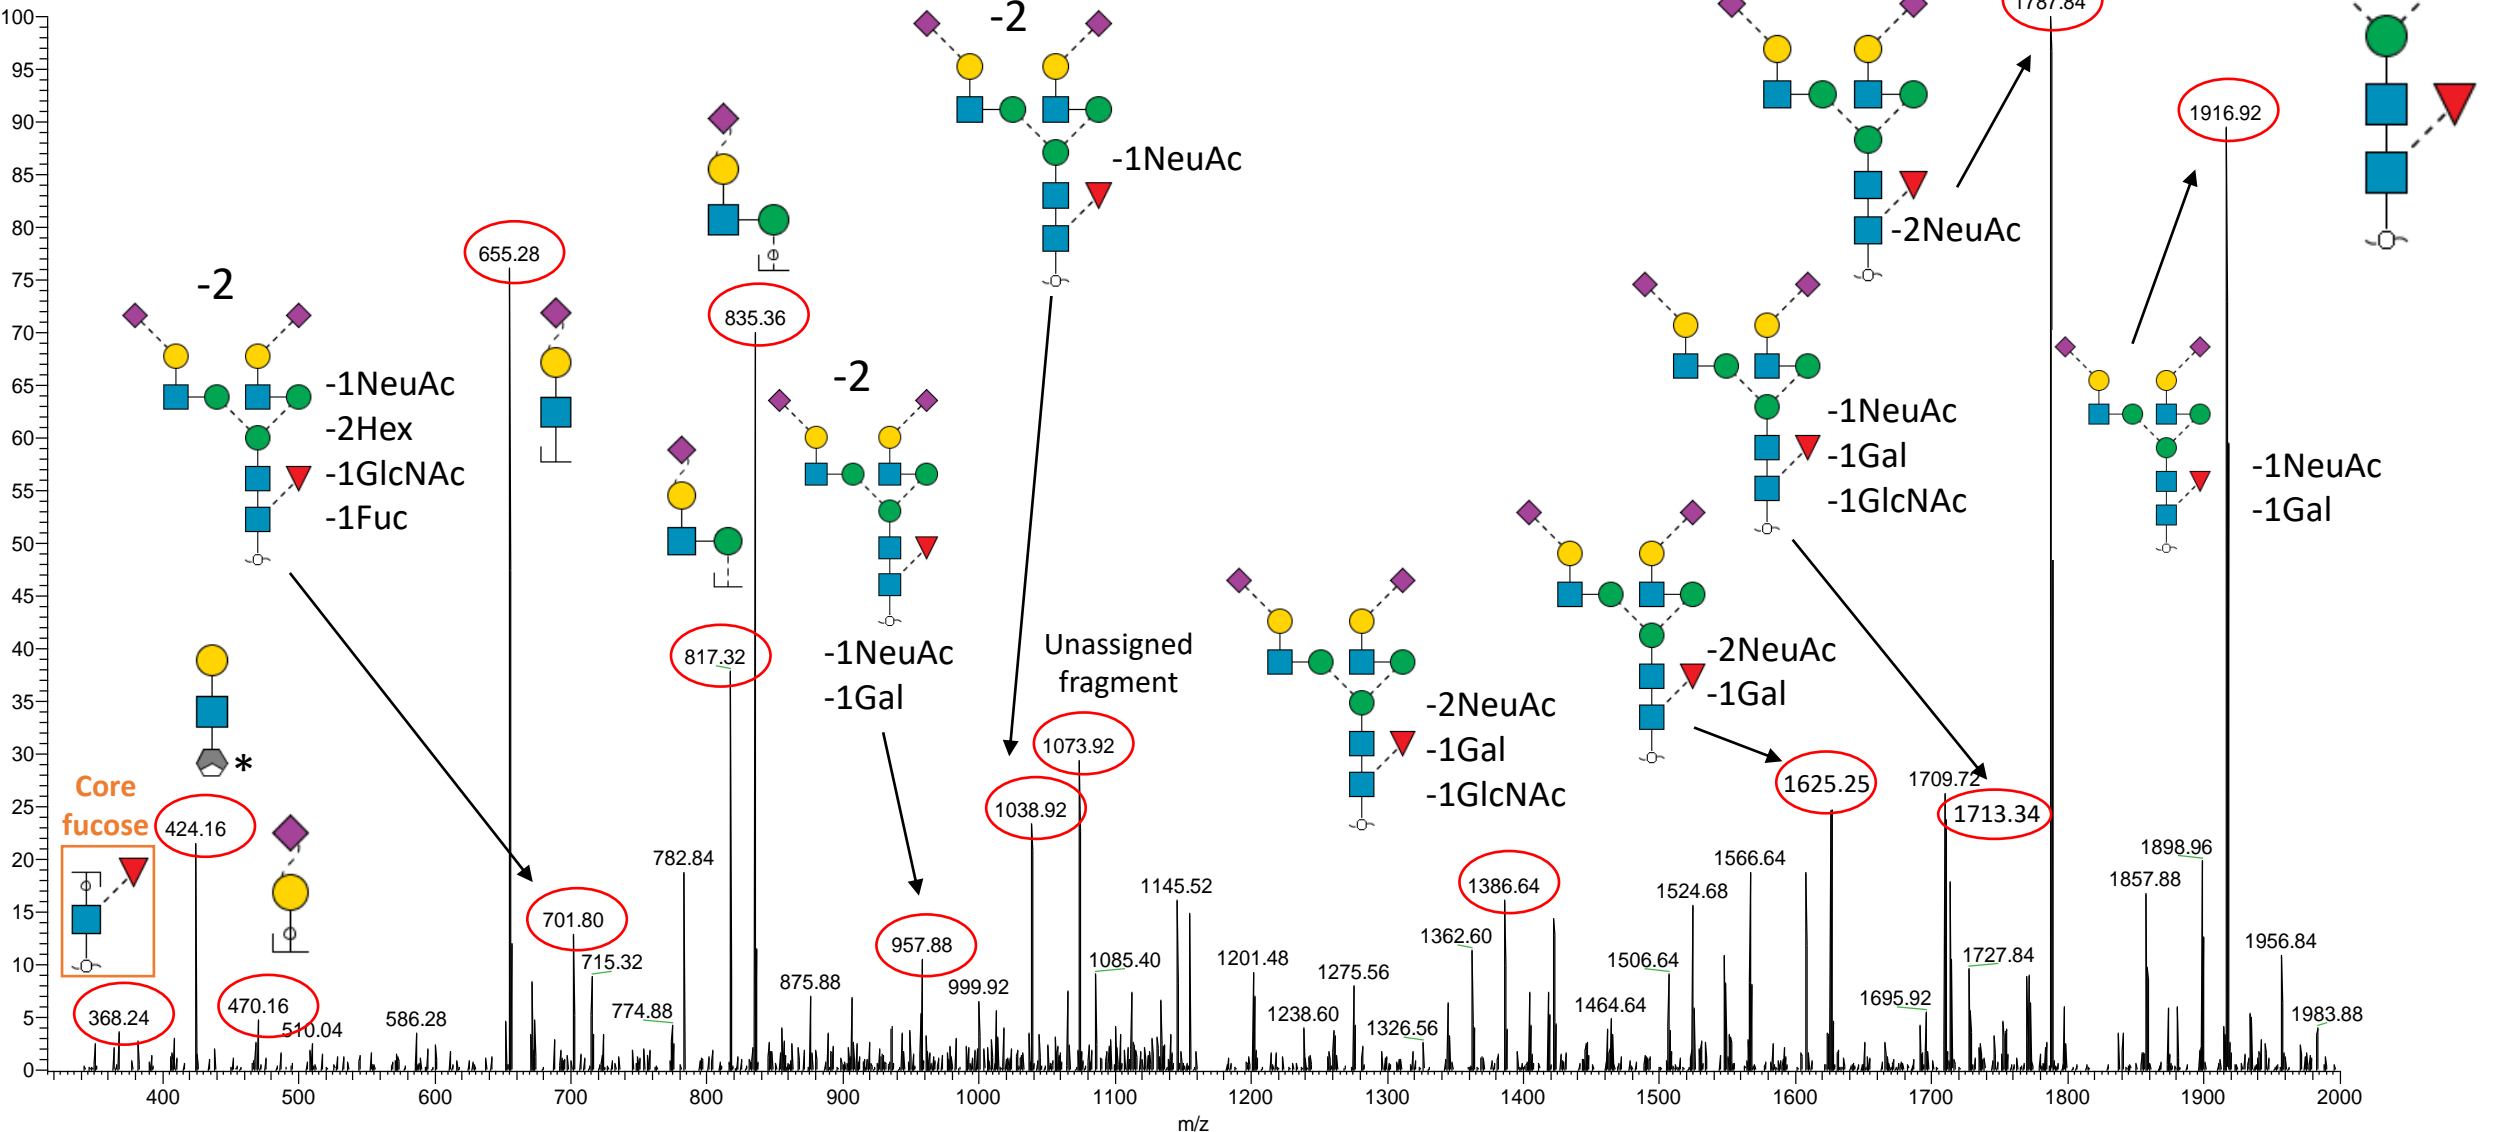

\* Ambiguity of the cross-ring fragments



Glycan #24c

Observed  $m/z$  1184.46 (2-), RT: ~44.4 min  
[M-H]<sup>-</sup> 2369.84 Da

Note: Based on the PGC-LC elution pattern, this glycan is annotated as the  $\alpha$ 2,3- $\alpha$ 2,6-sialyl linkage isomer. The antenna positions of the linkage-specific sialic acid residues cannot be determined.

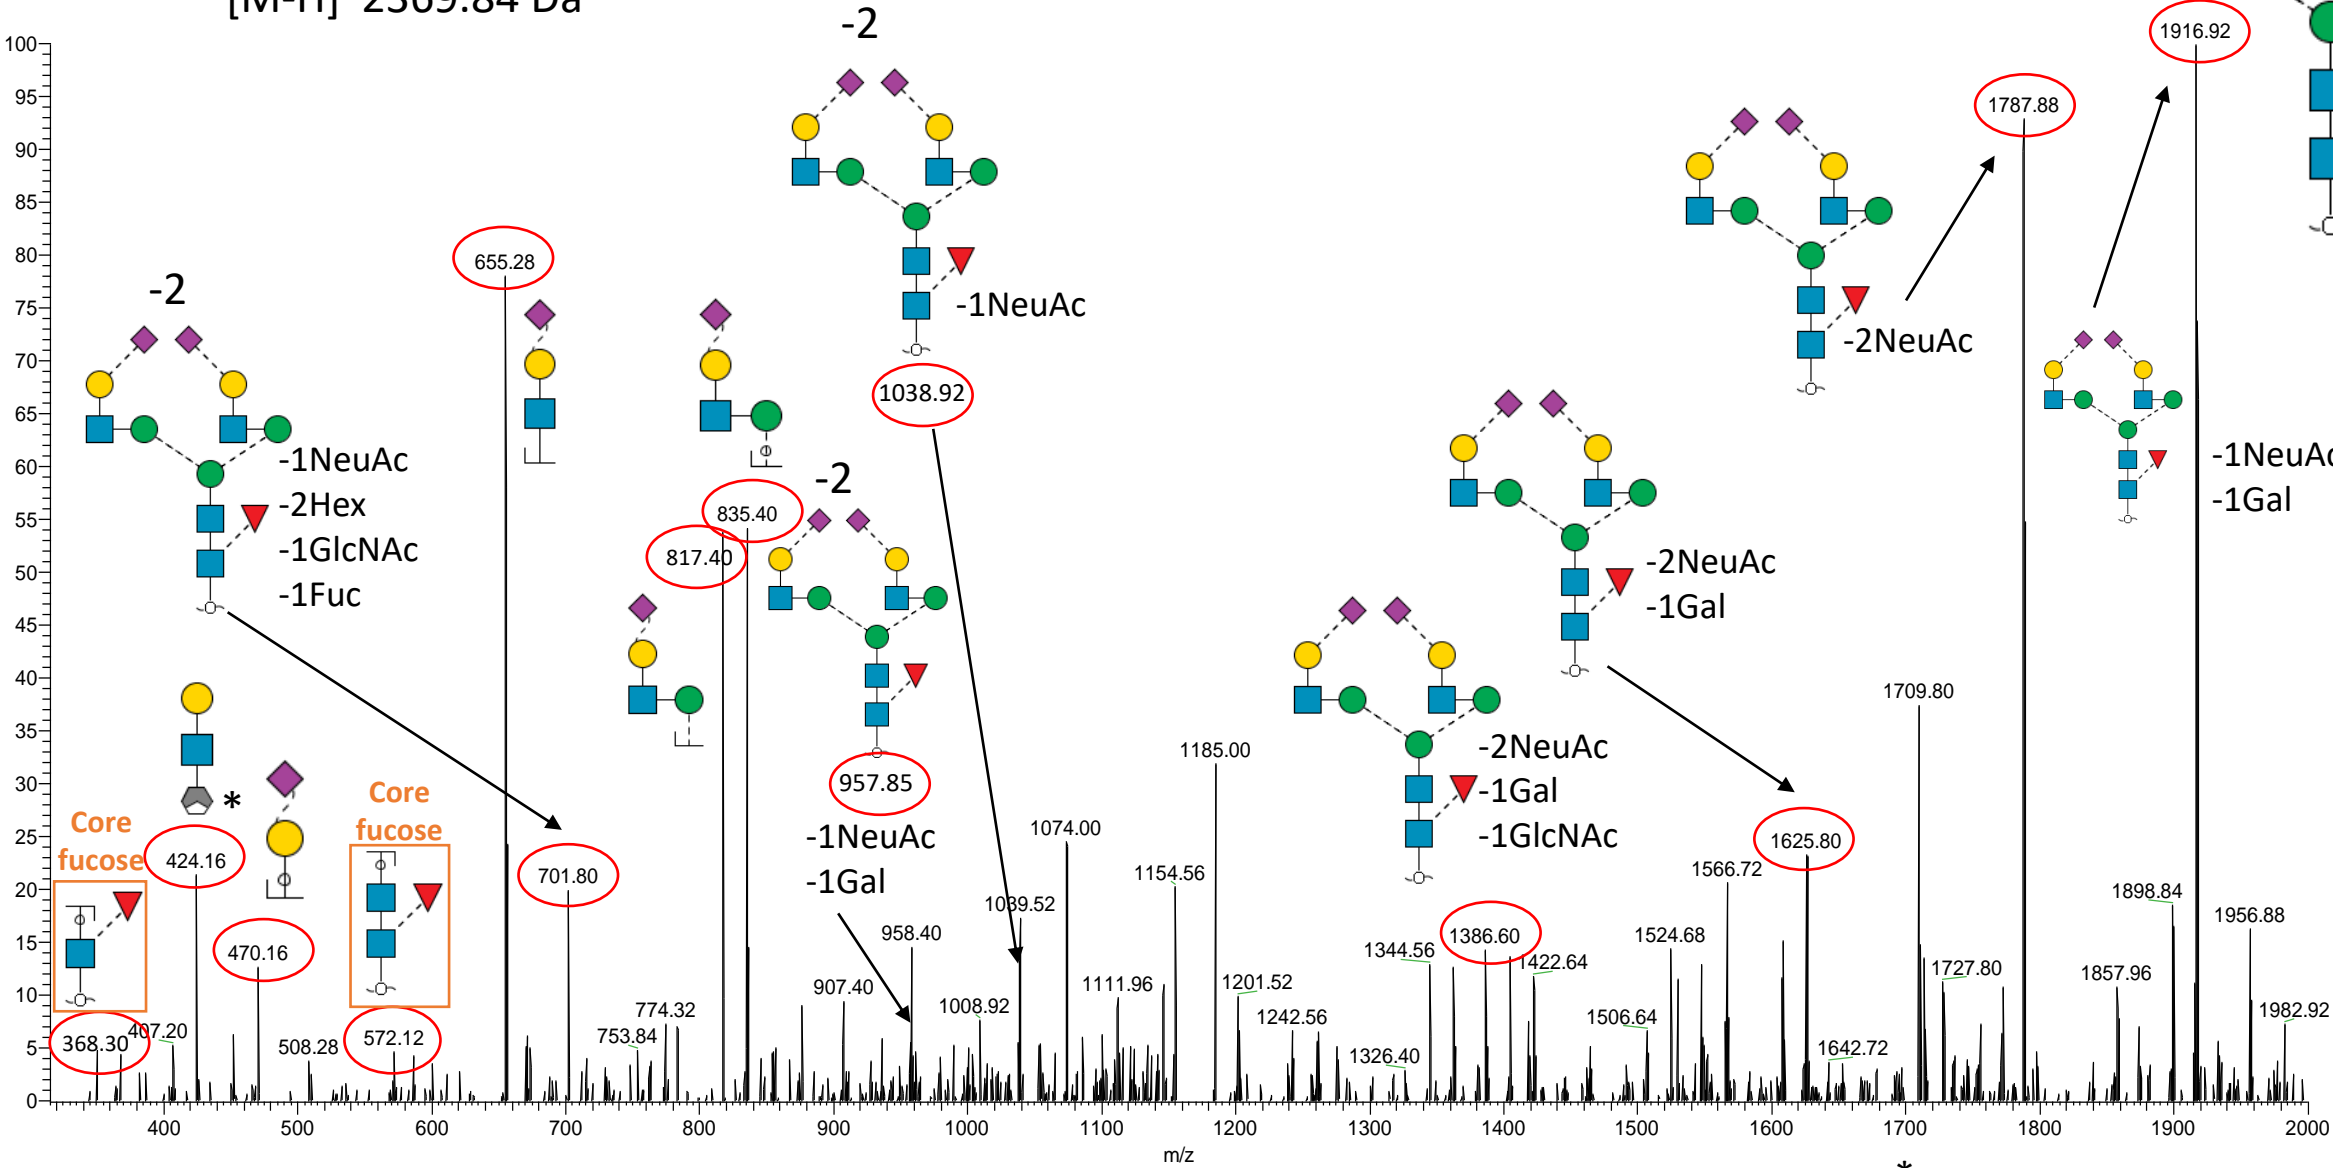

Glycan #24d

Observed  $m/z$  1184.46 (2-), RT: ~51.8 min  
[M-H]<sup>-</sup> 2369.84 Da

Note: Based on the PGC-LC elution pattern and the presence of four isomers, this glycan is annotated as the  $\alpha$ 2,3- $\alpha$ 2,3-sialyl linkage isomer.

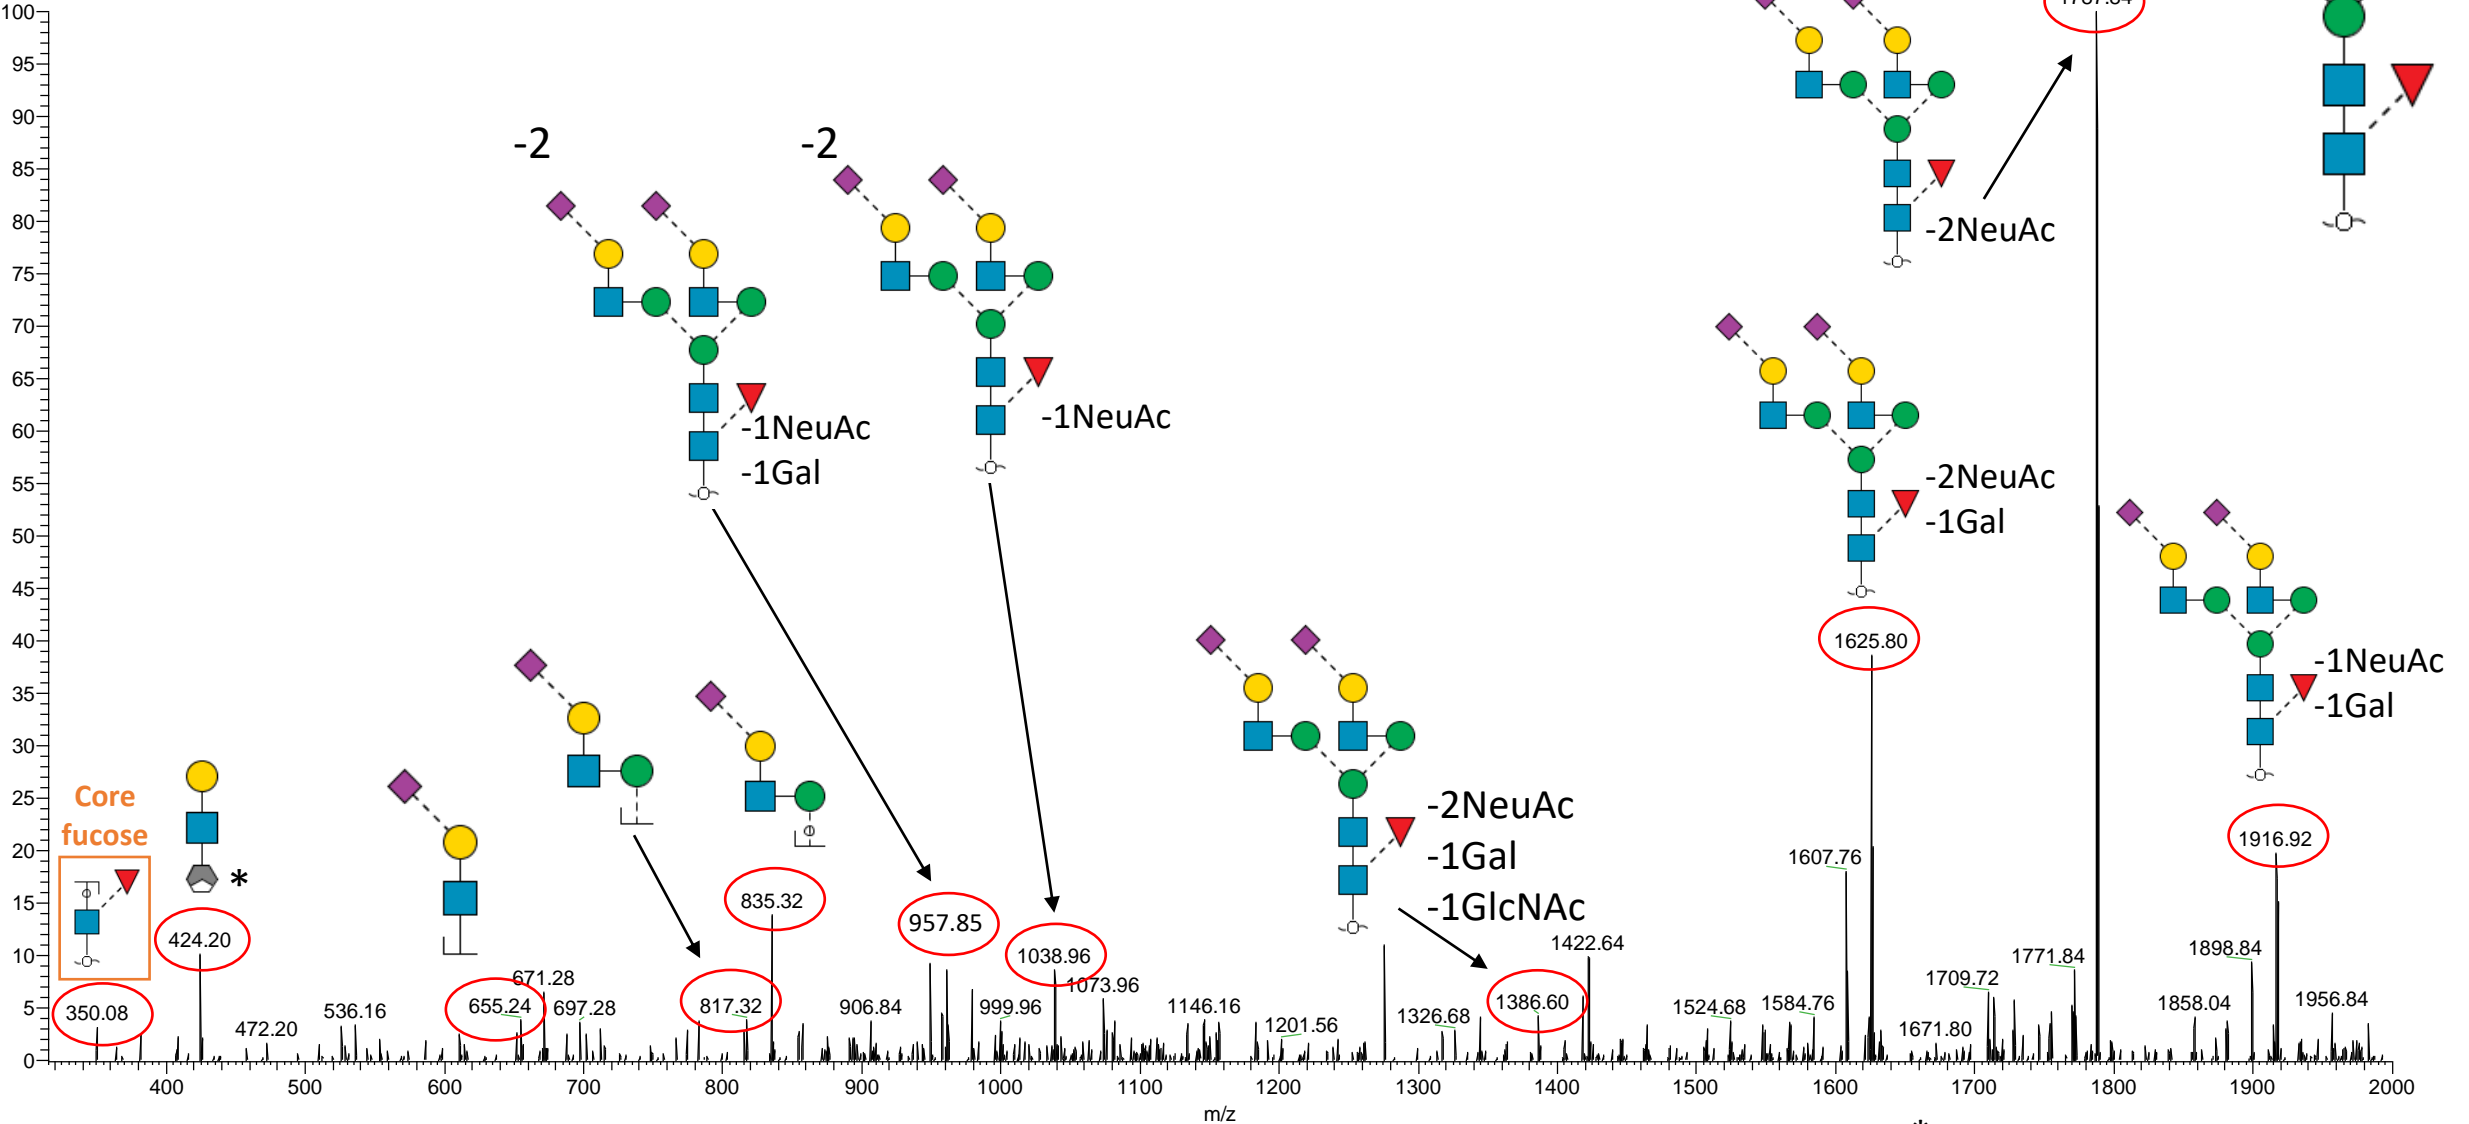

\* Ambiguity of the cross-ring fragments

Glycan #25

Observed  $m/z$  759.82 (2-), RT: ~16.8 min  
[M-H]<sup>-</sup> 1520.57 Da

Note: Based on the very early PGC-LC elution time and the abundant D-ion, this structure is assigned as a bisecting GlcNAc.

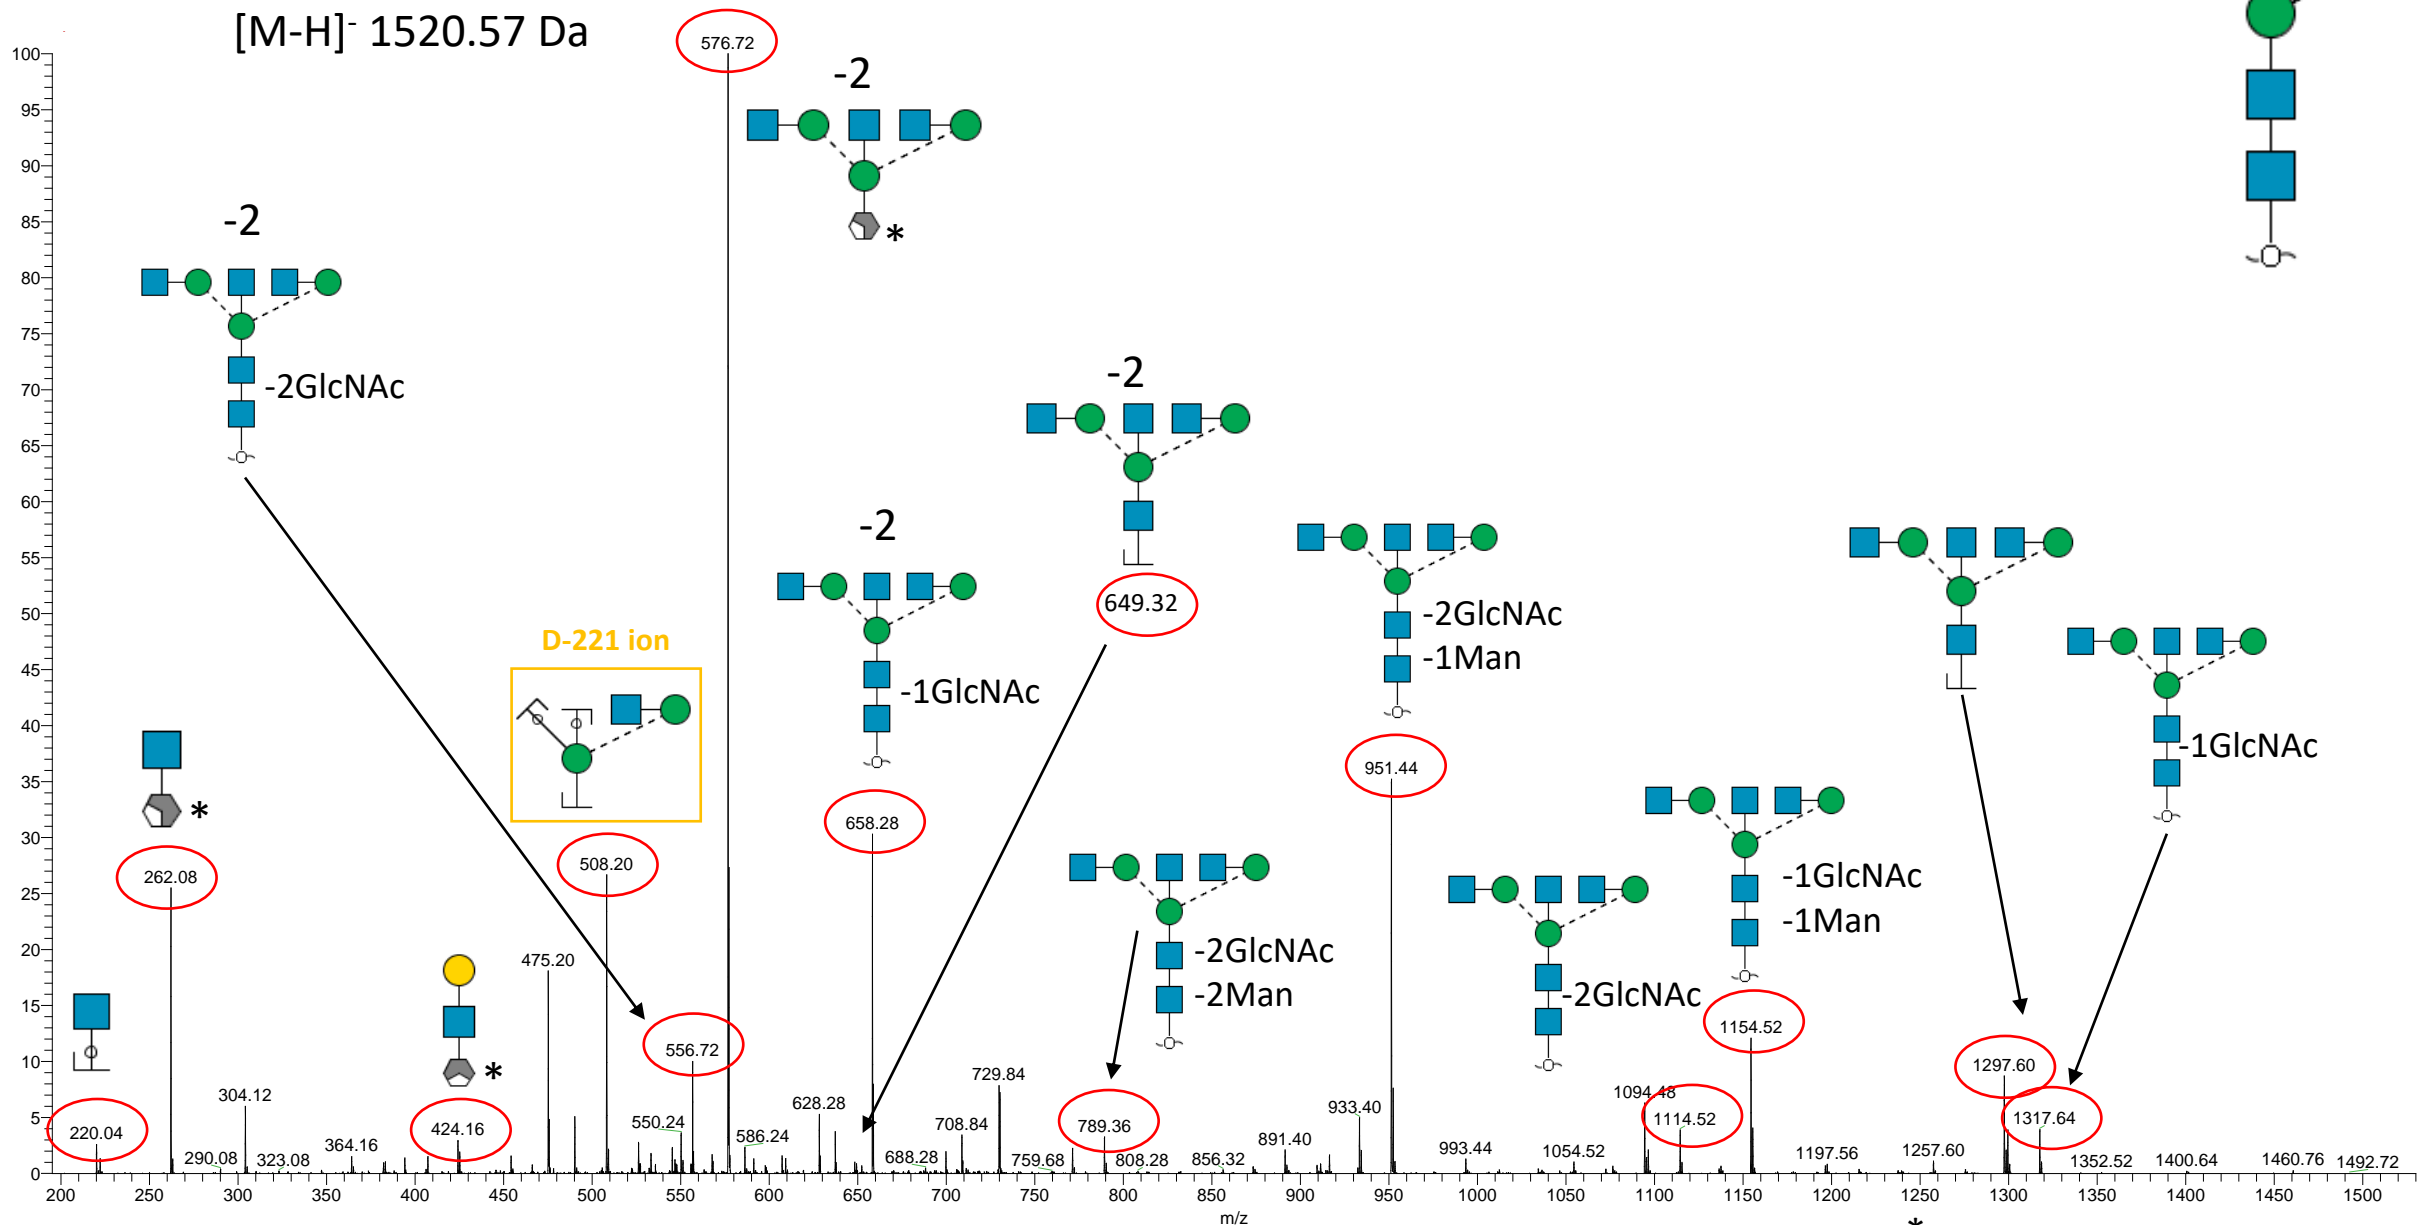

\* Ambiguity of the cross-ring fragments

## Glycan #26

Observed  $m/z$  832.81 (2-), RT: ~19.7 min

$[M-H]^-$  1666.63 Da

Note: Based on the very early PGC-LC elution time and the abundant D-ion, this structure is assigned as a bisecting GlcNAc.

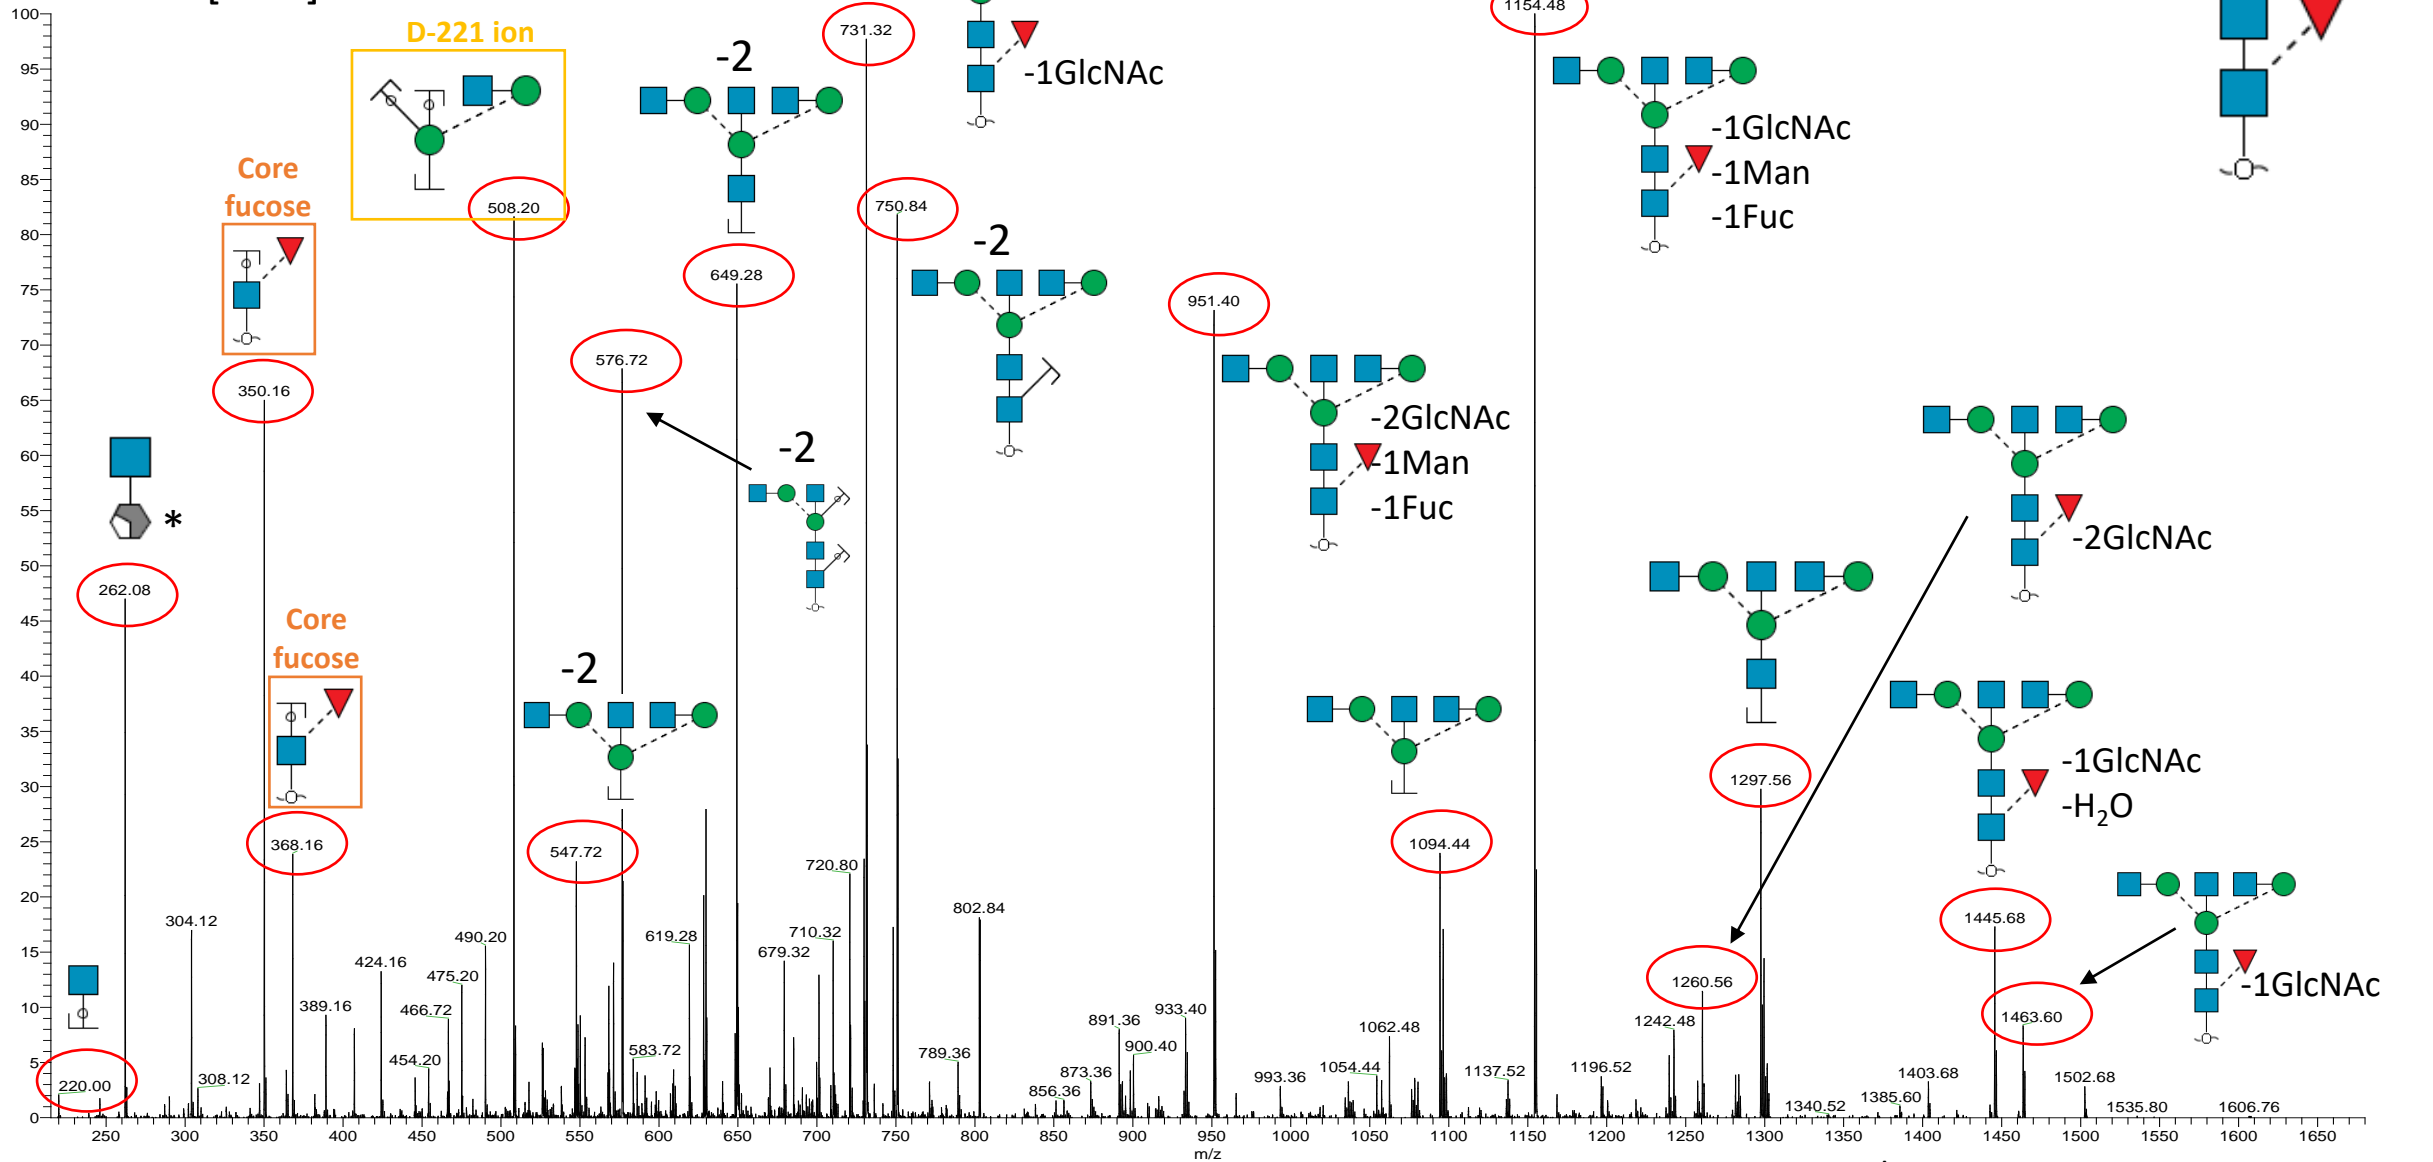

\* Ambiguity of the cross-ring fragments

Glycan #27

Observed  $m/z$  840.84 (2-), RT: ~17.8 min  
[M-H]<sup>-</sup> 1682.62 Da

Note: Based on the very early PGC-LC elution time and the abundant D-ion, this structure is assigned as a bisecting GlcNAc.

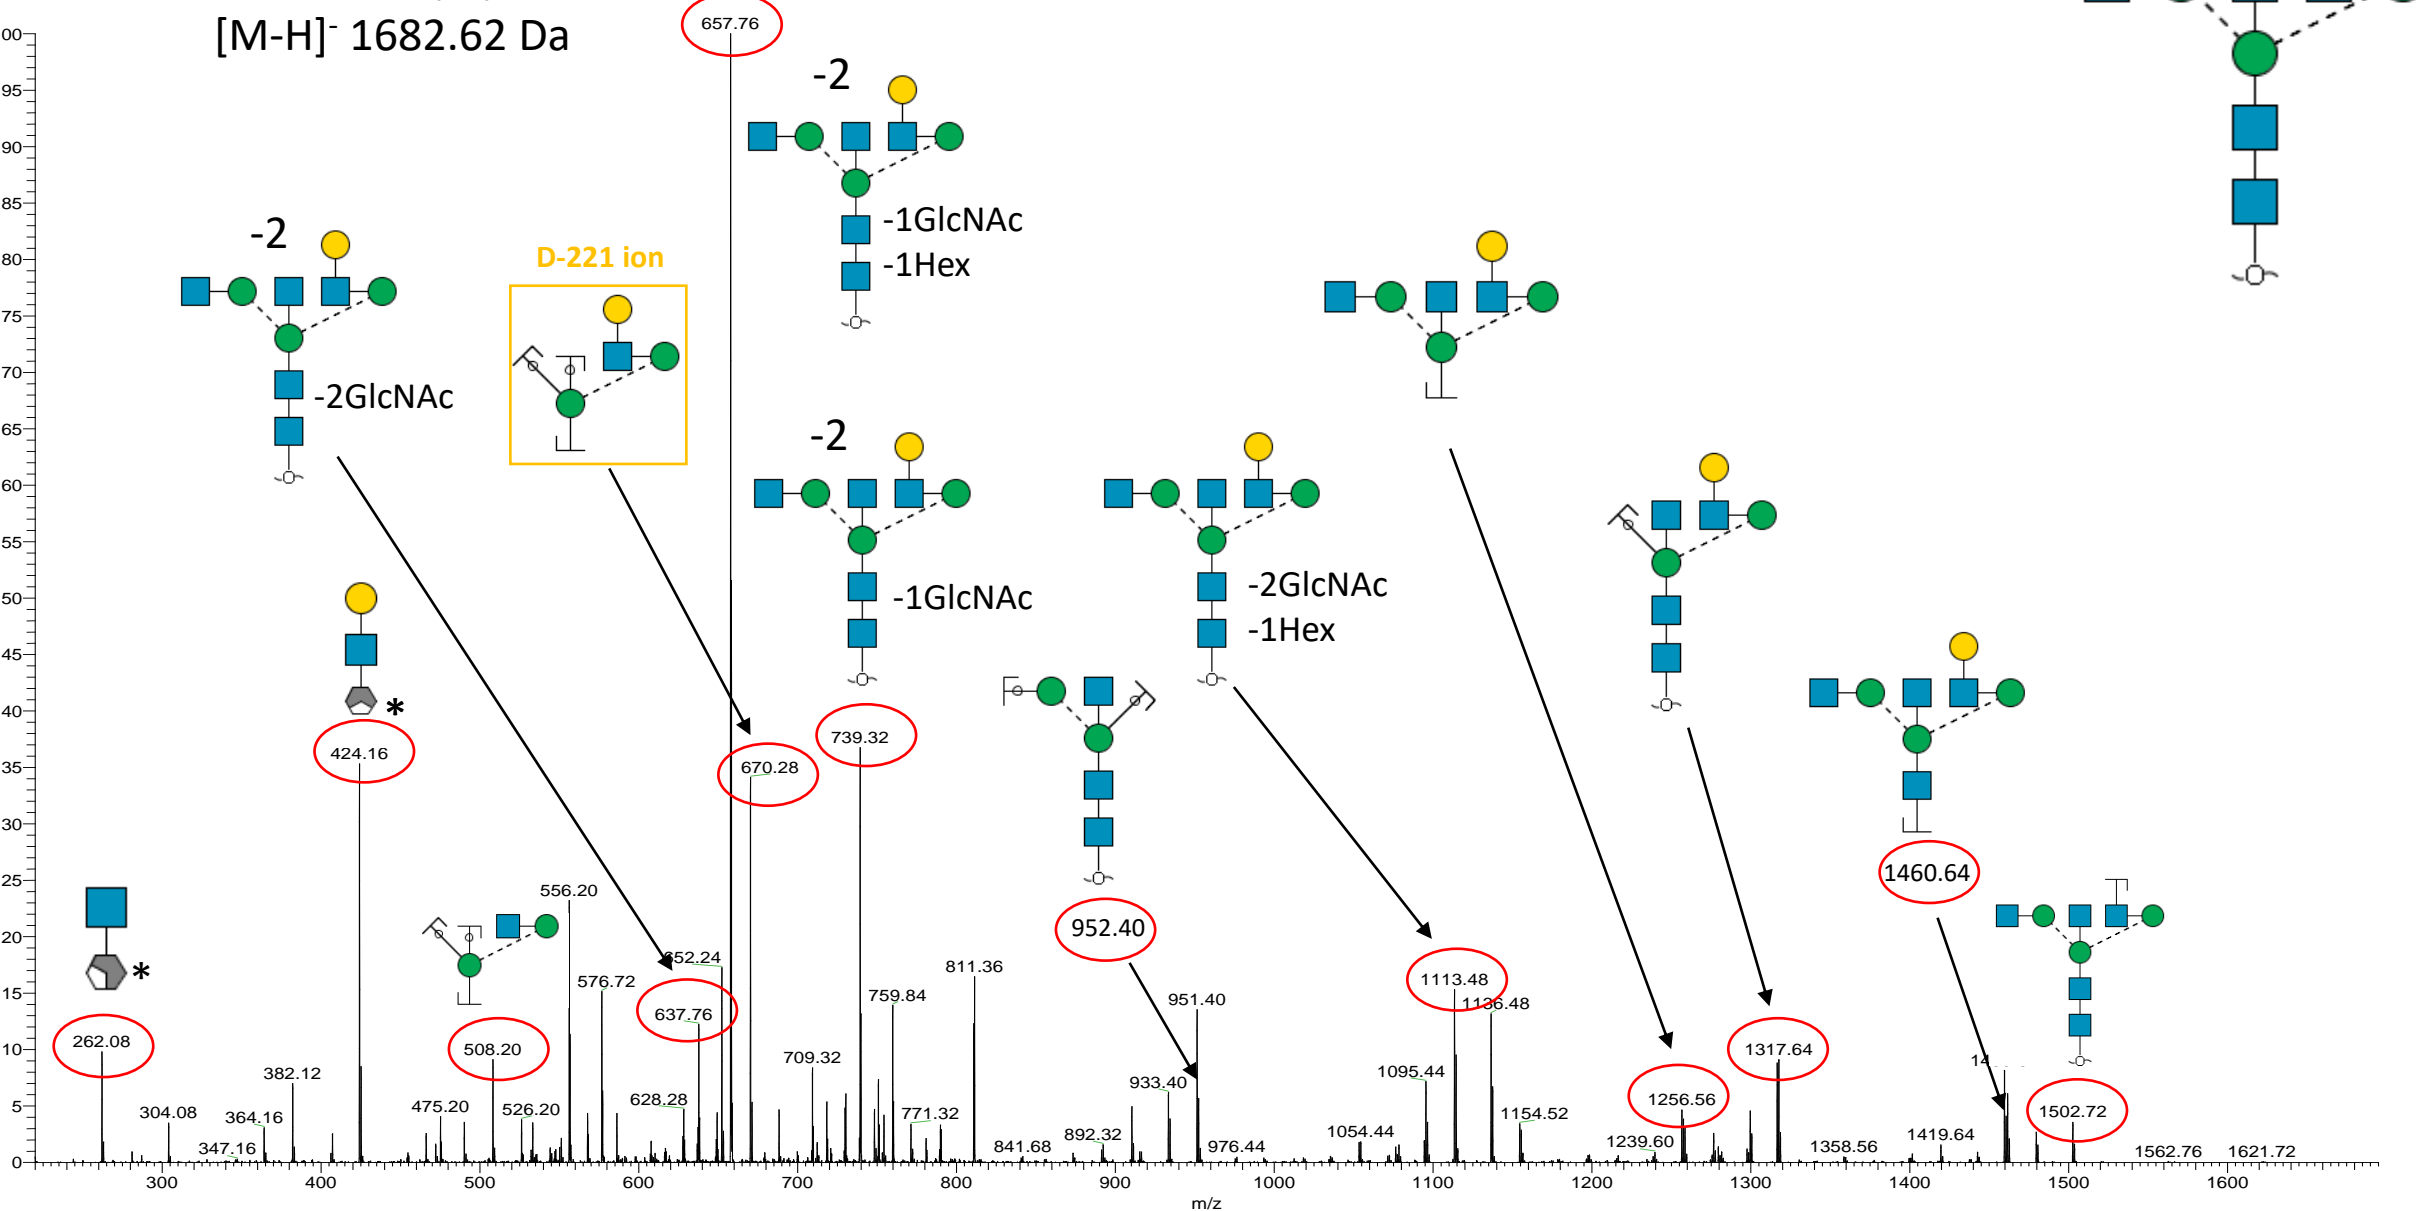

\* Ambiguity of the cross-ring fragments

Observed  $m/z$  913.86 (2-), RT: ~20.8 min  
[M-H]<sup>-</sup> 1828.68 Da

A hierarchical tree diagram starting from a root node at the bottom, which is a small white circle with two wavy lines. The root has one child, a blue square. This square has one child, another blue square. This second square has three children: a green circle (left), a blue square (middle), and a red triangle (right). The middle blue square has three children: a green circle (left), a yellow circle (top), and a green circle (right). The leftmost green circle has one child, a blue square. Dashed lines connect the following pairs of nodes: the top-most green circle to its parent blue square; the middle-most green circle to its parent blue square; and the rightmost green circle to its parent blue square.

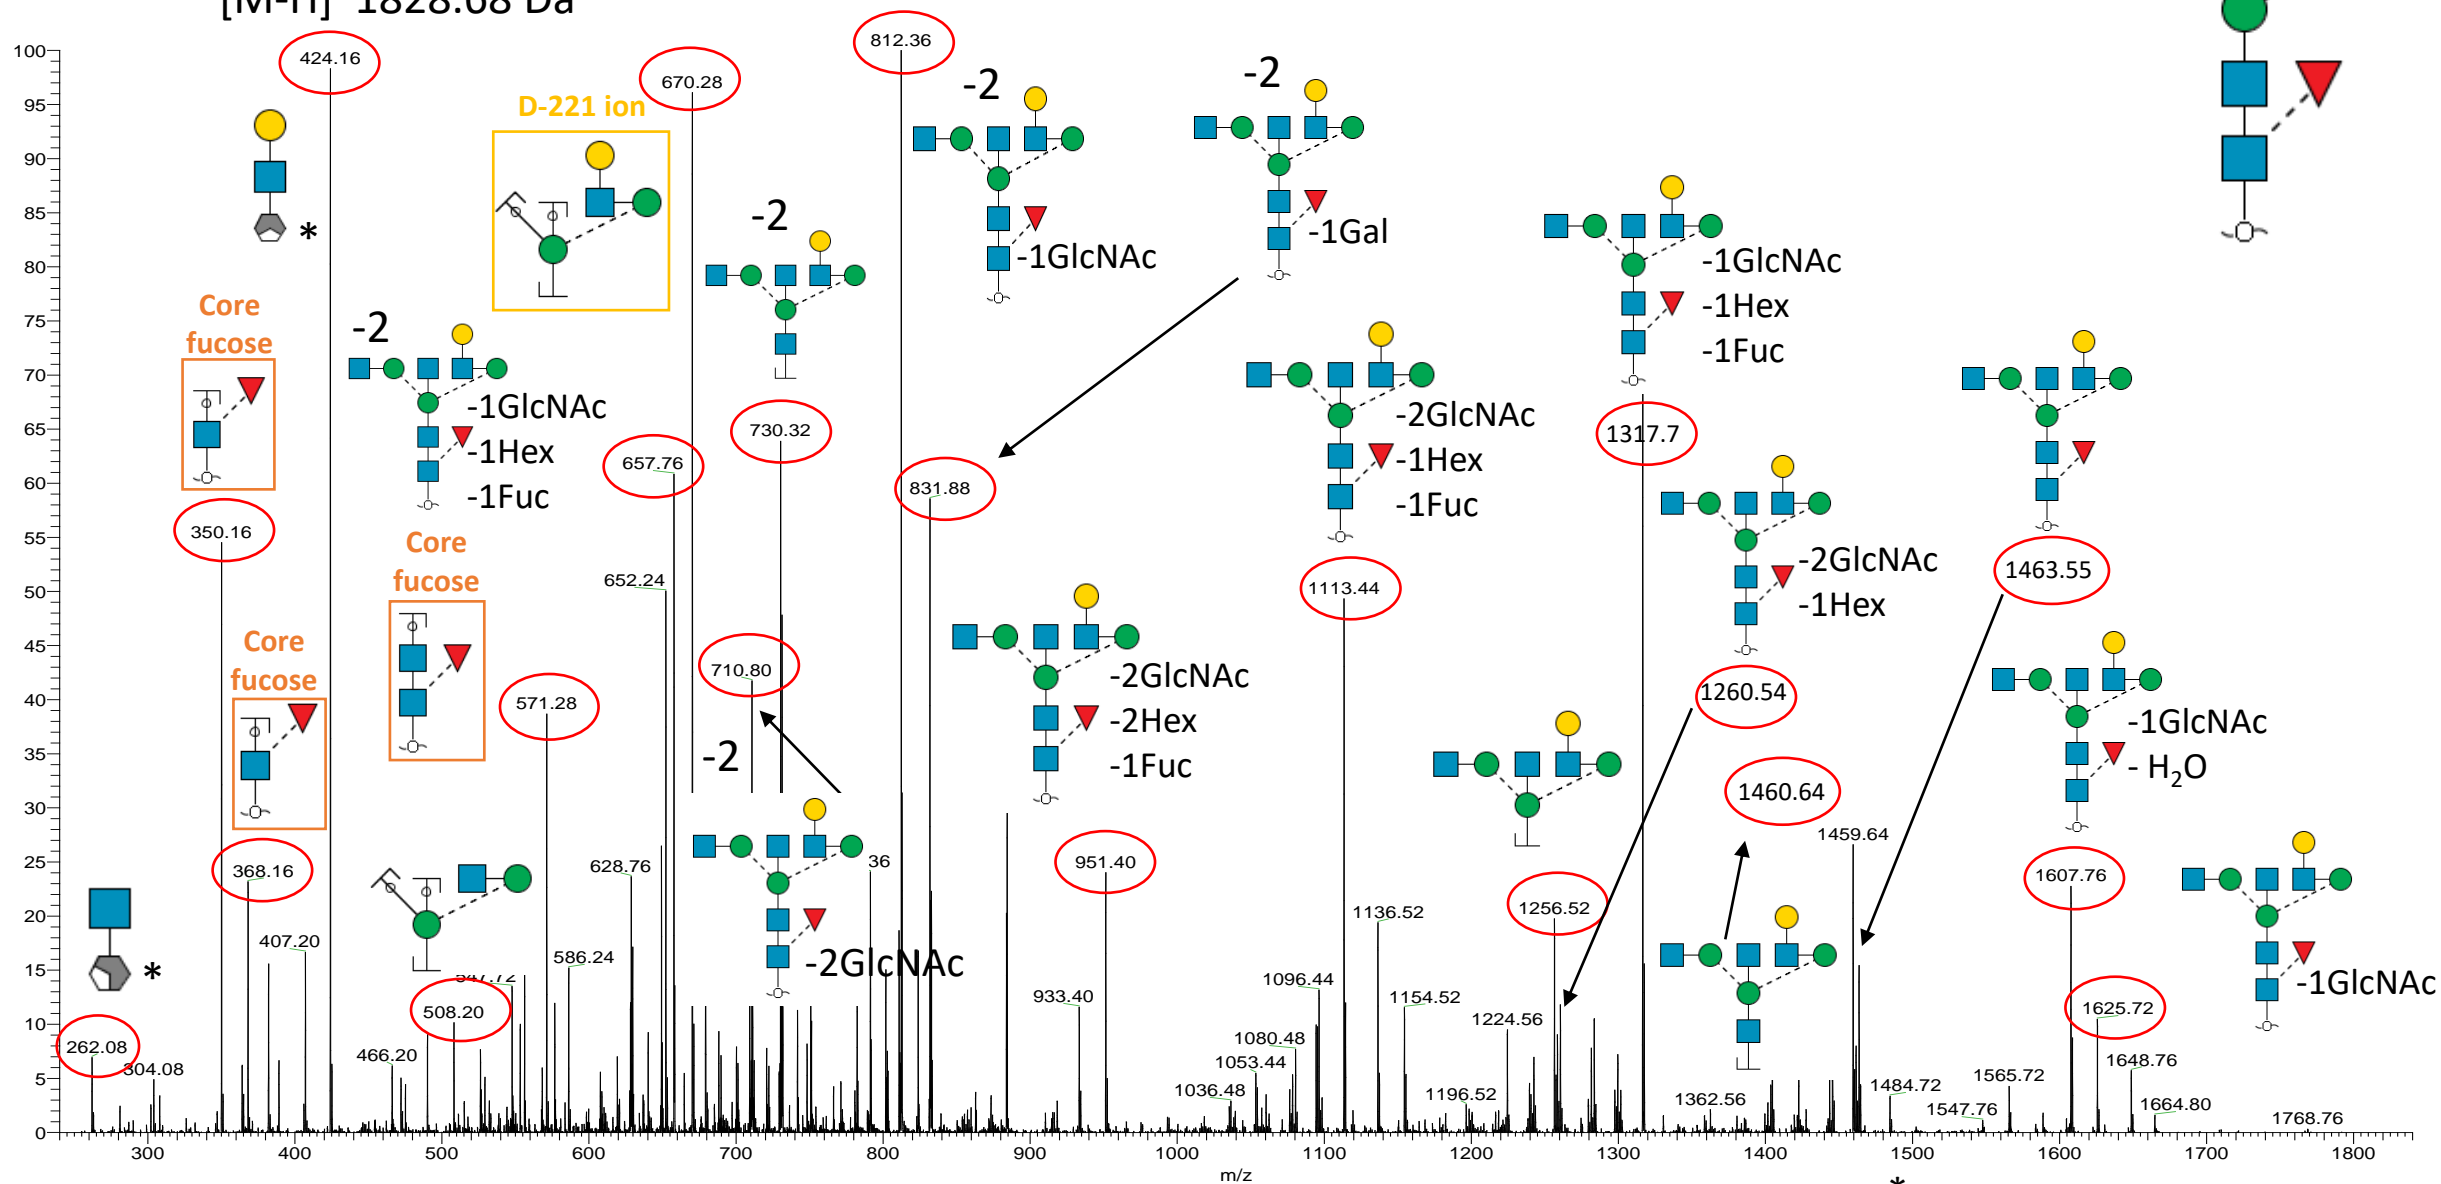

\*Ambiguity of the cross-ring fragments

Glycan #29

Observed  $m/z$  986.40 (2-), RT: ~18.9 min  
[M-H]<sup>-</sup> 1973.72 Da

Note: Based on the very early PGC-LC elution time and the D-221 ion, this structure is assigned as a bisecting GlcNAc. Based on PGC-LC elution pattern, this glycan is annotated as the  $\alpha$ 2,6-sialyl linkage isomer.

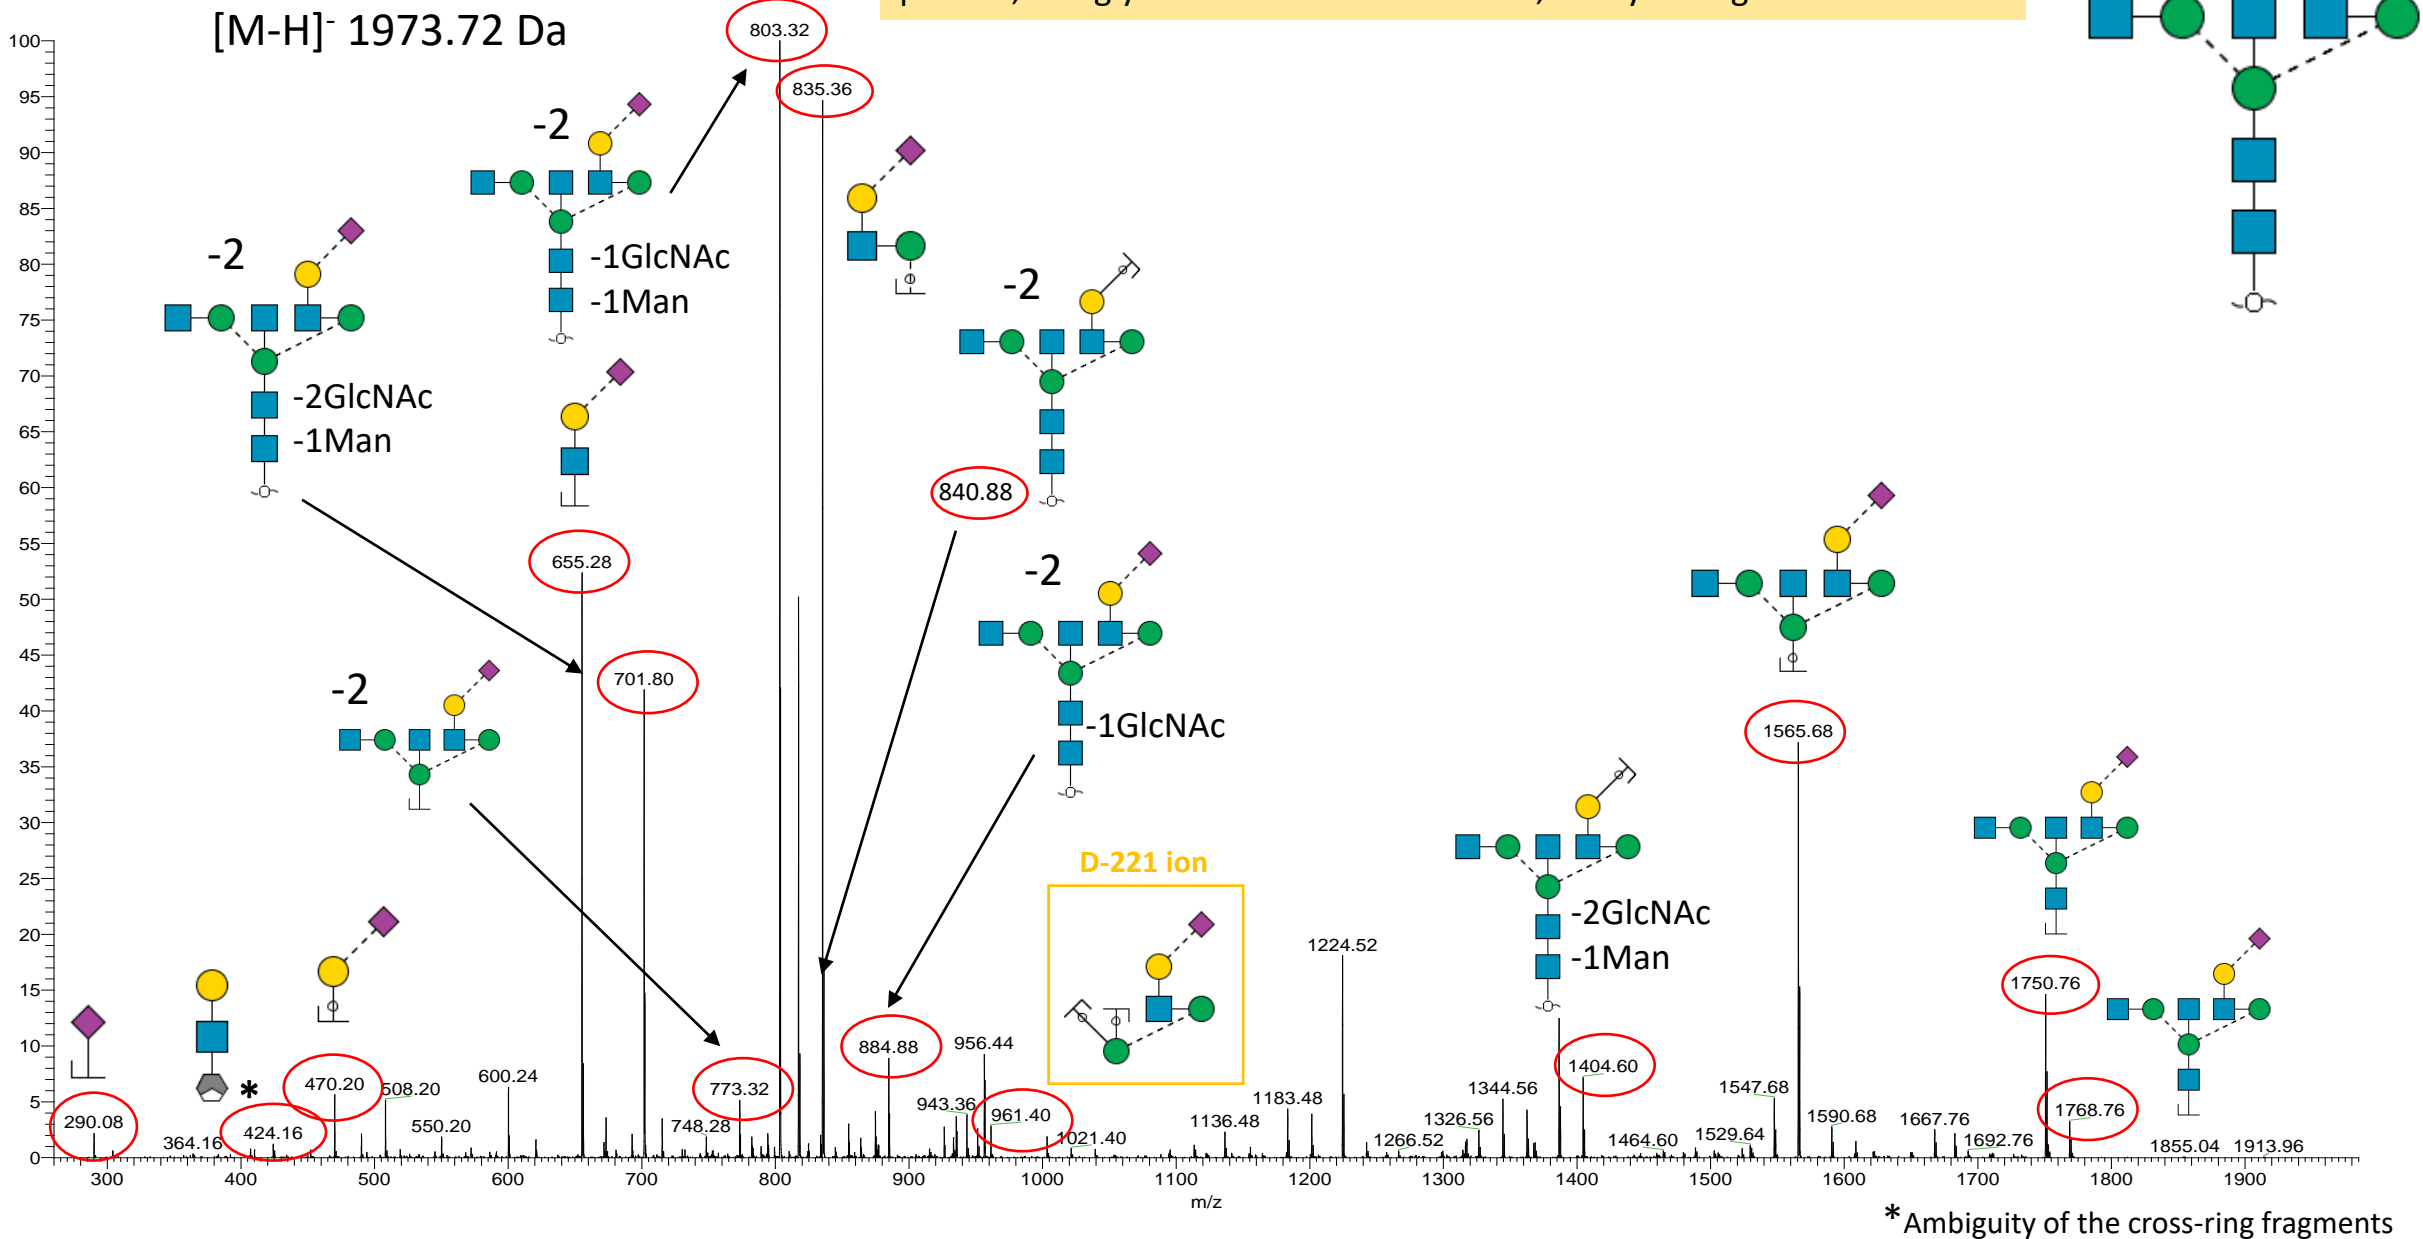

Glycan #30

Observed  $m/z$  1059.42 (2-), RT: ~22.5 min  
[M-H]<sup>-</sup> 2119.78 Da

Note: Based on the very early PGC-LC elution time and the abundant D-221 ion, this structure is assigned as a bisecting GlcNAc. Based on PGC-LC elution pattern, this glycan is annotated as the  $\alpha$ 2,6-sialyl linkage isomer.

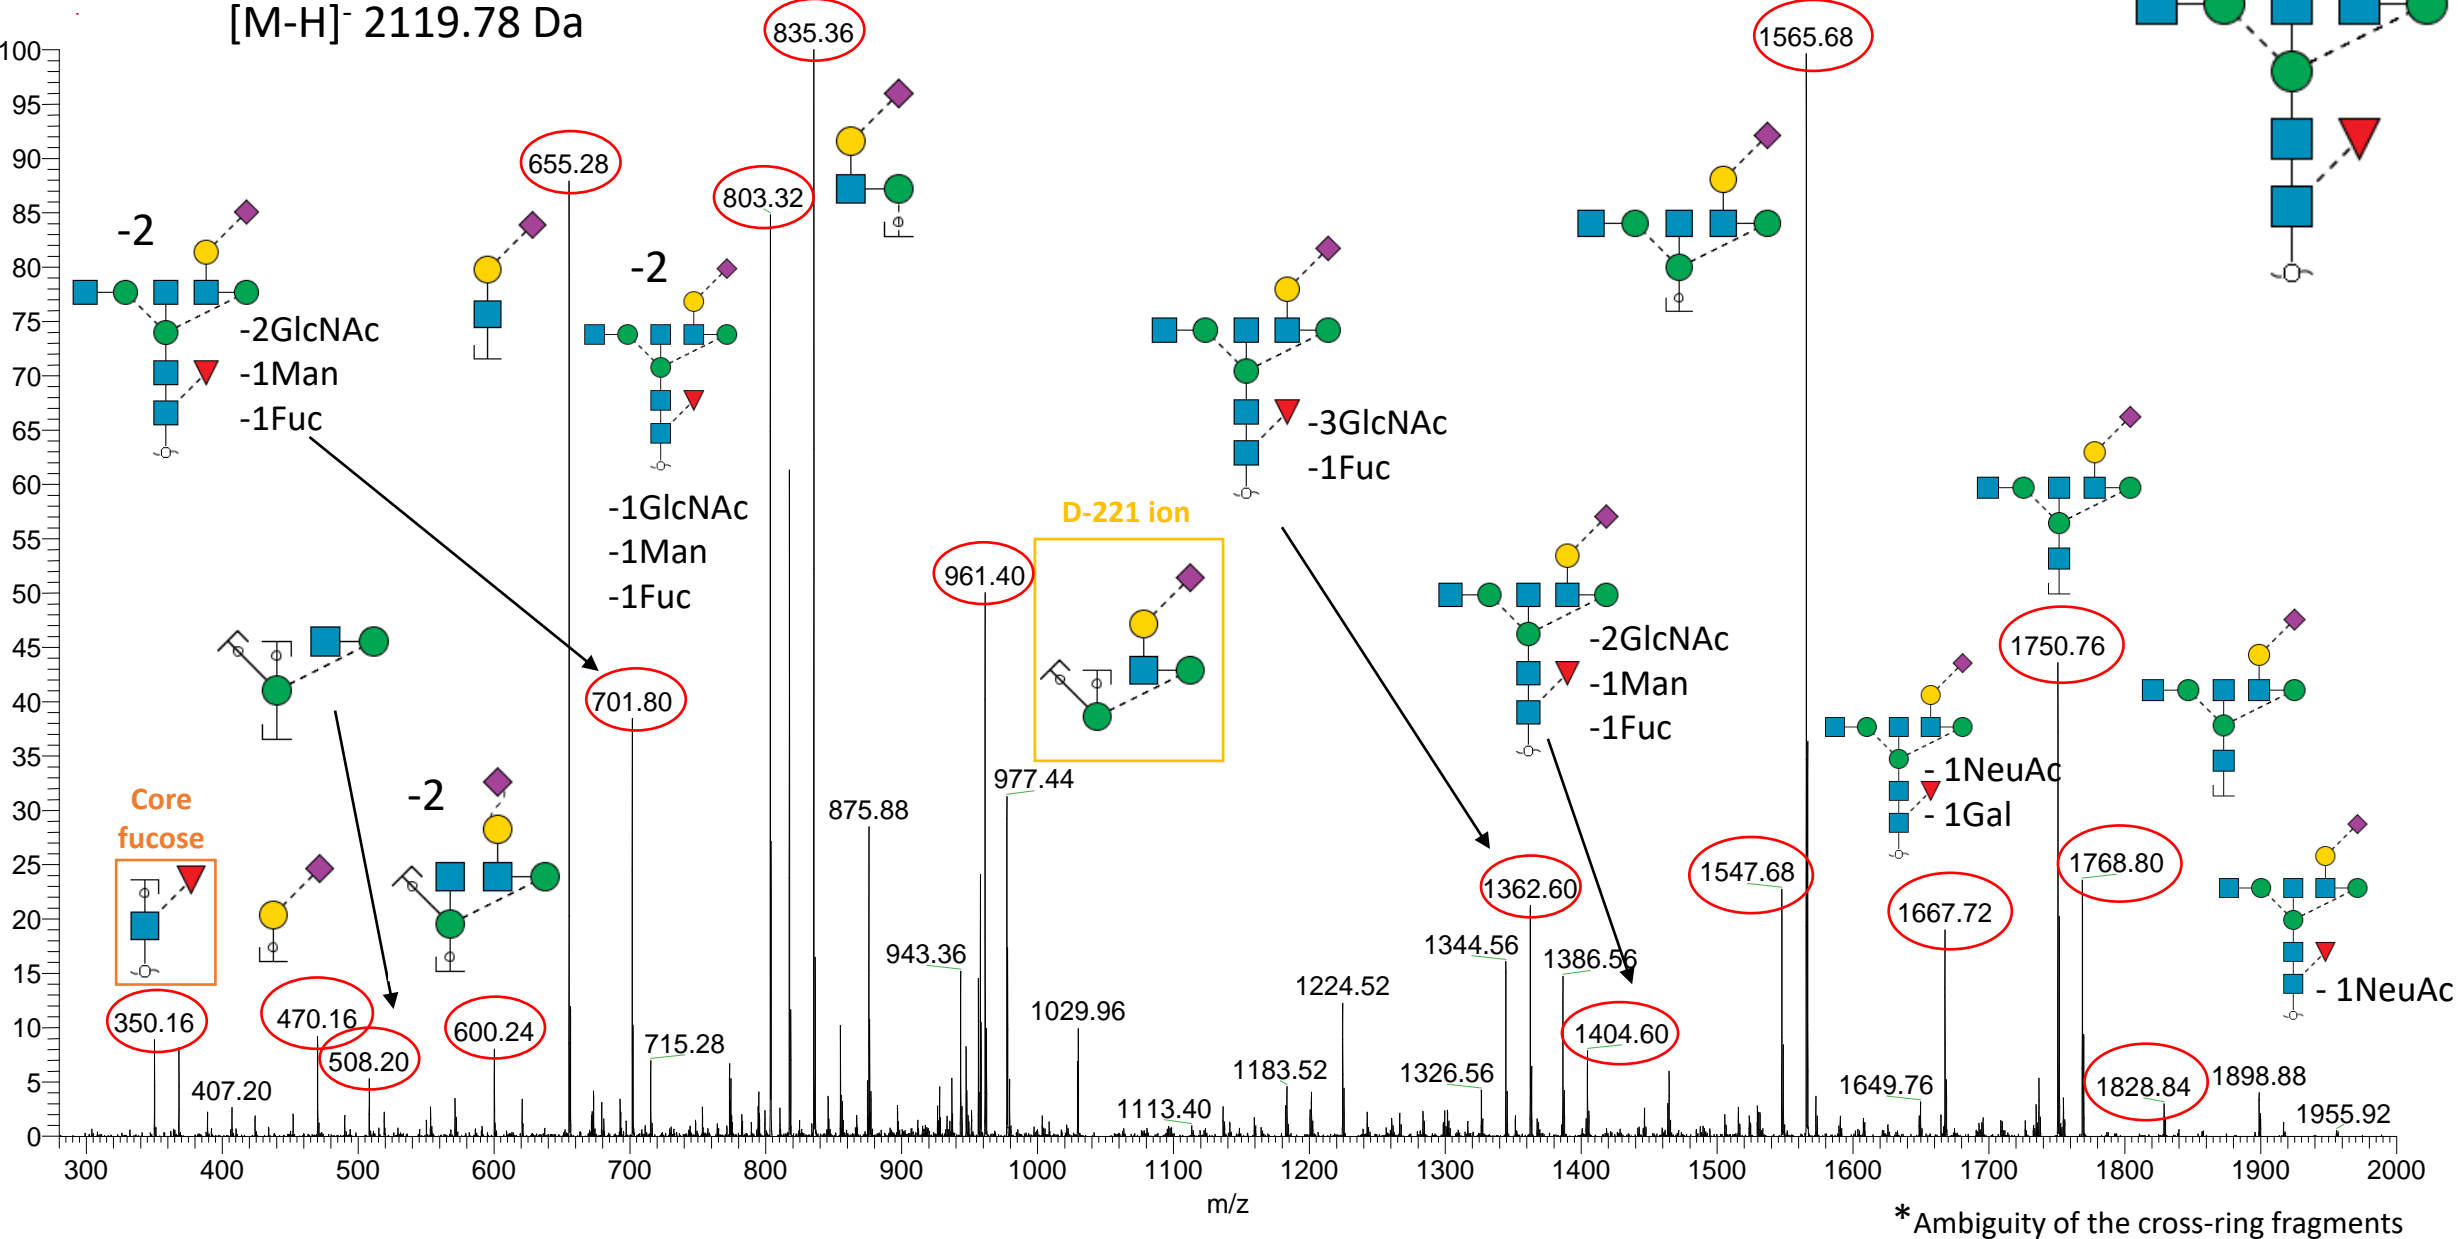



Observed  $m/z$  994.88 (2-), RT: ~22.2 min  
[M-H]<sup>-</sup> 1990.73 Da

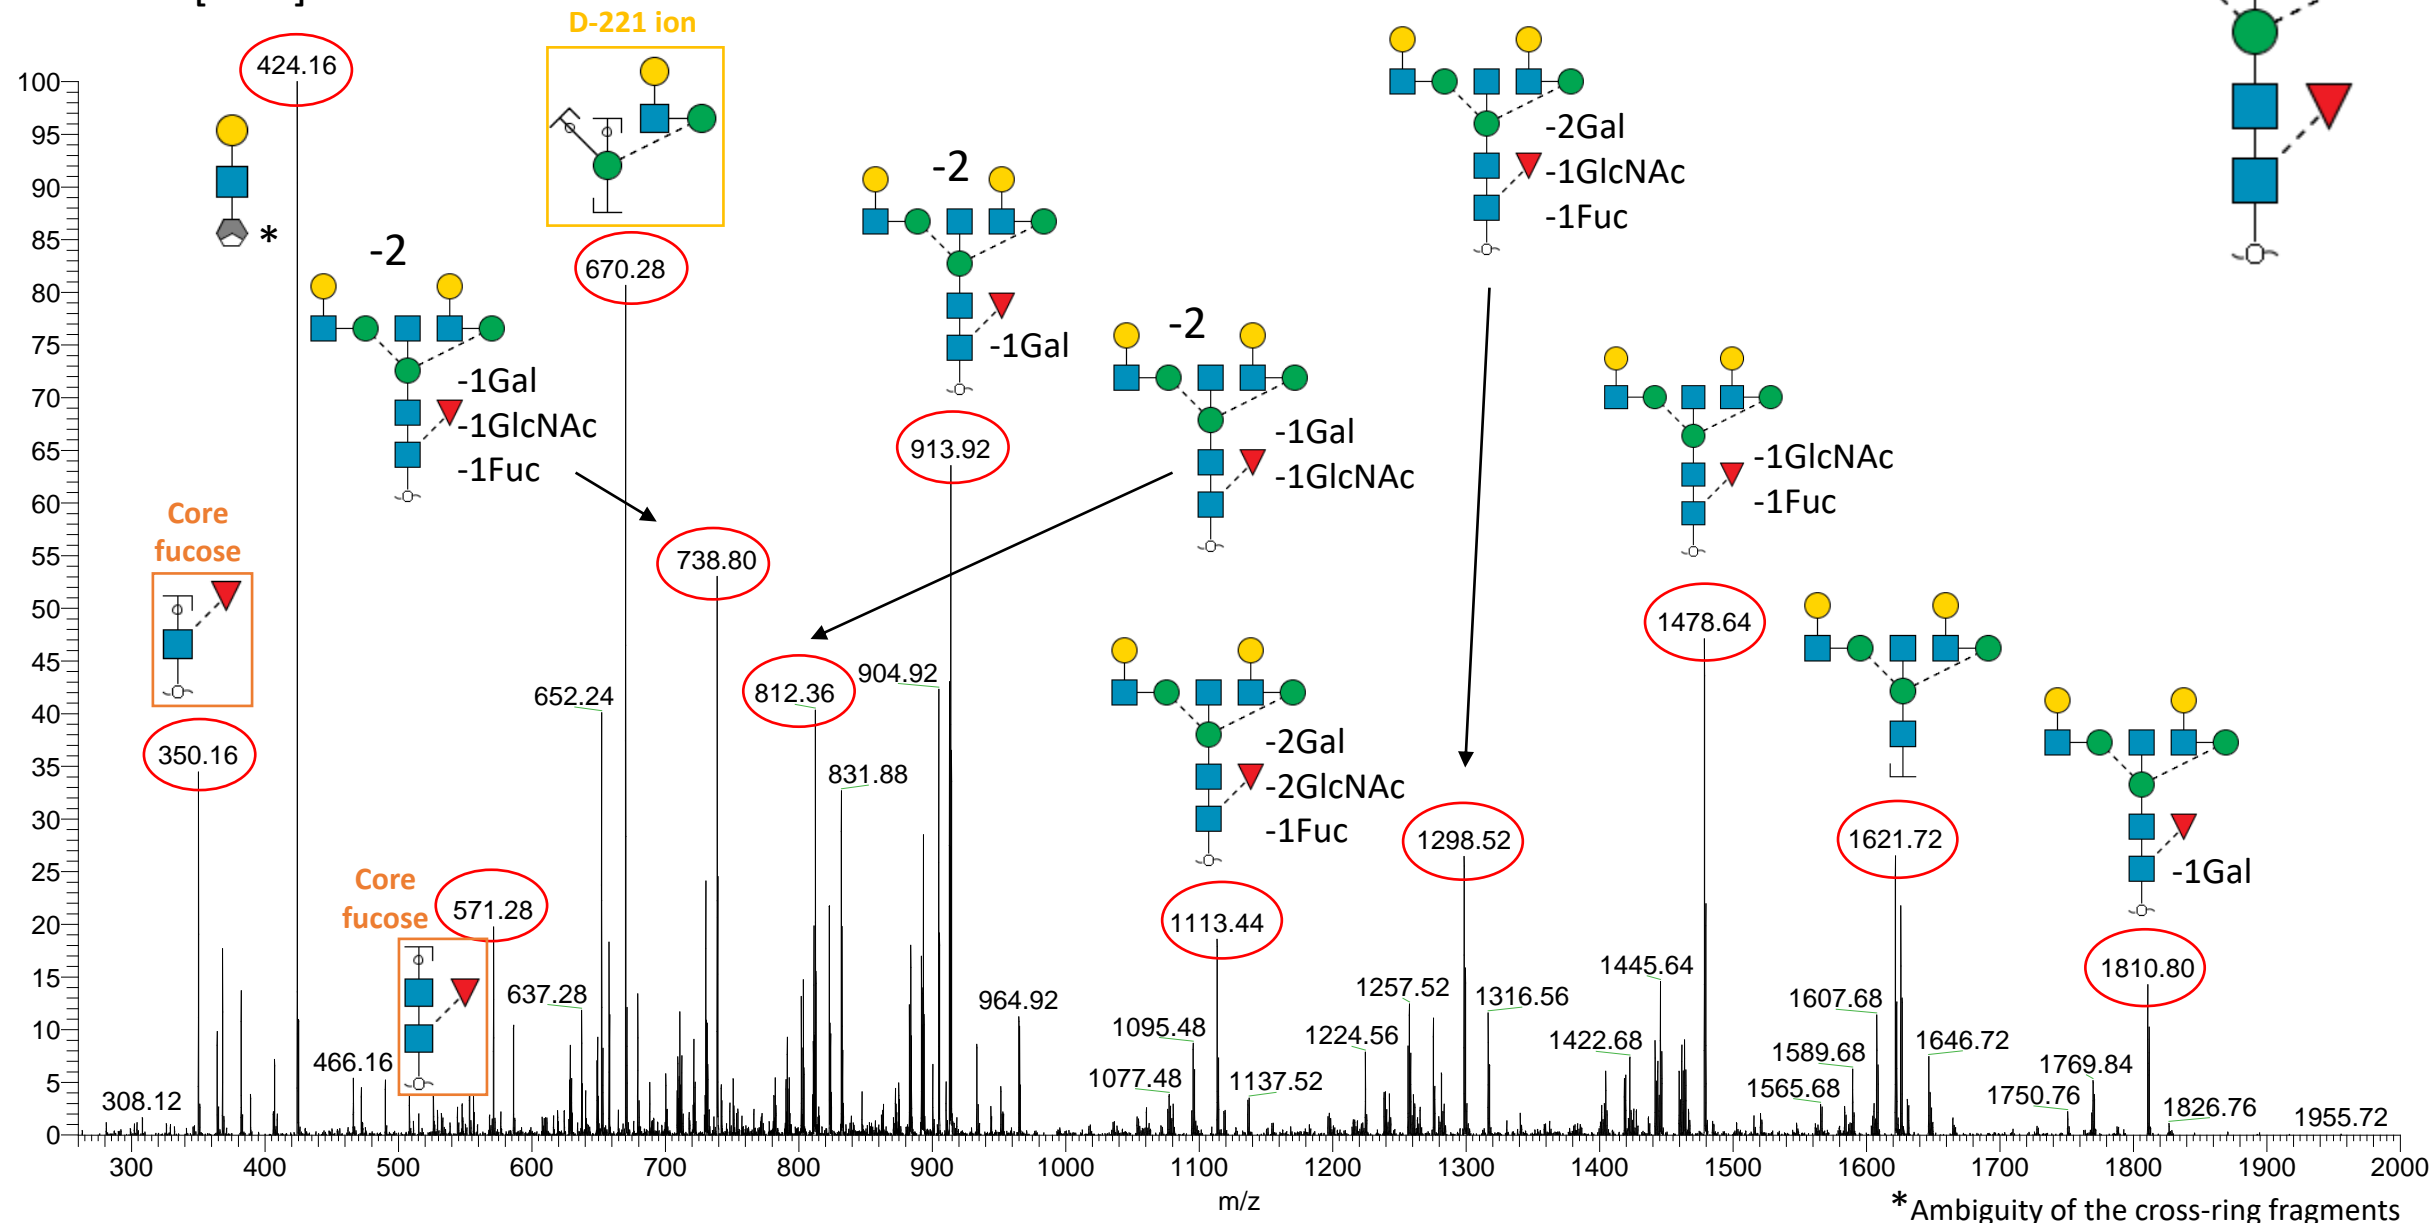

# Glycan #32

Observed  $m/z$  1067.42 (2-), RT: ~20.5 min  
[M-H]<sup>-</sup> 2135.77 Da

Note: Based on the very early PGC-LC elution time and the D-221 ion, this structure is assigned as a bisecting GlcNAc with sialylation, predicted to occupy the  $\alpha$ -1,3 arm. Based on PGC-LC elution pattern, this glycan is annotated as the  $\alpha$ 2,6-sialyl linkage isomer.

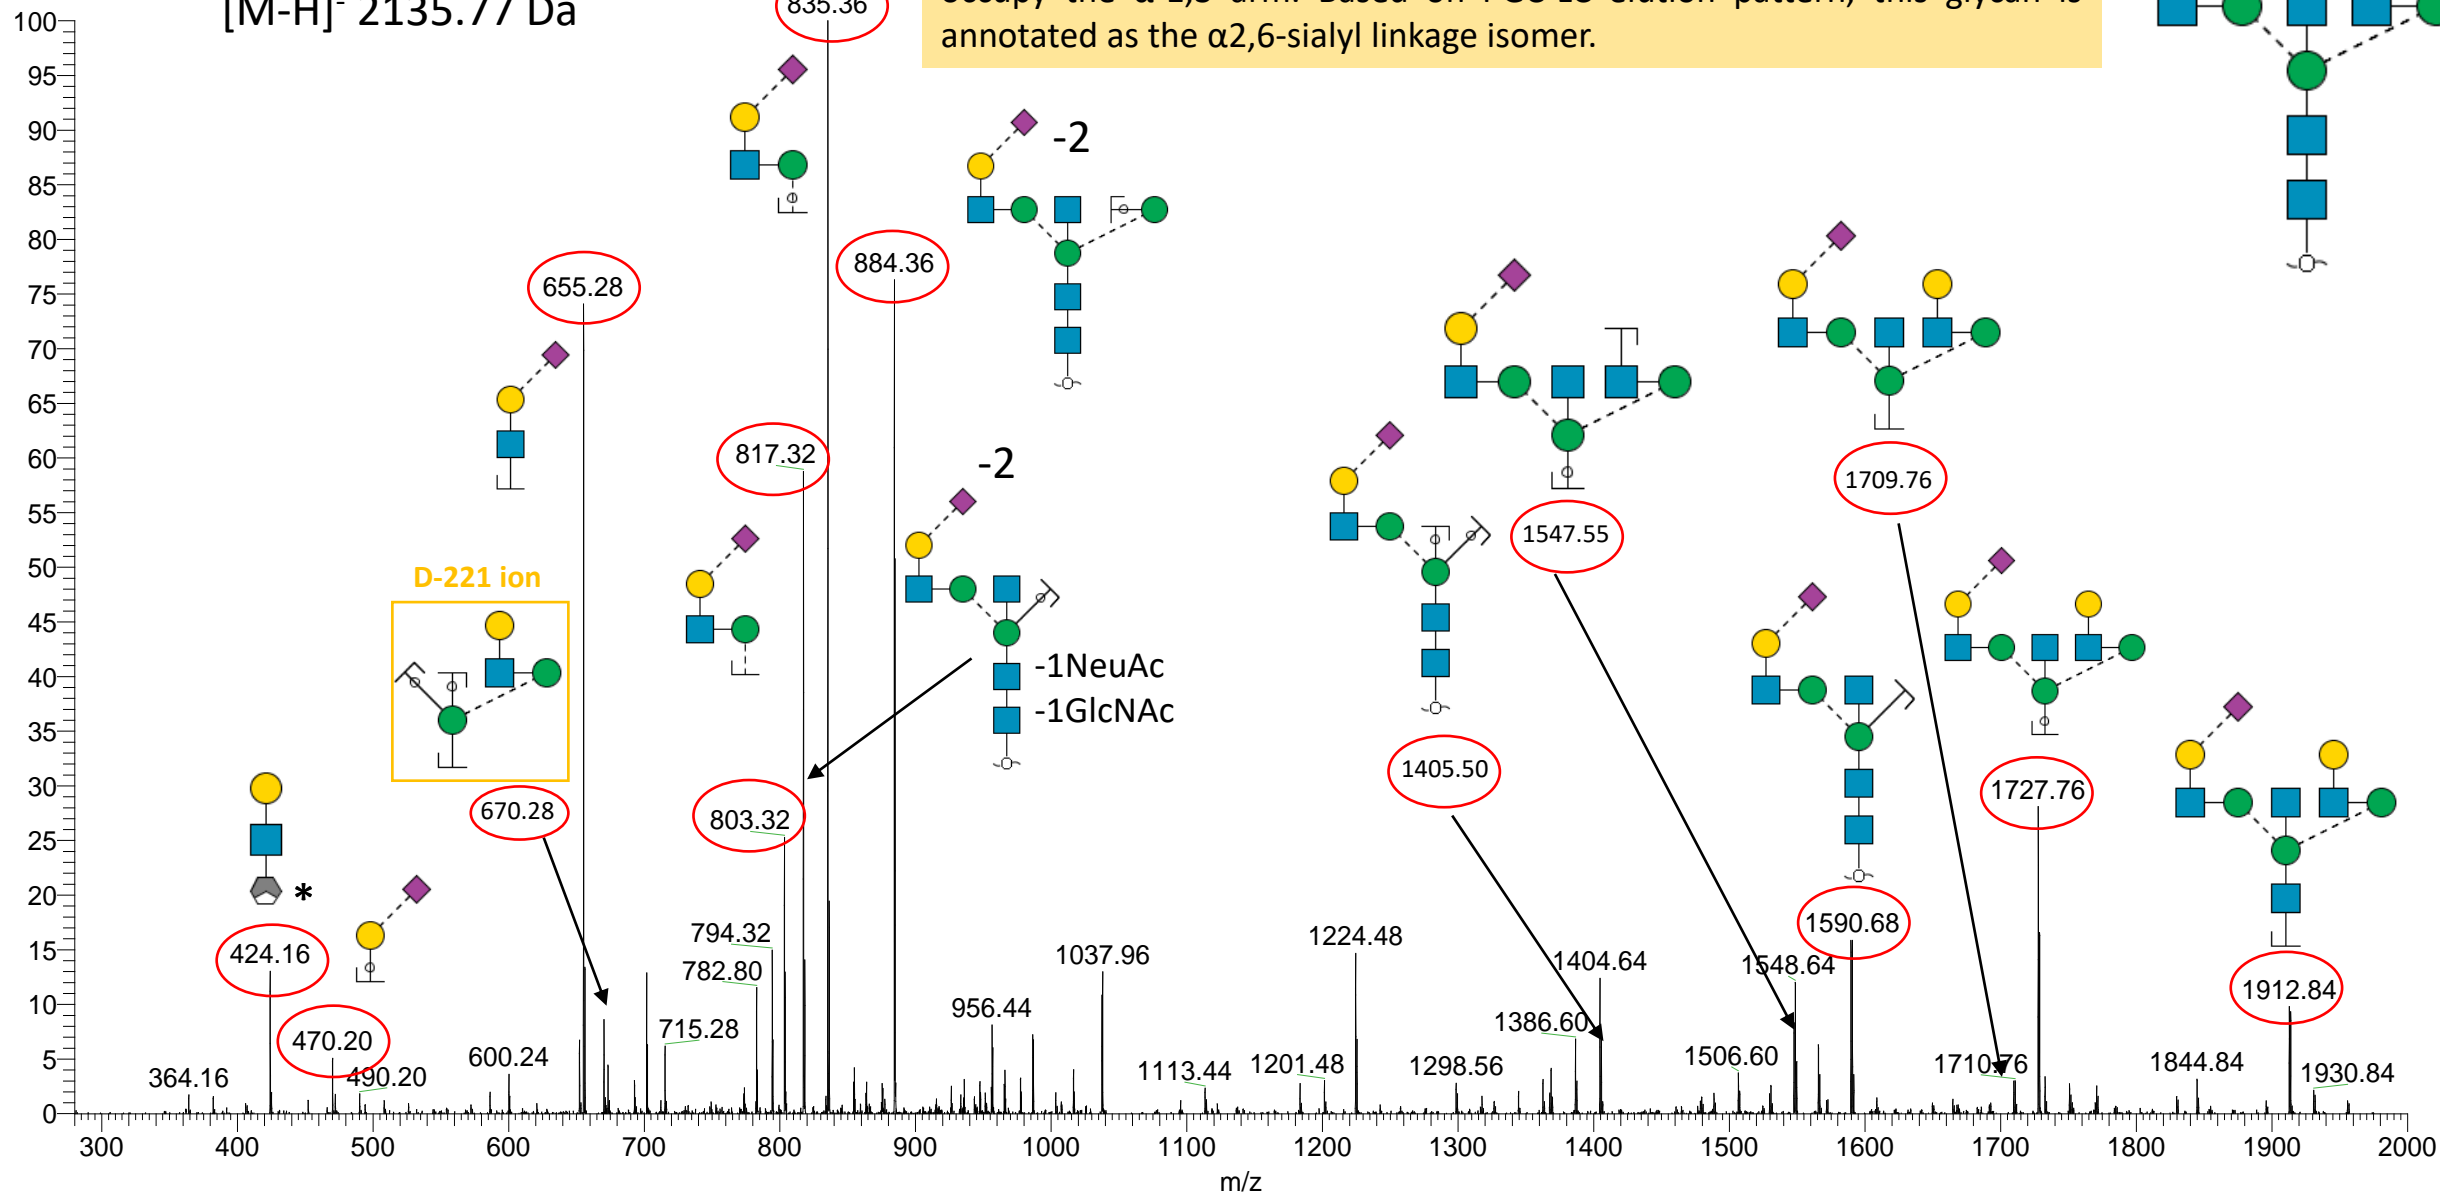

\* Ambiguity of the cross-ring fragments

# Glycan #33

Observed  $m/z$  1140.44 (2-), RT: ~23.7 min  
[M-H]<sup>-</sup> 2135.77 Da

Note: Based on the very early PGC-LC elution time and the D-221 ion, this structure is assigned as a bisecting GlcNAc with sialylation, predicted to occupy the  $\alpha$ -1,3 arm. Based on PGC-LC elution pattern, this glycan is annotated as the  $\alpha$ 2,6-sialyl linkage isomer.

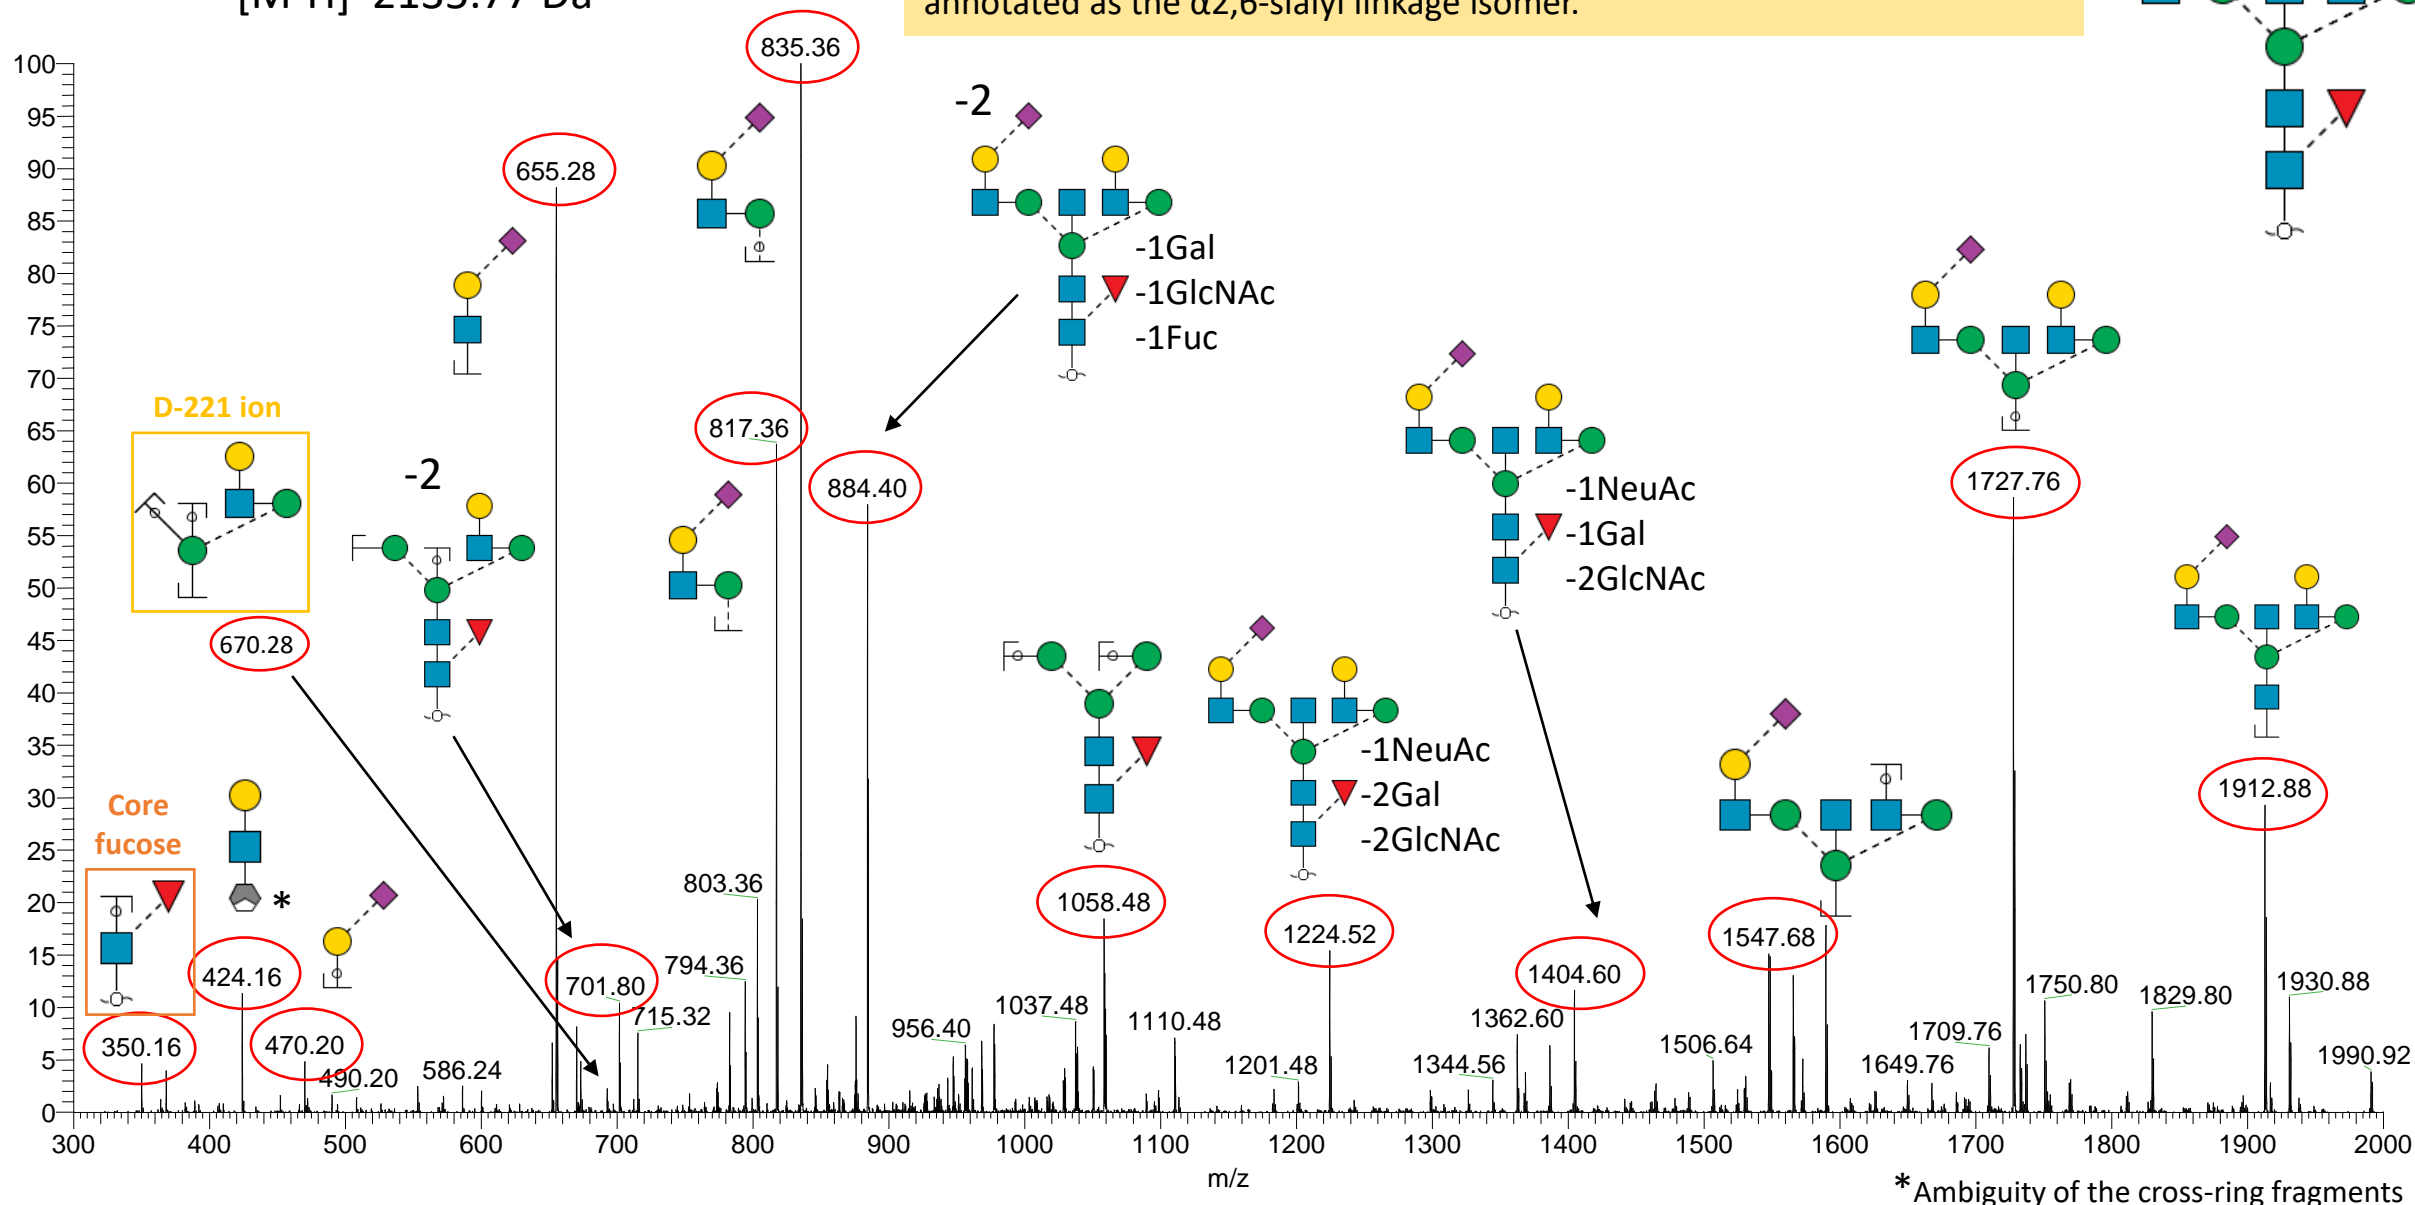

## Glycan #34

Observed  $m/z$  1212.96 (2-), RT: ~23.0 min

$[M-H]^-$  2426.86 Da

Note: Based on the very early PGC-LC elution time and the D-221 ion, this structure is assigned as a bisecting GlcNAc. Based on PGC-LC elution pattern, this glycan is annotated as the  $\alpha 2,6$ - $\alpha 2,6$ -sialyl linkage isomer.

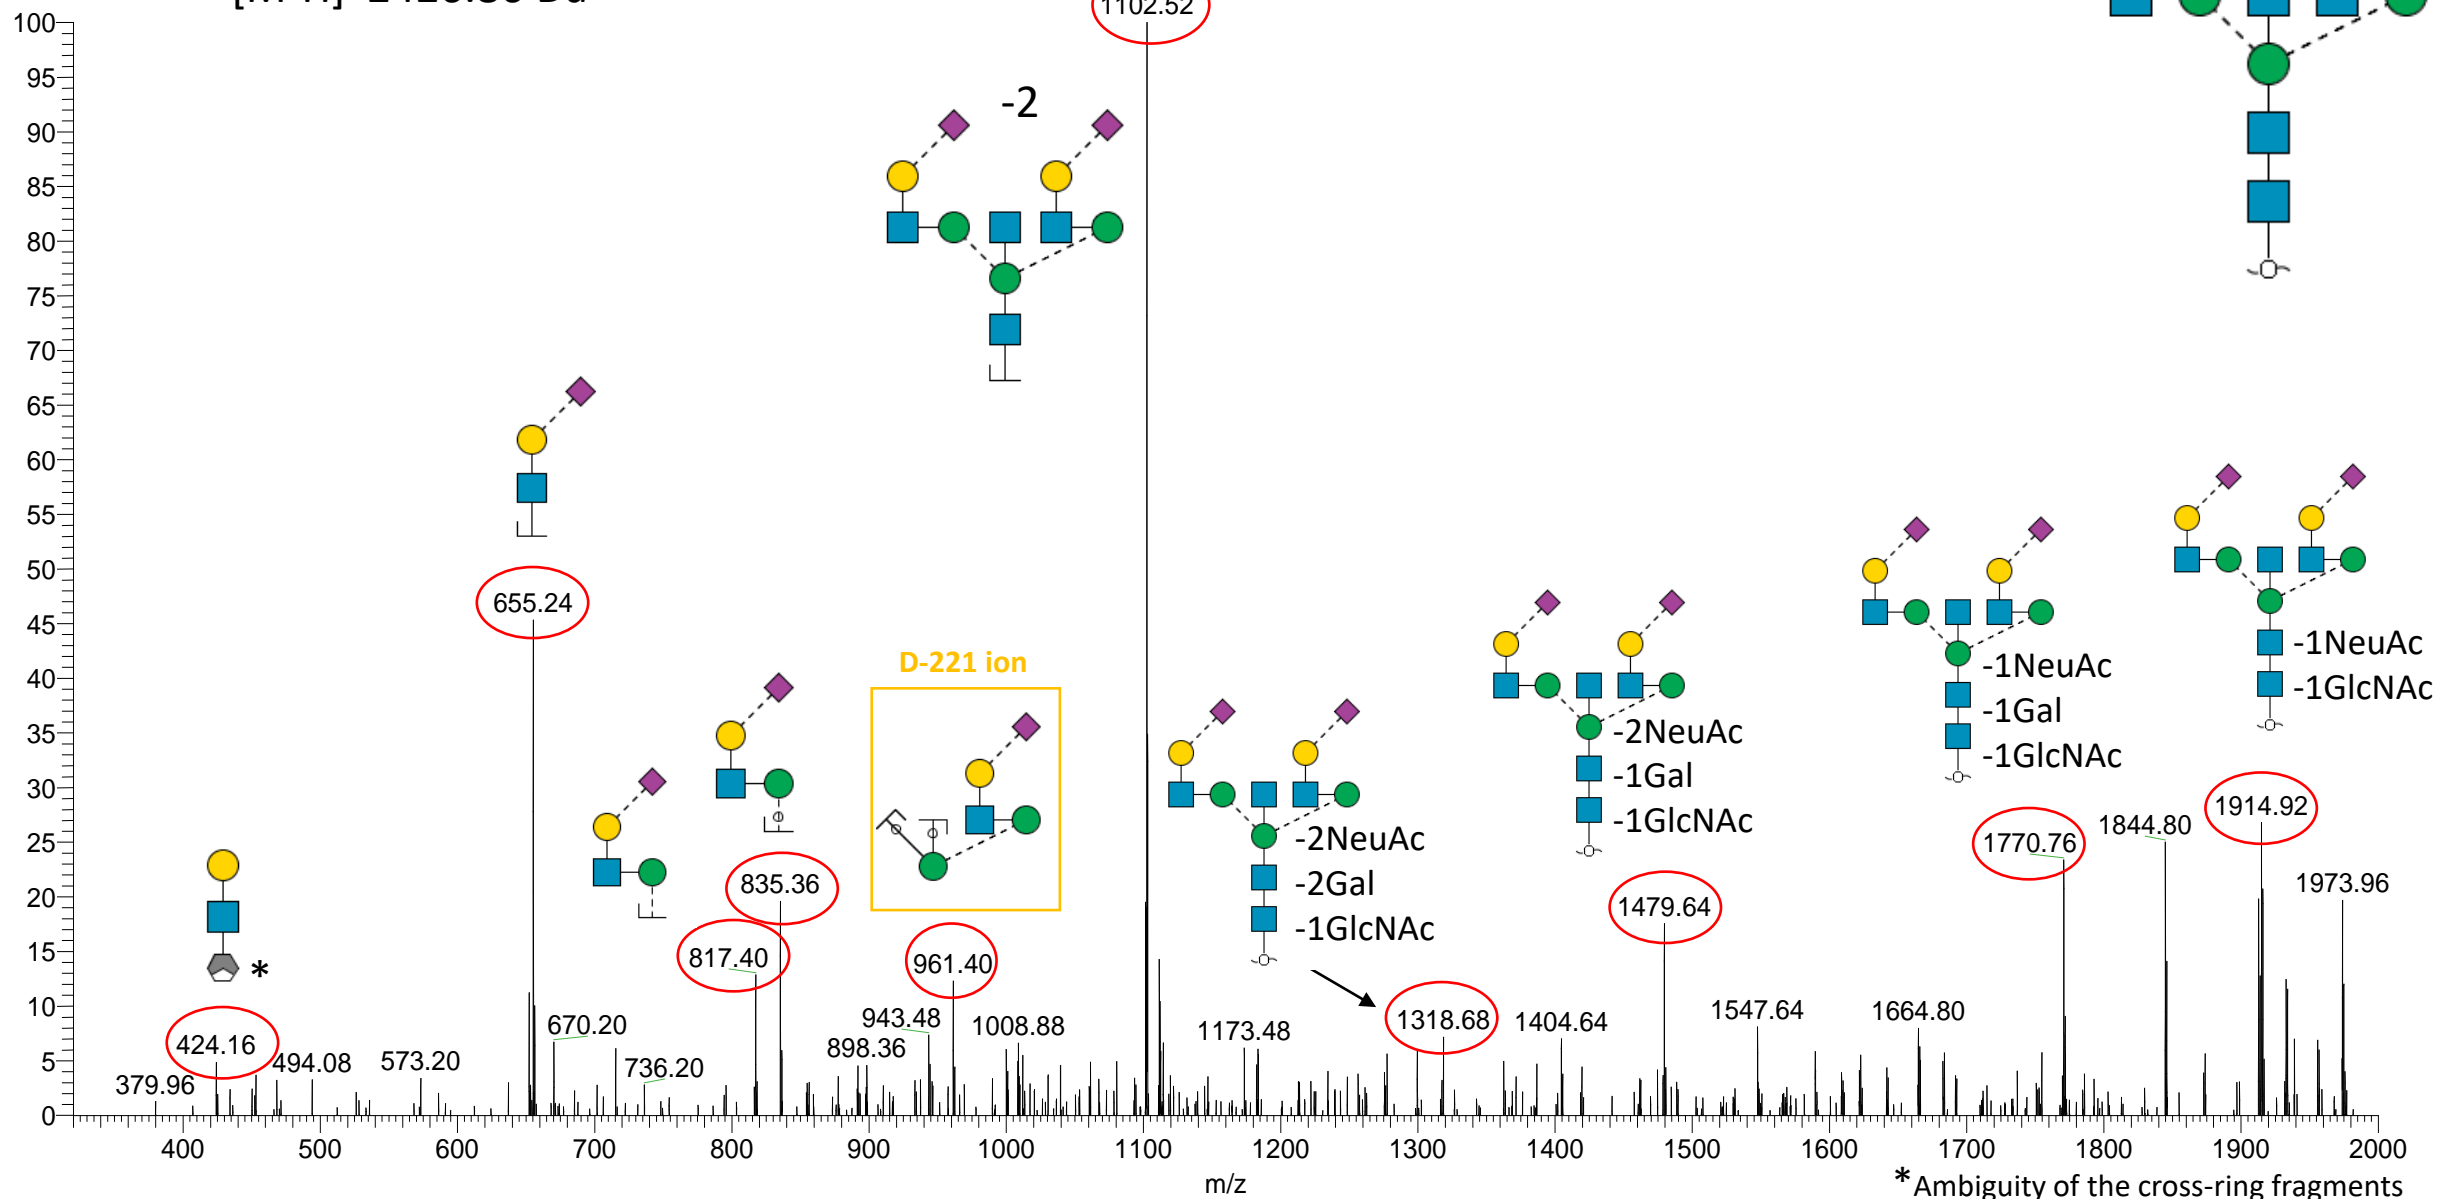

## Glycan #35

Observed  $m/z$  1286.02 (2-), RT: ~25.1 min  
[M-H]<sup>-</sup> 2572.92 Da

Note: Based on the very early PGC-LC elution time and the D-221 ion, this structure is assigned as a bisecting GlcNAc. Based on PGC-LC elution pattern, this glycan is annotated as the  $\alpha$ 2,6- $\alpha$ 2,6-sialyl linkage isomer.

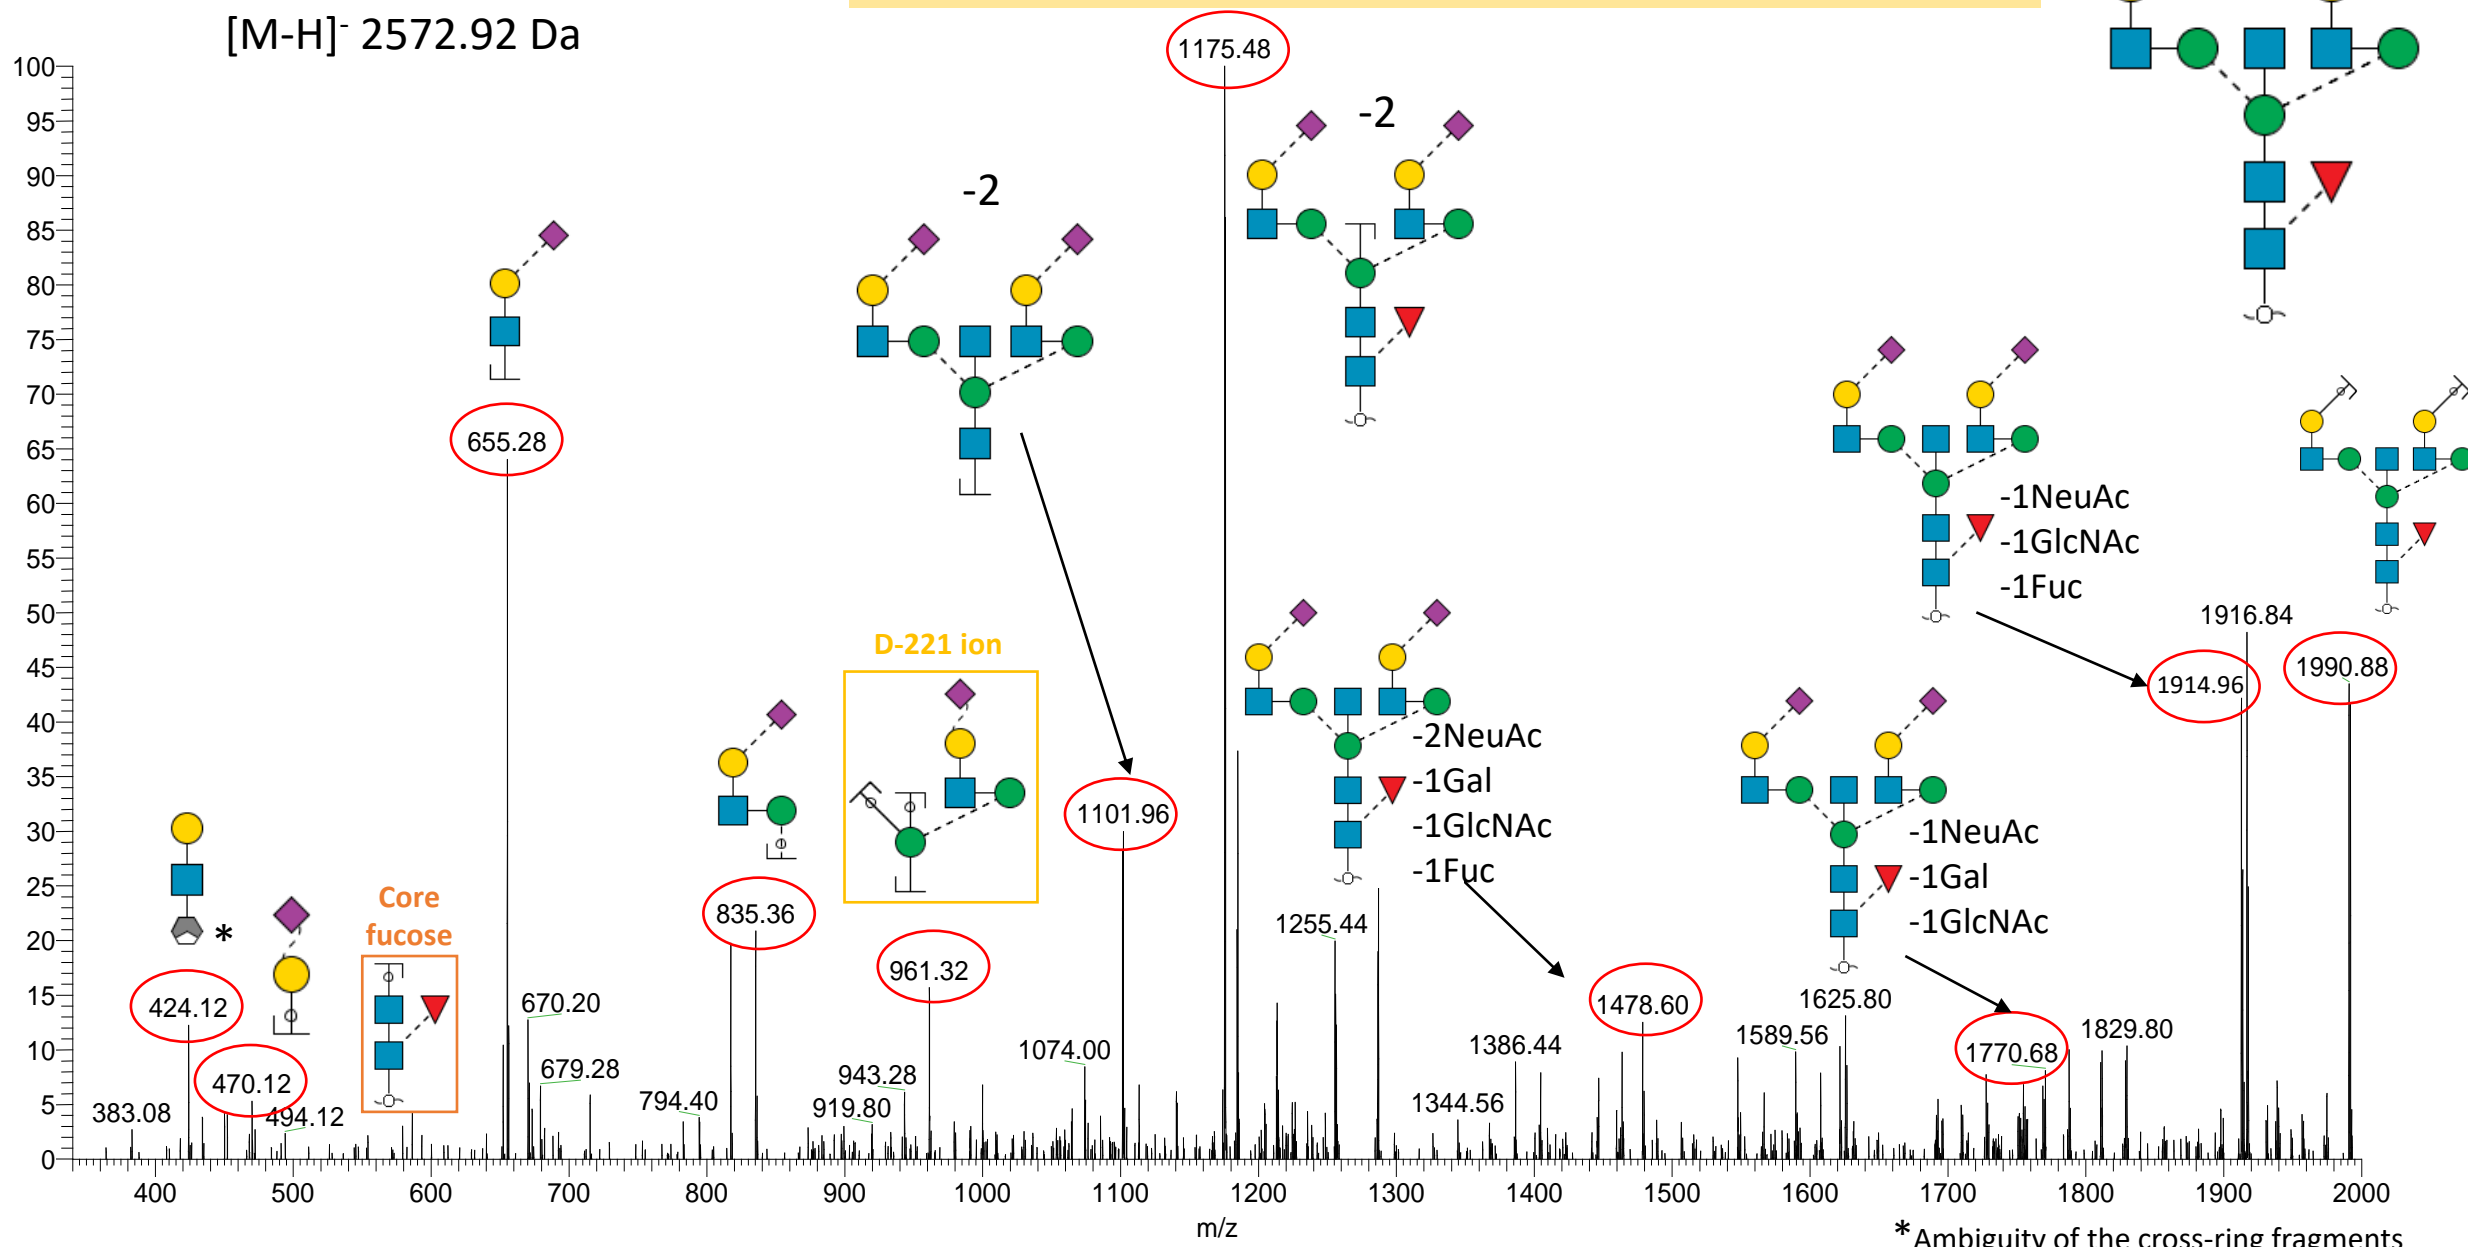

Glycan #36a

Observed  $m/z$  1148.44 (2-), RT: ~28.5 min  
[M-H]<sup>-</sup> 2297.82 Da

Note: Based on PGC-LC elution pattern, this glycan is annotated as the  $\alpha$ 2,6-sialyl linkage isomer but the exact position cannot be determined. No D ion observed to allocate antennary branching and sialic acid.

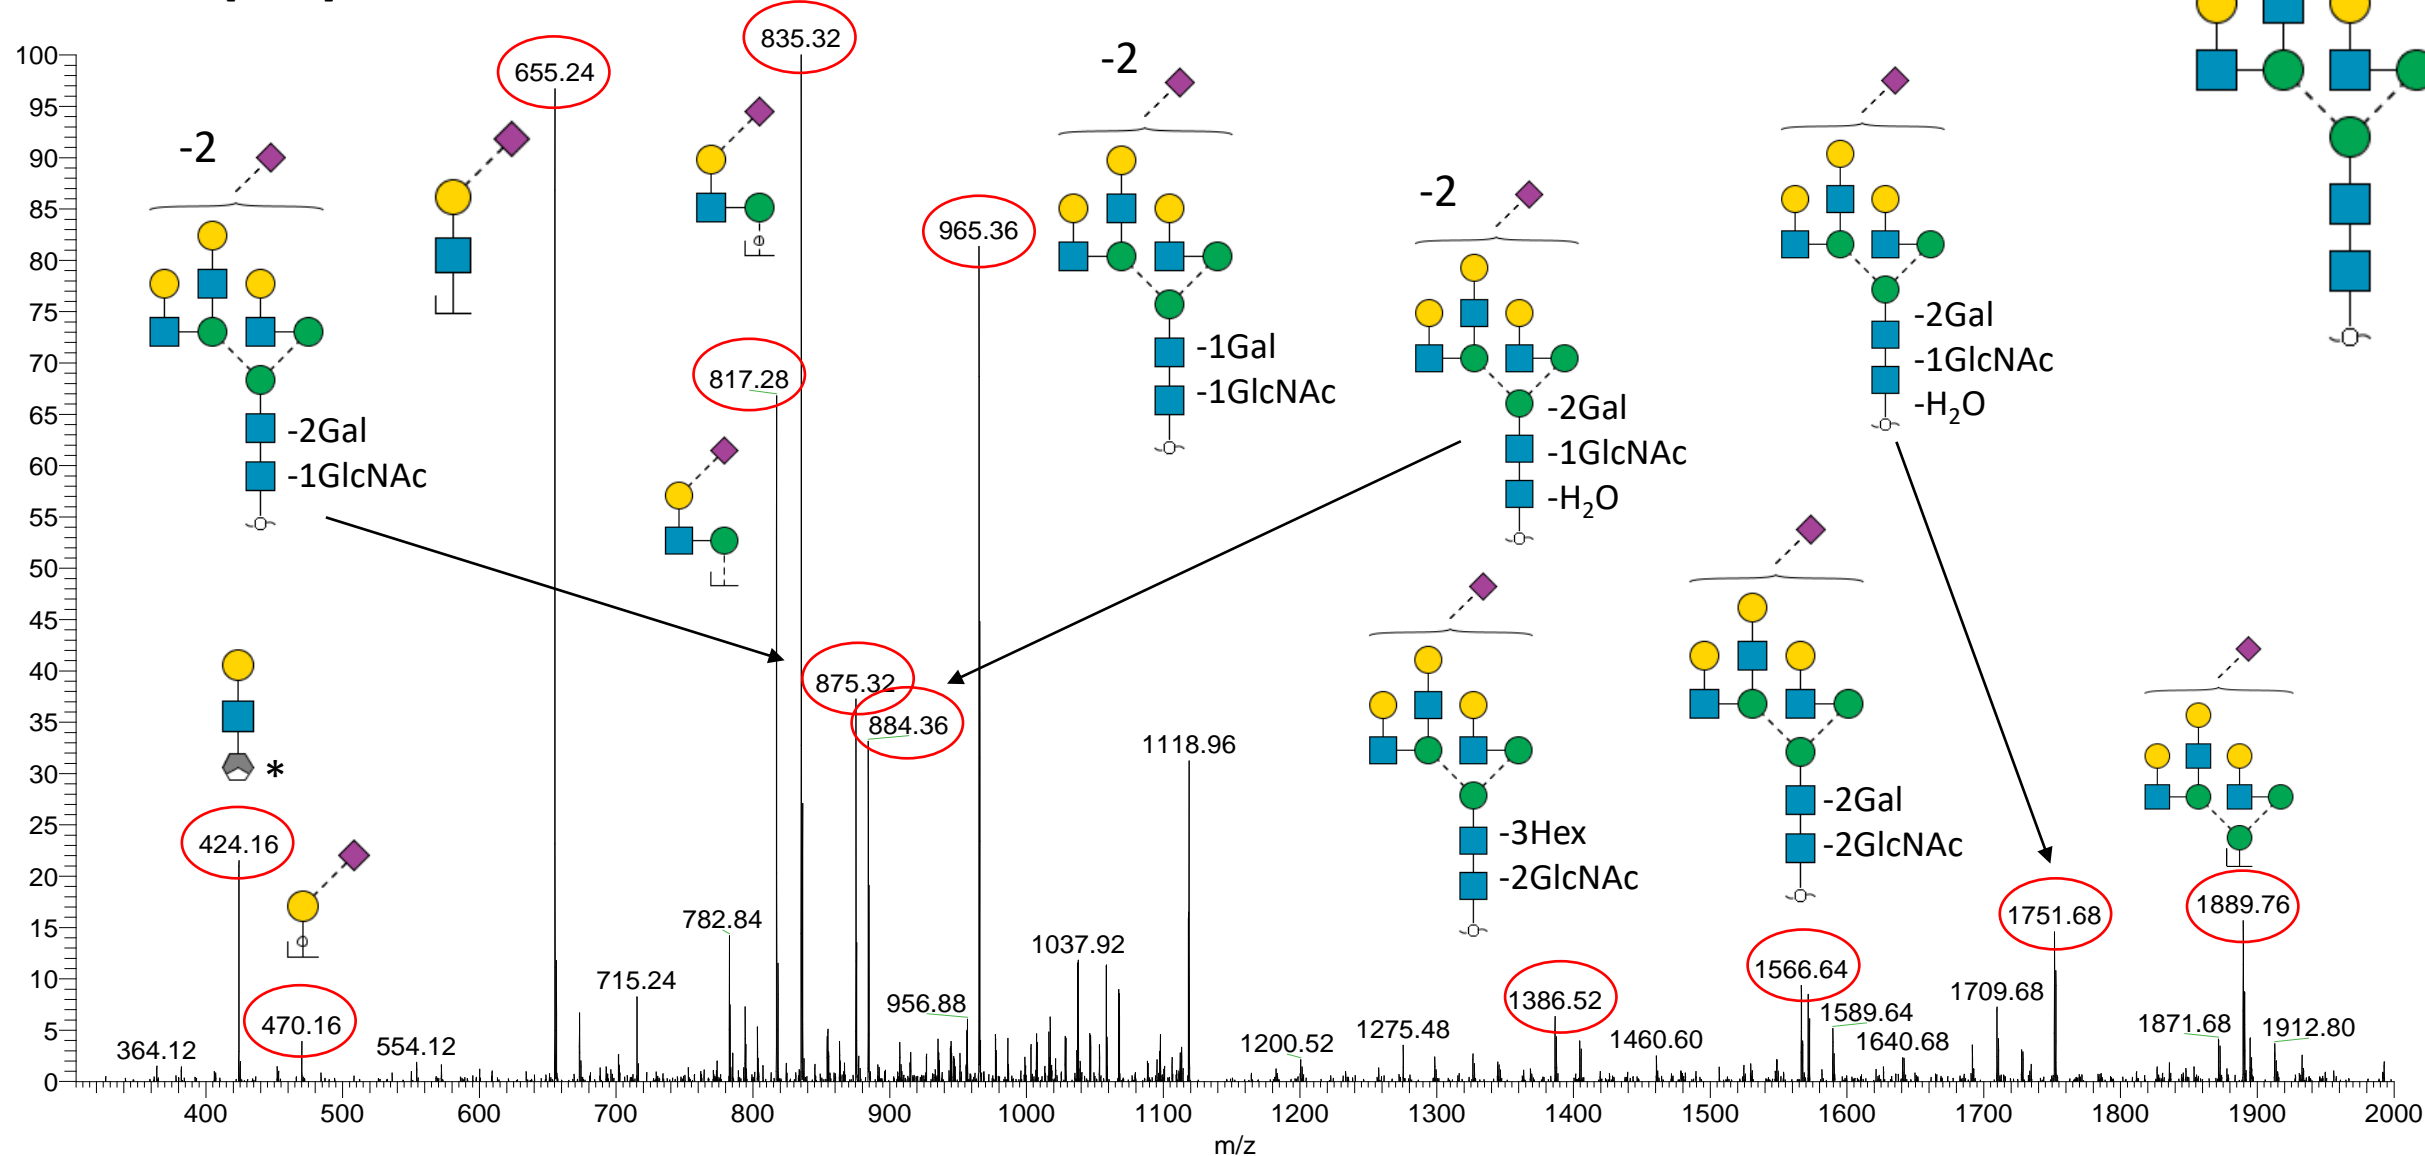

\* Ambiguity of the cross-ring fragments

Observed  $m/z$  1148.44 (2-), RT: ~33.6 min  
[M-H]<sup>-</sup> 2297.82 Da

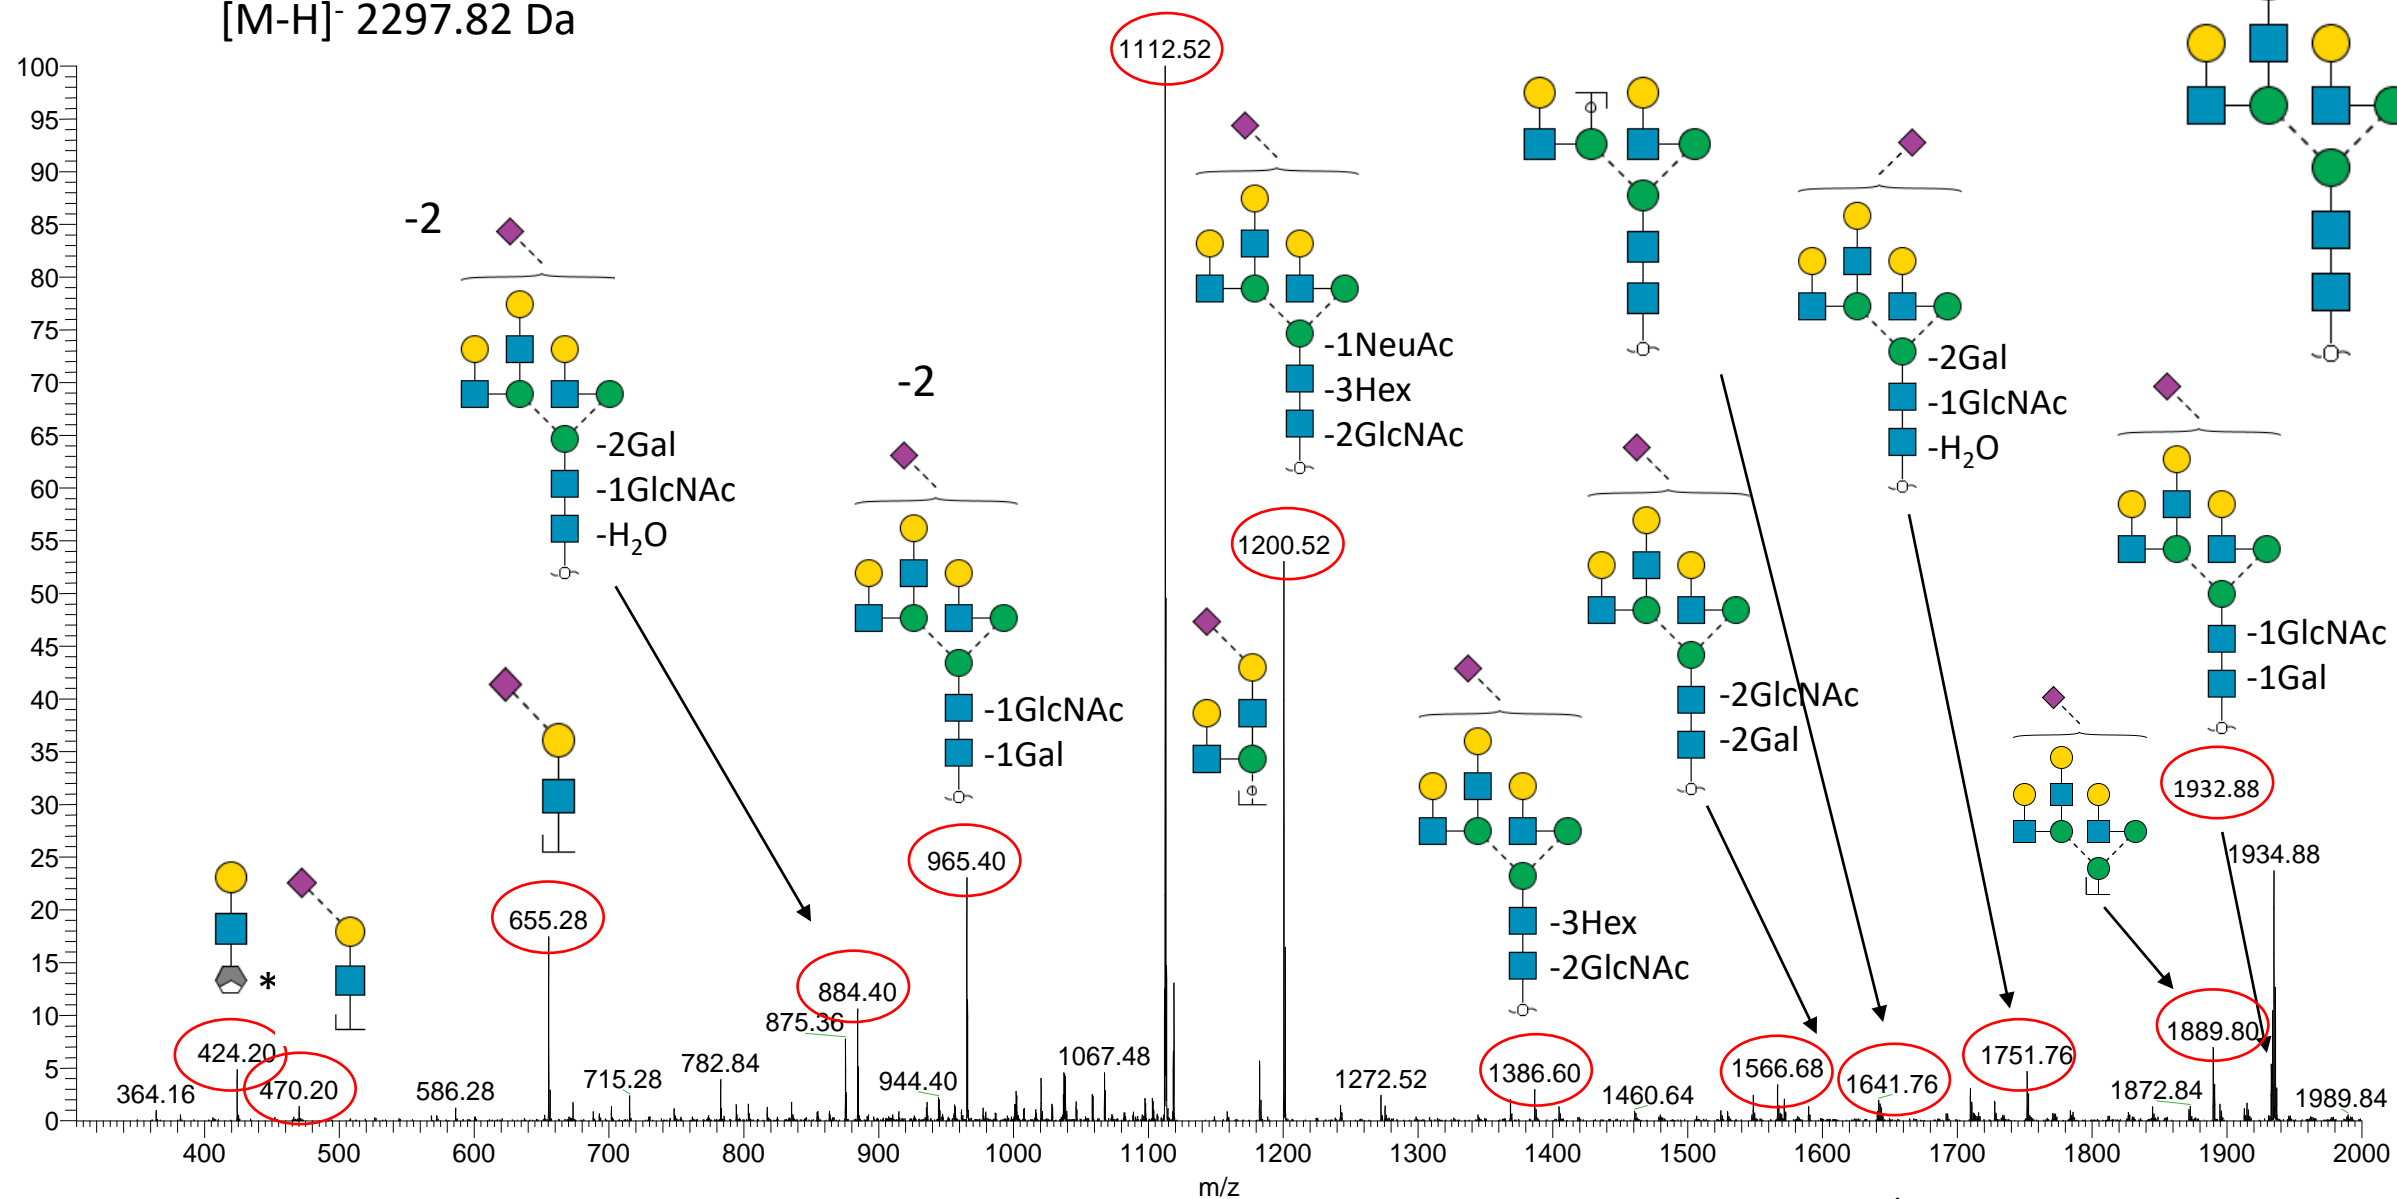

\*Ambiguity of the cross-ring fragments

Observed  $m/z$  1294.02 (2-), RT: ~36.6 min  
[M-H]<sup>-</sup> 2588.92 Da

[illegible]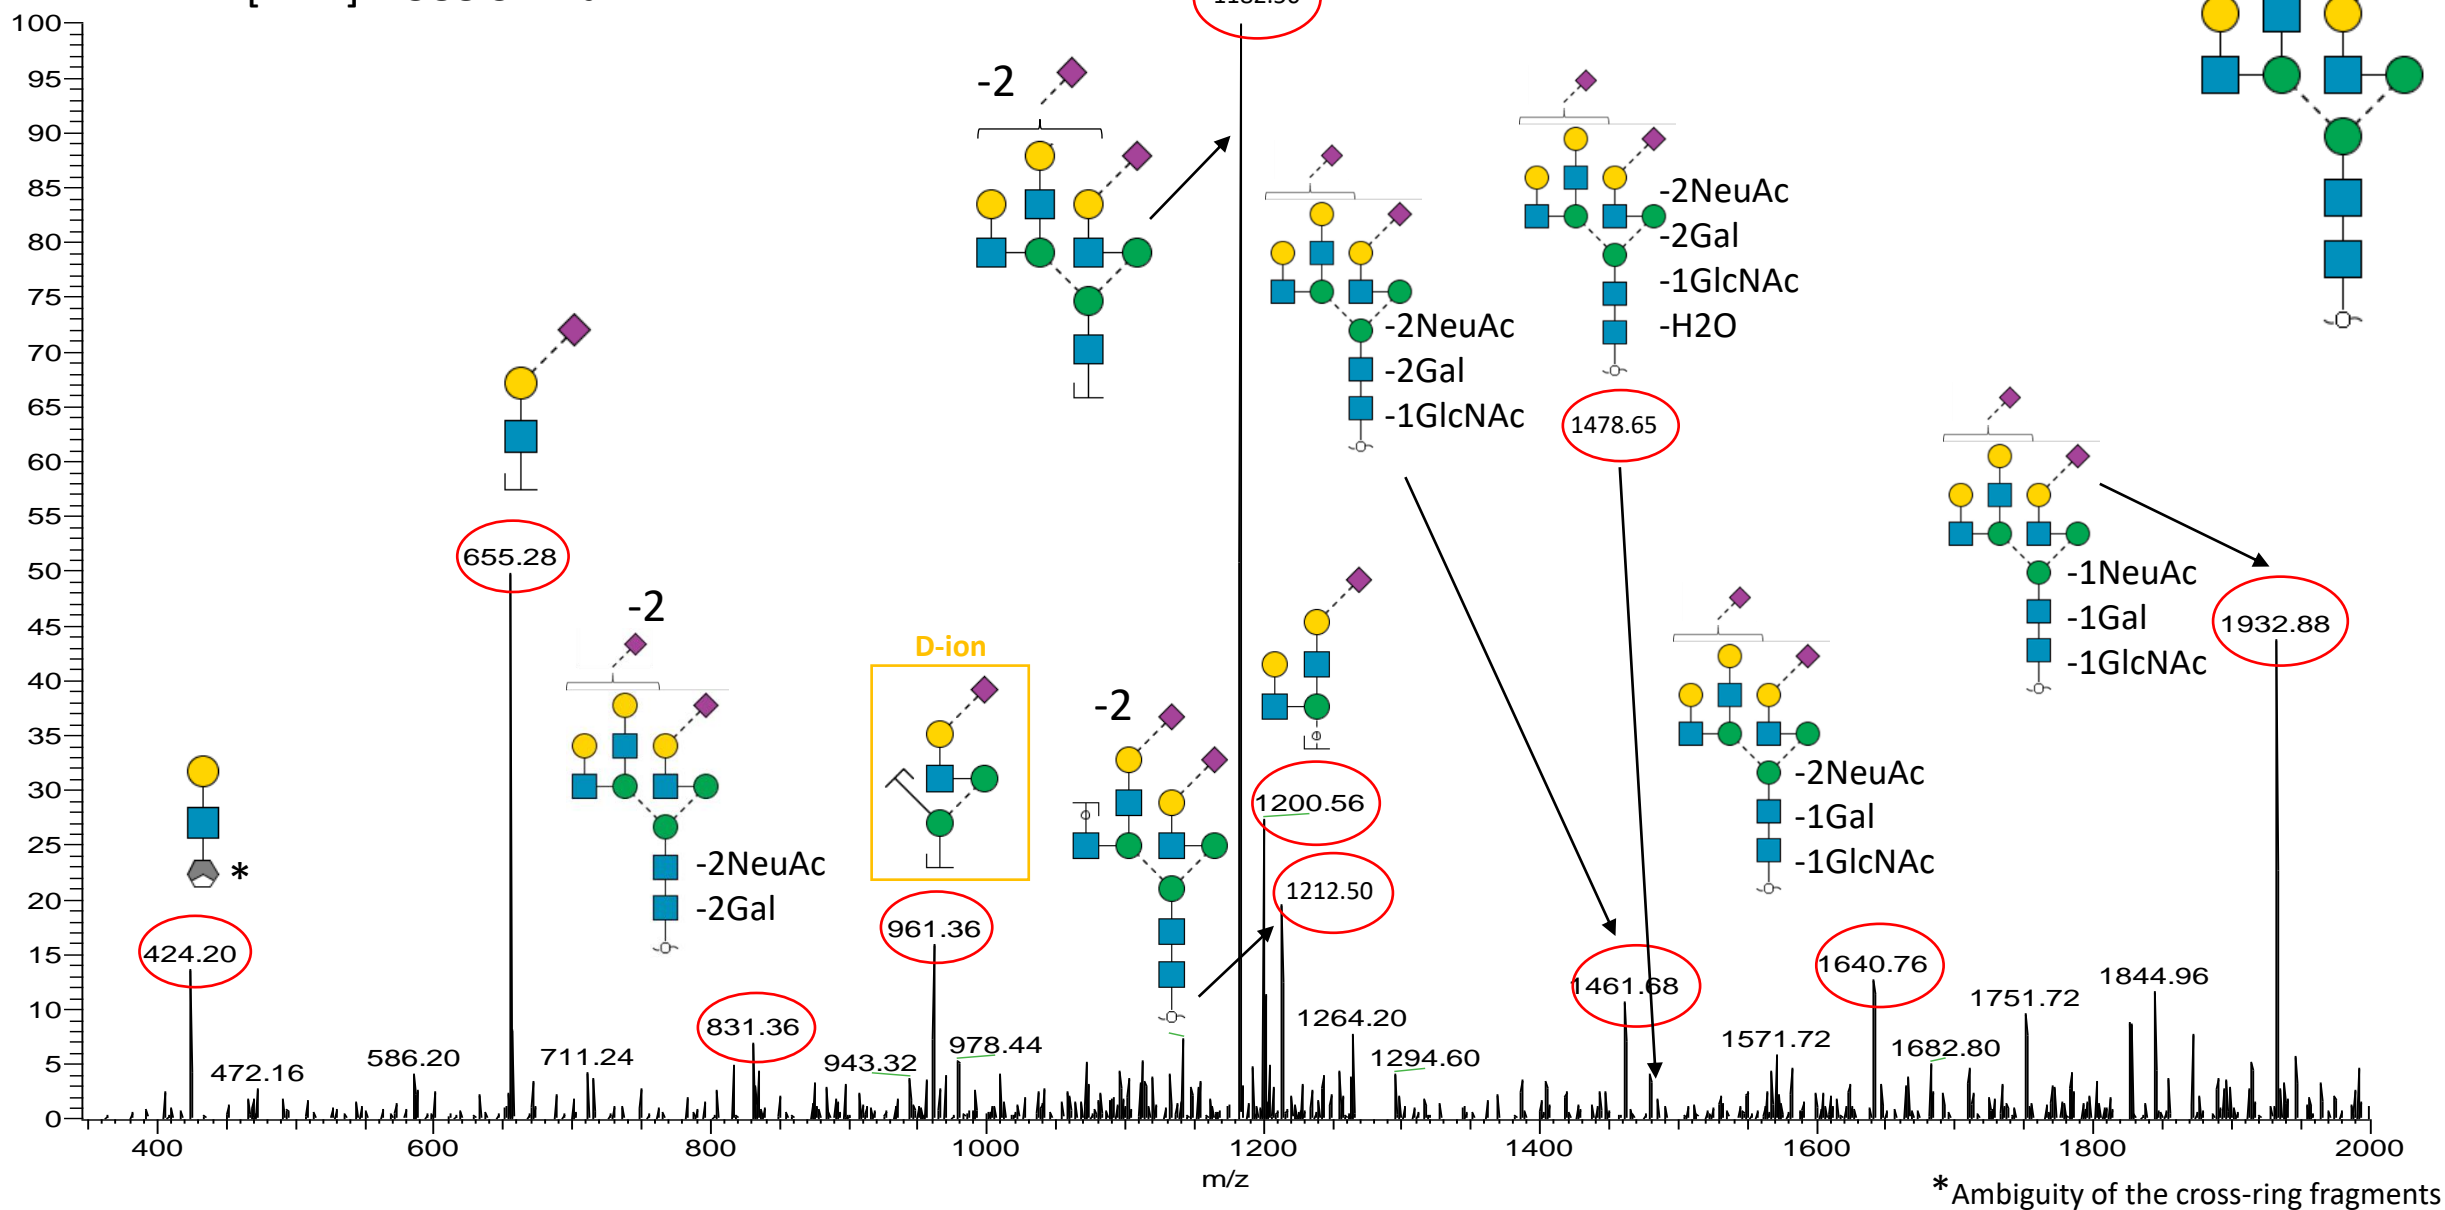



Glycan #37b

Observed  $m/z$  1294.02 (2-), RT: ~37.3 min  
[M-H]<sup>-</sup> 2588.92 Da

Note: Based on PGC-LC elution pattern, this glycan is annotated as the  $\alpha$ 2,6- $\alpha$ 2,3-sialyl linkage isomer, one on the 6-arm and the other on 3-arm.

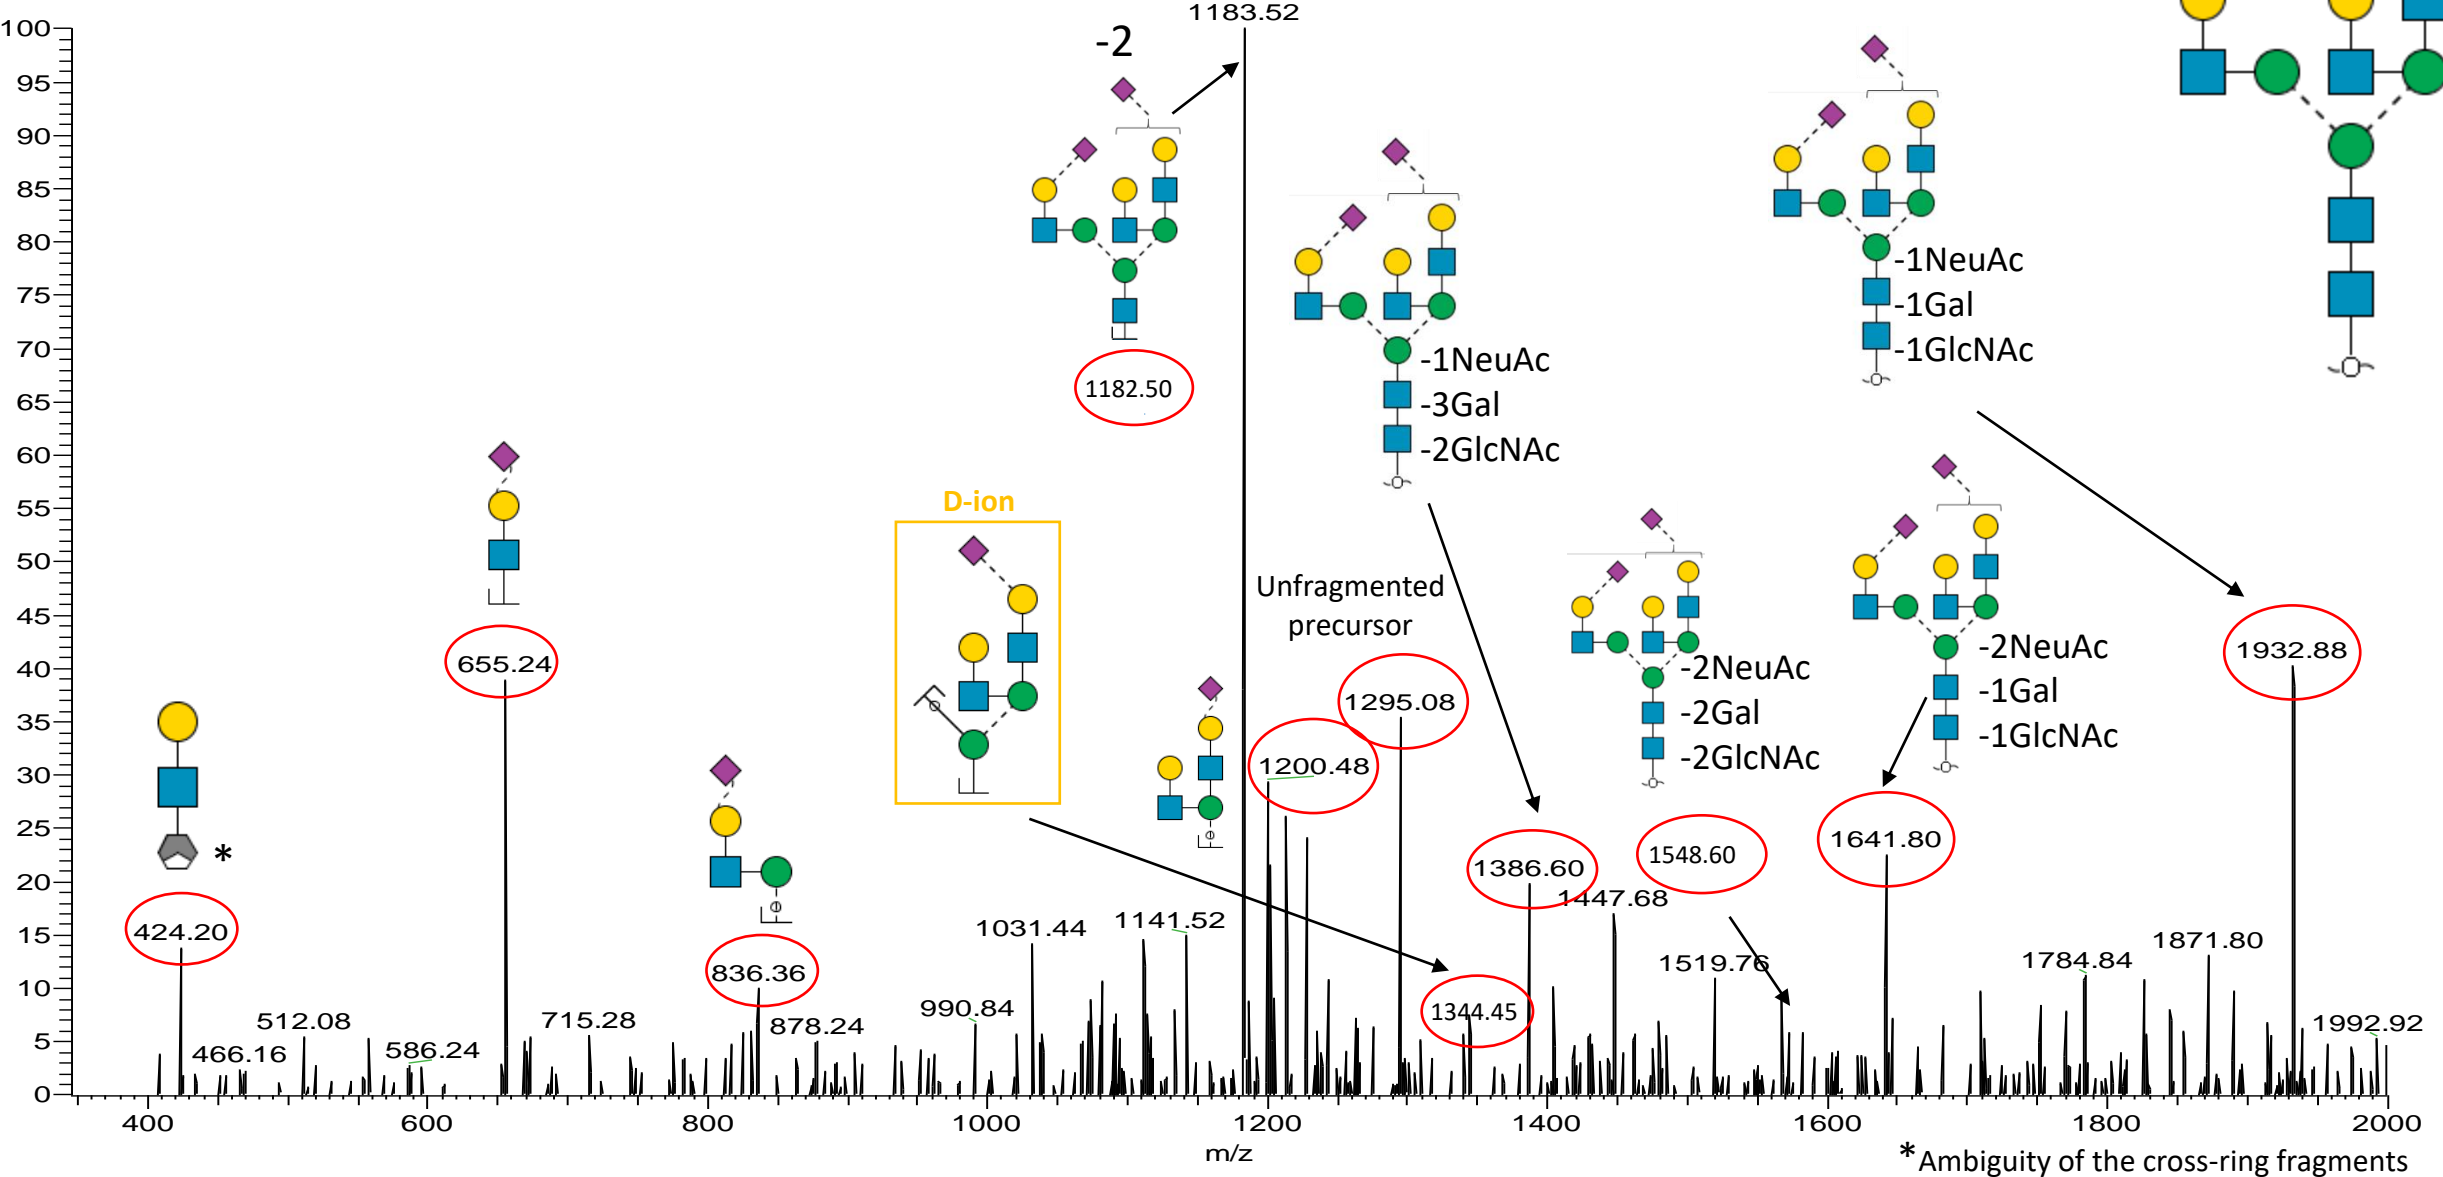

Glycan #37c

Observed  $m/z$  1294.02 (2-), RT: ~42.1 min  
[M-H]<sup>-</sup> 2588.92 Da

Note: Based on PGC-LC elution pattern, this glycan is annotated as the  $\alpha 2,3$ - $\alpha 2,3$ -sialyl linkage isomer, one on the 6-arm and the other on 3-arm.

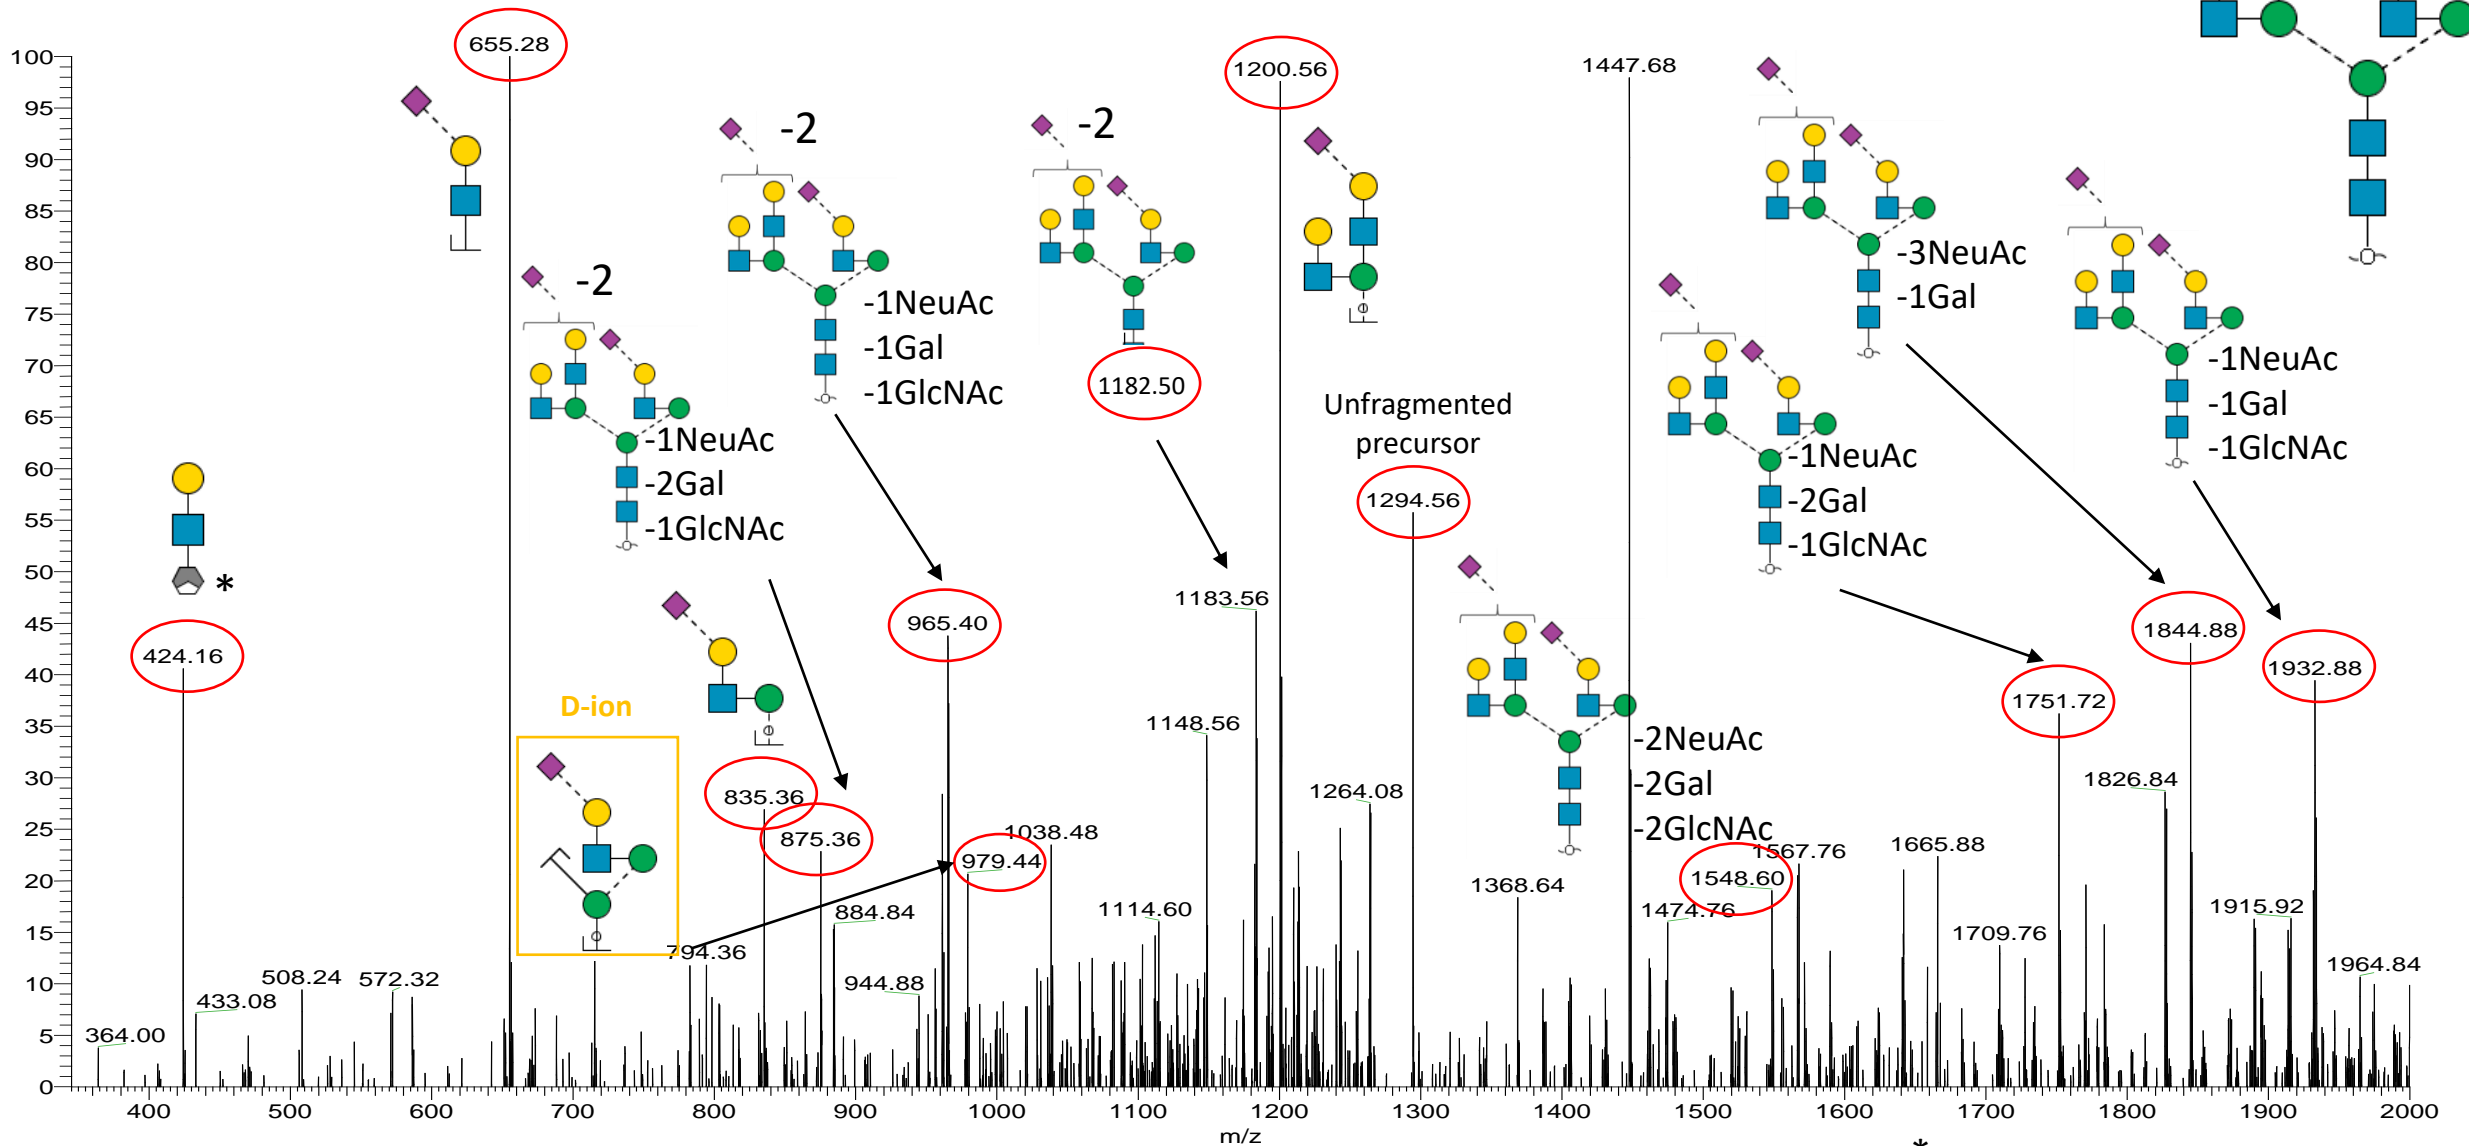

\* Ambiguity of the cross-ring fragments

Glycan #37d

Observed  $m/z$  1294.02 (2-), RT: ~43.1 min  
[M-H]<sup>-</sup> 2588.92 Da

Note: Based on PGC-LC elution pattern, this glycan is annotated as the  $\alpha$ 2,3- $\alpha$ 2,3-sialyl linkage isomer, one on the 6-arm and the other on 3-arm.

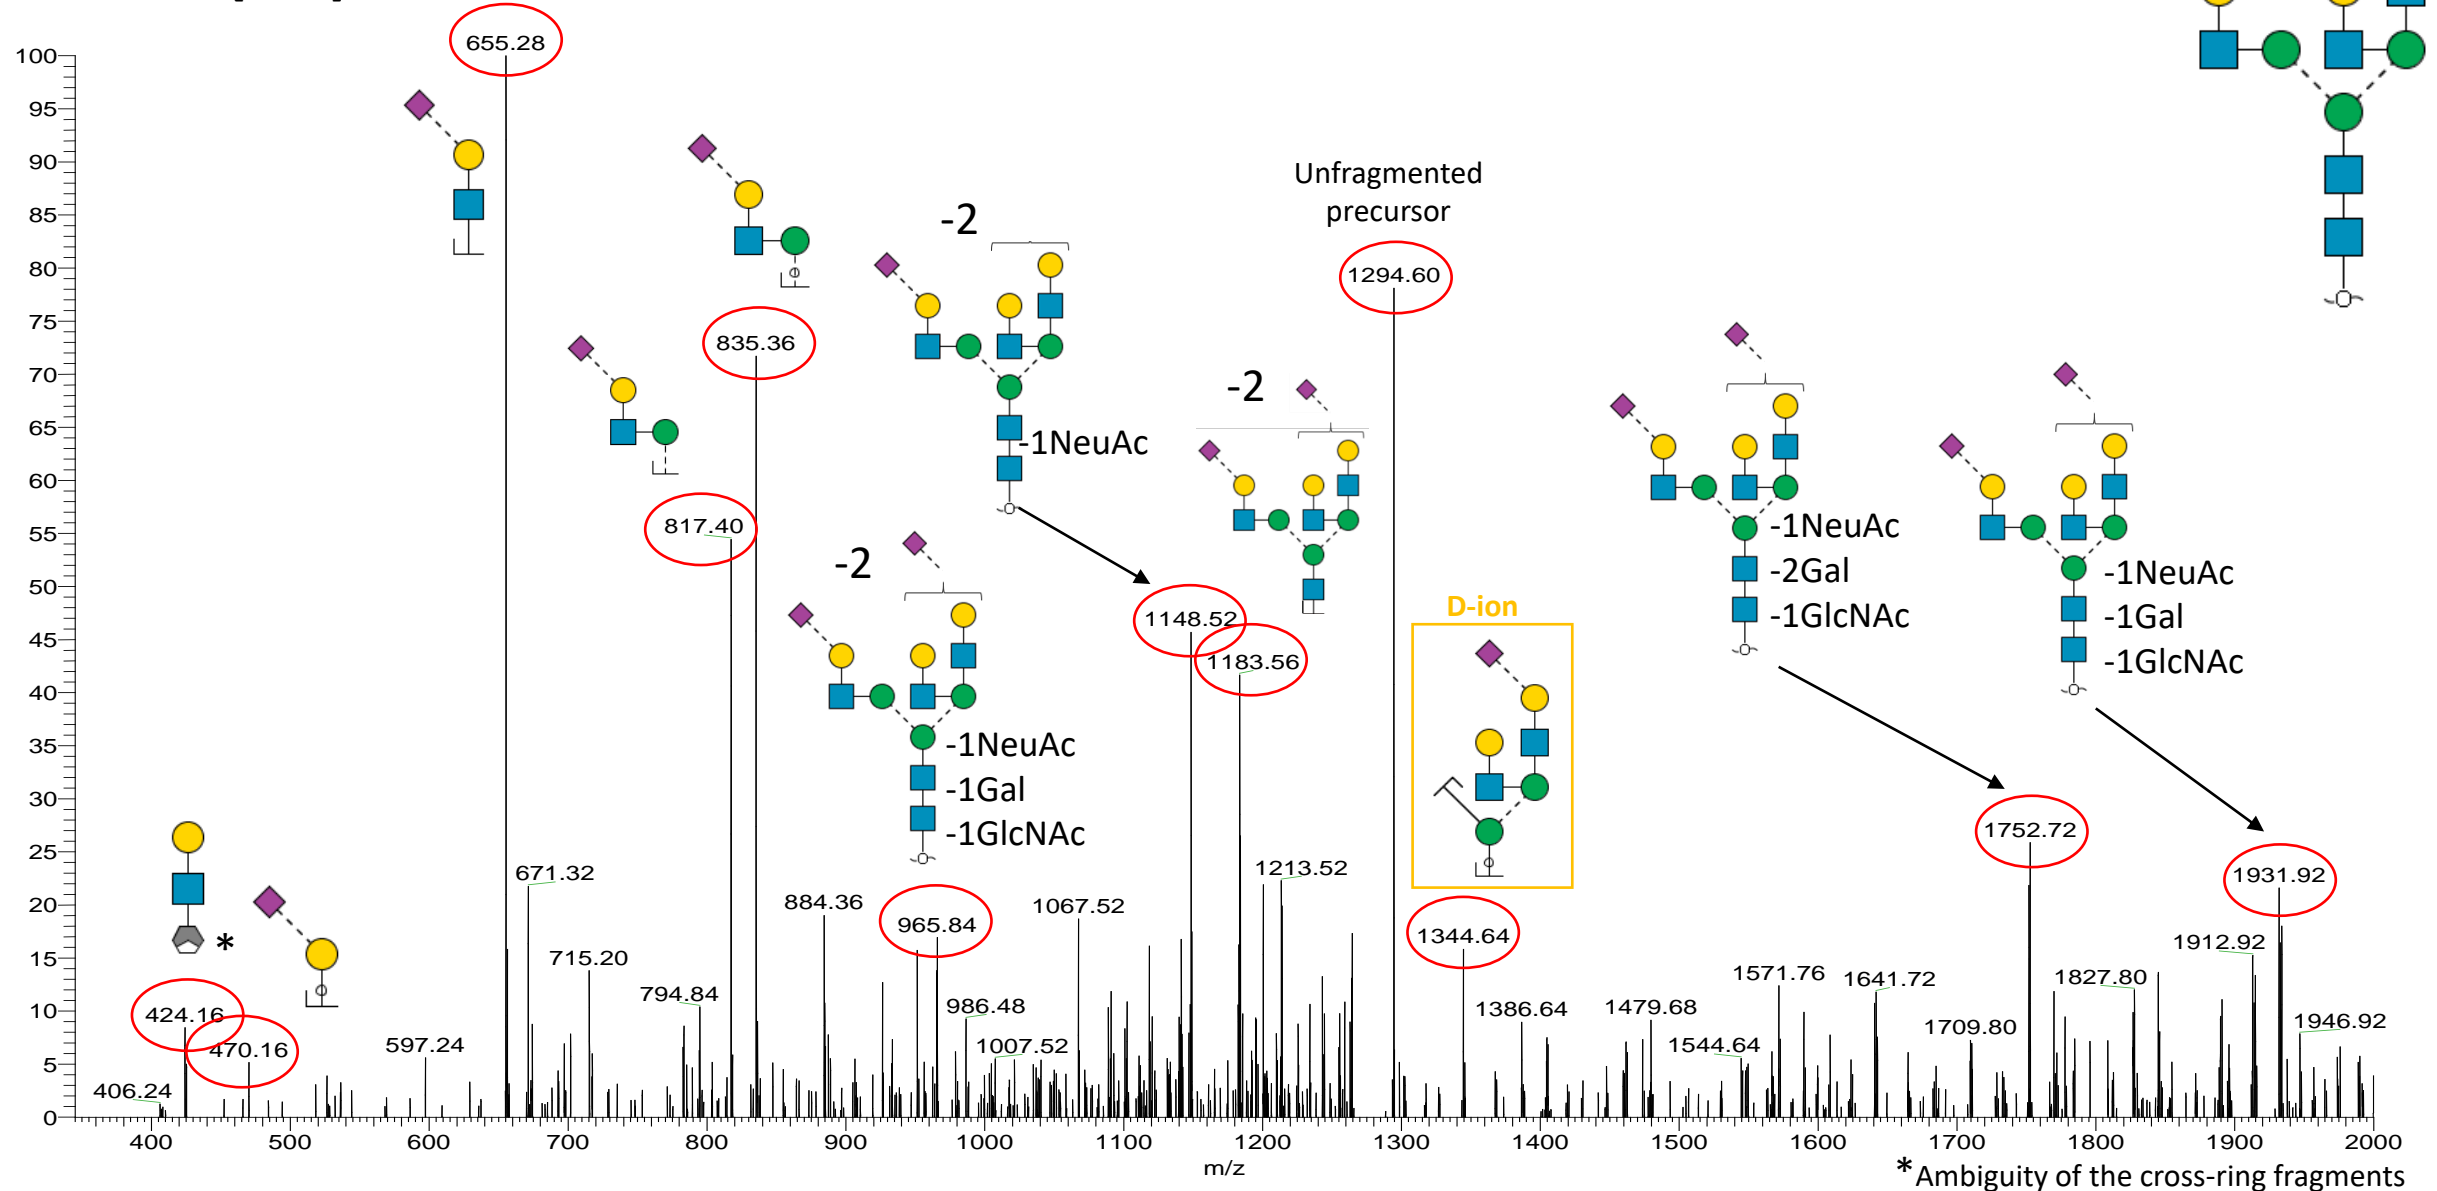

Glycan #38a

Observed  $m/z$  1367.06 (2-), RT: ~31.7 min  
[M-H]<sup>-</sup> 2734.98 Da

Note: Based on PGC-LC elution pattern, this glycan is annotated as the  $\alpha$ 2,6- $\alpha$ 2,6-sialyl linkage isomer but the exact position cannot be determined. Antenna fucose position and linkage also cannot be determined.

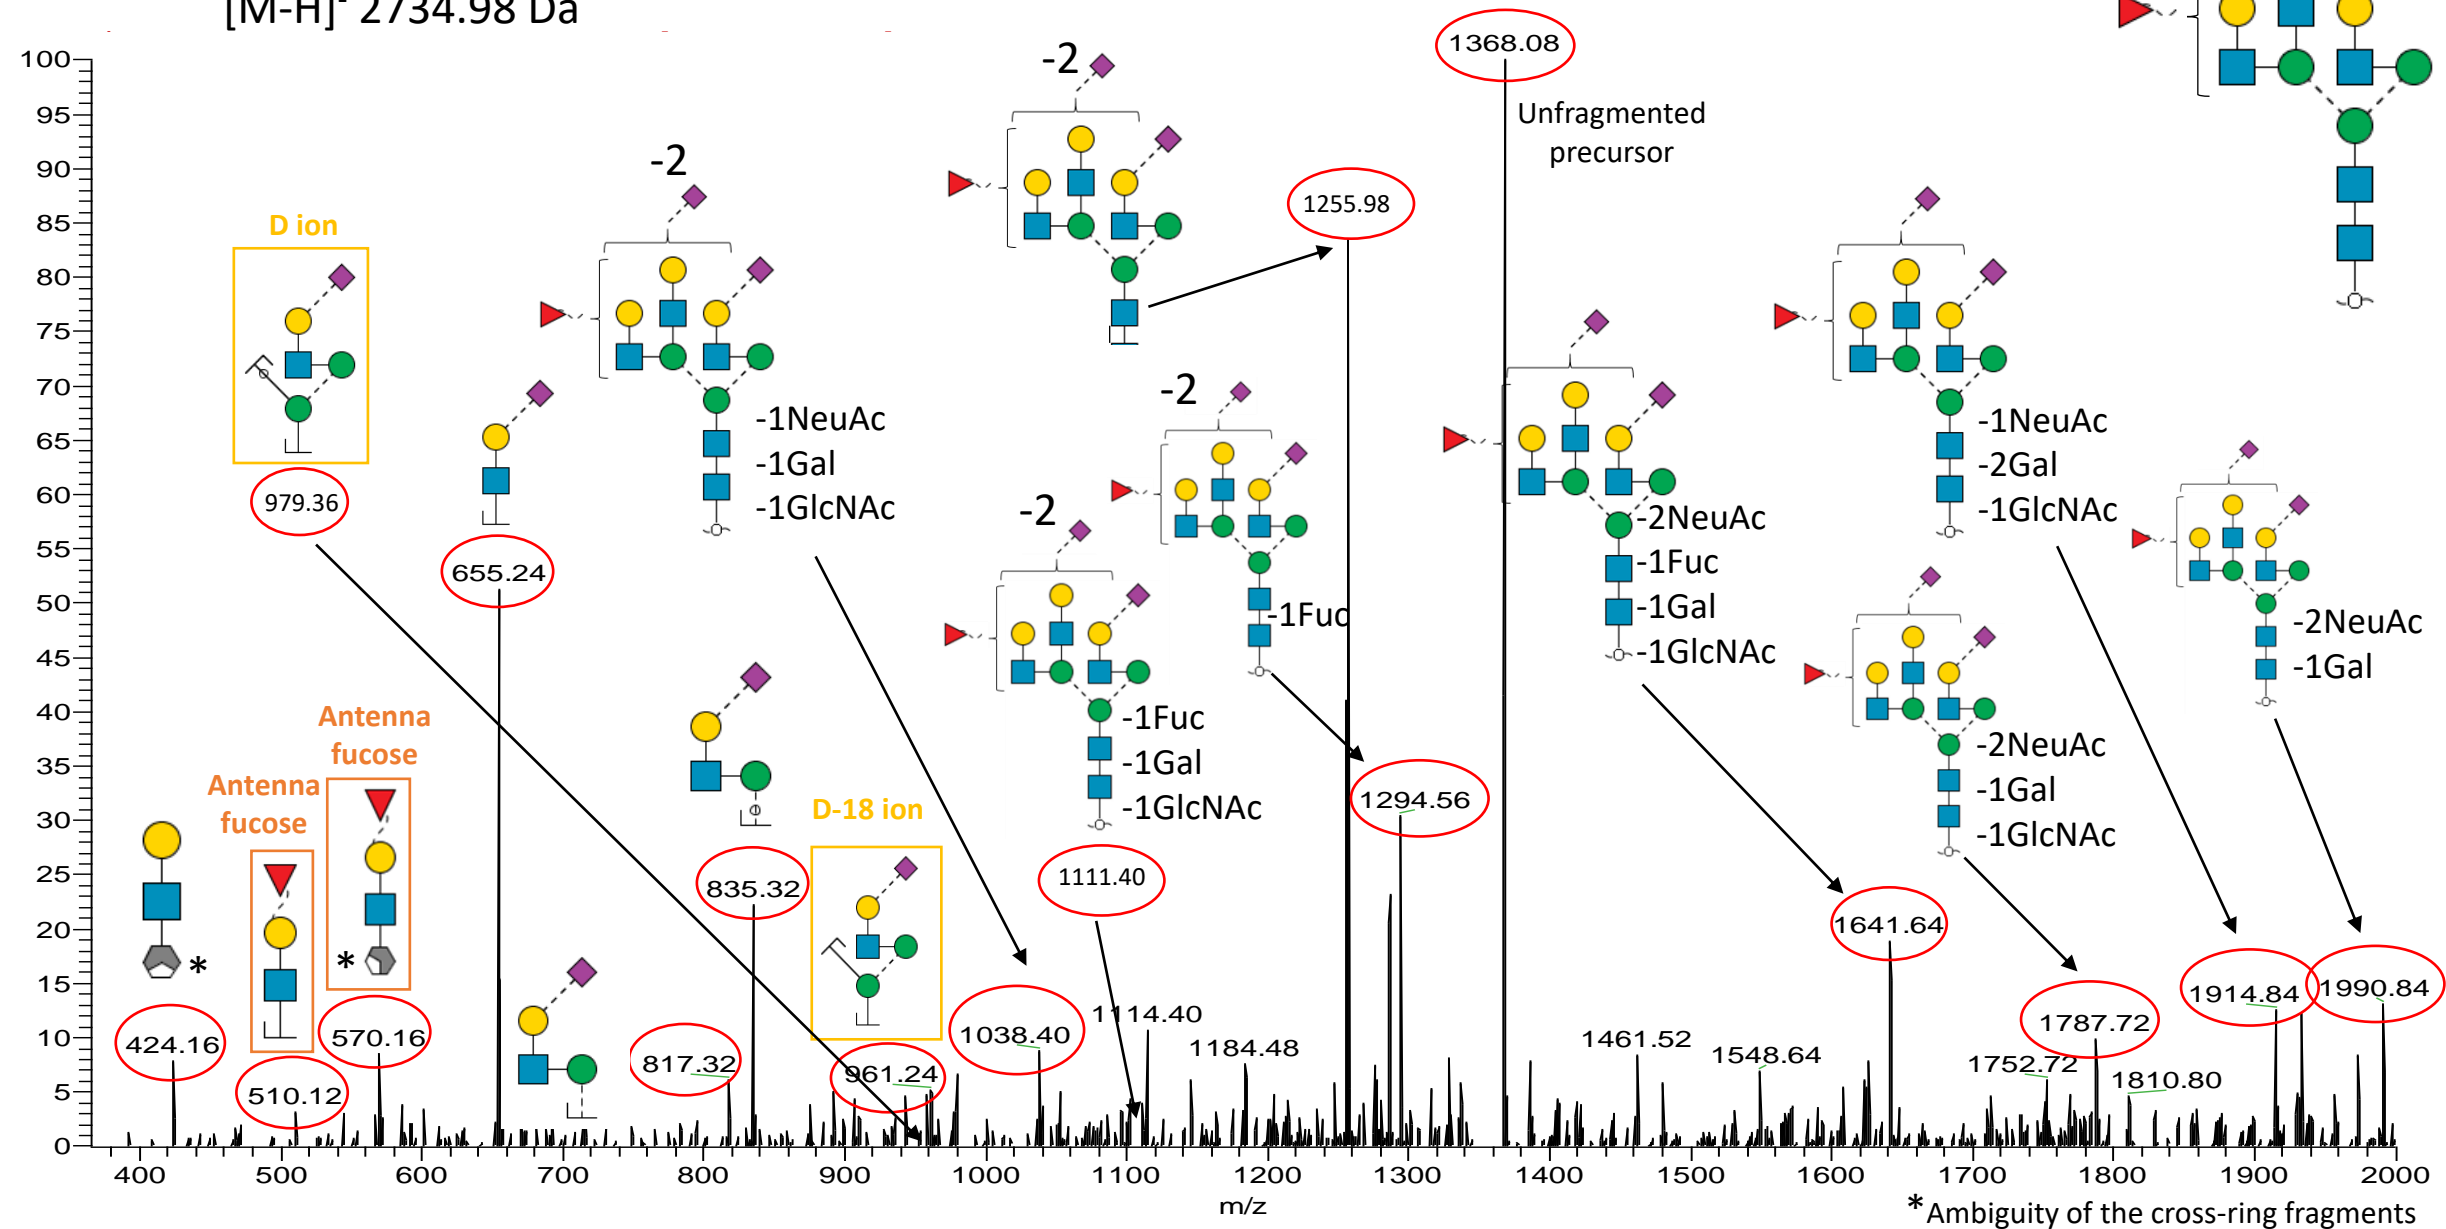

# Glycan #38b

Observed  $m/z$  1367.06 (2-), RT: ~33.8 min  
[M-H]<sup>-</sup> 2734.98 Da

Note: Based on PGC-LC elution pattern, this glycan is annotated as the  $\alpha$ 2,6- $\alpha$ 2,3-sialyl linkage isomer but the exact position cannot be determined. Antenna fucose position and linkage also cannot be determined.

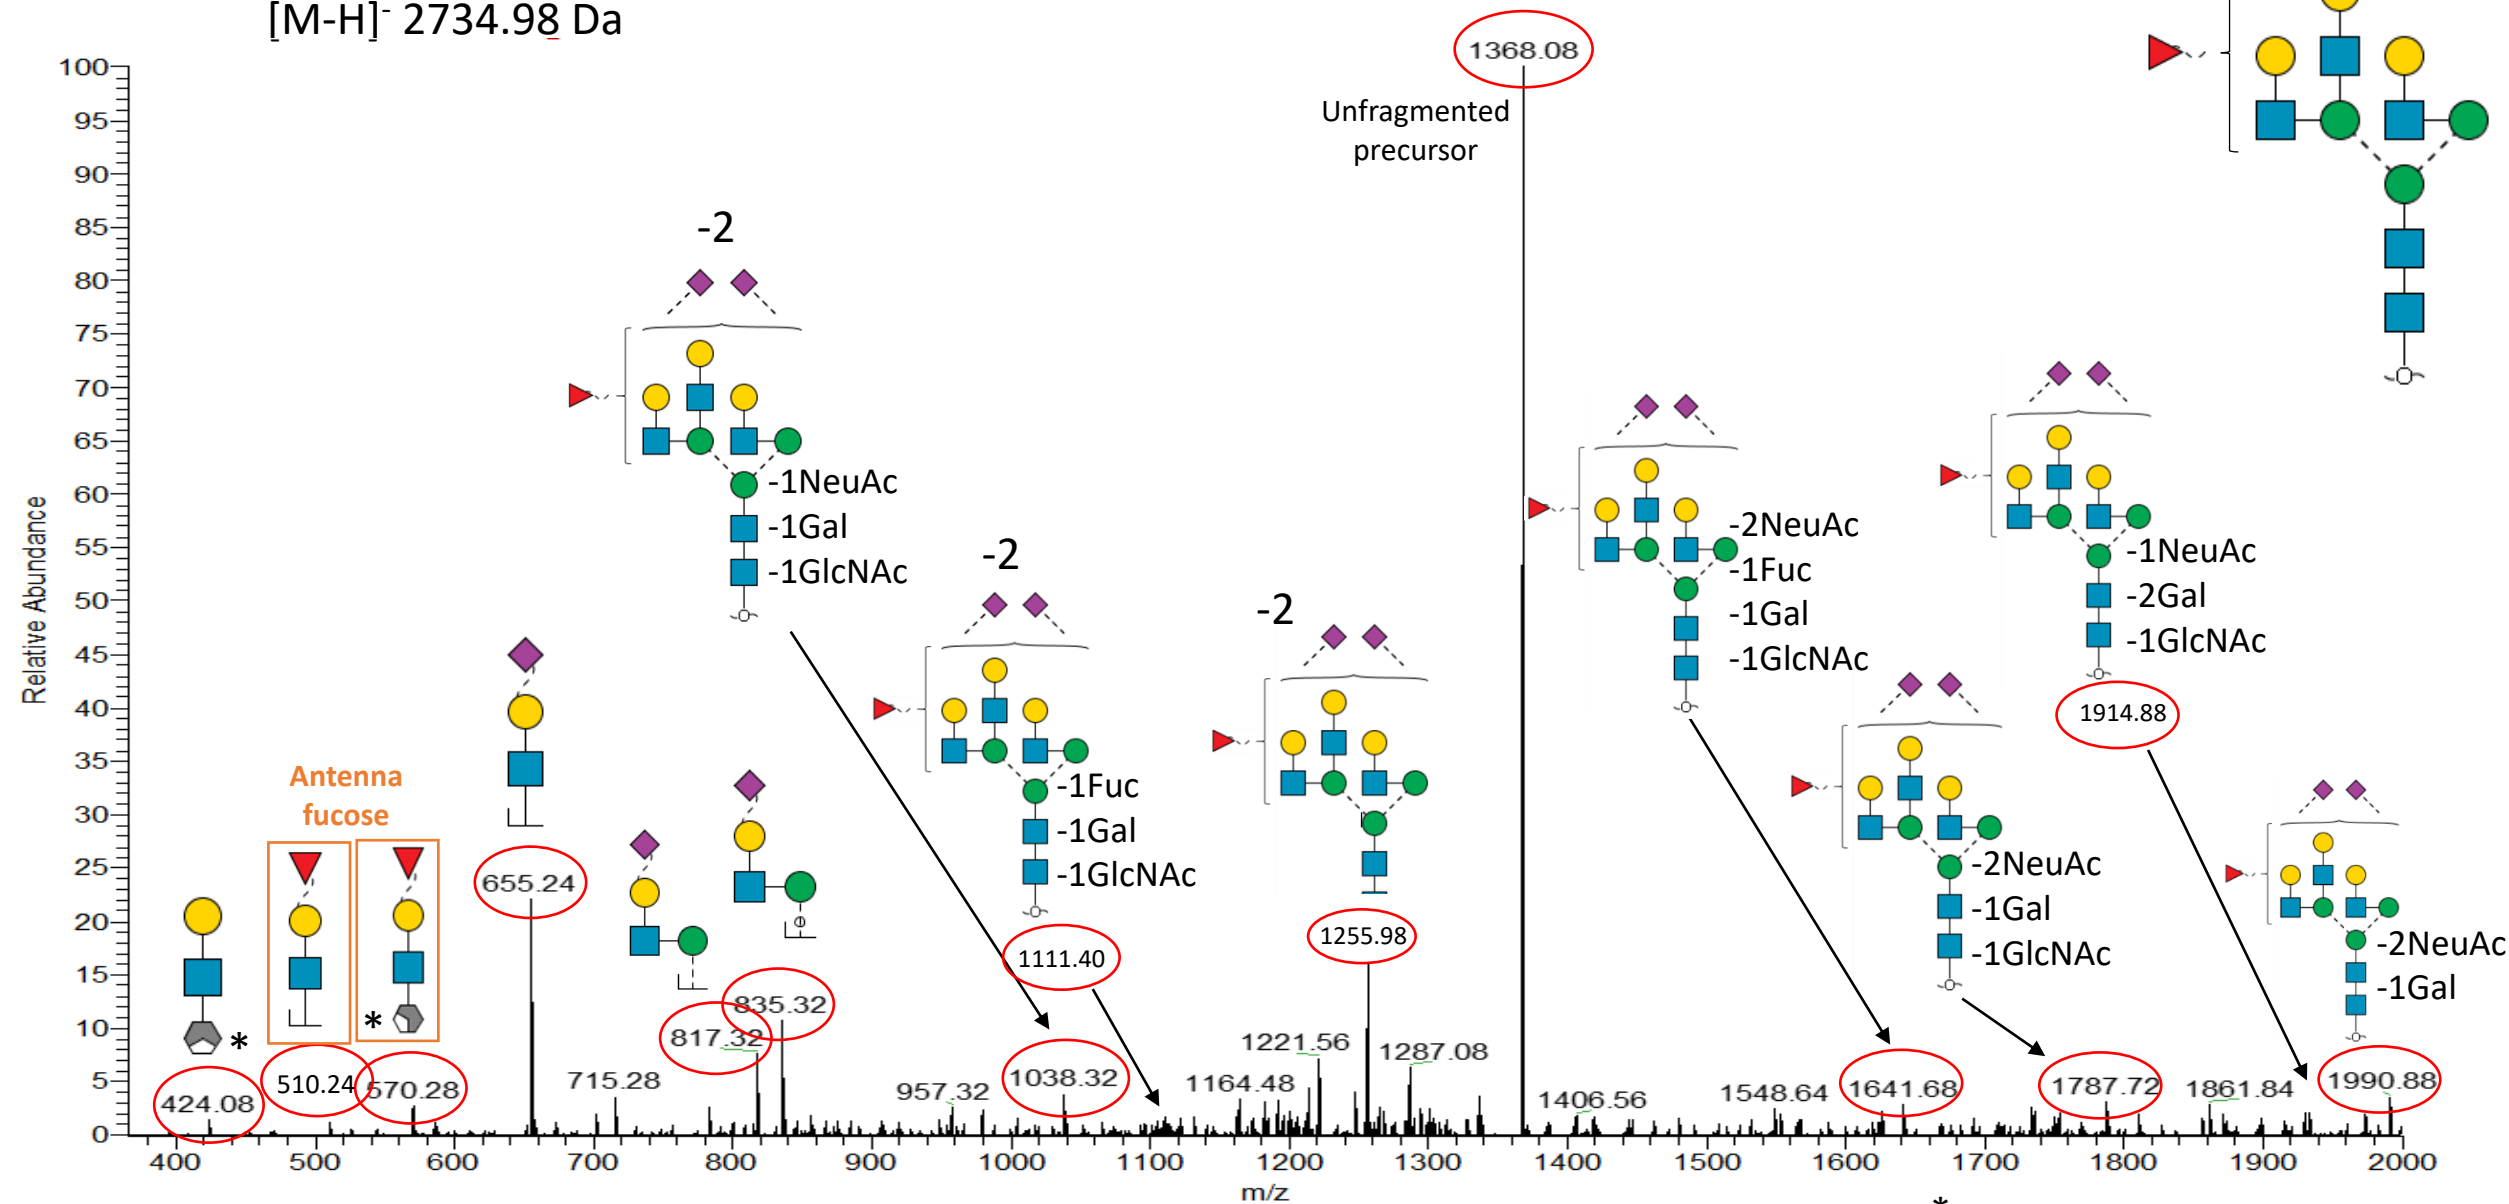

\* Ambiguity of the cross-ring fragments

Glycan #39a

Observed  $m/z$  1439.56 (2-), RT: ~37.5 min  
[M-H]<sup>-</sup> 2880.00 Da

Note: Based on PGC-LC elution pattern, this glycan is annotated as the  $\alpha$ 2,6- $\alpha$ 2,6- $\alpha$ 2,6-sialyl linkage isomer but the exact antennary branching cannot be determined.

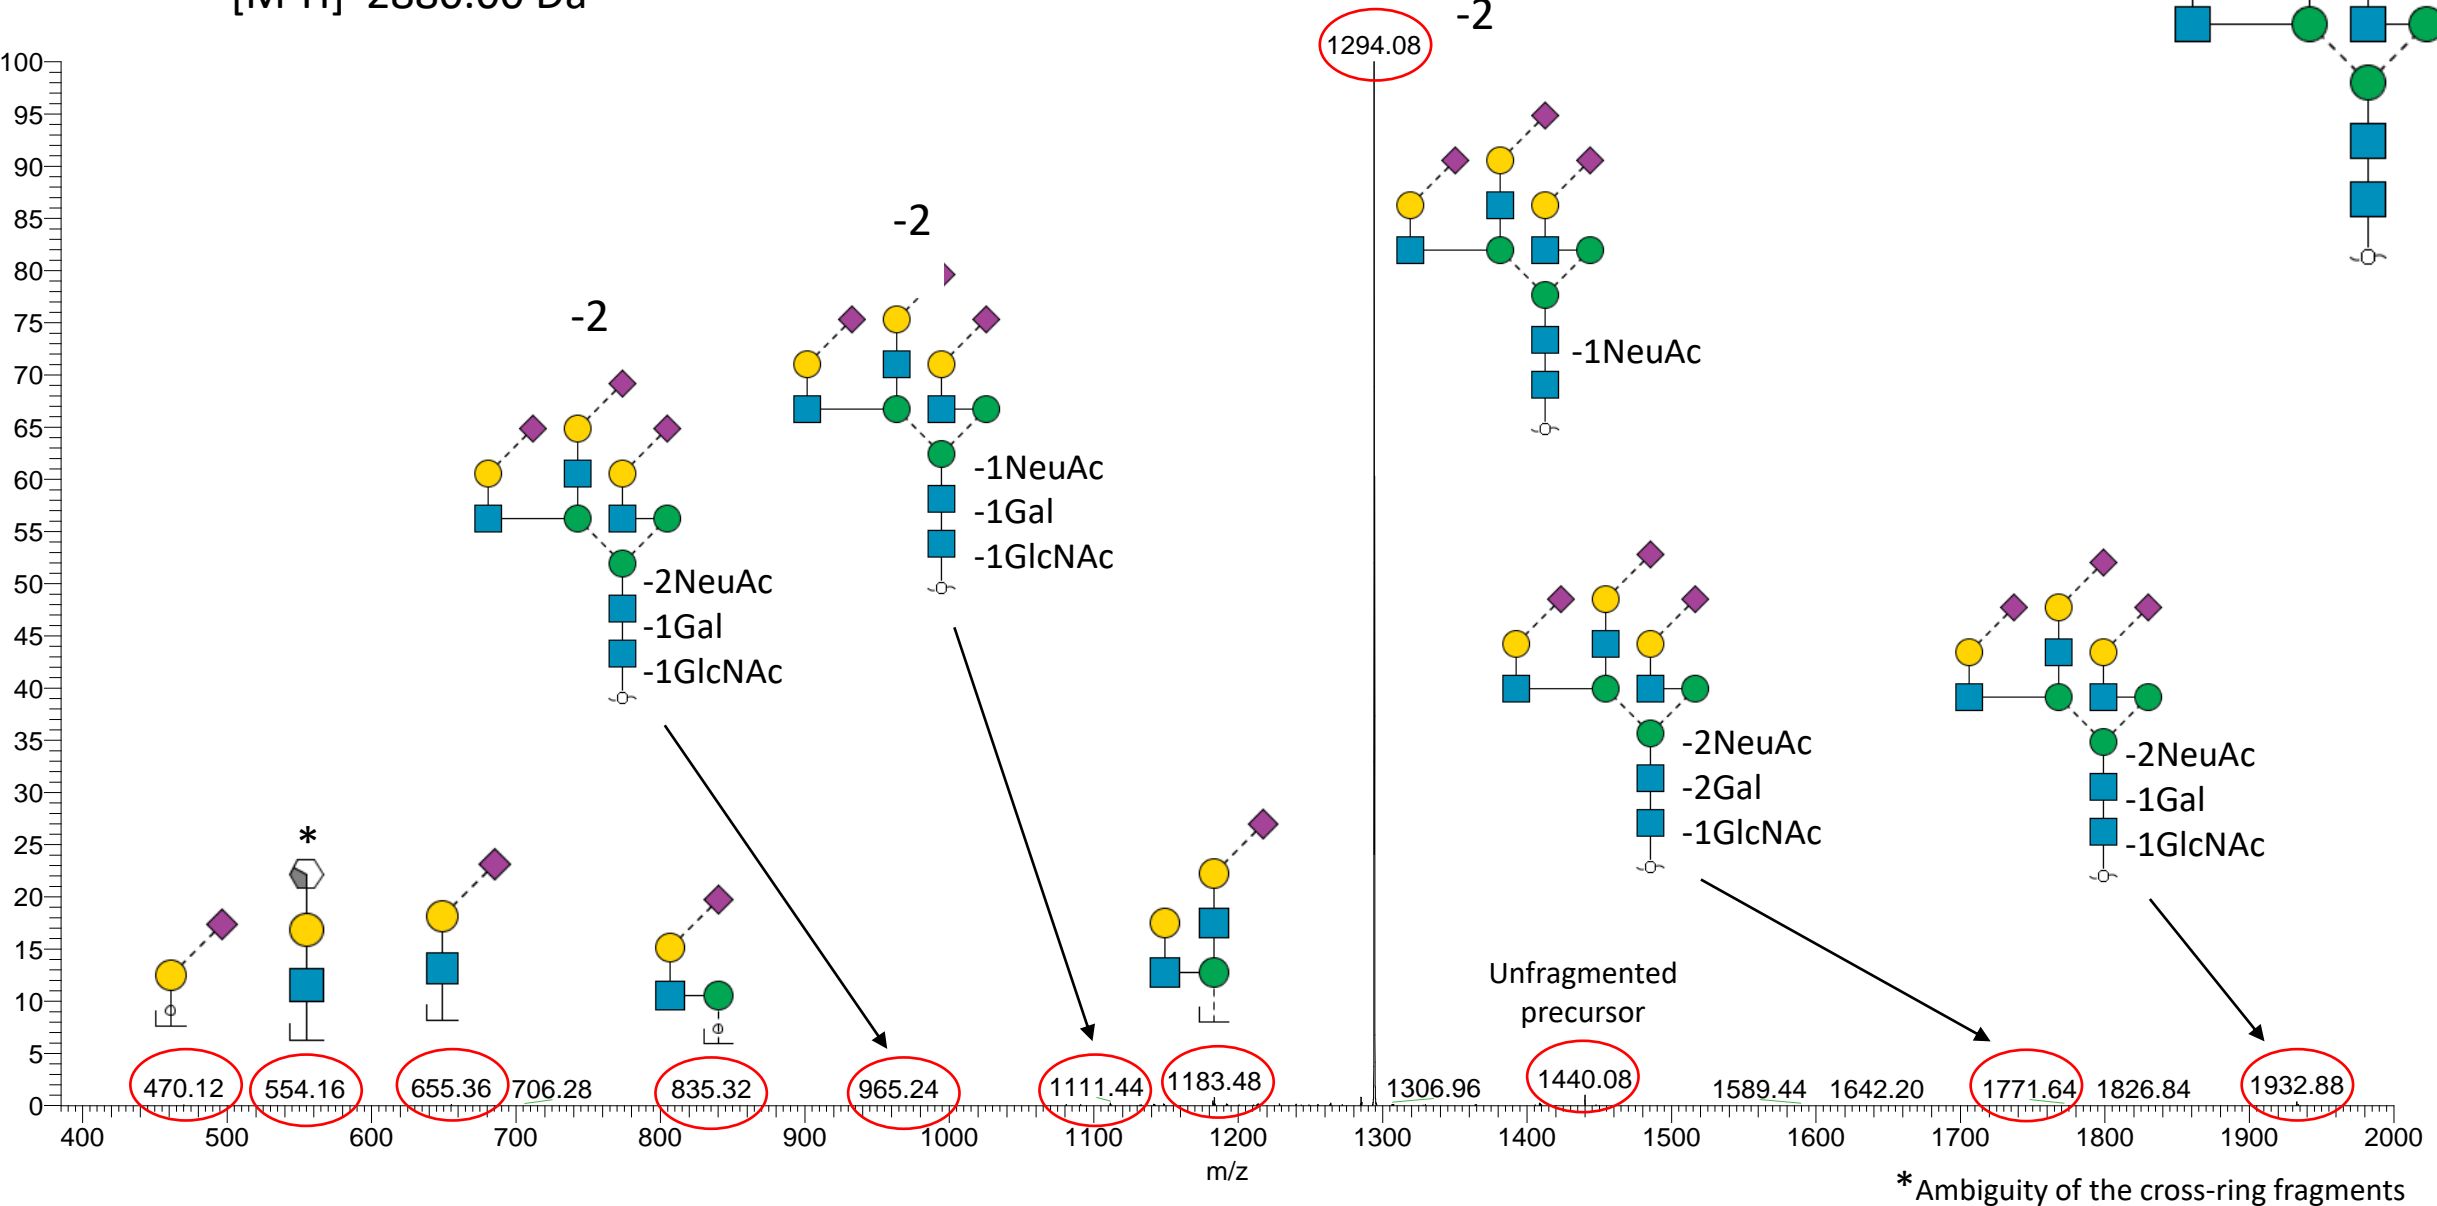

Glycan #39b

Observed  $m/z$  1439.56 (2-), RT: ~41.2 min  
[M-H]<sup>-</sup> 2880.00 Da

Note: Based on PGC-LC elution pattern, this glycan is annotated as the  $\alpha$ 2,6- $\alpha$ 2,6- $\alpha$ 2,3-sialyl linkage isomer but the exact position and the antennary branching cannot be determined.

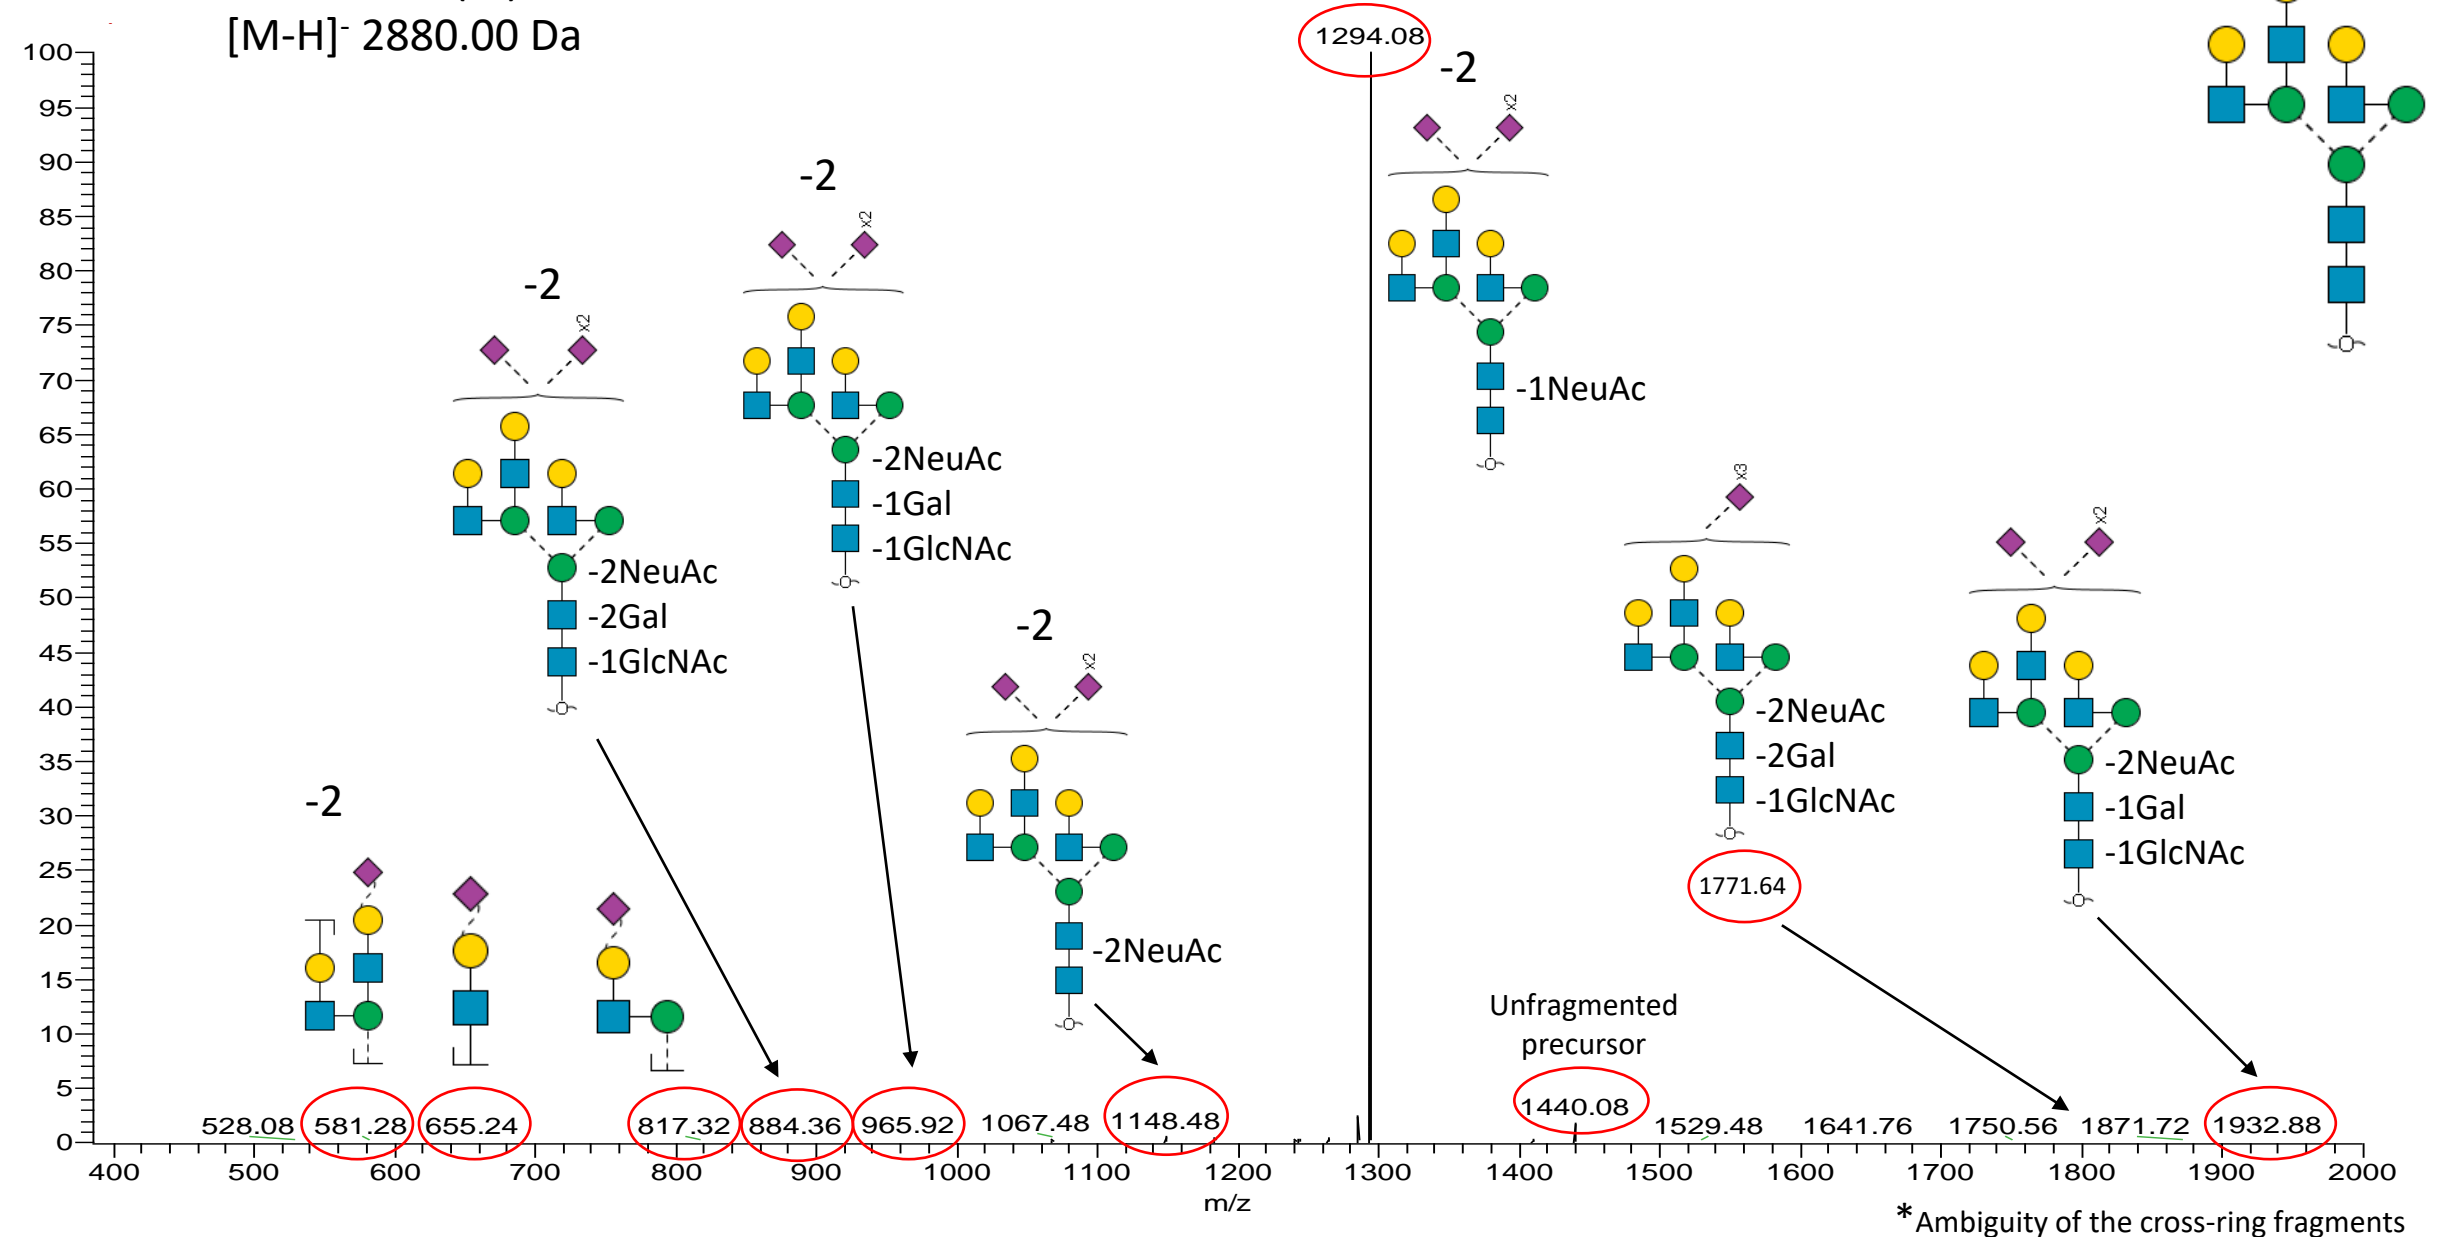

Observed  $m/z$  1439.56 (2-), RT: ~45.8 min  
[M-H]<sup>-</sup> 2880.00 Da

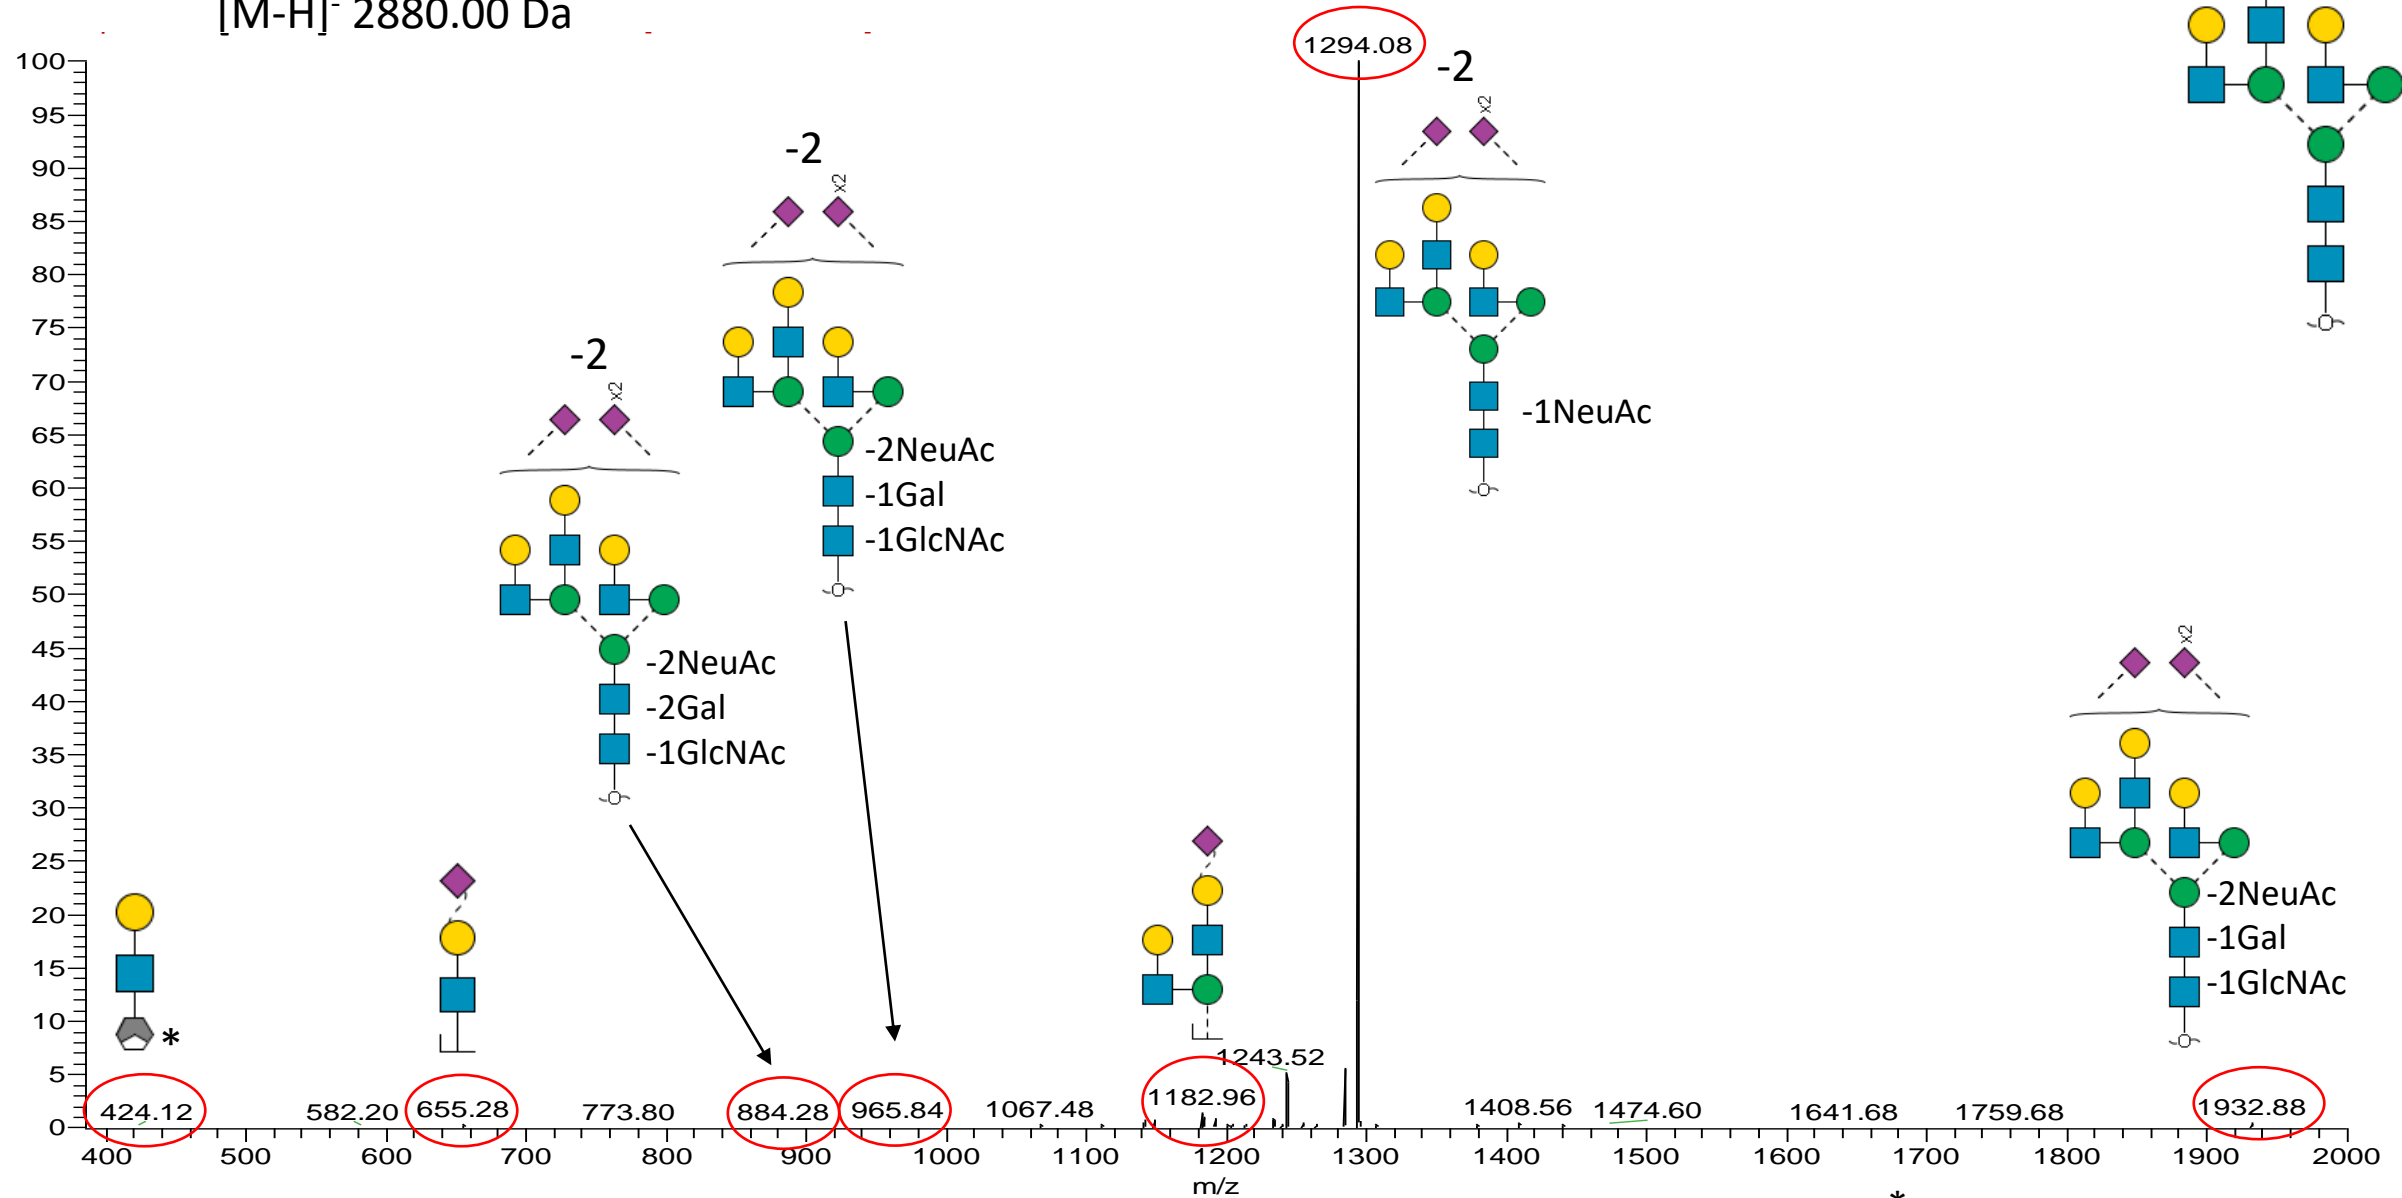

\*Ambiguity of the cross-ring fragments



Glycan #39d

Observed  $m/z$  1439.50 (2-), RT: ~49.7 min  
[M-H]<sup>-</sup> 2880.00 Da

Note: Based on PGC-LC elution pattern, this glycan is annotated as the  $\alpha 2,3$ - $\alpha 2,3$ -sialyl linkage isomer but the antennary branching cannot be determined.

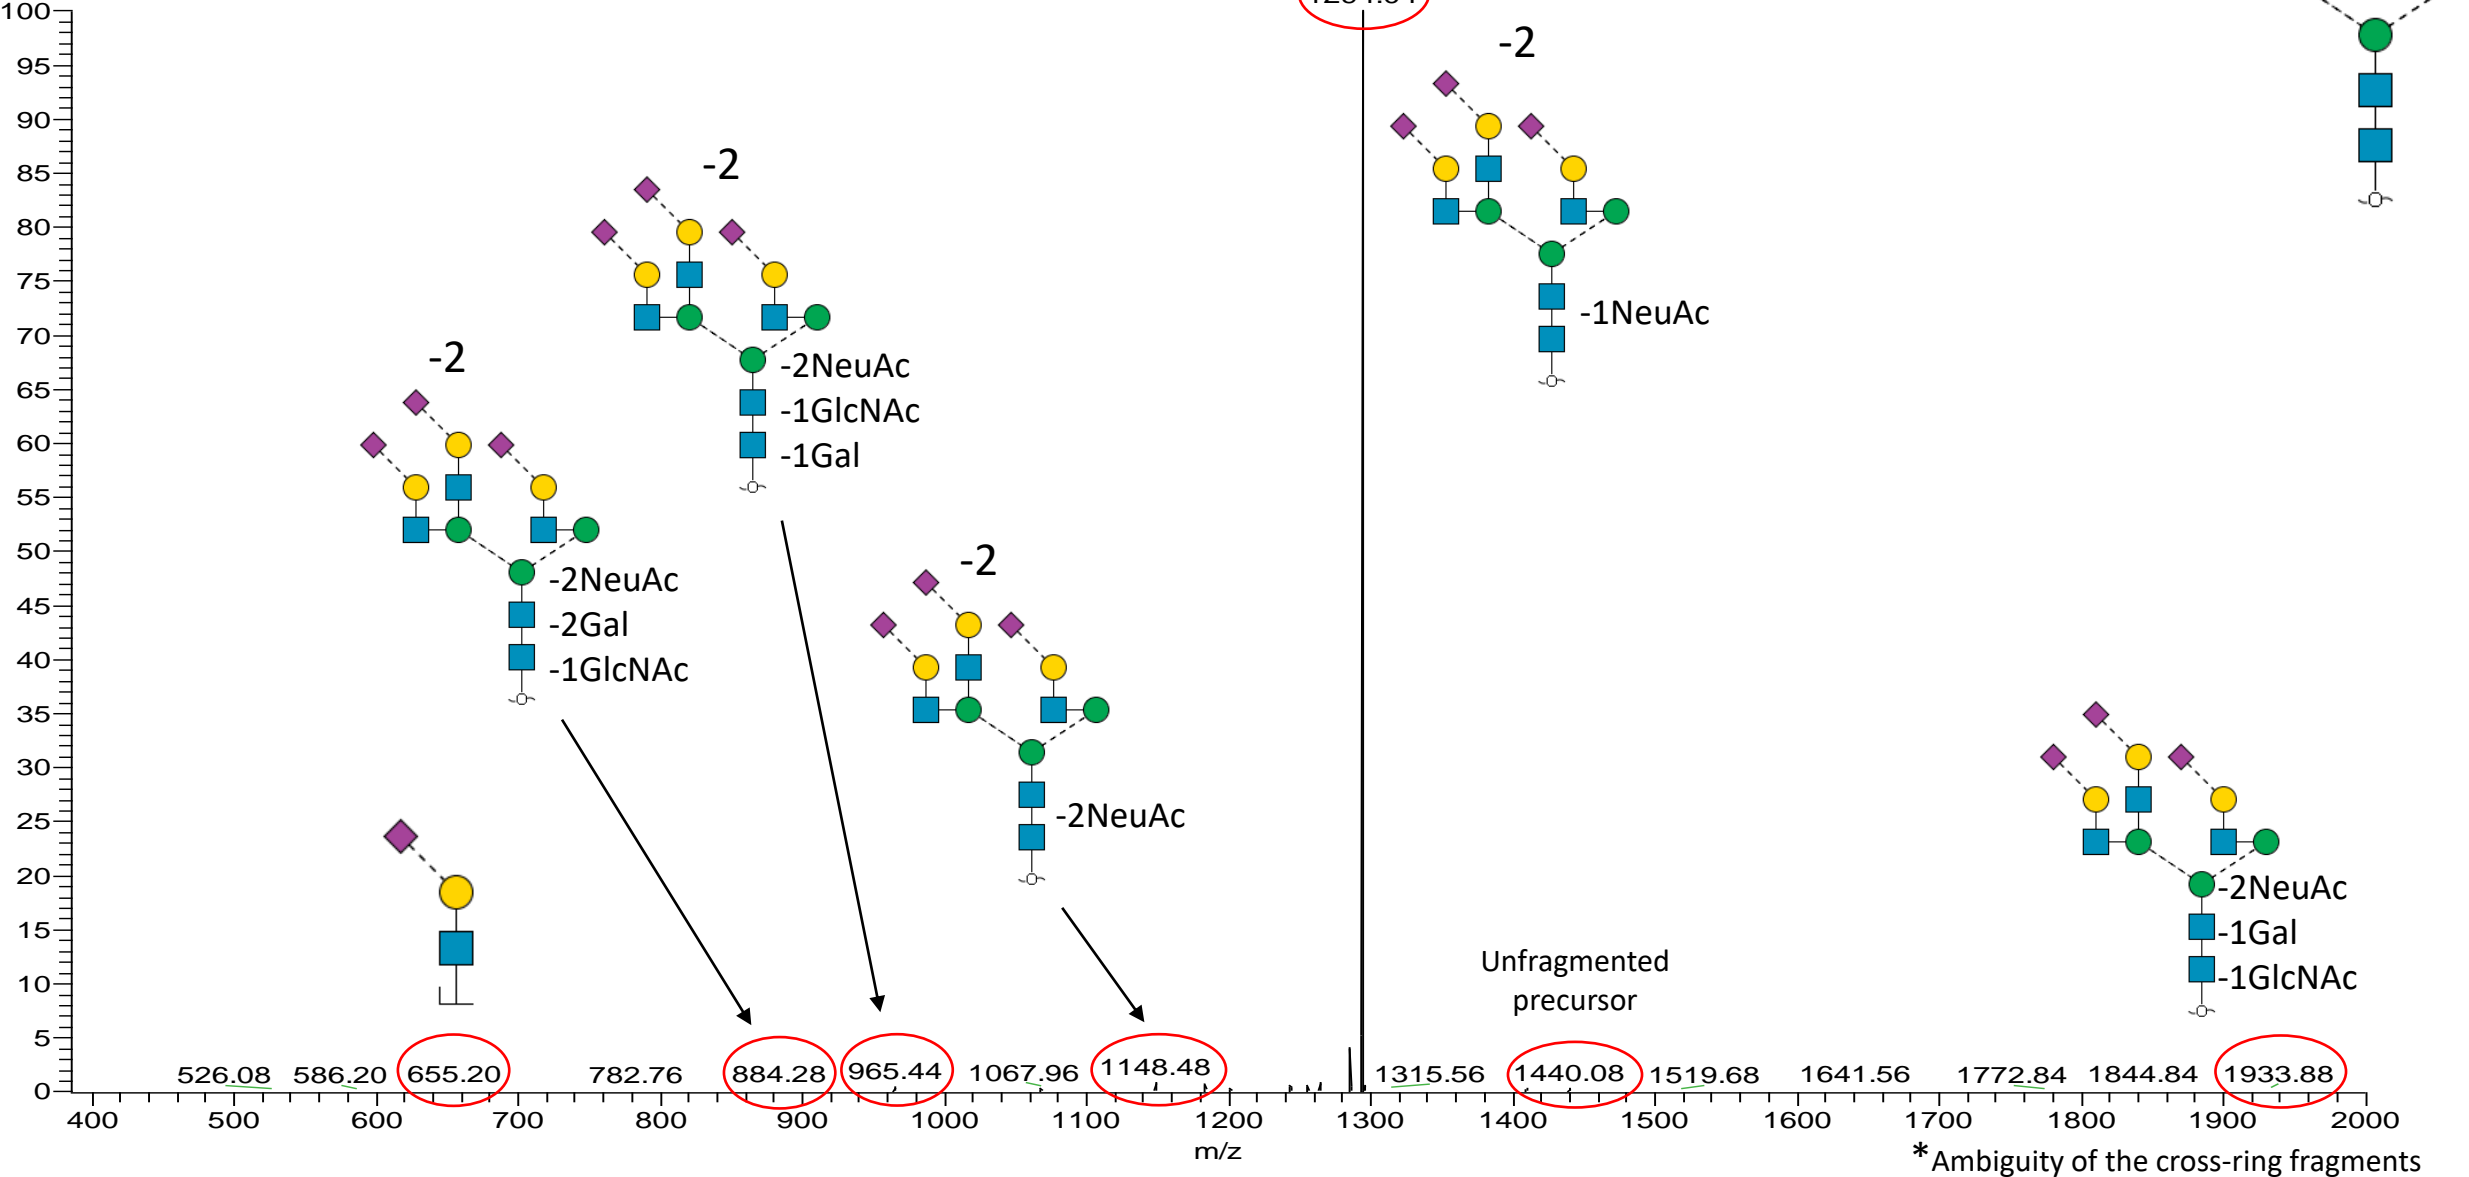

Observed  $m/z$  1008.0 (3-), RT: ~32.3 min  
[M-H]<sup>-</sup> 3026.06 Da, [M-2H]<sup>2-</sup> 1512.5 Da

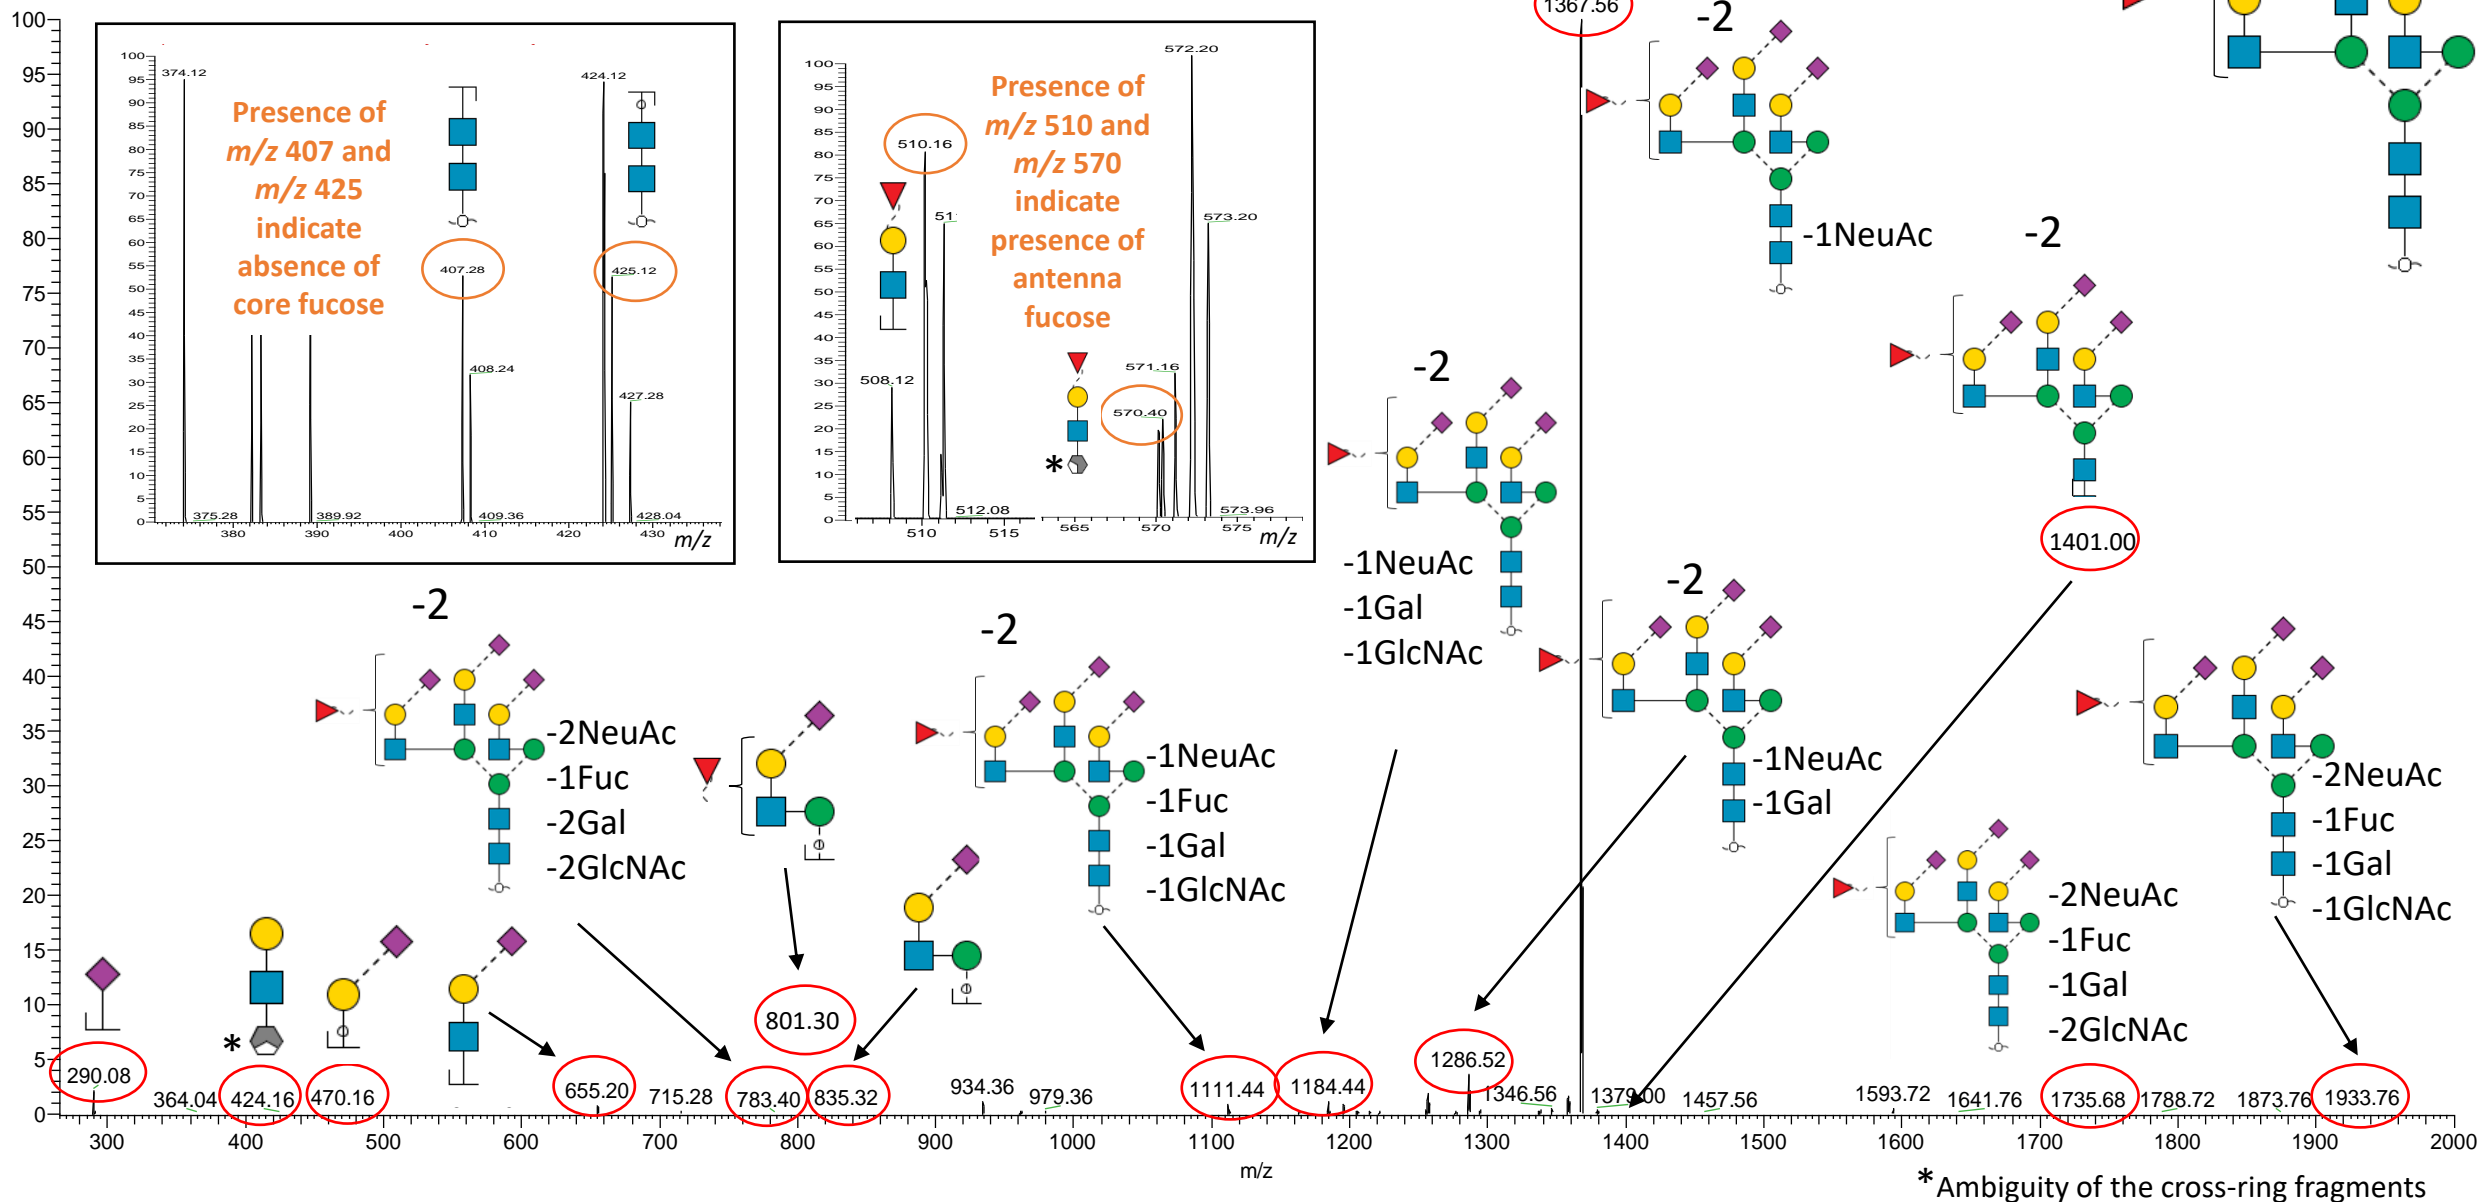

Glycan #40b

Observed  $m/z$  1008.0 (3-), RT: ~39.3 min  
[M-H]<sup>-</sup> 3026.06 Da , [M-2H]<sup>2-</sup> 1512.5 Da

Note: Based on PGC-LC elution pattern, this glycan is annotated as the  $\alpha$ 2,6- $\alpha$ 2,6- $\alpha$ 2,3-sialyl linkage isomer but the exact position and antennary branching cannot be determined. Antenna fucose position and linkage also cannot be determined.

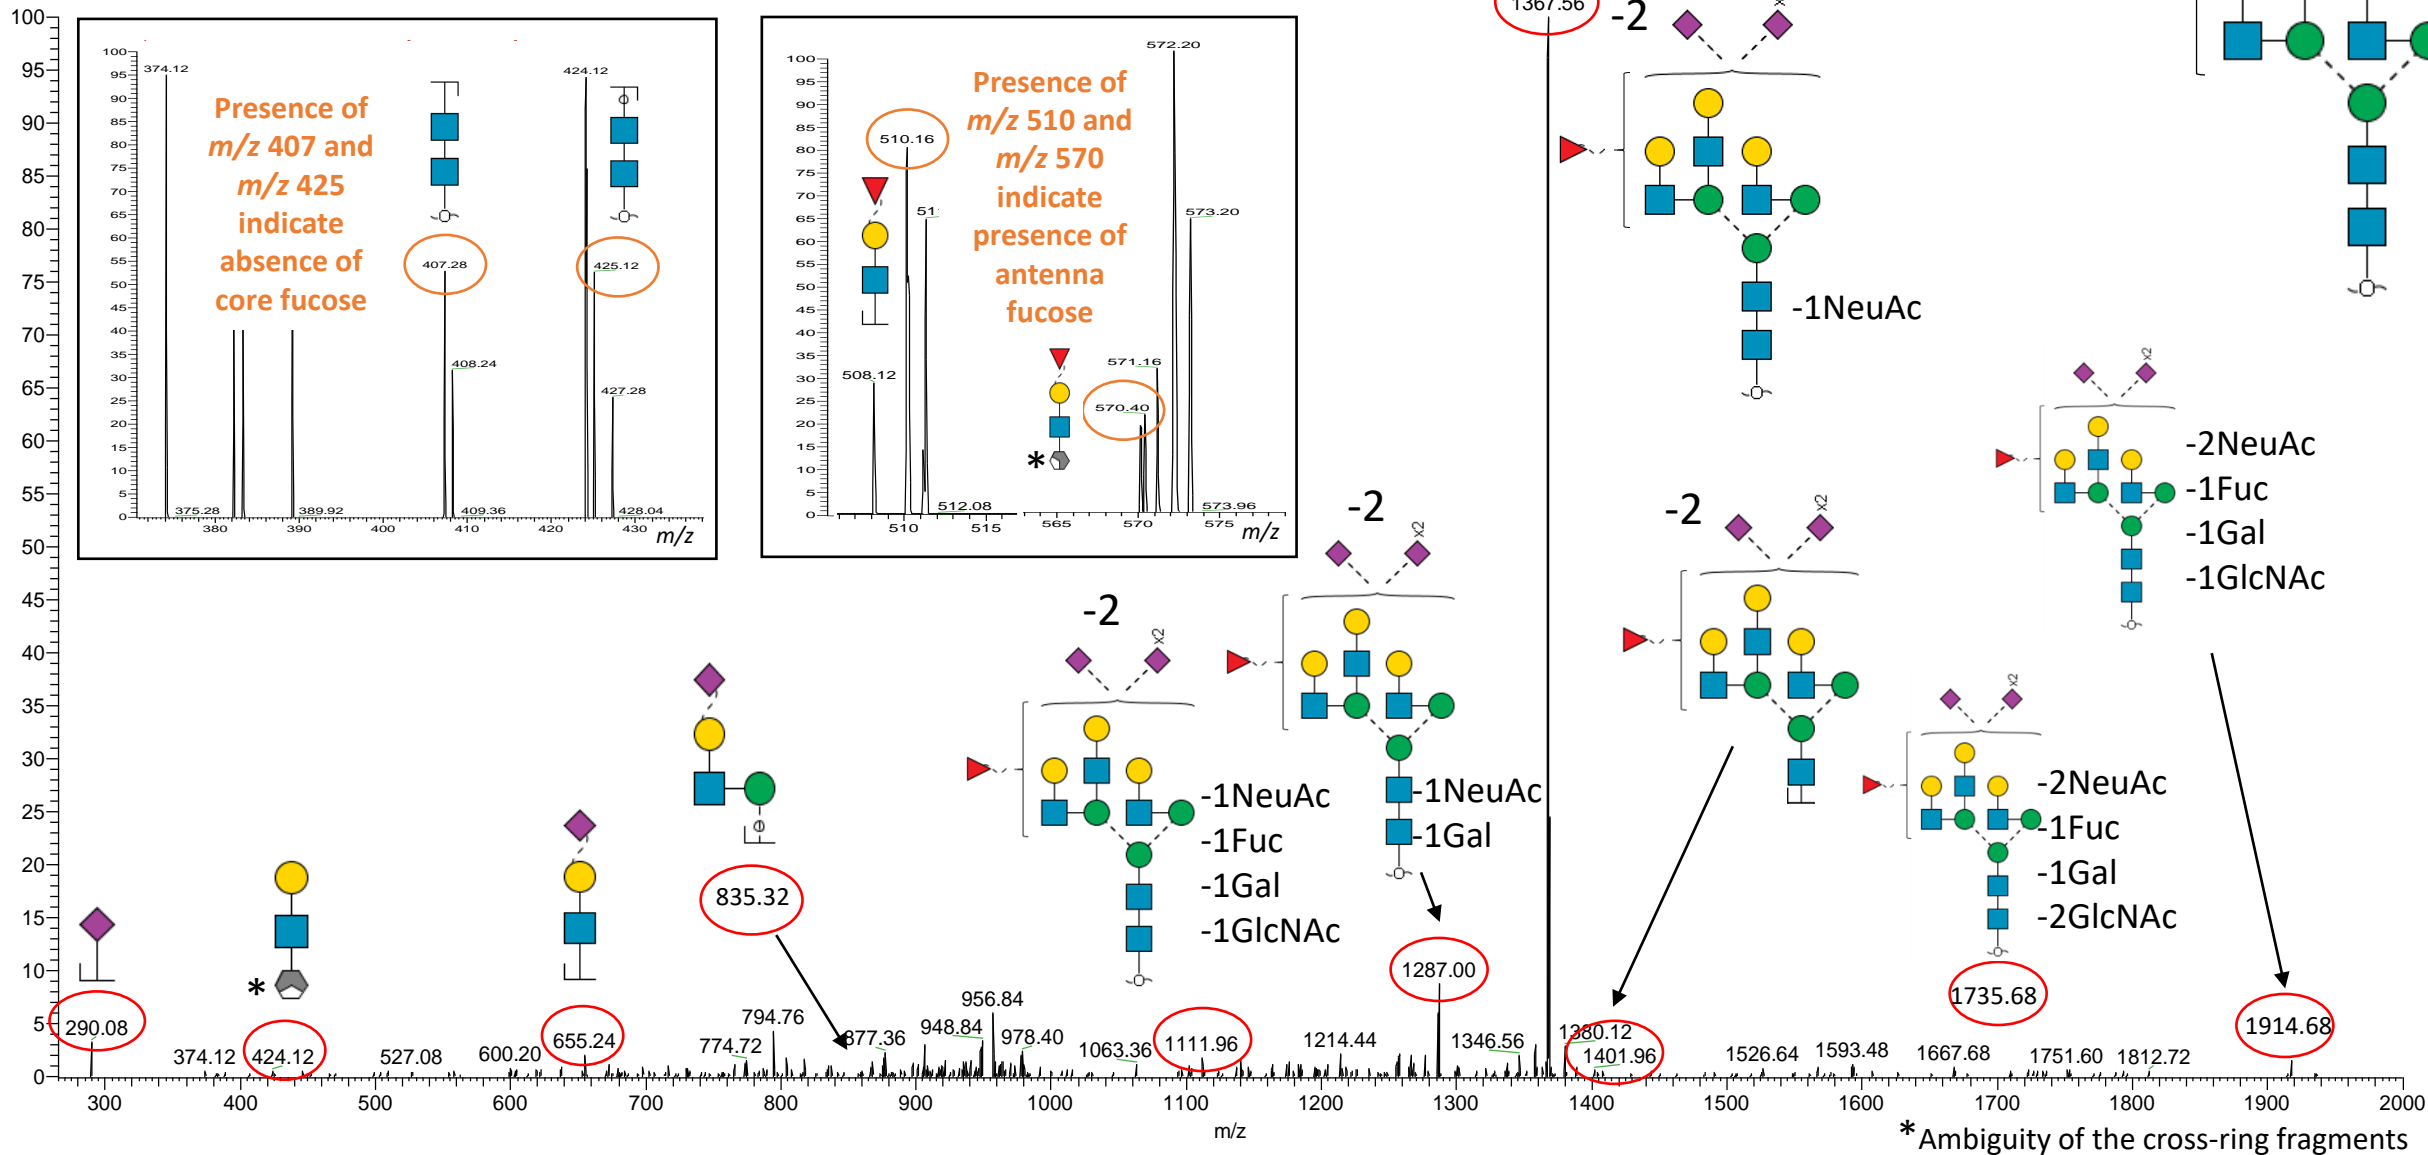

Observed  $m/z$  1008.0 (3-), RT: ~42.2 min  
[M-H]<sup>-</sup> 3026.06 Da , [M-2H]<sup>2-</sup> 1512.5 Da

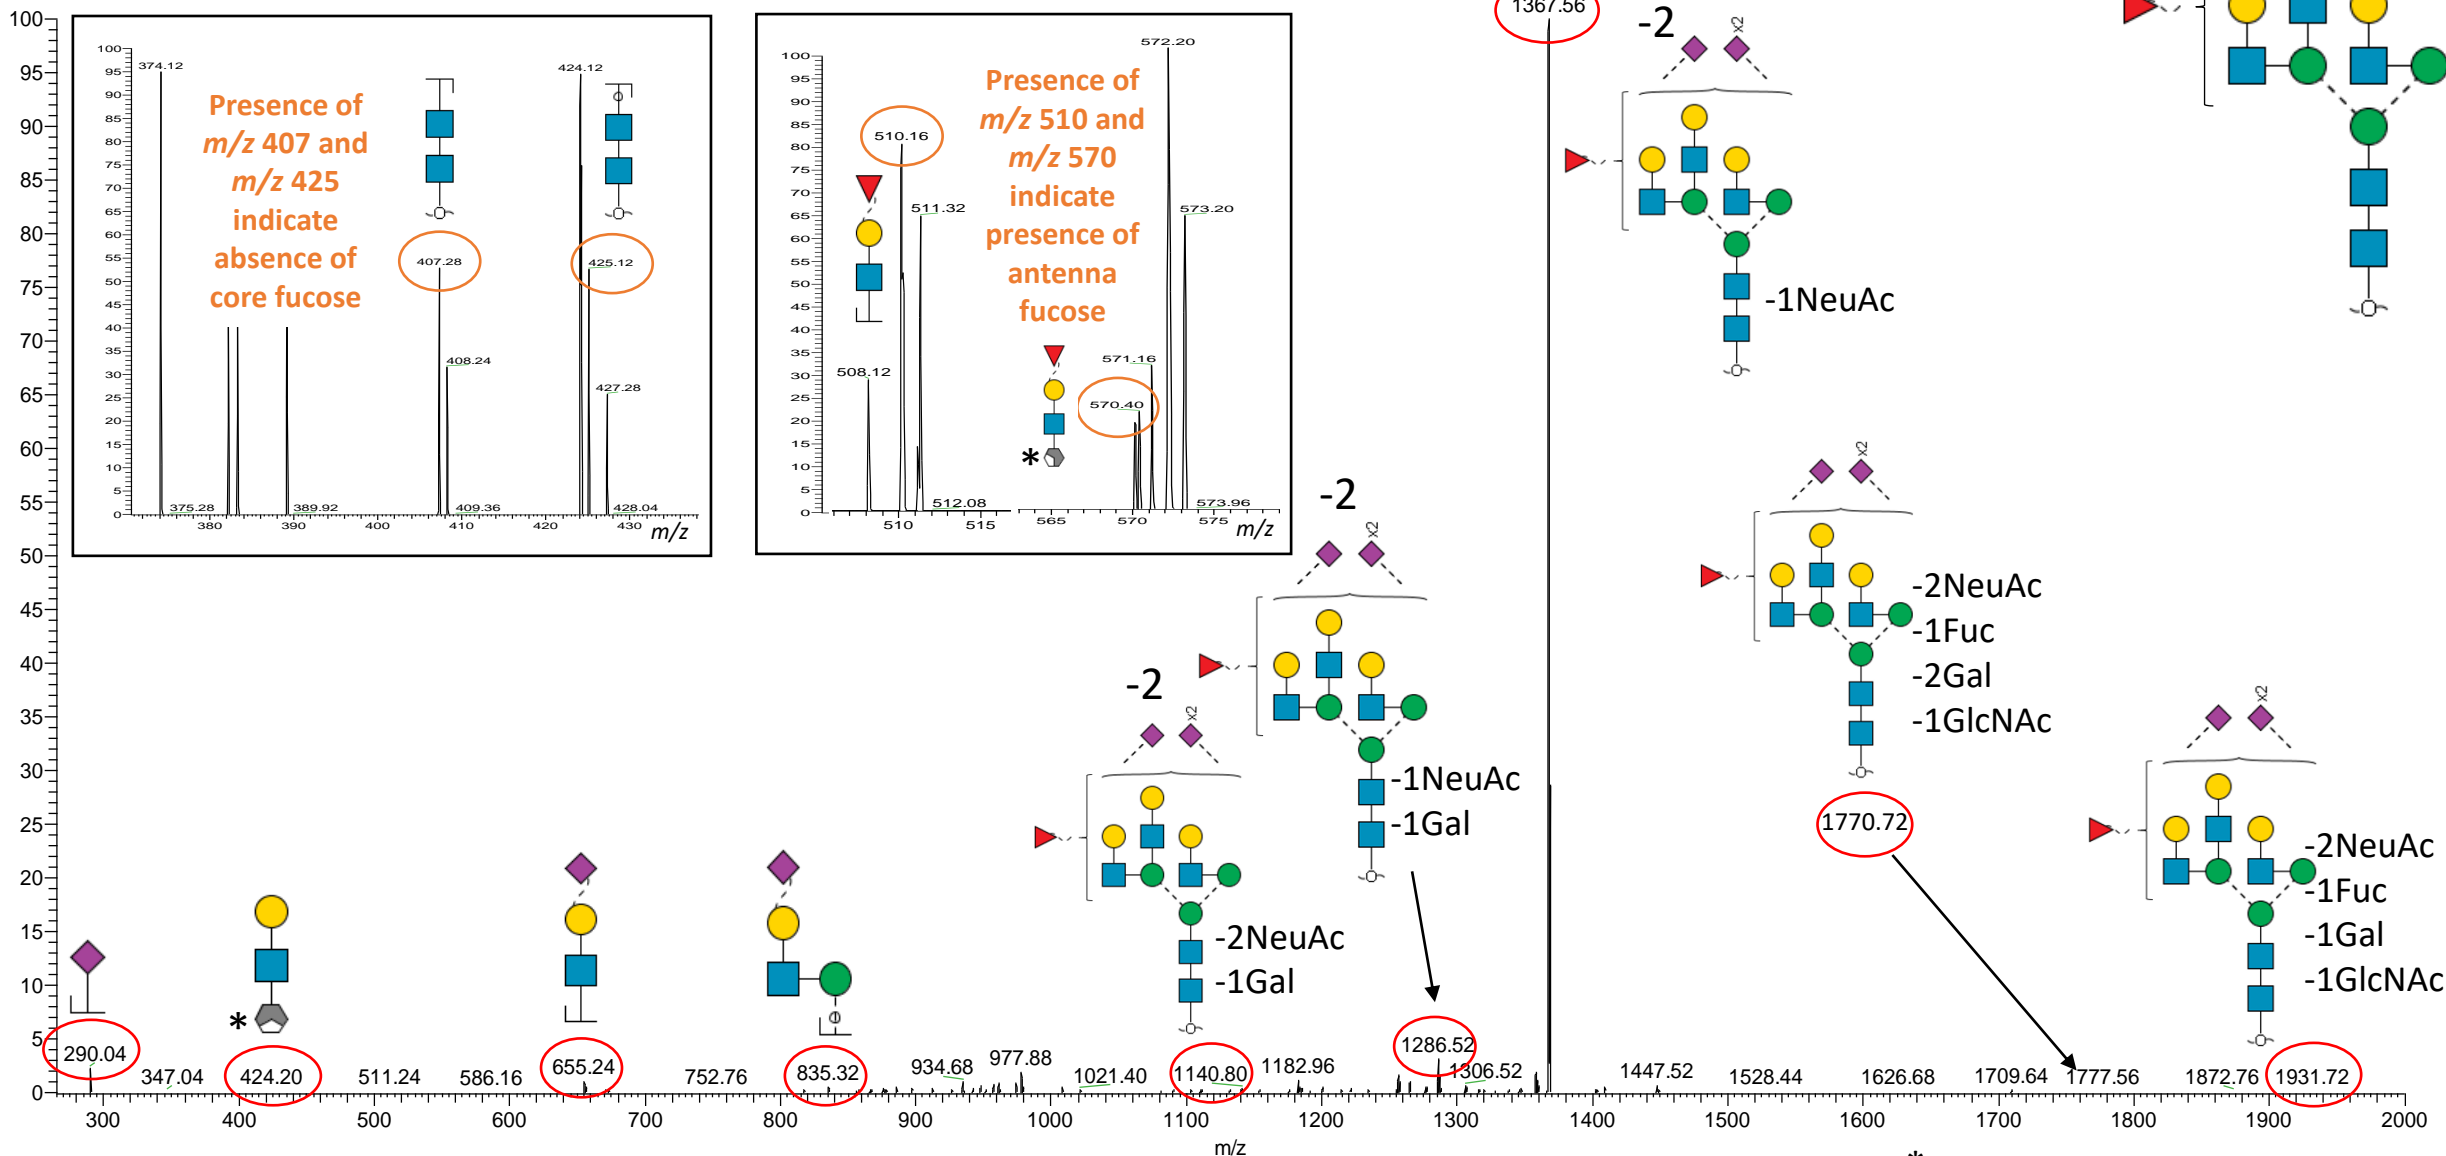

\*Ambiguity of the cross-ring fragments

Glycan #40d

Observed  $m/z$  1008.0 (3-), RT: ~53.0 min  
[M-H]<sup>-</sup> 3026.06 Da , [M-2H]<sup>2-</sup> 1512.5 Da

Note: Based on PGC-LC elution pattern, this glycan is annotated as the  $\alpha$ 2,3- $\alpha$ 2,3-sialyl linkage isomer but the antennary branching cannot be determined. Antenna fucose position and linkage also cannot be determined.

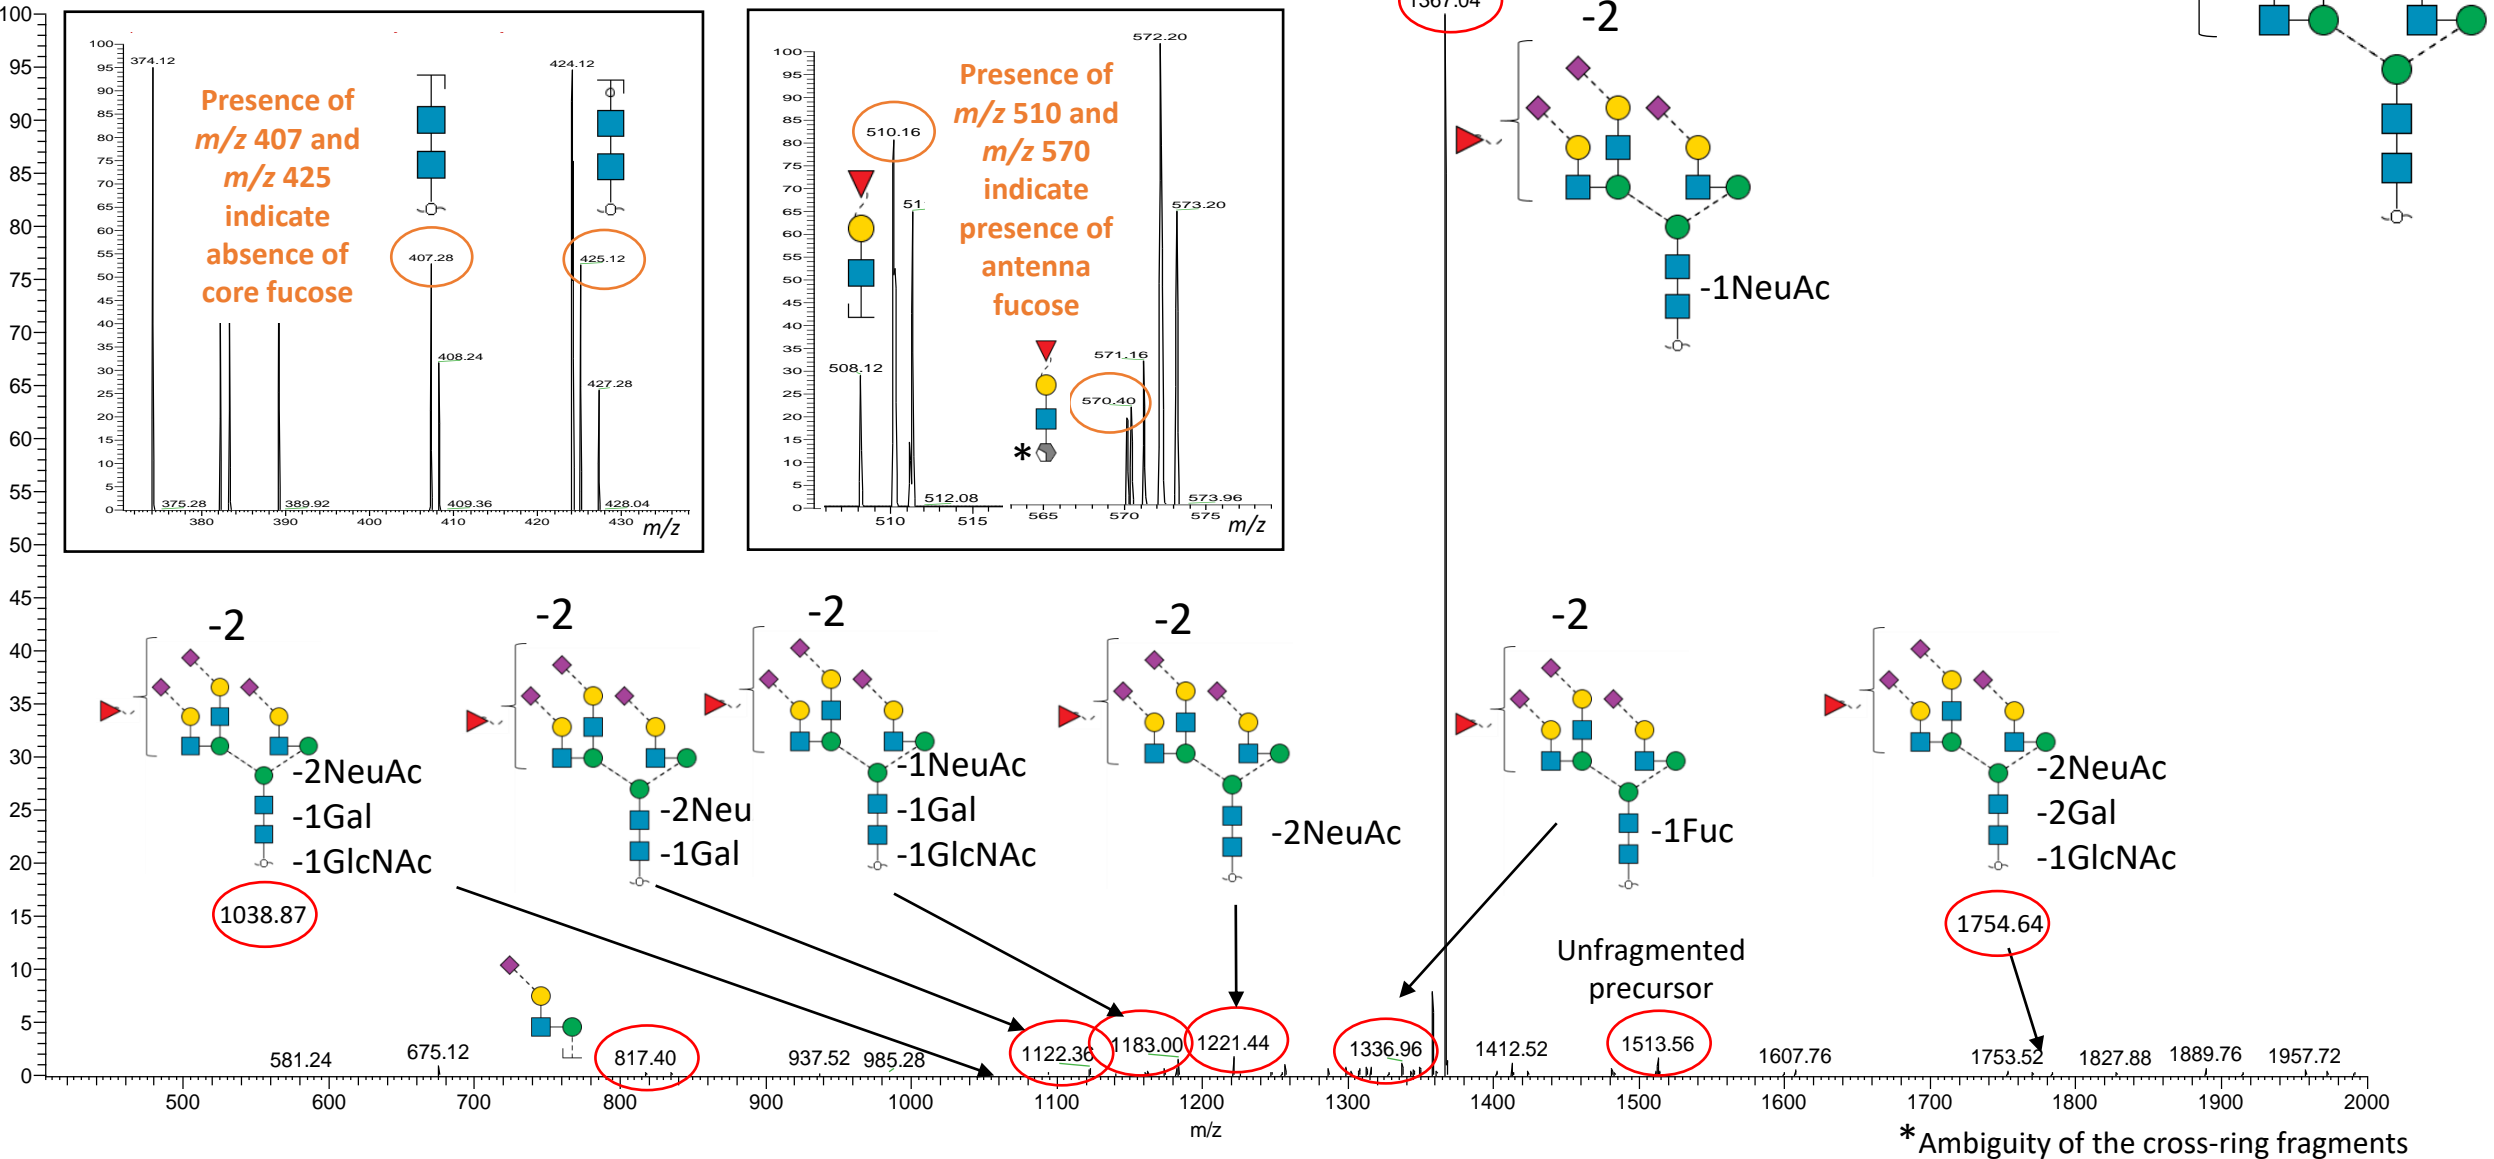

## Glycan #41a

Observed  $m/z$  1178.08 (3-), RT: ~46.2 min

$[M-H]^-$  3536.22 Da,  $[M-2H]^{2-}$  1767.6 Da

Note: This glycan has not been annotated with sialyl linkage isomers and the antenna branching also cannot be determined from the PGC-LC elution pattern.

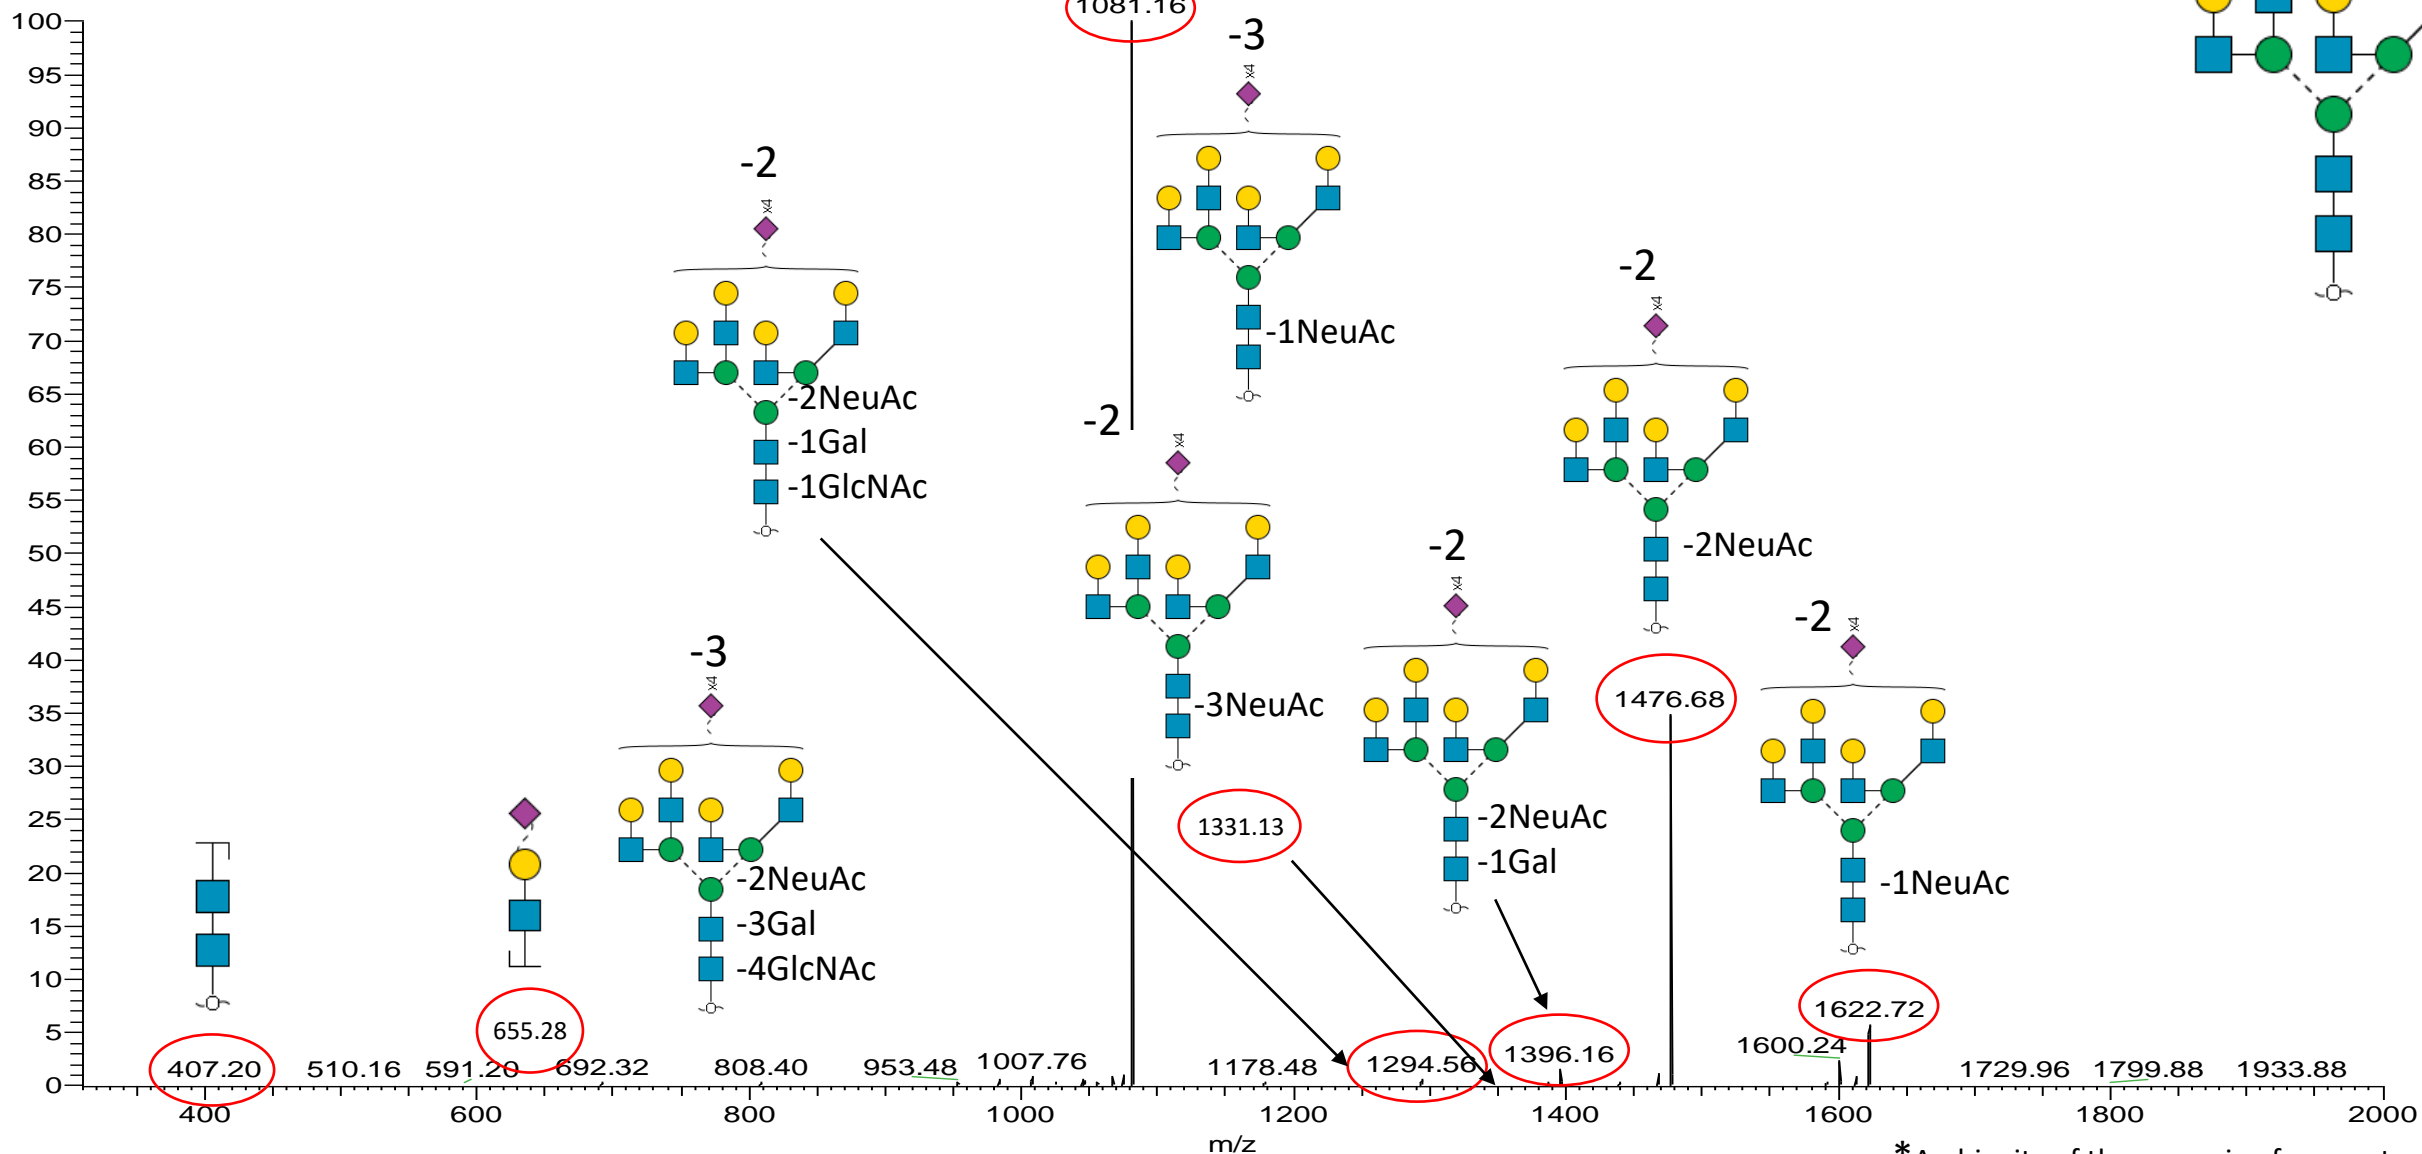

## Glycan #41b

Observed  $m/z$  1178.08 (3-), RT: ~52.9 min  
[M-H]<sup>-</sup> 3536.22 Da, [M-2H]<sup>2-</sup> 1767.6 Da

Note: This glycan has not been annotated with sialyl linkage isomers and the antenna branching also cannot be determined from the PGC-LC elution pattern.

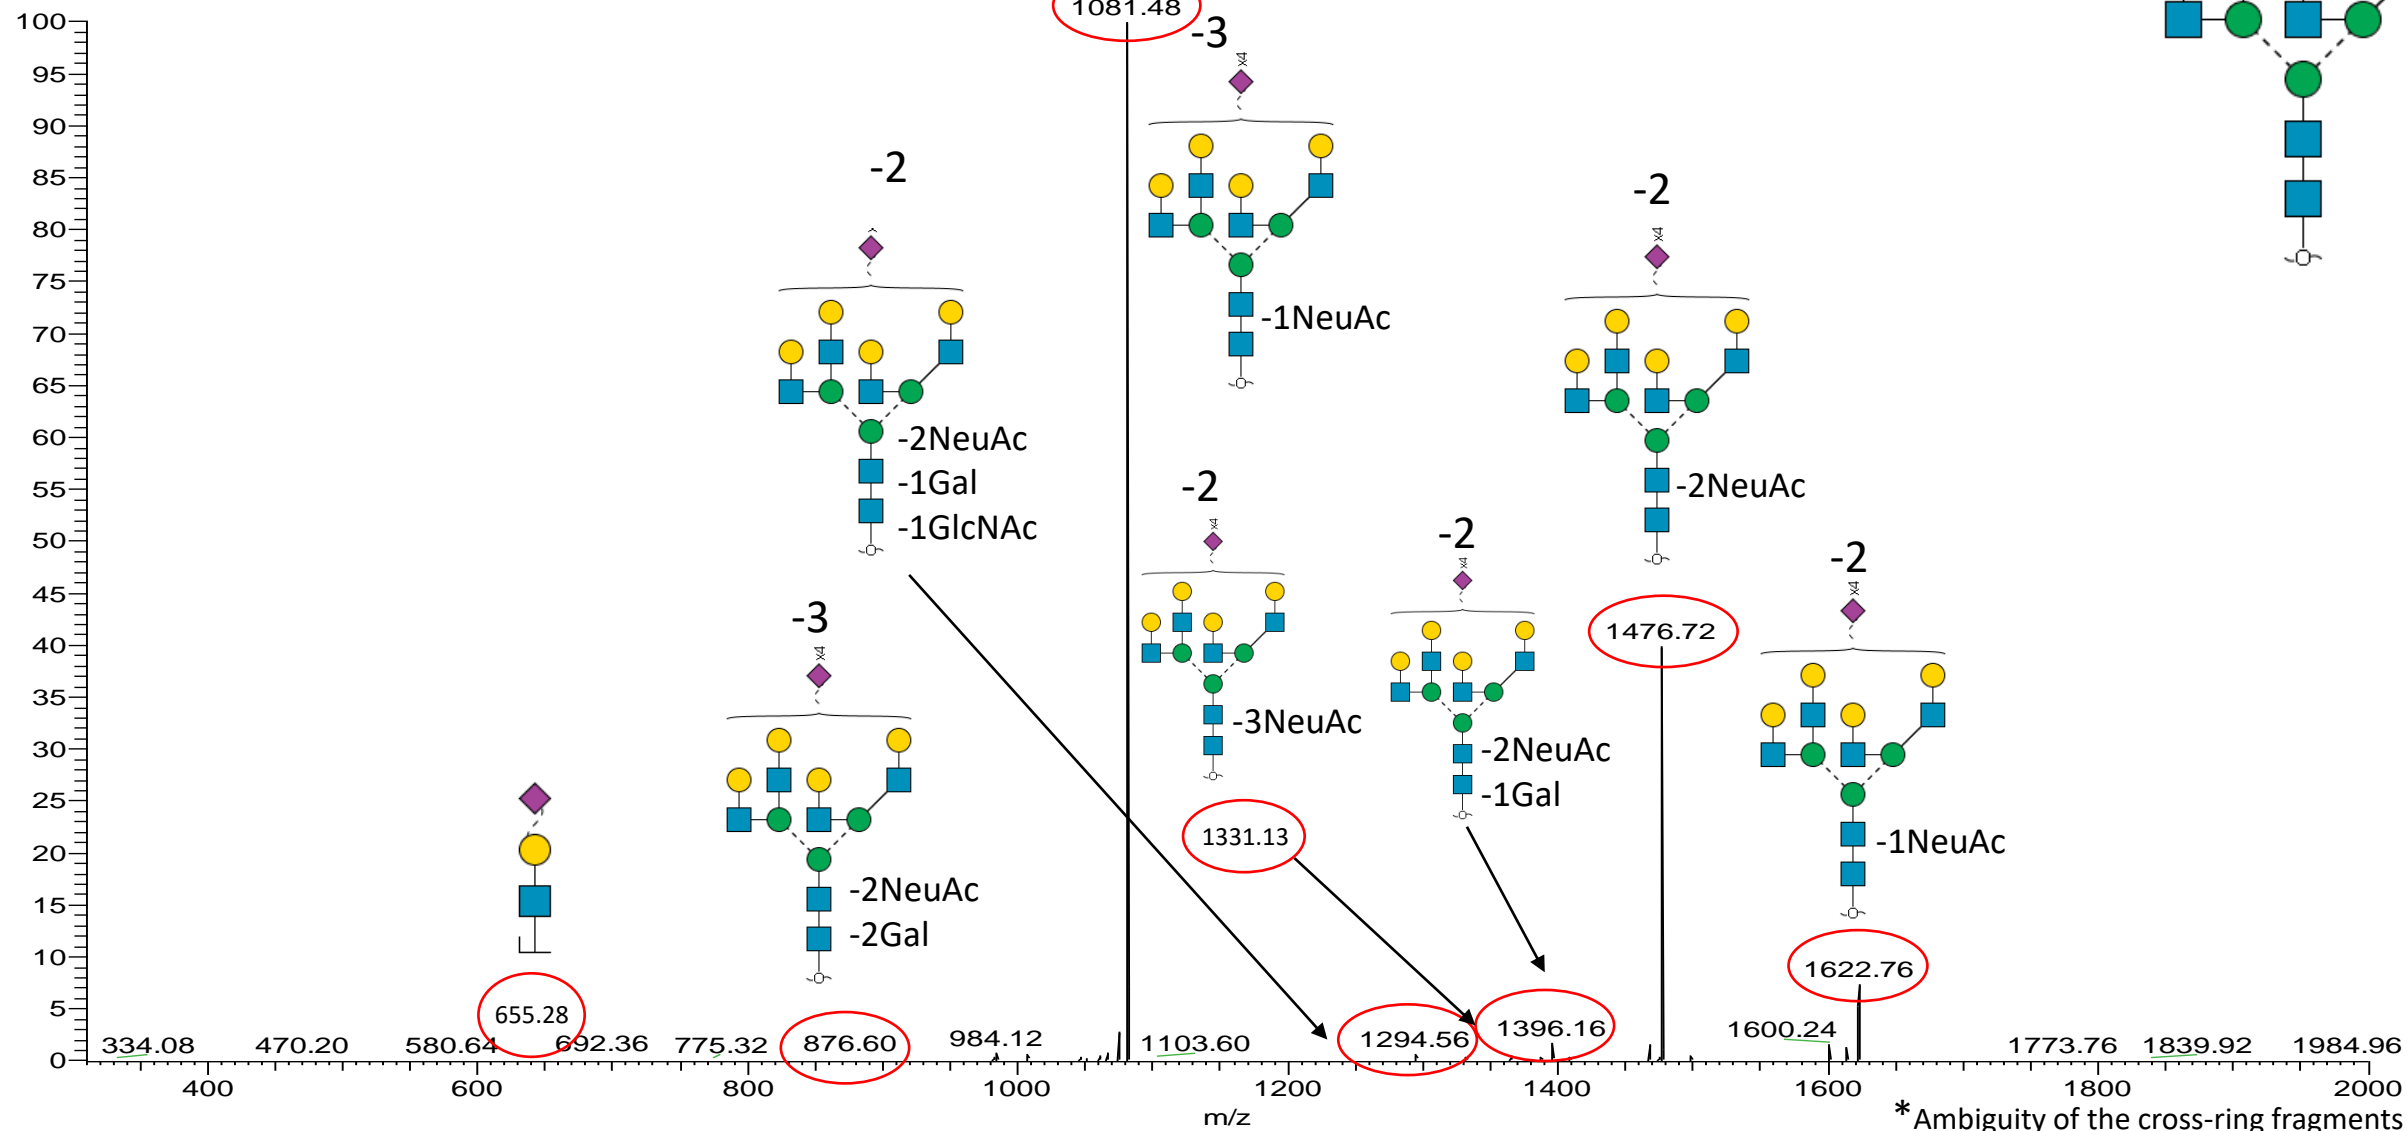

# Glycan #41c

Observed  $m/z$  1178.08 (3-), RT: ~56.2 min  
[M-H]<sup>-</sup> 3536.22 Da, [M-2H]<sup>2-</sup> 1767.6 Da

Note: This glycan has not been annotated with sialyl linkage isomers and the antenna branching also cannot be determined from the PGC-LC elution pattern.

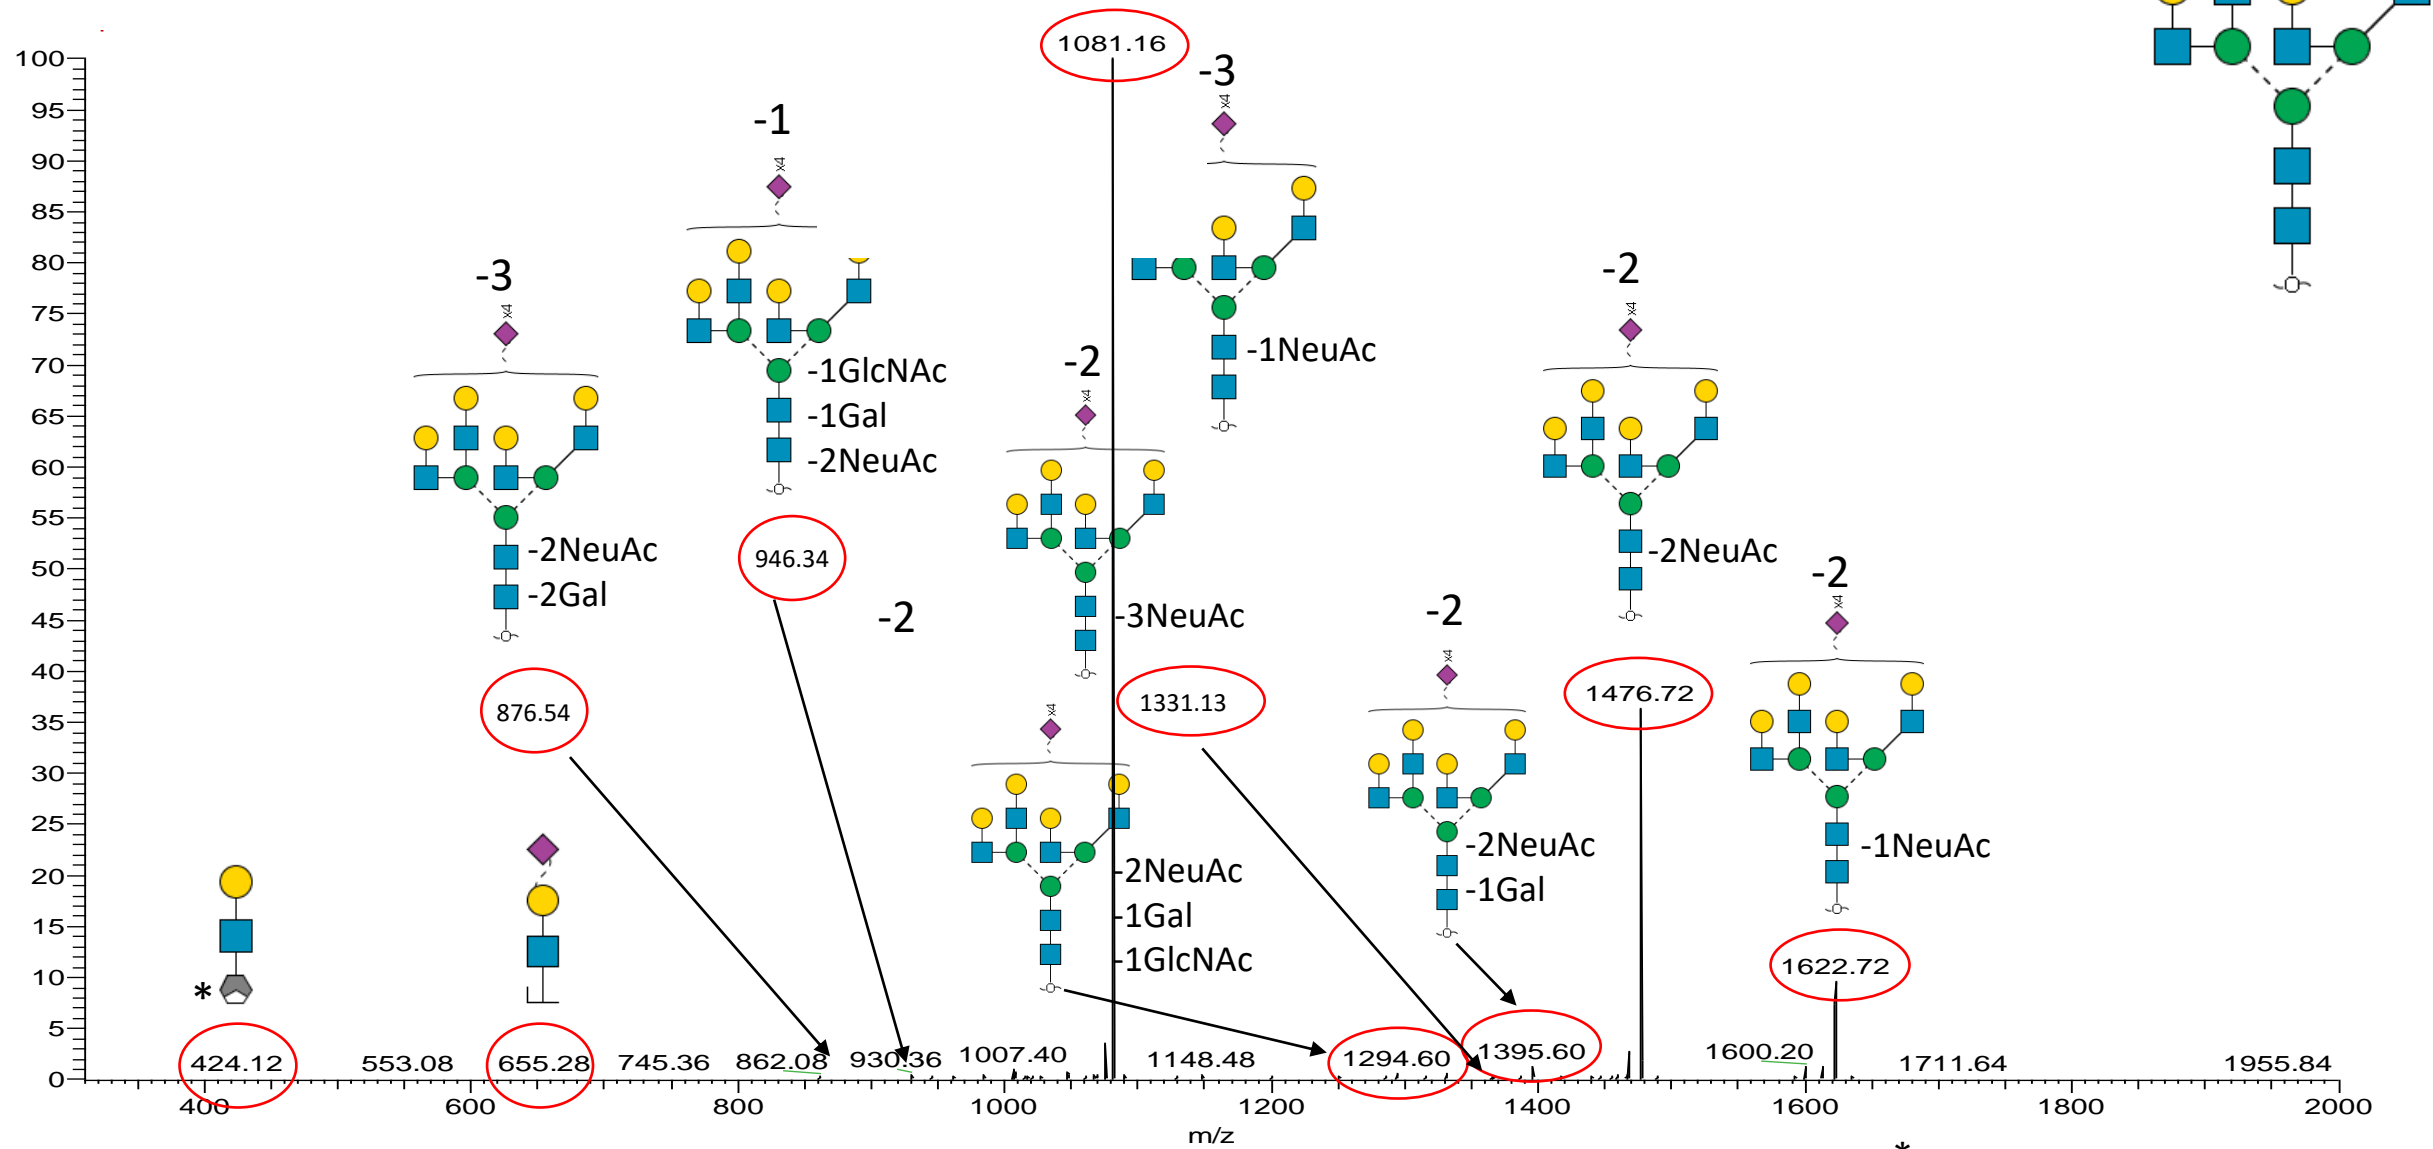

\* Ambiguity of the cross-ring fragments
